# Supplementary material for: Spen links RNA-mediated endogenous retrovirus silencing and X chromosome inactivation
Source: eLife journal article supplement (doi:10.7554/elife.54508), 2020-05-07
Supplement: supp [file elife_poa_e54508_Figure_3_figure_supplement_3.pdf › elife_poa_e54508_Figure_3_figure_supplement_3.pdf]

Figure 3- figure supplement 3

Motifs enriched in irCLIP-seq clusters

## a All mRNA and ncRNA

| Motif                                                                             | p-value   | % of targets | % of background |
|-----------------------------------------------------------------------------------|-----------|--------------|-----------------|
|  | 1.00E-585 | 29.97        | 11.29           |
|  | 1.00E-485 | 40.38        | 20.27           |
|  | 1.00E-269 | 32.52        | 18.27           |
|  | 1.00E-262 | 24.08        | 11.9            |
|  | 1.00E-79  | 9.21         | 4.81            |

## b All TEs

| Motif                                                                              | p-value    | % of targets | % of background |
|------------------------------------------------------------------------------------|------------|--------------|-----------------|
|   | 1.00E-1367 | 32.81        | 4.7             |
|   | 1.00E-717  | 53.47        | 23.34           |
|   | 1.00E-463  | 23.6         | 7.02            |
|   | 1.00E-302  | 15.03        | 4.23            |
|  | 1.00E-98   | 5.61         | 1.7             |

## c All ERVKs

| Motif                                                                               | p-value  | % of targets | % of background |
|-------------------------------------------------------------------------------------|----------|--------------|-----------------|
|  | 1.00E-83 | 47.21        | 16.06           |
|  | 1.00E-60 | 33.7         | 10.7            |
|  | 1.00E-57 | 35.1         | 11.93           |
|  | 1.00E-31 | 3.2          | 0.06            |
|  | 1.00E-27 | 6.41         | 0.73            |
