# Supplementary material for: Spen links RNA-mediated endogenous retrovirus silencing and X chromosome inactivation
Source: eLife. 2020 May 7;9:e54508. doi: 10.7554/eLife.54508 (PMC7282817; doi:10.7554/eLife.54508)
Supplement: Supplementary file 1. [file elife-54508-supp1.xlsx]

## Sheet: RRM2-4 mRNA lncRNA
chr1	4766785	4766801	cluster:397	68	-	chr1	4763287	4775820	ENSMUSG00000033845.7	Mrpl15	-	16
chr1	4766851	4766874	cluster:398	177	-	chr1	4763287	4775820	ENSMUSG00000033845.7	Mrpl15	-	23
chr1	4767699	4767706	cluster:406	64	-	chr1	4763287	4775820	ENSMUSG00000033845.7	Mrpl15	-	7
chr1	4768883	4768903	cluster:411	129	-	chr1	4763287	4775820	ENSMUSG00000033845.7	Mrpl15	-	20
chr1	4770533	4770536	cluster:434	134	-	chr1	4763287	4775820	ENSMUSG00000033845.7	Mrpl15	-	3
chr1	4772111	4772125	cluster:449	188	-	chr1	4763287	4775820	ENSMUSG00000033845.7	Mrpl15	-	14
chr1	4772671	4772673	cluster:455	117	-	chr1	4763287	4775820	ENSMUSG00000033845.7	Mrpl15	-	2
chr1	4772761	4772786	cluster:459	91	-	chr1	4763287	4775820	ENSMUSG00000033845.7	Mrpl15	-	25
chr1	4798546	4798561	cluster:514	41	+	chr1	4797869	4876851	ENSMUSG00000025903.8	Lypla1	+	15
chr1	4808487	4808498	cluster:562	216	+	chr1	4797869	4876851	ENSMUSG00000025903.8	Lypla1	+	11
chr1	4822407	4822421	cluster:621	128	+	chr1	4797869	4876851	ENSMUSG00000025903.8	Lypla1	+	14
chr1	4834224	4834232	cluster:688	81	+	chr1	4797869	4876851	ENSMUSG00000025903.8	Lypla1	+	8
chr1	4835475	4835494	cluster:708	113	+	chr1	4797869	4876851	ENSMUSG00000025903.8	Lypla1	+	19
chr1	4836163	4836175	cluster:725	123	+	chr1	4797869	4876851	ENSMUSG00000025903.8	Lypla1	+	12
chr1	4836262	4836270	cluster:730	48	+	chr1	4797869	4876851	ENSMUSG00000025903.8	Lypla1	+	8
chr1	4836552	4836554	cluster:739	128	+	chr1	4797869	4876851	ENSMUSG00000025903.8	Lypla1	+	2
chr1	4849048	4849066	cluster:766	60	+	chr1	4797869	4876851	ENSMUSG00000025903.8	Lypla1	+	18
chr1	4849048	4849066	cluster:766	60	+	chr1	4847775	4887987	ENSMUSG00000033813.8	Tcea1	+	18
chr1	4882971	4882983	cluster:928	44	+	chr1	4847775	4887987	ENSMUSG00000033813.8	Tcea1	+	12
chr1	5073291	5073294	cluster:1114	104	+	chr1	5073254	5152630	ENSMUSG00000033793.7	Atp6v1h	+	3
chr1	5088183	5088191	cluster:1194	177	+	chr1	5073254	5152630	ENSMUSG00000033793.7	Atp6v1h	+	8
chr1	6239902	6239916	cluster:1688	67	+	chr1	6196278	6266729	ENSMUSG00000025907.7	Rb1cc1	+	14
chr1	6241651	6241659	cluster:1700	136	+	chr1	6196278	6266729	ENSMUSG00000025907.7	Rb1cc1	+	8
chr1	7079742	7079749	cluster:1915	64	+	chr1	7079001	7163707	ENSMUSG00000051285.9	Pcmtd1	+	7
chr1	7138704	7138708	cluster:2244	79	+	chr1	7079001	7163707	ENSMUSG00000051285.9	Pcmtd1	+	4
chr1	7139482	7139496	cluster:2260	59	+	chr1	7079001	7163707	ENSMUSG00000051285.9	Pcmtd1	+	14
chr1	7140109	7140122	cluster:2266	27	+	chr1	7079001	7163707	ENSMUSG00000051285.9	Pcmtd1	+	13
chr1	7143579	7143586	cluster:2294	131	+	chr1	7079001	7163707	ENSMUSG00000051285.9	Pcmtd1	+	7
chr1	7159668	7159682	cluster:2414	51	+	chr1	7079001	7163707	ENSMUSG00000051285.9	Pcmtd1	+	14
chr1	7161353	7161370	cluster:2429	53	+	chr1	7079001	7163707	ENSMUSG00000051285.9	Pcmtd1	+	17
chr1	9713733	9713744	cluster:3231	67	-	chr1	9708703	9738463	ENSMUSG00000045210.8	Vcpip1	-	11
chr1	9713765	9713781	cluster:3232	158	-	chr1	9708703	9738463	ENSMUSG00000045210.8	Vcpip1	-	16
chr1	10014995	10015001	cluster:3532	88	-	chr1	10014683	10028208	ENSMUSG00000025917.3	Cops5	-	6
chr1	10015012	10015049	cluster:3533	287	-	chr1	10014683	10028208	ENSMUSG00000025917.3	Cops5	-	37
chr1	10020743	10020754	cluster:3559	35	-	chr1	10014683	10028208	ENSMUSG00000025917.3	Cops5	-	11
chr1	10024099	10024103	cluster:3586	21	-	chr1	10014683	10028208	ENSMUSG00000025917.3	Cops5	-	4
chr1	10025212	10025226	cluster:3592	65	-	chr1	10014683	10028208	ENSMUSG00000025917.3	Cops5	-	14
chr1	10050834	10050851	cluster:3700	59	+	chr1	10028299	10126849	ENSMUSG00000056763.9	Cspp1	+	17
chr1	10064887	10064896	cluster:3851	91	+	chr1	10028299	10126849	ENSMUSG00000056763.9	Cspp1	+	9
chr1	10066603	10066621	cluster:3874	52	+	chr1	10028299	10126849	ENSMUSG00000056763.9	Cspp1	+	18
chr1	10171029	10171041	cluster:4236	46	-	chr1	10127652	10222751	ENSMUSG00000067851.5	Arfgef1	-	12
chr1	13344745	13344747	cluster:6480	125	-	chr1	13129186	13364164	ENSMUSG00000005886.8	Ncoa2	-	2
chr1	13560136	13560146	cluster:6646	68	-	chr1	13554783	13579945	ENSMUSG00000025935.4	Tram1	-	10
chr1	13561907	13561917	cluster:6648	84	-	chr1	13554783	13579945	ENSMUSG00000025935.4	Tram1	-	10
chr1	13562106	13562113	cluster:6651	58	-	chr1	13554783	13579945	ENSMUSG00000025935.4	Tram1	-	7
chr1	13616843	13616867	cluster:6782	81	-	chr1	13614926	13650627	ENSMUSG00000025937.5	Lactb2	-	24
chr1	13625566	13625576	cluster:6844	58	-	chr1	13614926	13650627	ENSMUSG00000025937.5	Lactb2	-	10
chr1	13630945	13630956	cluster:6884	75	-	chr1	13614926	13650627	ENSMUSG00000025937.5	Lactb2	-	11
chr1	13632635	13632641	cluster:6905	35	-	chr1	13614926	13650627	ENSMUSG00000025937.5	Lactb2	-	6
chr1	13634114	13634118	cluster:6926	116	-	chr1	13614926	13650627	ENSMUSG00000025937.5	Lactb2	-	4
chr1	13634251	13634259	cluster:6928	57	-	chr1	13614926	13650627	ENSMUSG00000025937.5	Lactb2	-	8
chr1	15798315	15798322	cluster:7530	69	+	chr1	15795739	15833551	ENSMUSG00000025925.7	Terf1	+	7
chr1	15798414	15798426	cluster:7531	73	+	chr1	15795739	15833551	ENSMUSG00000025925.7	Terf1	+	12
chr1	15801812	15801816	cluster:7566	103	+	chr1	15795739	15833551	ENSMUSG00000025925.7	Terf1	+	4
chr1	15803136	15803151	cluster:7574	83	+	chr1	15795739	15833551	ENSMUSG00000025925.7	Terf1	+	15
chr1	15809742	15809753	cluster:7632	153	+	chr1	15795739	15833551	ENSMUSG00000025925.7	Terf1	+	11
chr1	15830680	15830708	cluster:7720	91	+	chr1	15795739	15833551	ENSMUSG00000025925.7	Terf1	+	28
chr1	16092796	16092812	cluster:7879	81	-	chr1	16091376	16094743	ENSMUSG00000043716.7	Rpl7	-	16
chr1	20793123	20793165	cluster:9301	87	-	chr1	20793055	20810359	ENSMUSG00000041859.9	Mcm3	-	42
chr1	20793270	20793286	cluster:9303	111	-	chr1	20793055	20810359	ENSMUSG00000041859.9	Mcm3	-	16
chr1	20793301	20793323	cluster:9304	128	-	chr1	20793055	20810359	ENSMUSG00000041859.9	Mcm3	-	22
chr1	20793421	20793428	cluster:9309	56	-	chr1	20793055	20810359	ENSMUSG00000041859.9	Mcm3	-	7
chr1	20793541	20793571	cluster:9313	227	-	chr1	20793055	20810359	ENSMUSG00000041859.9	Mcm3	-	30
chr1	20798897	20798927	cluster:9386	171	-	chr1	20793055	20810359	ENSMUSG00000041859.9	Mcm3	-	30
chr1	20799698	20799721	cluster:9394	82	-	chr1	20793055	20810359	ENSMUSG00000041859.9	Mcm3	-	23
chr1	20799742	20799752	cluster:9395	67	-	chr1	20793055	20810359	ENSMUSG00000041859.9	Mcm3	-	10
chr1	20800298	20800304	cluster:9409	87	-	chr1	20793055	20810359	ENSMUSG00000041859.9	Mcm3	-	6
chr1	20802075	20802096	cluster:9420	104	-	chr1	20793055	20810359	ENSMUSG00000041859.9	Mcm3	-	21
chr1	20803044	20803057	cluster:9437	103	-	chr1	20793055	20810359	ENSMUSG00000041859.9	Mcm3	-	13
chr1	20803110	20803119	cluster:9438	94	-	chr1	20793055	20810359	ENSMUSG00000041859.9	Mcm3	-	9
chr1	20804818	20804838	cluster:9460	280	-	chr1	20793055	20810359	ENSMUSG00000041859.9	Mcm3	-	20
chr1	20804875	20804880	cluster:9461	46	-	chr1	20793055	20810359	ENSMUSG00000041859.9	Mcm3	-	5
chr1	20804925	20804945	cluster:9463	124	-	chr1	20793055	20810359	ENSMUSG00000041859.9	Mcm3	-	20
chr1	20806748	20806760	cluster:9477	82	-	chr1	20793055	20810359	ENSMUSG00000041859.9	Mcm3	-	12
chr1	20806772	20806811	cluster:9478	325	-	chr1	20793055	20810359	ENSMUSG00000041859.9	Mcm3	-	39
chr1	20806843	20806863	cluster:9480	68	-	chr1	20793055	20810359	ENSMUSG00000041859.9	Mcm3	-	20
chr1	20807512	20807521	cluster:9491	117	-	chr1	20793055	20810359	ENSMUSG00000041859.9	Mcm3	-	9
chr1	20807581	20807591	cluster:9493	92	-	chr1	20793055	20810359	ENSMUSG00000041859.9	Mcm3	-	10
chr1	20807958	20807977	cluster:9498	41	-	chr1	20793055	20810359	ENSMUSG00000041859.9	Mcm3	-	19
chr1	20808267	20808270	cluster:9502	45	-	chr1	20793055	20810359	ENSMUSG00000041859.9	Mcm3	-	3
chr1	20810267	20810303	cluster:9529	240	-	chr1	20793055	20810359	ENSMUSG00000041859.9	Mcm3	-	36
chr1	23865864	23865886	cluster:10656	89	-	chr1	23851685	23929156	ENSMUSG00000026155.7	Smap1	-	22
chr1	30860034	30860047	cluster:12291	73	-	chr1	30859187	30930539	ENSMUSG00000048874.8	Phf3	-	13
chr1	30870852	30870861	cluster:12394	77	-	chr1	30859187	30930539	ENSMUSG00000048874.8	Phf3	-	9
chr1	30876995	30877004	cluster:12411	92	-	chr1	30859187	30930539	ENSMUSG00000048874.8	Phf3	-	9
chr1	30883211	30883225	cluster:12457	47	-	chr1	30859187	30930539	ENSMUSG00000048874.8	Phf3	-	14
chr1	30885707	30885722	cluster:12482	98	-	chr1	30859187	30930539	ENSMUSG00000048874.8	Phf3	-	15
chr1	30887150	30887153	cluster:12506	83	-	chr1	30859187	30930539	ENSMUSG00000048874.8	Phf3	-	3
chr1	30919787	30919796	cluster:12726	52	-	chr1	30859187	30930539	ENSMUSG00000048874.8	Phf3	-	9
chr1	30924085	30924096	cluster:12764	40	-	chr1	30859187	30930539	ENSMUSG00000048874.8	Phf3	-	11
chr1	30929980	30929982	cluster:12813	76	-	chr1	30859187	30930539	ENSMUSG00000048874.8	Phf3	-	2
chr1	31005453	31005465	cluster:12899	75	-	chr1	30997148	31006615	ENSMUSG00000026064.8	Ptp4a1	-	12
chr1	33536462	33536467	cluster:13398	126	-	chr1	33510656	33726631	ENSMUSG00000026134.9	Prim2	-	5
chr1	33628199	33628216	cluster:13589	105	-	chr1	33510656	33726631	ENSMUSG00000026134.9	Prim2	-	17
chr1	33676267	33676276	cluster:13781	60	-	chr1	33510656	33726631	ENSMUSG00000026134.9	Prim2	-	9
chr1	33834136	33834147	cluster:14197	83	-	chr1	33817317	33871440	ENSMUSG00000042197.7	Zfp451	-	11
chr1	33844218	33844236	cluster:14261	36	-	chr1	33817317	33871440	ENSMUSG00000042197.7	Zfp451	-	18
chr1	33852843	33852850	cluster:14322	38	-	chr1	33817317	33871440	ENSMUSG00000042197.7	Zfp451	-	7
chr1	33855697	33855714	cluster:14350	52	-	chr1	33817317	33871440	ENSMUSG00000042197.7	Zfp451	-	17
chr1	33856602	33856618	cluster:14364	50	-	chr1	33817317	33871440	ENSMUSG00000042197.7	Zfp451	-	16
chr1	33856831	33856844	cluster:14367	85	-	chr1	33817317	33871440	ENSMUSG00000042197.7	Zfp451	-	13
chr1	33857687	33857693	cluster:14387	32	-	chr1	33817317	33871440	ENSMUSG00000042197.7	Zfp451	-	6
chr1	33858866	33858874	cluster:14404	110	-	chr1	33817317	33871440	ENSMUSG00000042197.7	Zfp451	-	8
chr1	33858966	33858983	cluster:14407	129	-	chr1	33817317	33871440	ENSMUSG00000042197.7	Zfp451	-	17
chr1	33859873	33859883	cluster:14418	58	-	chr1	33817317	33871440	ENSMUSG00000042197.7	Zfp451	-	10
chr1	33968262	33968284	cluster:14598	123	+	chr1	33965125	34365495	ENSMUSG00000026131.9	Dst	+	22
chr1	34082708	34082716	cluster:15054	85	+	chr1	33965125	34365495	ENSMUSG00000026131.9	Dst	+	8
chr1	34093991	34093997	cluster:15140	80	+	chr1	33965125	34365495	ENSMUSG00000026131.9	Dst	+	6
chr1	34094852	34094862	cluster:15145	74	+	chr1	33965125	34365495	ENSMUSG00000026131.9	Dst	+	10
chr1	34117836	34117849	cluster:15276	36	+	chr1	33965125	34365495	ENSMUSG00000026131.9	Dst	+	13
chr1	34176327	34176337	cluster:15544	119	+	chr1	33965125	34365495	ENSMUSG00000026131.9	Dst	+	10
chr1	34182727	34182743	cluster:15596	43	+	chr1	33965125	34365495	ENSMUSG00000026131.9	Dst	+	16
chr1	34219899	34219909	cluster:15838	86	+	chr1	33965125	34365495	ENSMUSG00000026131.9	Dst	+	10
chr1	34221980	34221993	cluster:15849	65	+	chr1	33965125	34365495	ENSMUSG00000026131.9	Dst	+	13
chr1	34226661	34226666	cluster:15883	105	+	chr1	33965125	34365495	ENSMUSG00000026131.9	Dst	+	5
chr1	34231055	34231060	cluster:15923	82	+	chr1	33965125	34365495	ENSMUSG00000026131.9	Dst	+	5
chr1	34231561	34231572	cluster:15930	96	+	chr1	33965125	34365495	ENSMUSG00000026131.9	Dst	+	11
chr1	34231611	34231620	cluster:15932	76	+	chr1	33965125	34365495	ENSMUSG00000026131.9	Dst	+	9
chr1	34231732	34231736	cluster:15935	41	+	chr1	33965125	34365495	ENSMUSG00000026131.9	Dst	+	4
chr1	34233152	34233160	cluster:15958	114	+	chr1	33965125	34365495	ENSMUSG00000026131.9	Dst	+	8
chr1	34237560	34237572	cluster:16013	45	+	chr1	33965125	34365495	ENSMUSG00000026131.9	Dst	+	12
chr1	34238571	34238587	cluster:16025	131	+	chr1	33965125	34365495	ENSMUSG00000026131.9	Dst	+	16
chr1	34243720	34243728	cluster:16084	66	+	chr1	33965125	34365495	ENSMUSG00000026131.9	Dst	+	8
chr1	34243983	34244003	cluster:16089	56	+	chr1	33965125	34365495	ENSMUSG00000026131.9	Dst	+	20
chr1	34244605	34244612	cluster:16105	147	+	chr1	33965125	34365495	ENSMUSG00000026131.9	Dst	+	7
chr1	34245148	34245157	cluster:16116	76	+	chr1	33965125	34365495	ENSMUSG00000026131.9	Dst	+	9
chr1	34246328	34246349	cluster:16142	64	+	chr1	33965125	34365495	ENSMUSG00000026131.9	Dst	+	21
chr1	34246928	34246946	cluster:16158	192	+	chr1	33965125	34365495	ENSMUSG00000026131.9	Dst	+	18
chr1	34246961	34246977	cluster:16159	155	+	chr1	33965125	34365495	ENSMUSG00000026131.9	Dst	+	16
chr1	34247597	34247611	cluster:16177	117	+	chr1	33965125	34365495	ENSMUSG00000026131.9	Dst	+	14
chr1	34247783	34247802	cluster:16183	143	+	chr1	33965125	34365495	ENSMUSG00000026131.9	Dst	+	19
chr1	34247879	34247881	cluster:16186	103	+	chr1	33965125	34365495	ENSMUSG00000026131.9	Dst	+	2
chr1	34247930	34247937	cluster:16188	250	+	chr1	33965125	34365495	ENSMUSG00000026131.9	Dst	+	7
chr1	34248496	34248509	cluster:16206	111	+	chr1	33965125	34365495	ENSMUSG00000026131.9	Dst	+	13
chr1	34249550	34249563	cluster:16234	61	+	chr1	33965125	34365495	ENSMUSG00000026131.9	Dst	+	13
chr1	34253000	34253015	cluster:16280	99	+	chr1	33965125	34365495	ENSMUSG00000026131.9	Dst	+	15
chr1	34253618	34253622	cluster:16294	38	+	chr1	33965125	34365495	ENSMUSG00000026131.9	Dst	+	4
chr1	34269128	34269146	cluster:16390	99	+	chr1	33965125	34365495	ENSMUSG00000026131.9	Dst	+	18
chr1	34269356	34269360	cluster:16395	125	+	chr1	33965125	34365495	ENSMUSG00000026131.9	Dst	+	4
chr1	34280651	34280656	cluster:16462	132	+	chr1	33965125	34365495	ENSMUSG00000026131.9	Dst	+	5
chr1	34284666	34284686	cluster:16484	71	+	chr1	33965125	34365495	ENSMUSG00000026131.9	Dst	+	20
chr1	34293773	34293783	cluster:16578	107	+	chr1	33965125	34365495	ENSMUSG00000026131.9	Dst	+	10
chr1	34293980	34293993	cluster:16583	71	+	chr1	33965125	34365495	ENSMUSG00000026131.9	Dst	+	13
chr1	34306364	34306368	cluster:16662	106	+	chr1	33965125	34365495	ENSMUSG00000026131.9	Dst	+	4
chr1	34319022	34319029	cluster:16744	74	+	chr1	33965125	34365495	ENSMUSG00000026131.9	Dst	+	7
chr1	34325599	34325606	cluster:16791	62	+	chr1	33965125	34365495	ENSMUSG00000026131.9	Dst	+	7
chr1	34332521	34332527	cluster:16825	31	+	chr1	33965125	34365495	ENSMUSG00000026131.9	Dst	+	6
chr1	34332554	34332581	cluster:16826	52	+	chr1	33965125	34365495	ENSMUSG00000026131.9	Dst	+	27
chr1	34352065	34352082	cluster:16922	183	+	chr1	33965125	34365495	ENSMUSG00000026131.9	Dst	+	17
chr1	34352129	34352141	cluster:16924	78	+	chr1	33965125	34365495	ENSMUSG00000026131.9	Dst	+	12
chr1	34500238	34500250	cluster:17083	36	+	chr1	34496696	34502581	ENSMUSG00000026127.7	Imp4	+	12
chr1	34500648	34500670	cluster:17089	174	+	chr1	34496696	34502581	ENSMUSG00000026127.7	Imp4	+	22
chr1	34501204	34501208	cluster:17099	119	+	chr1	34496696	34502581	ENSMUSG00000026127.7	Imp4	+	4
chr1	34870343	34870370	cluster:17264	58	-	chr1	34870064	34899910	ENSMUSG00000037503.6	Fam168b	-	27
chr1	34872542	34872553	cluster:17311	50	-	chr1	34870064	34899910	ENSMUSG00000037503.6	Fam168b	-	11
chr1	34884829	34884835	cluster:17388	65	-	chr1	34870064	34899910	ENSMUSG00000037503.6	Fam168b	-	6
chr1	34885561	34885564	cluster:17393	45	-	chr1	34870064	34899910	ENSMUSG00000037503.6	Fam168b	-	3
chr1	34893612	34893621	cluster:17427	66	-	chr1	34870064	34899910	ENSMUSG00000037503.6	Fam168b	-	9
chr1	34893635	34893643	cluster:17428	108	-	chr1	34870064	34899910	ENSMUSG00000037503.6	Fam168b	-	8
chr1	36126931	36126948	cluster:17787	79	+	chr1	36125245	36163291	ENSMUSG00000045216.6	Hs6st1	+	17
chr1	36127702	36127706	cluster:17798	78	+	chr1	36125245	36163291	ENSMUSG00000045216.6	Hs6st1	+	4
chr1	36128557	36128571	cluster:17808	152	+	chr1	36125245	36163291	ENSMUSG00000045216.6	Hs6st1	+	14
chr1	36139702	36139715	cluster:17907	42	+	chr1	36125245	36163291	ENSMUSG00000045216.6	Hs6st1	+	13
chr1	36212293	36212305	cluster:18181	82	-	chr1	36198375	36301150	ENSMUSG00000037470.8	Uggt1	-	12
chr1	36230981	36231004	cluster:18288	68	-	chr1	36198375	36301150	ENSMUSG00000037470.8	Uggt1	-	23
chr1	36233376	36233382	cluster:18310	77	-	chr1	36198375	36301150	ENSMUSG00000037470.8	Uggt1	-	6
chr1	36256079	36256089	cluster:18394	125	-	chr1	36198375	36301150	ENSMUSG00000037470.8	Uggt1	-	10
chr1	36392851	36392860	cluster:18598	83	-	chr1	36392575	36426026	ENSMUSG00000010453.5	4632411B12Rik	-	9
chr1	36394212	36394224	cluster:18618	74	-	chr1	36392575	36426026	ENSMUSG00000010453.5	4632411B12Rik	-	12
chr1	36404937	36404942	cluster:18680	56	-	chr1	36392575	36426026	ENSMUSG00000010453.5	4632411B12Rik	-	5
chr1	36410452	36410464	cluster:18711	41	-	chr1	36392575	36426026	ENSMUSG00000010453.5	4632411B12Rik	-	12
chr1	36495875	36495892	cluster:18941	59	-	chr1	36478910	36502116	ENSMUSG00000001143.7	Lman2l	-	17
chr1	36570070	36570102	cluster:19025	156	+	chr1	36568712	36585082	ENSMUSG00000001138.7	Cnnm3	+	32
chr1	36756145	36756168	cluster:19511	173	-	chr1	36756047	36771267	ENSMUSG00000037351.3	Actr1b	-	23
chr1	36756650	36756662	cluster:19524	172	-	chr1	36756047	36771267	ENSMUSG00000037351.3	Actr1b	-	12
chr1	36756903	36756905	cluster:19531	59	-	chr1	36756047	36771267	ENSMUSG00000037351.3	Actr1b	-	2
chr1	36763770	36763772	cluster:19594	69	-	chr1	36756047	36771267	ENSMUSG00000037351.3	Actr1b	-	2
chr1	36849303	36849308	cluster:19644	61	-	chr1	36849036	36996372	ENSMUSG00000026116.5	Tmem131	-	5
chr1	36856370	36856381	cluster:19725	137	-	chr1	36849036	36996372	ENSMUSG00000026116.5	Tmem131	-	11
chr1	36857518	36857526	cluster:19733	31	-	chr1	36849036	36996372	ENSMUSG00000026116.5	Tmem131	-	8
chr1	36869011	36869025	cluster:19823	84	-	chr1	36849036	36996372	ENSMUSG00000026116.5	Tmem131	-	14
chr1	36869520	36869525	cluster:19831	63	-	chr1	36849036	36996372	ENSMUSG00000026116.5	Tmem131	-	5
chr1	36875175	36875190	cluster:19882	95	-	chr1	36849036	36996372	ENSMUSG00000026116.5	Tmem131	-	15
chr1	36875942	36875953	cluster:19893	84	-	chr1	36849036	36996372	ENSMUSG00000026116.5	Tmem131	-	11
chr1	36882295	36882304	cluster:19940	78	-	chr1	36849036	36996372	ENSMUSG00000026116.5	Tmem131	-	9
chr1	36883957	36883973	cluster:19968	85	-	chr1	36849036	36996372	ENSMUSG00000026116.5	Tmem131	-	16
chr1	36889716	36889722	cluster:20023	57	-	chr1	36849036	36996372	ENSMUSG00000026116.5	Tmem131	-	6
chr1	36891516	36891528	cluster:20043	68	-	chr1	36849036	36996372	ENSMUSG00000026116.5	Tmem131	-	12
chr1	36898478	36898480	cluster:20086	65	-	chr1	36849036	36996372	ENSMUSG00000026116.5	Tmem131	-	2
chr1	36911702	36911722	cluster:20160	120	-	chr1	36849036	36996372	ENSMUSG00000026116.5	Tmem131	-	20
chr1	36924852	36924863	cluster:20246	60	-	chr1	36849036	36996372	ENSMUSG00000026116.5	Tmem131	-	11
chr1	36929404	36929415	cluster:20300	46	-	chr1	36849036	36996372	ENSMUSG00000026116.5	Tmem131	-	11
chr1	36968992	36969009	cluster:20556	54	-	chr1	36849036	36996372	ENSMUSG00000026116.5	Tmem131	-	17
chr1	36976246	36976257	cluster:20646	61	-	chr1	36849036	36996372	ENSMUSG00000026116.5	Tmem131	-	11
chr1	36977945	36977954	cluster:20670	74	-	chr1	36849036	36996372	ENSMUSG00000026116.5	Tmem131	-	9
chr1	36980203	36980229	cluster:20698	100	-	chr1	36849036	36996372	ENSMUSG00000026116.5	Tmem131	-	26
chr1	36982002	36982013	cluster:20713	58	-	chr1	36849036	36996372	ENSMUSG00000026116.5	Tmem131	-	11
chr1	36986786	36986805	cluster:20759	59	-	chr1	36849036	36996372	ENSMUSG00000026116.5	Tmem131	-	19
chr1	36990958	36990970	cluster:20798	68	-	chr1	36849036	36996372	ENSMUSG00000026116.5	Tmem131	-	12
chr1	36994272	36994281	cluster:20841	85	-	chr1	36849036	36996372	ENSMUSG00000026116.5	Tmem131	-	9
chr1	36995186	36995198	cluster:20855	78	-	chr1	36849036	36996372	ENSMUSG00000026116.5	Tmem131	-	12
chr1	37475418	37475426	cluster:21223	56	-	chr1	37473929	37486948	ENSMUSG00000026112.6	6330578E17Rik	-	8
chr1	37475440	37475456	cluster:21224	104	-	chr1	37473929	37486948	ENSMUSG00000026112.6	6330578E17Rik	-	16
chr1	37488330	37488339	cluster:21268	46	+	chr1	37487015	37495969	ENSMUSG00000026111.9	Unc50	+	9
chr1	37955128	37955138	cluster:21690	29	+	chr1	37947322	37955380	ENSMUSG00000026087.5	Mrpl30	+	10
chr1	38055066	38055084	cluster:21764	122	+	chr1	38054855	38112424	ENSMUSG00000026083.7	Eif5b	+	18
chr1	38094081	38094112	cluster:21927	98	+	chr1	38054855	38112424	ENSMUSG00000026083.7	Eif5b	+	31
chr1	38106021	38106066	cluster:21992	115	+	chr1	38054855	38112424	ENSMUSG00000026083.7	Eif5b	+	45
chr1	38108683	38108721	cluster:22047	123	+	chr1	38054855	38112424	ENSMUSG00000026083.7	Eif5b	+	38
chr1	38110244	38110255	cluster:22076	78	-	chr1	38109632	38186507	ENSMUSG00000026082.6	Rev1	-	11
chr1	38112161	38112169	cluster:22095	106	-	chr1	38109632	38186507	ENSMUSG00000026082.6	Rev1	-	8
chr1	38113250	38113261	cluster:22113	54	-	chr1	38109632	38186507	ENSMUSG00000026082.6	Rev1	-	11
chr1	38128243	38128265	cluster:22214	150	-	chr1	38109632	38186507	ENSMUSG00000026082.6	Rev1	-	22
chr1	38140571	38140590	cluster:22354	64	-	chr1	38109632	38186507	ENSMUSG00000026082.6	Rev1	-	19
chr1	38141587	38141602	cluster:22364	81	-	chr1	38109632	38186507	ENSMUSG00000026082.6	Rev1	-	15
chr1	38144602	38144614	cluster:22414	41	-	chr1	38109632	38186507	ENSMUSG00000026082.6	Rev1	-	12
chr1	38155346	38155350	cluster:22496	25	-	chr1	38109632	38186507	ENSMUSG00000026082.6	Rev1	-	4
chr1	39426244	39426250	cluster:23398	49	+	chr1	39424696	39428753	ENSMUSG00000073702.4	Rpl31	+	6
chr1	39608270	39608290	cluster:23710	54	-	chr1	39604415	39608847	ENSMUSG00000085894.1	Gm15832	-	20
chr1	39608270	39608290	cluster:23710	54	-	chr1	39608141	39634250	ENSMUSG00000048234.8	Rnf149	-	20
chr1	39959585	39959598	cluster:23984	50	+	chr1	39957758	40083155	ENSMUSG00000026074.7	Map4k4	+	13
chr1	39961375	39961388	cluster:24002	67	+	chr1	39957758	40083155	ENSMUSG00000026074.7	Map4k4	+	13
chr1	39961566	39961582	cluster:24004	69	+	chr1	39957758	40083155	ENSMUSG00000026074.7	Map4k4	+	16
chr1	40040032	40040052	cluster:24548	233	+	chr1	39957758	40083155	ENSMUSG00000026074.7	Map4k4	+	20
chr1	40040069	40040088	cluster:24549	76	+	chr1	39957758	40083155	ENSMUSG00000026074.7	Map4k4	+	19
chr1	40047068	40047071	cluster:24597	95	+	chr1	39957758	40083155	ENSMUSG00000026074.7	Map4k4	+	3
chr1	40053866	40053877	cluster:24635	70	+	chr1	39957758	40083155	ENSMUSG00000026074.7	Map4k4	+	11
chr1	40053991	40054013	cluster:24638	119	+	chr1	39957758	40083155	ENSMUSG00000026074.7	Map4k4	+	22
chr1	40071000	40071011	cluster:24794	59	+	chr1	39957758	40083155	ENSMUSG00000026074.7	Map4k4	+	11
chr1	40079567	40079578	cluster:24843	72	+	chr1	39957758	40083155	ENSMUSG00000026074.7	Map4k4	+	11
chr1	40081239	40081251	cluster:24860	193	+	chr1	39957758	40083155	ENSMUSG00000026074.7	Map4k4	+	12
chr1	40081691	40081702	cluster:24869	48	+	chr1	39957758	40083155	ENSMUSG00000026074.7	Map4k4	+	11
chr1	40081739	40081743	cluster:24871	69	+	chr1	39957758	40083155	ENSMUSG00000026074.7	Map4k4	+	4
chr1	40082076	40082089	cluster:24878	42	+	chr1	39957758	40083155	ENSMUSG00000026074.7	Map4k4	+	13
chr1	40082237	40082256	cluster:24882	170	+	chr1	39957758	40083155	ENSMUSG00000026074.7	Map4k4	+	19
chr1	40082308	40082323	cluster:24884	55	+	chr1	39957758	40083155	ENSMUSG00000026074.7	Map4k4	+	15
chr1	42934471	42934479	cluster:25509	36	+	chr1	42908078	42962527	ENSMUSG00000060679.7	Mrps9	+	8
chr1	42953187	42953192	cluster:25633	100	+	chr1	42908078	42962527	ENSMUSG00000060679.7	Mrps9	+	5
chr1	43171843	43171859	cluster:25877	75	+	chr1	43155555	43172792	ENSMUSG00000010290.7	AI597479	+	16
chr1	43172074	43172098	cluster:25881	123	+	chr1	43155555	43172792	ENSMUSG00000010290.7	AI597479	+	24
chr1	44025596	44025607	cluster:26638	36	+	chr1	43990847	44059844	ENSMUSG00000041763.7	Tpp2	+	11
chr1	44035335	44035344	cluster:26712	88	+	chr1	43990847	44059844	ENSMUSG00000041763.7	Tpp2	+	9
chr1	44037408	44037418	cluster:26721	84	+	chr1	43990847	44059844	ENSMUSG00000041763.7	Tpp2	+	10
chr1	44058986	44058994	cluster:26861	73	+	chr1	43990847	44059844	ENSMUSG00000041763.7	Tpp2	+	8
chr1	44159233	44159236	cluster:26974	160	-	chr1	44143458	44159286	ENSMUSG00000026049.5	1700029F09Rik	-	3
chr1	44159233	44159236	cluster:26974	160	-	chr1	44148308	44175653	ENSMUSG00000026047.7	Kdelc1	-	3
chr1	45855944	45855948	cluster:27515	65	+	chr1	45852011	45880464	ENSMUSG00000025995.9	Wdr75	+	4
chr1	45857146	45857155	cluster:27530	74	+	chr1	45852011	45880464	ENSMUSG00000025995.9	Wdr75	+	9
chr1	45858887	45858902	cluster:27545	113	+	chr1	45852011	45880464	ENSMUSG00000025995.9	Wdr75	+	15
chr1	45859559	45859576	cluster:27560	69	+	chr1	45852011	45880464	ENSMUSG00000025995.9	Wdr75	+	17
chr1	45861481	45861486	cluster:27587	52	+	chr1	45852011	45880464	ENSMUSG00000025995.9	Wdr75	+	5
chr1	45876395	45876414	cluster:27714	99	+	chr1	45852011	45880464	ENSMUSG00000025995.9	Wdr75	+	19
chr1	45876430	45876443	cluster:27715	212	+	chr1	45852011	45880464	ENSMUSG00000025995.9	Wdr75	+	13
chr1	45877817	45877832	cluster:27730	58	+	chr1	45852011	45880464	ENSMUSG00000025995.9	Wdr75	+	15
chr1	45879762	45879790	cluster:27742	41	+	chr1	45852011	45880464	ENSMUSG00000025995.9	Wdr75	+	28
chr1	46866107	46866123	cluster:27900	71	-	chr1	46864389	46910891	ENSMUSG00000025986.5	Slc39a10	-	16
chr1	46882959	46882982	cluster:27963	69	-	chr1	46864389	46910891	ENSMUSG00000025986.5	Slc39a10	-	23
chr1	46889457	46889466	cluster:27998	44	-	chr1	46864389	46910891	ENSMUSG00000025986.5	Slc39a10	-	9
chr1	46892111	46892130	cluster:28008	108	-	chr1	46864389	46910891	ENSMUSG00000025986.5	Slc39a10	-	19
chr1	46892236	46892248	cluster:28010	148	-	chr1	46864389	46910891	ENSMUSG00000025986.5	Slc39a10	-	12
chr1	51531413	51531427	cluster:28842	124	-	chr1	51526342	51535243	ENSMUSG00000026107.5	Obfc2a	-	14
chr1	51877011	51877030	cluster:29148	81	-	chr1	51806609	51972915	ENSMUSG00000018417.8	Myo1b	-	19
chr1	52242274	52242279	cluster:29524	76	-	chr1	52220292	52290076	ENSMUSG00000026103.8	Gls	-	5
chr1	52242695	52242703	cluster:29535	36	-	chr1	52220292	52290076	ENSMUSG00000026103.8	Gls	-	8
chr1	52243001	52243010	cluster:29540	64	-	chr1	52220292	52290076	ENSMUSG00000026103.8	Gls	-	9
chr1	52243302	52243324	cluster:29547	43	-	chr1	52220292	52290076	ENSMUSG00000026103.8	Gls	-	22
chr1	52243389	52243393	cluster:29548	83	-	chr1	52220292	52290076	ENSMUSG00000026103.8	Gls	-	4
chr1	52243469	52243510	cluster:29551	277	-	chr1	52220292	52290076	ENSMUSG00000026103.8	Gls	-	41
chr1	52243561	52243593	cluster:29553	214	-	chr1	52220292	52290076	ENSMUSG00000026103.8	Gls	-	32
chr1	52246279	52246282	cluster:29598	72	-	chr1	52220292	52290076	ENSMUSG00000026103.8	Gls	-	3
chr1	52252729	52252739	cluster:29647	96	-	chr1	52220292	52290076	ENSMUSG00000026103.8	Gls	-	10
chr1	52254488	52254496	cluster:29669	61	-	chr1	52220292	52290076	ENSMUSG00000026103.8	Gls	-	8
chr1	52256976	52256992	cluster:29704	53	-	chr1	52220292	52290076	ENSMUSG00000026103.8	Gls	-	16
chr1	52257682	52257695	cluster:29721	90	-	chr1	52220292	52290076	ENSMUSG00000026103.8	Gls	-	13
chr1	52257926	52257951	cluster:29728	156	-	chr1	52220292	52290076	ENSMUSG00000026103.8	Gls	-	25
chr1	52258042	52258072	cluster:29730	49	-	chr1	52220292	52290076	ENSMUSG00000026103.8	Gls	-	30
chr1	52258272	52258280	cluster:29737	87	-	chr1	52220292	52290076	ENSMUSG00000026103.8	Gls	-	8
chr1	52258388	52258396	cluster:29738	43	-	chr1	52220292	52290076	ENSMUSG00000026103.8	Gls	-	8
chr1	52258946	52258957	cluster:29750	57	-	chr1	52220292	52290076	ENSMUSG00000026103.8	Gls	-	11
chr1	52259594	52259610	cluster:29765	55	-	chr1	52220292	52290076	ENSMUSG00000026103.8	Gls	-	16
chr1	52259633	52259692	cluster:29766	155	-	chr1	52220292	52290076	ENSMUSG00000026103.8	Gls	-	59
chr1	52259753	52259765	cluster:29769	66	-	chr1	52220292	52290076	ENSMUSG00000026103.8	Gls	-	12
chr1	52261518	52261521	cluster:29808	47	-	chr1	52220292	52290076	ENSMUSG00000026103.8	Gls	-	3
chr1	52262514	52262522	cluster:29826	63	-	chr1	52220292	52290076	ENSMUSG00000026103.8	Gls	-	8
chr1	52263236	52263240	cluster:29841	56	-	chr1	52220292	52290076	ENSMUSG00000026103.8	Gls	-	4
chr1	52263756	52263763	cluster:29854	97	-	chr1	52220292	52290076	ENSMUSG00000026103.8	Gls	-	7
chr1	52263817	52263832	cluster:29856	80	-	chr1	52220292	52290076	ENSMUSG00000026103.8	Gls	-	15
chr1	52264002	52264016	cluster:29861	77	-	chr1	52220292	52290076	ENSMUSG00000026103.8	Gls	-	14
chr1	52269141	52269152	cluster:29906	57	-	chr1	52220292	52290076	ENSMUSG00000026103.8	Gls	-	11
chr1	52270319	52270351	cluster:29919	60	-	chr1	52220292	52290076	ENSMUSG00000026103.8	Gls	-	32
chr1	52276391	52276403	cluster:29988	49	-	chr1	52220292	52290076	ENSMUSG00000026103.8	Gls	-	12
chr1	52288930	52288943	cluster:30082	184	-	chr1	52220292	52290076	ENSMUSG00000026103.8	Gls	-	13
chr1	52708282	52708294	cluster:30345	133	+	chr1	52687549	52708763	ENSMUSG00000043015.8	Tmem194b	+	12
chr1	53218553	53218559	cluster:30775	67	-	chr1	53215421	53244461	ENSMUSG00000060715.3	1700019A02Rik	-	6
chr1	53371786	53371798	cluster:31128	67	+	chr1	53370468	53383187	ENSMUSG00000026096.7	Osgepl1	+	12
chr1	53404896	53404922	cluster:31228	81	-	chr1	53382351	53409596	ENSMUSG00000026095.6	Asnsd1	-	26
chr1	54577193	54577196	cluster:31922	76	-	chr1	54537550	54614526	ENSMUSG00000070889.4	Pgap1	-	3
chr1	55043981	55043988	cluster:32206	41	-	chr1	55042013	55084322	ENSMUSG00000025982.7	Sf3b1	-	7
chr1	55044050	55044058	cluster:32208	48	-	chr1	55042013	55084322	ENSMUSG00000025982.7	Sf3b1	-	8
chr1	55044145	55044169	cluster:32210	174	-	chr1	55042013	55084322	ENSMUSG00000025982.7	Sf3b1	-	24
chr1	55044252	55044293	cluster:32213	341	-	chr1	55042013	55084322	ENSMUSG00000025982.7	Sf3b1	-	41
chr1	55044839	55044861	cluster:32218	96	-	chr1	55042013	55084322	ENSMUSG00000025982.7	Sf3b1	-	22
chr1	55044893	55044907	cluster:32219	90	-	chr1	55042013	55084322	ENSMUSG00000025982.7	Sf3b1	-	14
chr1	55053667	55053672	cluster:32307	63	-	chr1	55042013	55084322	ENSMUSG00000025982.7	Sf3b1	-	5
chr1	55054964	55054977	cluster:32324	166	-	chr1	55042013	55084322	ENSMUSG00000025982.7	Sf3b1	-	13
chr1	55055024	55055052	cluster:32326	178	-	chr1	55042013	55084322	ENSMUSG00000025982.7	Sf3b1	-	28
chr1	55056948	55056963	cluster:32343	66	-	chr1	55042013	55084322	ENSMUSG00000025982.7	Sf3b1	-	15
chr1	55057198	55057207	cluster:32349	113	-	chr1	55042013	55084322	ENSMUSG00000025982.7	Sf3b1	-	9
chr1	55057590	55057600	cluster:32358	80	-	chr1	55042013	55084322	ENSMUSG00000025982.7	Sf3b1	-	10
chr1	55057739	55057746	cluster:32363	56	-	chr1	55042013	55084322	ENSMUSG00000025982.7	Sf3b1	-	7
chr1	55058259	55058276	cluster:32370	60	-	chr1	55042013	55084322	ENSMUSG00000025982.7	Sf3b1	-	17
chr1	55058369	55058402	cluster:32375	178	-	chr1	55042013	55084322	ENSMUSG00000025982.7	Sf3b1	-	33
chr1	55059972	55059984	cluster:32384	159	-	chr1	55042013	55084322	ENSMUSG00000025982.7	Sf3b1	-	12
chr1	55060254	55060277	cluster:32392	82	-	chr1	55042013	55084322	ENSMUSG00000025982.7	Sf3b1	-	23
chr1	55060289	55060331	cluster:32393	224	-	chr1	55042013	55084322	ENSMUSG00000025982.7	Sf3b1	-	42
chr1	55063217	55063233	cluster:32428	72	-	chr1	55042013	55084322	ENSMUSG00000025982.7	Sf3b1	-	16
chr1	55069058	55069073	cluster:32467	141	-	chr1	55042013	55084322	ENSMUSG00000025982.7	Sf3b1	-	15
chr1	55071358	55071369	cluster:32480	37	-	chr1	55042013	55084322	ENSMUSG00000025982.7	Sf3b1	-	11
chr1	55071846	55071864	cluster:32490	81	-	chr1	55042013	55084322	ENSMUSG00000025982.7	Sf3b1	-	18
chr1	55072142	55072145	cluster:32496	71	-	chr1	55042013	55084322	ENSMUSG00000025982.7	Sf3b1	-	3
chr1	55072892	55072903	cluster:32512	47	-	chr1	55042013	55084322	ENSMUSG00000025982.7	Sf3b1	-	11
chr1	55073648	55073656	cluster:32523	55	-	chr1	55042013	55084322	ENSMUSG00000025982.7	Sf3b1	-	8
chr1	55076112	55076142	cluster:32533	249	-	chr1	55042013	55084322	ENSMUSG00000025982.7	Sf3b1	-	30
chr1	55136026	55136043	cluster:32664	29	-	chr1	55134679	55145087	ENSMUSG00000025980.8	Hspd1	-	17
chr1	55136318	55136347	cluster:32669	108	-	chr1	55134679	55145087	ENSMUSG00000025980.8	Hspd1	-	29
chr1	55136825	55136835	cluster:32674	109	-	chr1	55134679	55145087	ENSMUSG00000025980.8	Hspd1	-	10
chr1	55136989	55137009	cluster:32679	139	-	chr1	55134679	55145087	ENSMUSG00000025980.8	Hspd1	-	20
chr1	55137223	55137241	cluster:32681	94	-	chr1	55134679	55145087	ENSMUSG00000025980.8	Hspd1	-	18
chr1	55137526	55137549	cluster:32687	89	-	chr1	55134679	55145087	ENSMUSG00000025980.8	Hspd1	-	23
chr1	55137642	55137646	cluster:32689	72	-	chr1	55134679	55145087	ENSMUSG00000025980.8	Hspd1	-	4
chr1	55137928	55137949	cluster:32692	300	-	chr1	55134679	55145087	ENSMUSG00000025980.8	Hspd1	-	21
chr1	55138606	55138624	cluster:32704	95	-	chr1	55134679	55145087	ENSMUSG00000025980.8	Hspd1	-	18
chr1	55139742	55139760	cluster:32723	126	-	chr1	55134679	55145087	ENSMUSG00000025980.8	Hspd1	-	18
chr1	55141306	55141338	cluster:32740	159	-	chr1	55134679	55145087	ENSMUSG00000025980.8	Hspd1	-	32
chr1	55141511	55141536	cluster:32743	83	-	chr1	55134679	55145087	ENSMUSG00000025980.8	Hspd1	-	25
chr1	55142144	55142153	cluster:32756	56	-	chr1	55134679	55145087	ENSMUSG00000025980.8	Hspd1	-	9
chr1	55142720	55142757	cluster:32766	174	-	chr1	55134679	55145087	ENSMUSG00000025980.8	Hspd1	-	37
chr1	55143457	55143495	cluster:32784	104	-	chr1	55134679	55145087	ENSMUSG00000025980.8	Hspd1	-	38
chr1	55143544	55143552	cluster:32787	81	-	chr1	55134679	55145087	ENSMUSG00000025980.8	Hspd1	-	8
chr1	55143660	55143717	cluster:32790	202	-	chr1	55134679	55145087	ENSMUSG00000025980.8	Hspd1	-	57
chr1	55144065	55144073	cluster:32799	61	-	chr1	55134679	55145087	ENSMUSG00000025980.8	Hspd1	-	8
chr1	55144112	55144117	cluster:32800	94	-	chr1	55134679	55145087	ENSMUSG00000025980.8	Hspd1	-	5
chr1	55144301	55144324	cluster:32805	204	-	chr1	55134679	55145087	ENSMUSG00000025980.8	Hspd1	-	23
chr1	55144654	55144689	cluster:32812	91	-	chr1	55134679	55145087	ENSMUSG00000025980.8	Hspd1	-	35
chr1	55145184	55145211	cluster:32818	282	+	chr1	55144976	55148151	ENSMUSG00000073676.4	Hspe1	+	27
chr1	55145929	55145951	cluster:32826	138	+	chr1	55144976	55148151	ENSMUSG00000073676.4	Hspe1	+	22
chr1	55146966	55146969	cluster:32838	137	+	chr1	55144976	55148151	ENSMUSG00000073676.4	Hspe1	+	3
chr1	55209622	55209628	cluster:32958	41	+	chr1	55188075	55211743	ENSMUSG00000025979.7	Mob4	+	6
chr1	58457993	58458023	cluster:34170	98	+	chr1	58449980	58463392	ENSMUSG00000051223.8	Bzw1	+	30
chr1	58458900	58458912	cluster:34179	125	+	chr1	58449980	58463392	ENSMUSG00000051223.8	Bzw1	+	12
chr1	58462017	58462020	cluster:34214	52	+	chr1	58449980	58463392	ENSMUSG00000051223.8	Bzw1	+	3
chr1	58462171	58462178	cluster:34216	131	+	chr1	58449980	58463392	ENSMUSG00000051223.8	Bzw1	+	7
chr1	58462669	58462693	cluster:34224	393	+	chr1	58449980	58463392	ENSMUSG00000051223.8	Bzw1	+	24
chr1	58462887	58462894	cluster:34227	71	+	chr1	58449980	58463392	ENSMUSG00000051223.8	Bzw1	+	7
chr1	58462924	58462951	cluster:34229	160	+	chr1	58449980	58463392	ENSMUSG00000051223.8	Bzw1	+	27
chr1	58469114	58469125	cluster:34268	40	-	chr1	58467033	58480910	ENSMUSG00000026034.10	Clk1	-	11
chr1	58469829	58469856	cluster:34278	70	-	chr1	58467033	58480910	ENSMUSG00000026034.10	Clk1	-	27
chr1	58470244	58470247	cluster:34288	144	-	chr1	58467033	58480910	ENSMUSG00000026034.10	Clk1	-	3
chr1	58471239	58471251	cluster:34299	47	-	chr1	58467033	58480910	ENSMUSG00000026034.10	Clk1	-	12
chr1	58472042	58472064	cluster:34311	81	-	chr1	58467033	58480910	ENSMUSG00000026034.10	Clk1	-	22
chr1	58472427	58472455	cluster:34316	163	-	chr1	58467033	58480910	ENSMUSG00000026034.10	Clk1	-	28
chr1	58472752	58472754	cluster:34320	95	-	chr1	58467033	58480910	ENSMUSG00000026034.10	Clk1	-	2
chr1	58473723	58473734	cluster:34339	56	-	chr1	58467033	58480910	ENSMUSG00000026034.10	Clk1	-	11
chr1	58474147	58474157	cluster:34350	39	-	chr1	58467033	58480910	ENSMUSG00000026034.10	Clk1	-	10
chr1	58474185	58474202	cluster:34351	173	-	chr1	58467033	58480910	ENSMUSG00000026034.10	Clk1	-	17
chr1	58474753	58474775	cluster:34356	65	-	chr1	58467033	58480910	ENSMUSG00000026034.10	Clk1	-	22
chr1	58476695	58476740	cluster:34383	348	-	chr1	58467033	58480910	ENSMUSG00000026034.10	Clk1	-	45
chr1	58476786	58476815	cluster:34385	152	-	chr1	58467033	58480910	ENSMUSG00000026034.10	Clk1	-	29
chr1	58477198	58477211	cluster:34392	91	-	chr1	58467033	58480910	ENSMUSG00000026034.10	Clk1	-	13
chr1	58477336	58477346	cluster:34397	125	-	chr1	58467033	58480910	ENSMUSG00000026034.10	Clk1	-	10
chr1	58478628	58478644	cluster:34423	68	-	chr1	58467033	58480910	ENSMUSG00000026034.10	Clk1	-	16
chr1	58478722	58478727	cluster:34424	87	-	chr1	58467033	58480910	ENSMUSG00000026034.10	Clk1	-	5
chr1	58522616	58522625	cluster:34600	75	-	chr1	58519615	58561953	ENSMUSG00000026037.8	Orc2	-	9
chr1	58522853	58522863	cluster:34602	44	-	chr1	58519615	58561953	ENSMUSG00000026037.8	Orc2	-	10
chr1	58526616	58526642	cluster:34619	119	-	chr1	58519615	58561953	ENSMUSG00000026037.8	Orc2	-	26
chr1	58549426	58549435	cluster:34715	77	-	chr1	58519615	58561953	ENSMUSG00000026037.8	Orc2	-	9
chr1	58550555	58550561	cluster:34727	56	-	chr1	58519615	58561953	ENSMUSG00000026037.8	Orc2	-	6
chr1	58643445	58643452	cluster:34972	43	+	chr1	58643228	58652808	ENSMUSG00000026032.8	Ndufb3	+	7
chr1	58648442	58648456	cluster:34994	67	+	chr1	58643228	58652808	ENSMUSG00000026032.8	Ndufb3	+	14
chr1	59540529	59540535	cluster:35685	115	+	chr1	59538991	59543791	ENSMUSG00000041075.7	Fzd7	+	6
chr1	59542261	59542270	cluster:35723	193	+	chr1	59538991	59543791	ENSMUSG00000041075.7	Fzd7	+	9
chr1	59542286	59542292	cluster:35724	148	+	chr1	59538991	59543791	ENSMUSG00000041075.7	Fzd7	+	6
chr1	59542318	59542322	cluster:35725	60	+	chr1	59538991	59543791	ENSMUSG00000041075.7	Fzd7	+	4
chr1	59542381	59542394	cluster:35727	54	+	chr1	59538991	59543791	ENSMUSG00000041075.7	Fzd7	+	13
chr1	59542421	59542425	cluster:35728	50	+	chr1	59538991	59543791	ENSMUSG00000041075.7	Fzd7	+	4
chr1	59542588	59542614	cluster:35731	92	+	chr1	59538991	59543791	ENSMUSG00000041075.7	Fzd7	+	26
chr1	59542964	59542992	cluster:35738	79	+	chr1	59538991	59543791	ENSMUSG00000041075.7	Fzd7	+	28
chr1	59543109	59543122	cluster:35741	55	+	chr1	59538991	59543791	ENSMUSG00000041075.7	Fzd7	+	13
chr1	59543354	59543373	cluster:35748	74	+	chr1	59538991	59543791	ENSMUSG00000041075.7	Fzd7	+	19
chr1	59543418	59543422	cluster:35750	29	+	chr1	59538991	59543791	ENSMUSG00000041075.7	Fzd7	+	4
chr1	59543553	59543558	cluster:35753	85	+	chr1	59538991	59543791	ENSMUSG00000041075.7	Fzd7	+	5
chr1	59543695	59543759	cluster:35757	184	+	chr1	59538991	59543791	ENSMUSG00000041075.7	Fzd7	+	64
chr1	59699627	59699644	cluster:35855	96	-	chr1	59696278	59727678	ENSMUSG00000026021.9	Sumo1	-	17
chr1	59721087	59721094	cluster:35938	37	-	chr1	59696278	59727678	ENSMUSG00000026021.9	Sumo1	-	7
chr1	59726934	59726958	cluster:35992	211	-	chr1	59696278	59727678	ENSMUSG00000026021.9	Sumo1	-	24
chr1	59741976	59741979	cluster:36016	198	+	chr1	59741853	59768968	ENSMUSG00000026020.2	Nop58	+	3
chr1	59742019	59742043	cluster:36018	176	+	chr1	59741853	59768968	ENSMUSG00000026020.2	Nop58	+	24
chr1	59743413	59743443	cluster:36034	148	+	chr1	59741853	59768968	ENSMUSG00000026020.2	Nop58	+	30
chr1	59744187	59744209	cluster:36050	117	+	chr1	59741853	59768968	ENSMUSG00000026020.2	Nop58	+	22
chr1	59746663	59746668	cluster:36083	46	+	chr1	59741853	59768968	ENSMUSG00000026020.2	Nop58	+	5
chr1	59747329	59747350	cluster:36095	123	+	chr1	59741853	59768968	ENSMUSG00000026020.2	Nop58	+	21
chr1	59748407	59748416	cluster:36118	69	+	chr1	59741853	59768968	ENSMUSG00000026020.2	Nop58	+	9
chr1	59748753	59748764	cluster:36128	104	+	chr1	59741853	59768968	ENSMUSG00000026020.2	Nop58	+	11
chr1	59748872	59748890	cluster:36130	73	+	chr1	59741853	59768968	ENSMUSG00000026020.2	Nop58	+	18
chr1	59749174	59749213	cluster:36134	177	+	chr1	59741853	59768968	ENSMUSG00000026020.2	Nop58	+	39
chr1	59749313	59749329	cluster:36138	120	+	chr1	59741853	59768968	ENSMUSG00000026020.2	Nop58	+	16
chr1	59749349	59749403	cluster:36139	550	+	chr1	59741853	59768968	ENSMUSG00000026020.2	Nop58	+	54
chr1	59750367	59750377	cluster:36157	63	+	chr1	59741853	59768968	ENSMUSG00000026020.2	Nop58	+	10
chr1	59751240	59751263	cluster:36173	73	+	chr1	59741853	59768968	ENSMUSG00000026020.2	Nop58	+	23
chr1	59751535	59751541	cluster:36176	138	+	chr1	59741853	59768968	ENSMUSG00000026020.2	Nop58	+	6
chr1	59752823	59752842	cluster:36189	80	+	chr1	59741853	59768968	ENSMUSG00000026020.2	Nop58	+	19
chr1	59755160	59755182	cluster:36213	55	+	chr1	59741853	59768968	ENSMUSG00000026020.2	Nop58	+	22
chr1	59755230	59755256	cluster:36215	81	+	chr1	59741853	59768968	ENSMUSG00000026020.2	Nop58	+	26
chr1	59758008	59758025	cluster:36245	126	+	chr1	59741853	59768968	ENSMUSG00000026020.2	Nop58	+	17
chr1	59759658	59759671	cluster:36256	92	+	chr1	59741853	59768968	ENSMUSG00000026020.2	Nop58	+	13
chr1	59759715	59759737	cluster:36258	183	+	chr1	59741853	59768968	ENSMUSG00000026020.2	Nop58	+	22
chr1	59759748	59759763	cluster:36259	78	+	chr1	59741853	59768968	ENSMUSG00000026020.2	Nop58	+	15
chr1	59760109	59760113	cluster:36269	55	+	chr1	59741853	59768968	ENSMUSG00000026020.2	Nop58	+	4
chr1	59760902	59760938	cluster:36285	68	+	chr1	59741853	59768968	ENSMUSG00000026020.2	Nop58	+	36
chr1	59761035	59761046	cluster:36289	86	+	chr1	59741853	59768968	ENSMUSG00000026020.2	Nop58	+	11
chr1	59761102	59761160	cluster:36290	721	+	chr1	59741853	59768968	ENSMUSG00000026020.2	Nop58	+	58
chr1	59761474	59761485	cluster:36298	45	+	chr1	59741853	59768968	ENSMUSG00000026020.2	Nop58	+	11
chr1	59761635	59761658	cluster:36304	334	+	chr1	59741853	59768968	ENSMUSG00000026020.2	Nop58	+	23
chr1	59761670	59761694	cluster:36305	306	+	chr1	59741853	59768968	ENSMUSG00000026020.2	Nop58	+	24
chr1	59762495	59762529	cluster:36320	214	+	chr1	59741853	59768968	ENSMUSG00000026020.2	Nop58	+	34
chr1	59762547	59762552	cluster:36321	171	+	chr1	59741853	59768968	ENSMUSG00000026020.2	Nop58	+	5
chr1	59763538	59763550	cluster:36344	43	+	chr1	59741853	59768968	ENSMUSG00000026020.2	Nop58	+	12
chr1	59764544	59764550	cluster:36363	110	+	chr1	59741853	59768968	ENSMUSG00000026020.2	Nop58	+	6
chr1	59764561	59764596	cluster:36364	124	+	chr1	59741853	59768968	ENSMUSG00000026020.2	Nop58	+	35
chr1	59765604	59765610	cluster:36376	49	+	chr1	59741853	59768968	ENSMUSG00000026020.2	Nop58	+	6
chr1	59765743	59765767	cluster:36380	33	+	chr1	59741853	59768968	ENSMUSG00000026020.2	Nop58	+	24
chr1	59766026	59766037	cluster:36388	108	+	chr1	59741853	59768968	ENSMUSG00000026020.2	Nop58	+	11
chr1	59768156	59768178	cluster:36420	150	+	chr1	59741853	59768968	ENSMUSG00000026020.2	Nop58	+	22
chr1	59768192	59768211	cluster:36421	57	+	chr1	59741853	59768968	ENSMUSG00000026020.2	Nop58	+	19
chr1	59768247	59768264	cluster:36422	76	+	chr1	59741853	59768968	ENSMUSG00000026020.2	Nop58	+	17
chr1	59768747	59768775	cluster:36431	70	+	chr1	59741853	59768968	ENSMUSG00000026020.2	Nop58	+	28
chr1	60005936	60005939	cluster:36877	151	+	chr1	59969850	60042190	ENSMUSG00000041040.6	Fam117b	+	3
chr1	60153369	60153380	cluster:37177	33	-	chr1	60133712	60155489	ENSMUSG00000026019.9	Wdr12	-	11
chr1	60237562	60237568	cluster:37266	180	+	chr1	60237443	60395172	ENSMUSG00000073664.4	Nbeal1	+	6
chr1	60238409	60238426	cluster:37272	143	+	chr1	60237443	60395172	ENSMUSG00000073664.4	Nbeal1	+	17
chr1	60391873	60391876	cluster:37730	52	+	chr1	60237443	60395172	ENSMUSG00000073664.4	Nbeal1	+	3
chr1	60523109	60523111	cluster:38043	62	+	chr1	60466539	60537999	ENSMUSG00000026782.8	Abi2	+	2
chr1	60534193	60534200	cluster:38116	75	+	chr1	60466539	60537999	ENSMUSG00000026782.8	Abi2	+	7
chr1	60534626	60534634	cluster:38126	105	+	chr1	60466539	60537999	ENSMUSG00000026782.8	Abi2	+	8
chr1	60534785	60534798	cluster:38129	42	+	chr1	60466539	60537999	ENSMUSG00000026782.8	Abi2	+	13
chr1	60535618	60535638	cluster:38144	60	+	chr1	60466539	60537999	ENSMUSG00000026782.8	Abi2	+	20
chr1	60536851	60536858	cluster:38174	99	+	chr1	60466539	60537999	ENSMUSG00000026782.8	Abi2	+	7
chr1	60537055	60537077	cluster:38179	103	+	chr1	60466539	60537999	ENSMUSG00000026782.8	Abi2	+	22
chr1	60541598	60541611	cluster:38237	50	-	chr1	60540080	60623948	ENSMUSG00000026014.7	Raph1	-	13
chr1	60542977	60542981	cluster:38262	105	-	chr1	60540080	60623948	ENSMUSG00000026014.7	Raph1	-	4
chr1	60543024	60543028	cluster:38263	40	-	chr1	60540080	60623948	ENSMUSG00000026014.7	Raph1	-	4
chr1	60543502	60543525	cluster:38270	136	-	chr1	60540080	60623948	ENSMUSG00000026014.7	Raph1	-	23
chr1	60582493	60582503	cluster:38502	40	-	chr1	60540080	60623948	ENSMUSG00000026014.7	Raph1	-	10
chr1	63094497	63094511	cluster:39295	55	-	chr1	63004992	63161241	ENSMUSG00000040865.8	Ino80d	-	14
chr1	63095417	63095452	cluster:39308	113	-	chr1	63004992	63161241	ENSMUSG00000040865.8	Ino80d	-	35
chr1	63097580	63097589	cluster:39342	135	-	chr1	63004992	63161241	ENSMUSG00000040865.8	Ino80d	-	9
chr1	63100376	63100395	cluster:39393	38	-	chr1	63004992	63161241	ENSMUSG00000040865.8	Ino80d	-	19
chr1	63100487	63100496	cluster:39395	35	-	chr1	63004992	63161241	ENSMUSG00000040865.8	Ino80d	-	9
chr1	63101544	63101558	cluster:39412	94	-	chr1	63004992	63161241	ENSMUSG00000040865.8	Ino80d	-	14
chr1	63102516	63102530	cluster:39427	70	-	chr1	63004992	63161241	ENSMUSG00000040865.8	Ino80d	-	14
chr1	63102759	63102788	cluster:39433	89	-	chr1	63004992	63161241	ENSMUSG00000040865.8	Ino80d	-	29
chr1	63103062	63103076	cluster:39437	92	-	chr1	63004992	63161241	ENSMUSG00000040865.8	Ino80d	-	14
chr1	63103311	63103345	cluster:39441	92	-	chr1	63004992	63161241	ENSMUSG00000040865.8	Ino80d	-	34
chr1	63103687	63103705	cluster:39450	44	-	chr1	63004992	63161241	ENSMUSG00000040865.8	Ino80d	-	18
chr1	63104851	63104863	cluster:39465	107	-	chr1	63004992	63161241	ENSMUSG00000040865.8	Ino80d	-	12
chr1	63107697	63107713	cluster:39494	169	-	chr1	63004992	63161241	ENSMUSG00000040865.8	Ino80d	-	16
chr1	63132244	63132256	cluster:39574	154	-	chr1	63004992	63161241	ENSMUSG00000040865.8	Ino80d	-	12
chr1	63142787	63142808	cluster:39639	167	-	chr1	63004992	63161241	ENSMUSG00000040865.8	Ino80d	-	21
chr1	63151376	63151393	cluster:39664	123	-	chr1	63004992	63161241	ENSMUSG00000040865.8	Ino80d	-	17
chr1	63162071	63162080	cluster:39739	50	+	chr1	63161045	63204864	ENSMUSG00000084799.1	Gm11602	+	9
chr1	63162644	63162657	cluster:39745	23	+	chr1	63161045	63204864	ENSMUSG00000084799.1	Gm11602	+	13
chr1	63190383	63190412	cluster:39856	140	-	chr1	63190170	63223396	ENSMUSG00000025968.9	Ndufs1	-	29
chr1	63197713	63197721	cluster:39888	68	-	chr1	63190170	63223396	ENSMUSG00000025968.9	Ndufs1	-	8
chr1	63198210	63198214	cluster:39892	48	-	chr1	63190170	63223396	ENSMUSG00000025968.9	Ndufs1	-	4
chr1	63210295	63210314	cluster:39969	51	-	chr1	63190170	63223396	ENSMUSG00000025968.9	Ndufs1	-	19
chr1	63211341	63211364	cluster:39975	93	-	chr1	63190170	63223396	ENSMUSG00000025968.9	Ndufs1	-	23
chr1	63211531	63211542	cluster:39979	46	-	chr1	63190170	63223396	ENSMUSG00000025968.9	Ndufs1	-	11
chr1	63216674	63216691	cluster:40007	80	-	chr1	63190170	63223396	ENSMUSG00000025968.9	Ndufs1	-	17
chr1	63223698	63223714	cluster:40053	629	+	chr1	63223399	63227060	ENSMUSG00000025967.9	Eef1b2	+	16
chr1	63223745	63223761	cluster:40055	232	+	chr1	63223399	63227060	ENSMUSG00000025967.9	Eef1b2	+	16
chr1	63223778	63223792	cluster:40056	239	+	chr1	63223399	63227060	ENSMUSG00000025967.9	Eef1b2	+	14
chr1	63223854	63223859	cluster:40059	147	+	chr1	63223399	63227060	ENSMUSG00000025967.9	Eef1b2	+	5
chr1	63224339	63224384	cluster:40070	711	+	chr1	63223399	63227060	ENSMUSG00000025967.9	Eef1b2	+	45
chr1	63224395	63224443	cluster:40071	413	+	chr1	63223399	63227060	ENSMUSG00000025967.9	Eef1b2	+	48
chr1	63225012	63225044	cluster:40085	368	+	chr1	63223399	63227060	ENSMUSG00000025967.9	Eef1b2	+	32
chr1	63225058	63225071	cluster:40086	134	+	chr1	63223399	63227060	ENSMUSG00000025967.9	Eef1b2	+	13
chr1	63225094	63225131	cluster:40088	325	+	chr1	63223399	63227060	ENSMUSG00000025967.9	Eef1b2	+	37
chr1	63225229	63225291	cluster:40090	733	+	chr1	63223399	63227060	ENSMUSG00000025967.9	Eef1b2	+	62
chr1	63225421	63225451	cluster:40093	171	+	chr1	63223399	63227060	ENSMUSG00000025967.9	Eef1b2	+	30
chr1	63225673	63225678	cluster:40100	88	+	chr1	63223399	63227060	ENSMUSG00000025967.9	Eef1b2	+	5
chr1	63225893	63225936	cluster:40103	180	+	chr1	63223399	63227060	ENSMUSG00000025967.9	Eef1b2	+	43
chr1	63226162	63226194	cluster:40105	400	+	chr1	63223399	63227060	ENSMUSG00000025967.9	Eef1b2	+	32
chr1	63330165	63330169	cluster:41115	85	+	chr1	63319839	63361150	ENSMUSG00000027520.8	Zdbf2	+	4
chr1	63333565	63333569	cluster:41142	49	+	chr1	63319839	63361150	ENSMUSG00000027520.8	Zdbf2	+	4
chr1	63335657	63335668	cluster:41164	99	+	chr1	63319839	63361150	ENSMUSG00000027520.8	Zdbf2	+	11
chr1	63335888	63335920	cluster:41166	133	+	chr1	63319839	63361150	ENSMUSG00000027520.8	Zdbf2	+	32
chr1	63336626	63336630	cluster:41176	42	+	chr1	63319839	63361150	ENSMUSG00000027520.8	Zdbf2	+	4
chr1	63339394	63339406	cluster:41203	57	+	chr1	63319839	63361150	ENSMUSG00000027520.8	Zdbf2	+	12
chr1	63340373	63340389	cluster:41215	113	+	chr1	63319839	63361150	ENSMUSG00000027520.8	Zdbf2	+	16
chr1	63348997	63349007	cluster:41278	56	+	chr1	63319839	63361150	ENSMUSG00000027520.8	Zdbf2	+	10
chr1	63349437	63349463	cluster:41285	212	+	chr1	63319839	63361150	ENSMUSG00000027520.8	Zdbf2	+	26
chr1	63349551	63349553	cluster:41289	77	+	chr1	63319839	63361150	ENSMUSG00000027520.8	Zdbf2	+	2
chr1	63349814	63349863	cluster:41294	195	+	chr1	63319839	63361150	ENSMUSG00000027520.8	Zdbf2	+	49
chr1	63349921	63349940	cluster:41297	68	+	chr1	63319839	63361150	ENSMUSG00000027520.8	Zdbf2	+	19
chr1	63350301	63350310	cluster:41306	252	+	chr1	63319839	63361150	ENSMUSG00000027520.8	Zdbf2	+	9
chr1	63350326	63350343	cluster:41307	44	+	chr1	63319839	63361150	ENSMUSG00000027520.8	Zdbf2	+	17
chr1	63350504	63350513	cluster:41312	55	+	chr1	63319839	63361150	ENSMUSG00000027520.8	Zdbf2	+	9
chr1	63350595	63350623	cluster:41315	145	+	chr1	63319839	63361150	ENSMUSG00000027520.8	Zdbf2	+	28
chr1	63350754	63350778	cluster:41319	125	+	chr1	63319839	63361150	ENSMUSG00000027520.8	Zdbf2	+	24
chr1	63350862	63350906	cluster:41322	161	+	chr1	63319839	63361150	ENSMUSG00000027520.8	Zdbf2	+	44
chr1	63350962	63350969	cluster:41324	121	+	chr1	63319839	63361150	ENSMUSG00000027520.8	Zdbf2	+	7
chr1	63351027	63351046	cluster:41327	237	+	chr1	63319839	63361150	ENSMUSG00000027520.8	Zdbf2	+	19
chr1	63351118	63351129	cluster:41329	116	+	chr1	63319839	63361150	ENSMUSG00000027520.8	Zdbf2	+	11
chr1	63351369	63351391	cluster:41337	141	+	chr1	63319839	63361150	ENSMUSG00000027520.8	Zdbf2	+	22
chr1	63351553	63351572	cluster:41343	156	+	chr1	63319839	63361150	ENSMUSG00000027520.8	Zdbf2	+	19
chr1	63351671	63351697	cluster:41347	239	+	chr1	63319839	63361150	ENSMUSG00000027520.8	Zdbf2	+	26
chr1	63351730	63351746	cluster:41349	217	+	chr1	63319839	63361150	ENSMUSG00000027520.8	Zdbf2	+	16
chr1	63351805	63351843	cluster:41352	208	+	chr1	63319839	63361150	ENSMUSG00000027520.8	Zdbf2	+	38
chr1	63352438	63352463	cluster:41371	97	+	chr1	63319839	63361150	ENSMUSG00000027520.8	Zdbf2	+	25
chr1	63352685	63352705	cluster:41378	87	+	chr1	63319839	63361150	ENSMUSG00000027520.8	Zdbf2	+	20
chr1	63352947	63352956	cluster:41388	72	+	chr1	63319839	63361150	ENSMUSG00000027520.8	Zdbf2	+	9
chr1	63353296	63353308	cluster:41399	56	+	chr1	63319839	63361150	ENSMUSG00000027520.8	Zdbf2	+	12
chr1	63353658	63353667	cluster:41408	91	+	chr1	63319839	63361150	ENSMUSG00000027520.8	Zdbf2	+	9
chr1	63353841	63353853	cluster:41414	142	+	chr1	63319839	63361150	ENSMUSG00000027520.8	Zdbf2	+	12
chr1	63354559	63354594	cluster:41436	193	+	chr1	63319839	63361150	ENSMUSG00000027520.8	Zdbf2	+	35
chr1	63354635	63354649	cluster:41438	92	+	chr1	63319839	63361150	ENSMUSG00000027520.8	Zdbf2	+	14
chr1	63354790	63354801	cluster:41443	112	+	chr1	63319839	63361150	ENSMUSG00000027520.8	Zdbf2	+	11
chr1	63354904	63354937	cluster:41445	226	+	chr1	63319839	63361150	ENSMUSG00000027520.8	Zdbf2	+	33
chr1	63354956	63354976	cluster:41446	87	+	chr1	63319839	63361150	ENSMUSG00000027520.8	Zdbf2	+	20
chr1	63355130	63355140	cluster:41449	145	+	chr1	63319839	63361150	ENSMUSG00000027520.8	Zdbf2	+	10
chr1	63355270	63355280	cluster:41455	53	+	chr1	63319839	63361150	ENSMUSG00000027520.8	Zdbf2	+	10
chr1	63355377	63355413	cluster:41460	199	+	chr1	63319839	63361150	ENSMUSG00000027520.8	Zdbf2	+	36
chr1	63356300	63356321	cluster:41482	166	+	chr1	63319839	63361150	ENSMUSG00000027520.8	Zdbf2	+	21
chr1	63356353	63356357	cluster:41483	54	+	chr1	63319839	63361150	ENSMUSG00000027520.8	Zdbf2	+	4
chr1	63356551	63356563	cluster:41491	110	+	chr1	63319839	63361150	ENSMUSG00000027520.8	Zdbf2	+	12
chr1	63356598	63356610	cluster:41493	83	+	chr1	63319839	63361150	ENSMUSG00000027520.8	Zdbf2	+	12
chr1	63356735	63356762	cluster:41497	60	+	chr1	63319839	63361150	ENSMUSG00000027520.8	Zdbf2	+	27
chr1	63356783	63356811	cluster:41498	278	+	chr1	63319839	63361150	ENSMUSG00000027520.8	Zdbf2	+	28
chr1	63356869	63356890	cluster:41501	184	+	chr1	63319839	63361150	ENSMUSG00000027520.8	Zdbf2	+	21
chr1	63356982	63357002	cluster:41504	32	+	chr1	63319839	63361150	ENSMUSG00000027520.8	Zdbf2	+	20
chr1	63357050	63357061	cluster:41507	45	+	chr1	63319839	63361150	ENSMUSG00000027520.8	Zdbf2	+	11
chr1	63357079	63357096	cluster:41508	204	+	chr1	63319839	63361150	ENSMUSG00000027520.8	Zdbf2	+	17
chr1	63357295	63357300	cluster:41514	34	+	chr1	63319839	63361150	ENSMUSG00000027520.8	Zdbf2	+	5
chr1	63357331	63357337	cluster:41516	184	+	chr1	63319839	63361150	ENSMUSG00000027520.8	Zdbf2	+	6
chr1	63357427	63357433	cluster:41520	37	+	chr1	63319839	63361150	ENSMUSG00000027520.8	Zdbf2	+	6
chr1	63357476	63357490	cluster:41521	76	+	chr1	63319839	63361150	ENSMUSG00000027520.8	Zdbf2	+	14
chr1	63357673	63357689	cluster:41526	117	+	chr1	63319839	63361150	ENSMUSG00000027520.8	Zdbf2	+	16
chr1	63357895	63357907	cluster:41529	53	+	chr1	63319839	63361150	ENSMUSG00000027520.8	Zdbf2	+	12
chr1	63357925	63357943	cluster:41530	220	+	chr1	63319839	63361150	ENSMUSG00000027520.8	Zdbf2	+	18
chr1	63357965	63357973	cluster:41531	76	+	chr1	63319839	63361150	ENSMUSG00000027520.8	Zdbf2	+	8
chr1	63358159	63358165	cluster:41537	119	+	chr1	63319839	63361150	ENSMUSG00000027520.8	Zdbf2	+	6
chr1	63358306	63358330	cluster:41542	96	+	chr1	63319839	63361150	ENSMUSG00000027520.8	Zdbf2	+	24
chr1	63358404	63358410	cluster:41545	134	+	chr1	63319839	63361150	ENSMUSG00000027520.8	Zdbf2	+	6
chr1	63358483	63358488	cluster:41549	82	+	chr1	63319839	63361150	ENSMUSG00000027520.8	Zdbf2	+	5
chr1	63358689	63358737	cluster:41554	147	+	chr1	63319839	63361150	ENSMUSG00000027520.8	Zdbf2	+	48
chr1	63359190	63359203	cluster:41562	94	+	chr1	63319839	63361150	ENSMUSG00000027520.8	Zdbf2	+	13
chr1	63359405	63359411	cluster:41566	40	+	chr1	63319839	63361150	ENSMUSG00000027520.8	Zdbf2	+	6
chr1	63359433	63359444	cluster:41567	36	+	chr1	63319839	63361150	ENSMUSG00000027520.8	Zdbf2	+	11
chr1	63359754	63359771	cluster:41575	67	+	chr1	63319839	63361150	ENSMUSG00000027520.8	Zdbf2	+	17
chr1	63359990	63360001	cluster:41583	89	+	chr1	63319839	63361150	ENSMUSG00000027520.8	Zdbf2	+	11
chr1	63360127	63360138	cluster:41588	89	+	chr1	63319839	63361150	ENSMUSG00000027520.8	Zdbf2	+	11
chr1	63360167	63360203	cluster:41589	180	+	chr1	63319839	63361150	ENSMUSG00000027520.8	Zdbf2	+	36
chr1	63360214	63360237	cluster:41590	71	+	chr1	63319839	63361150	ENSMUSG00000027520.8	Zdbf2	+	23
chr1	63360524	63360540	cluster:41594	163	+	chr1	63319839	63361150	ENSMUSG00000027520.8	Zdbf2	+	16
chr1	63494443	63494454	cluster:41708	82	+	chr1	63492465	63643089	ENSMUSG00000025964.7	Adam23	+	11
chr1	63494477	63494483	cluster:41709	77	+	chr1	63492465	63643089	ENSMUSG00000025964.7	Adam23	+	6
chr1	63494583	63494612	cluster:41710	129	+	chr1	63492465	63643089	ENSMUSG00000025964.7	Adam23	+	29
chr1	63495298	63495301	cluster:41715	62	+	chr1	63492465	63643089	ENSMUSG00000025964.7	Adam23	+	3
chr1	63497647	63497652	cluster:41746	42	+	chr1	63492465	63643089	ENSMUSG00000025964.7	Adam23	+	5
chr1	63498731	63498751	cluster:41756	34	+	chr1	63492465	63643089	ENSMUSG00000025964.7	Adam23	+	20
chr1	63499265	63499274	cluster:41764	153	+	chr1	63492465	63643089	ENSMUSG00000025964.7	Adam23	+	9
chr1	63518422	63518436	cluster:41936	113	+	chr1	63492465	63643089	ENSMUSG00000025964.7	Adam23	+	14
chr1	63523124	63523143	cluster:41969	55	+	chr1	63492465	63643089	ENSMUSG00000025964.7	Adam23	+	19
chr1	63525970	63525973	cluster:42002	94	+	chr1	63492465	63643089	ENSMUSG00000025964.7	Adam23	+	3
chr1	63527160	63527169	cluster:42016	146	+	chr1	63492465	63643089	ENSMUSG00000025964.7	Adam23	+	9
chr1	63527664	63527677	cluster:42031	97	+	chr1	63492465	63643089	ENSMUSG00000025964.7	Adam23	+	13
chr1	63533300	63533308	cluster:42110	67	+	chr1	63492465	63643089	ENSMUSG00000025964.7	Adam23	+	8
chr1	63534611	63534622	cluster:42124	48	+	chr1	63492465	63643089	ENSMUSG00000025964.7	Adam23	+	11
chr1	63534709	63534719	cluster:42127	67	+	chr1	63492465	63643089	ENSMUSG00000025964.7	Adam23	+	10
chr1	63538398	63538408	cluster:42164	97	+	chr1	63492465	63643089	ENSMUSG00000025964.7	Adam23	+	10
chr1	63553201	63553221	cluster:42329	85	+	chr1	63492465	63643089	ENSMUSG00000025964.7	Adam23	+	20
chr1	63557205	63557210	cluster:42364	25	+	chr1	63492465	63643089	ENSMUSG00000025964.7	Adam23	+	5
chr1	63557790	63557803	cluster:42372	126	+	chr1	63492465	63643089	ENSMUSG00000025964.7	Adam23	+	13
chr1	63559488	63559497	cluster:42389	48	+	chr1	63492465	63643089	ENSMUSG00000025964.7	Adam23	+	9
chr1	63565405	63565410	cluster:42432	149	+	chr1	63492465	63643089	ENSMUSG00000025964.7	Adam23	+	5
chr1	63565432	63565434	cluster:42433	37	+	chr1	63492465	63643089	ENSMUSG00000025964.7	Adam23	+	2
chr1	63576854	63576867	cluster:42504	46	+	chr1	63492465	63643089	ENSMUSG00000025964.7	Adam23	+	13
chr1	63580911	63580930	cluster:42556	115	+	chr1	63492465	63643089	ENSMUSG00000025964.7	Adam23	+	19
chr1	63581745	63581751	cluster:42563	93	+	chr1	63492465	63643089	ENSMUSG00000025964.7	Adam23	+	6
chr1	63581829	63581852	cluster:42565	54	+	chr1	63492465	63643089	ENSMUSG00000025964.7	Adam23	+	23
chr1	63582753	63582767	cluster:42576	48	+	chr1	63492465	63643089	ENSMUSG00000025964.7	Adam23	+	14
chr1	63589562	63589582	cluster:42656	89	+	chr1	63492465	63643089	ENSMUSG00000025964.7	Adam23	+	20
chr1	63590282	63590294	cluster:42666	66	+	chr1	63492465	63643089	ENSMUSG00000025964.7	Adam23	+	12
chr1	63590802	63590815	cluster:42674	38	+	chr1	63492465	63643089	ENSMUSG00000025964.7	Adam23	+	13
chr1	63593047	63593053	cluster:42703	46	+	chr1	63492465	63643089	ENSMUSG00000025964.7	Adam23	+	6
chr1	63593513	63593519	cluster:42708	46	+	chr1	63492465	63643089	ENSMUSG00000025964.7	Adam23	+	6
chr1	63598369	63598377	cluster:42757	46	+	chr1	63492465	63643089	ENSMUSG00000025964.7	Adam23	+	8
chr1	63598389	63598393	cluster:42758	195	+	chr1	63492465	63643089	ENSMUSG00000025964.7	Adam23	+	4
chr1	63600981	63600993	cluster:42783	83	+	chr1	63492465	63643089	ENSMUSG00000025964.7	Adam23	+	12
chr1	63601757	63601795	cluster:42787	150	+	chr1	63492465	63643089	ENSMUSG00000025964.7	Adam23	+	38
chr1	63610718	63610739	cluster:42889	64	+	chr1	63492465	63643089	ENSMUSG00000025964.7	Adam23	+	21
chr1	63619546	63619557	cluster:42978	52	+	chr1	63492465	63643089	ENSMUSG00000025964.7	Adam23	+	11
chr1	63619580	63619595	cluster:42979	108	+	chr1	63492465	63643089	ENSMUSG00000025964.7	Adam23	+	15
chr1	63619773	63619800	cluster:42981	73	+	chr1	63492465	63643089	ENSMUSG00000025964.7	Adam23	+	27
chr1	63620188	63620194	cluster:42996	147	+	chr1	63492465	63643089	ENSMUSG00000025964.7	Adam23	+	6
chr1	63621030	63621033	cluster:43016	51	+	chr1	63492465	63643089	ENSMUSG00000025964.7	Adam23	+	3
chr1	63621118	63621129	cluster:43019	64	+	chr1	63492465	63643089	ENSMUSG00000025964.7	Adam23	+	11
chr1	63621770	63621777	cluster:43030	74	+	chr1	63492465	63643089	ENSMUSG00000025964.7	Adam23	+	7
chr1	63621821	63621858	cluster:43032	149	+	chr1	63492465	63643089	ENSMUSG00000025964.7	Adam23	+	37
chr1	63622170	63622190	cluster:43036	104	+	chr1	63492465	63643089	ENSMUSG00000025964.7	Adam23	+	20
chr1	63623848	63623852	cluster:43073	59	+	chr1	63492465	63643089	ENSMUSG00000025964.7	Adam23	+	4
chr1	63625156	63625165	cluster:43095	95	+	chr1	63492465	63643089	ENSMUSG00000025964.7	Adam23	+	9
chr1	63625269	63625275	cluster:43099	122	+	chr1	63492465	63643089	ENSMUSG00000025964.7	Adam23	+	6
chr1	63626006	63626017	cluster:43118	74	+	chr1	63492465	63643089	ENSMUSG00000025964.7	Adam23	+	11
chr1	63626033	63626043	cluster:43119	108	+	chr1	63492465	63643089	ENSMUSG00000025964.7	Adam23	+	10
chr1	63626059	63626065	cluster:43120	50	+	chr1	63492465	63643089	ENSMUSG00000025964.7	Adam23	+	6
chr1	63627424	63627434	cluster:43158	126	+	chr1	63492465	63643089	ENSMUSG00000025964.7	Adam23	+	10
chr1	63628355	63628374	cluster:43183	48	+	chr1	63492465	63643089	ENSMUSG00000025964.7	Adam23	+	19
chr1	63628519	63628526	cluster:43186	114	+	chr1	63492465	63643089	ENSMUSG00000025964.7	Adam23	+	7
chr1	63631385	63631397	cluster:43249	60	+	chr1	63492465	63643089	ENSMUSG00000025964.7	Adam23	+	12
chr1	63631410	63631429	cluster:43250	58	+	chr1	63492465	63643089	ENSMUSG00000025964.7	Adam23	+	19
chr1	63633347	63633353	cluster:43293	56	+	chr1	63492465	63643089	ENSMUSG00000025964.7	Adam23	+	6
chr1	63633698	63633716	cluster:43299	70	+	chr1	63492465	63643089	ENSMUSG00000025964.7	Adam23	+	18
chr1	63635226	63635253	cluster:43335	159	+	chr1	63492465	63643089	ENSMUSG00000025964.7	Adam23	+	27
chr1	63636013	63636025	cluster:43343	65	+	chr1	63492465	63643089	ENSMUSG00000025964.7	Adam23	+	12
chr1	63637163	63637176	cluster:43365	80	+	chr1	63492465	63643089	ENSMUSG00000025964.7	Adam23	+	13
chr1	63637467	63637477	cluster:43372	62	+	chr1	63492465	63643089	ENSMUSG00000025964.7	Adam23	+	10
chr1	63637975	63637988	cluster:43384	121	+	chr1	63492465	63643089	ENSMUSG00000025964.7	Adam23	+	13
chr1	63639283	63639294	cluster:43408	181	+	chr1	63492465	63643089	ENSMUSG00000025964.7	Adam23	+	11
chr1	63642371	63642390	cluster:43469	31	+	chr1	63492465	63643089	ENSMUSG00000025964.7	Adam23	+	19
chr1	63642458	63642489	cluster:43470	51	+	chr1	63492465	63643089	ENSMUSG00000025964.7	Adam23	+	31
chr1	63782170	63782180	cluster:43525	51	+	chr1	63777188	63801229	ENSMUSG00000025962.8	Fastkd2	+	10
chr1	64595869	64595872	cluster:44003	61	+	chr1	64579378	64651121	ENSMUSG00000025958.7	Creb1	+	3
chr1	64644025	64644055	cluster:44197	79	+	chr1	64579378	64651121	ENSMUSG00000025958.7	Creb1	+	30
chr1	64647330	64647349	cluster:44255	67	+	chr1	64579378	64651121	ENSMUSG00000025958.7	Creb1	+	19
chr1	64777286	64777333	cluster:44580	176	-	chr1	64777134	64784324	ENSMUSG00000045005.8	Fzd5	-	47
chr1	64777998	64778010	cluster:44597	213	-	chr1	64777134	64784324	ENSMUSG00000045005.8	Fzd5	-	12
chr1	64778221	64778226	cluster:44605	76	-	chr1	64777134	64784324	ENSMUSG00000045005.8	Fzd5	-	5
chr1	64778306	64778318	cluster:44606	81	-	chr1	64777134	64784324	ENSMUSG00000045005.8	Fzd5	-	12
chr1	64778522	64778538	cluster:44611	56	-	chr1	64777134	64784324	ENSMUSG00000045005.8	Fzd5	-	16
chr1	64779188	64779211	cluster:44628	139	-	chr1	64777134	64784324	ENSMUSG00000045005.8	Fzd5	-	23
chr1	64779582	64779597	cluster:44641	52	-	chr1	64777134	64784324	ENSMUSG00000045005.8	Fzd5	-	15
chr1	64779782	64779792	cluster:44646	111	-	chr1	64777134	64784324	ENSMUSG00000045005.8	Fzd5	-	10
chr1	64779855	64779873	cluster:44648	121	-	chr1	64777134	64784324	ENSMUSG00000045005.8	Fzd5	-	18
chr1	64780088	64780101	cluster:44655	109	-	chr1	64777134	64784324	ENSMUSG00000045005.8	Fzd5	-	13
chr1	64780326	64780330	cluster:44662	67	-	chr1	64777134	64784324	ENSMUSG00000045005.8	Fzd5	-	4
chr1	64780592	64780595	cluster:44669	75	-	chr1	64777134	64784324	ENSMUSG00000045005.8	Fzd5	-	3
chr1	64781133	64781159	cluster:44686	99	-	chr1	64777134	64784324	ENSMUSG00000045005.8	Fzd5	-	26
chr1	64781403	64781425	cluster:44695	88	-	chr1	64777134	64784324	ENSMUSG00000045005.8	Fzd5	-	22
chr1	64781767	64781773	cluster:44702	101	-	chr1	64777134	64784324	ENSMUSG00000045005.8	Fzd5	-	6
chr1	64782306	64782332	cluster:44717	113	-	chr1	64777134	64784324	ENSMUSG00000045005.8	Fzd5	-	26
chr1	64782384	64782406	cluster:44718	153	-	chr1	64777134	64784324	ENSMUSG00000045005.8	Fzd5	-	22
chr1	64782673	64782682	cluster:44724	85	-	chr1	64777134	64784324	ENSMUSG00000045005.8	Fzd5	-	9
chr1	64782723	64782735	cluster:44727	155	-	chr1	64777134	64784324	ENSMUSG00000045005.8	Fzd5	-	12
chr1	64782993	64783010	cluster:44735	67	-	chr1	64777134	64784324	ENSMUSG00000045005.8	Fzd5	-	17
chr1	64783843	64783861	cluster:44755	128	-	chr1	64777134	64784324	ENSMUSG00000045005.8	Fzd5	-	18
chr1	64784173	64784206	cluster:44764	139	-	chr1	64777134	64784324	ENSMUSG00000045005.8	Fzd5	-	33
chr1	65205447	65205461	cluster:45038	127	-	chr1	65205190	65233053	ENSMUSG00000025950.9	Idh1	-	14
chr1	65257930	65257940	cluster:45229	50	+	chr1	65233324	65320586	ENSMUSG00000025949.9	Pikfyve	+	10
chr1	66748521	66748532	cluster:45892	32	+	chr1	66747405	66766379	ENSMUSG00000026005.9	Rpe	+	11
chr1	66753022	66753039	cluster:45922	66	+	chr1	66747405	66766379	ENSMUSG00000026005.9	Rpe	+	17
chr1	66761470	66761491	cluster:45980	88	+	chr1	66747405	66766379	ENSMUSG00000026005.9	Rpe	+	21
chr1	66761751	66761753	cluster:45983	106	+	chr1	66747405	66766379	ENSMUSG00000026005.9	Rpe	+	2
chr1	66763487	66763510	cluster:46001	135	+	chr1	66747405	66766379	ENSMUSG00000026005.9	Rpe	+	23
chr1	66764636	66764649	cluster:46017	68	+	chr1	66747405	66766379	ENSMUSG00000026005.9	Rpe	+	13
chr1	66764828	66764839	cluster:46021	48	+	chr1	66747405	66766379	ENSMUSG00000026005.9	Rpe	+	11
chr1	66764894	66764910	cluster:46023	60	+	chr1	66747405	66766379	ENSMUSG00000026005.9	Rpe	+	16
chr1	71075610	71075618	cluster:47495	62	-	chr1	71074072	71149720	ENSMUSG00000026196.7	Bard1	-	8
chr1	71075817	71075832	cluster:47497	217	-	chr1	71074072	71149720	ENSMUSG00000026196.7	Bard1	-	15
chr1	71076878	71076890	cluster:47509	82	-	chr1	71074072	71149720	ENSMUSG00000026196.7	Bard1	-	12
chr1	71077009	71077014	cluster:47511	125	-	chr1	71074072	71149720	ENSMUSG00000026196.7	Bard1	-	5
chr1	71077066	71077074	cluster:47512	52	-	chr1	71074072	71149720	ENSMUSG00000026196.7	Bard1	-	8
chr1	71111844	71111861	cluster:47726	41	-	chr1	71074072	71149720	ENSMUSG00000026196.7	Bard1	-	17
chr1	71119367	71119371	cluster:47799	102	-	chr1	71074072	71149720	ENSMUSG00000026196.7	Bard1	-	4
chr1	71121571	71121574	cluster:47829	38	-	chr1	71074072	71149720	ENSMUSG00000026196.7	Bard1	-	3
chr1	71121876	71121886	cluster:47836	77	-	chr1	71074072	71149720	ENSMUSG00000026196.7	Bard1	-	10
chr1	71122232	71122253	cluster:47842	82	-	chr1	71074072	71149720	ENSMUSG00000026196.7	Bard1	-	21
chr1	71125467	71125477	cluster:47891	62	-	chr1	71074072	71149720	ENSMUSG00000026196.7	Bard1	-	10
chr1	71135853	71135863	cluster:47928	46	-	chr1	71074072	71149720	ENSMUSG00000026196.7	Bard1	-	10
chr1	71149492	71149507	cluster:48044	40	-	chr1	71074072	71149720	ENSMUSG00000026196.7	Bard1	-	15
chr1	71603774	71603798	cluster:48109	100	+	chr1	71603724	71626205	ENSMUSG00000026192.7	Atic	+	24
chr1	71607509	71607521	cluster:48141	54	+	chr1	71603724	71626205	ENSMUSG00000026192.7	Atic	+	12
chr1	71615578	71615598	cluster:48195	79	+	chr1	71603724	71626205	ENSMUSG00000026192.7	Atic	+	20
chr1	71616418	71616467	cluster:48200	124	+	chr1	71603724	71626205	ENSMUSG00000026192.7	Atic	+	49
chr1	71624366	71624390	cluster:48249	54	+	chr1	71603724	71626205	ENSMUSG00000026192.7	Atic	+	24
chr1	71625295	71625331	cluster:48263	134	+	chr1	71603724	71626205	ENSMUSG00000026192.7	Atic	+	36
chr1	71625342	71625369	cluster:48264	46	+	chr1	71603724	71626205	ENSMUSG00000026192.7	Atic	+	27
chr1	71625604	71625608	cluster:48271	93	+	chr1	71603724	71626205	ENSMUSG00000026192.7	Atic	+	4
chr1	71625626	71625652	cluster:48272	147	+	chr1	71603724	71626205	ENSMUSG00000026192.7	Atic	+	26
chr1	71625697	71625744	cluster:48274	93	+	chr1	71603724	71626205	ENSMUSG00000026192.7	Atic	+	47
chr1	71625938	71625948	cluster:48281	44	+	chr1	71603724	71626205	ENSMUSG00000026192.7	Atic	+	10
chr1	71632162	71632167	cluster:48294	75	-	chr1	71632094	71699774	ENSMUSG00000026193.8	Fn1	-	5
chr1	71632181	71632213	cluster:48295	101	-	chr1	71632094	71699774	ENSMUSG00000026193.8	Fn1	-	32
chr1	71632275	71632311	cluster:48297	104	-	chr1	71632094	71699774	ENSMUSG00000026193.8	Fn1	-	36
chr1	71632509	71632526	cluster:48304	132	-	chr1	71632094	71699774	ENSMUSG00000026193.8	Fn1	-	17
chr1	71632554	71632568	cluster:48306	77	-	chr1	71632094	71699774	ENSMUSG00000026193.8	Fn1	-	14
chr1	71632642	71632644	cluster:48310	170	-	chr1	71632094	71699774	ENSMUSG00000026193.8	Fn1	-	2
chr1	71632707	71632719	cluster:48314	51	-	chr1	71632094	71699774	ENSMUSG00000026193.8	Fn1	-	12
chr1	71633480	71633502	cluster:48322	100	-	chr1	71632094	71699774	ENSMUSG00000026193.8	Fn1	-	22
chr1	71638027	71638043	cluster:48357	49	-	chr1	71632094	71699774	ENSMUSG00000026193.8	Fn1	-	16
chr1	71639647	71639665	cluster:48389	79	-	chr1	71632094	71699774	ENSMUSG00000026193.8	Fn1	-	18
chr1	71639703	71639720	cluster:48391	122	-	chr1	71632094	71699774	ENSMUSG00000026193.8	Fn1	-	17
chr1	71639735	71639762	cluster:48392	201	-	chr1	71632094	71699774	ENSMUSG00000026193.8	Fn1	-	27
chr1	71640994	71641016	cluster:48417	142	-	chr1	71632094	71699774	ENSMUSG00000026193.8	Fn1	-	22
chr1	71641828	71641845	cluster:48428	70	-	chr1	71632094	71699774	ENSMUSG00000026193.8	Fn1	-	17
chr1	71641969	71641984	cluster:48431	101	-	chr1	71632094	71699774	ENSMUSG00000026193.8	Fn1	-	15
chr1	71642251	71642266	cluster:48437	94	-	chr1	71632094	71699774	ENSMUSG00000026193.8	Fn1	-	15
chr1	71642305	71642310	cluster:48439	62	-	chr1	71632094	71699774	ENSMUSG00000026193.8	Fn1	-	5
chr1	71642321	71642334	cluster:48440	59	-	chr1	71632094	71699774	ENSMUSG00000026193.8	Fn1	-	13
chr1	71644103	71644149	cluster:48464	333	-	chr1	71632094	71699774	ENSMUSG00000026193.8	Fn1	-	46
chr1	71644169	71644181	cluster:48465	103	-	chr1	71632094	71699774	ENSMUSG00000026193.8	Fn1	-	12
chr1	71644296	71644329	cluster:48469	108	-	chr1	71632094	71699774	ENSMUSG00000026193.8	Fn1	-	33
chr1	71644779	71644787	cluster:48480	85	-	chr1	71632094	71699774	ENSMUSG00000026193.8	Fn1	-	8
chr1	71644984	71645020	cluster:48486	198	-	chr1	71632094	71699774	ENSMUSG00000026193.8	Fn1	-	36
chr1	71645792	71645817	cluster:48494	61	-	chr1	71632094	71699774	ENSMUSG00000026193.8	Fn1	-	25
chr1	71645864	71645871	cluster:48496	58	-	chr1	71632094	71699774	ENSMUSG00000026193.8	Fn1	-	7
chr1	71646243	71646249	cluster:48503	167	-	chr1	71632094	71699774	ENSMUSG00000026193.8	Fn1	-	6
chr1	71646867	71646884	cluster:48509	142	-	chr1	71632094	71699774	ENSMUSG00000026193.8	Fn1	-	17
chr1	71647834	71647855	cluster:48524	139	-	chr1	71632094	71699774	ENSMUSG00000026193.8	Fn1	-	21
chr1	71648886	71648897	cluster:48537	96	-	chr1	71632094	71699774	ENSMUSG00000026193.8	Fn1	-	11
chr1	71648978	71649006	cluster:48539	169	-	chr1	71632094	71699774	ENSMUSG00000026193.8	Fn1	-	28
chr1	71649033	71649046	cluster:48541	69	-	chr1	71632094	71699774	ENSMUSG00000026193.8	Fn1	-	13
chr1	71649106	71649129	cluster:48542	87	-	chr1	71632094	71699774	ENSMUSG00000026193.8	Fn1	-	23
chr1	71649217	71649231	cluster:48546	115	-	chr1	71632094	71699774	ENSMUSG00000026193.8	Fn1	-	14
chr1	71649332	71649356	cluster:48549	137	-	chr1	71632094	71699774	ENSMUSG00000026193.8	Fn1	-	24
chr1	71650032	71650038	cluster:48562	157	-	chr1	71632094	71699774	ENSMUSG00000026193.8	Fn1	-	6
chr1	71650073	71650088	cluster:48564	65	-	chr1	71632094	71699774	ENSMUSG00000026193.8	Fn1	-	15
chr1	71651593	71651652	cluster:48601	367	-	chr1	71632094	71699774	ENSMUSG00000026193.8	Fn1	-	59
chr1	71652557	71652582	cluster:48612	96	-	chr1	71632094	71699774	ENSMUSG00000026193.8	Fn1	-	25
chr1	71652608	71652614	cluster:48613	93	-	chr1	71632094	71699774	ENSMUSG00000026193.8	Fn1	-	6
chr1	71653306	71653322	cluster:48621	92	-	chr1	71632094	71699774	ENSMUSG00000026193.8	Fn1	-	16
chr1	71653351	71653377	cluster:48623	336	-	chr1	71632094	71699774	ENSMUSG00000026193.8	Fn1	-	26
chr1	71654527	71654539	cluster:48633	68	-	chr1	71632094	71699774	ENSMUSG00000026193.8	Fn1	-	12
chr1	71654564	71654585	cluster:48634	150	-	chr1	71632094	71699774	ENSMUSG00000026193.8	Fn1	-	21
chr1	71656025	71656053	cluster:48644	141	-	chr1	71632094	71699774	ENSMUSG00000026193.8	Fn1	-	28
chr1	71656133	71656151	cluster:48648	218	-	chr1	71632094	71699774	ENSMUSG00000026193.8	Fn1	-	18
chr1	71657568	71657576	cluster:48661	190	-	chr1	71632094	71699774	ENSMUSG00000026193.8	Fn1	-	8
chr1	71659131	71659152	cluster:48678	44	-	chr1	71632094	71699774	ENSMUSG00000026193.8	Fn1	-	21
chr1	71660226	71660231	cluster:48705	147	-	chr1	71632094	71699774	ENSMUSG00000026193.8	Fn1	-	5
chr1	71660377	71660391	cluster:48710	153	-	chr1	71632094	71699774	ENSMUSG00000026193.8	Fn1	-	14
chr1	71660464	71660476	cluster:48712	169	-	chr1	71632094	71699774	ENSMUSG00000026193.8	Fn1	-	12
chr1	71660646	71660665	cluster:48718	71	-	chr1	71632094	71699774	ENSMUSG00000026193.8	Fn1	-	19
chr1	71660944	71660958	cluster:48724	68	-	chr1	71632094	71699774	ENSMUSG00000026193.8	Fn1	-	14
chr1	71661048	71661057	cluster:48727	123	-	chr1	71632094	71699774	ENSMUSG00000026193.8	Fn1	-	9
chr1	71661069	71661073	cluster:48728	125	-	chr1	71632094	71699774	ENSMUSG00000026193.8	Fn1	-	4
chr1	71662017	71662042	cluster:48745	155	-	chr1	71632094	71699774	ENSMUSG00000026193.8	Fn1	-	25
chr1	71662089	71662103	cluster:48747	144	-	chr1	71632094	71699774	ENSMUSG00000026193.8	Fn1	-	14
chr1	71664886	71664901	cluster:48773	111	-	chr1	71632094	71699774	ENSMUSG00000026193.8	Fn1	-	15
chr1	71665207	71665221	cluster:48778	123	-	chr1	71632094	71699774	ENSMUSG00000026193.8	Fn1	-	14
chr1	71666059	71666061	cluster:48791	95	-	chr1	71632094	71699774	ENSMUSG00000026193.8	Fn1	-	2
chr1	71667361	71667376	cluster:48811	38	-	chr1	71632094	71699774	ENSMUSG00000026193.8	Fn1	-	15
chr1	71670720	71670728	cluster:48848	71	-	chr1	71632094	71699774	ENSMUSG00000026193.8	Fn1	-	8
chr1	71670815	71670836	cluster:48851	162	-	chr1	71632094	71699774	ENSMUSG00000026193.8	Fn1	-	21
chr1	71670859	71670877	cluster:48852	40	-	chr1	71632094	71699774	ENSMUSG00000026193.8	Fn1	-	18
chr1	71672442	71672445	cluster:48867	193	-	chr1	71632094	71699774	ENSMUSG00000026193.8	Fn1	-	3
chr1	71672482	71672501	cluster:48868	65	-	chr1	71632094	71699774	ENSMUSG00000026193.8	Fn1	-	19
chr1	71672601	71672618	cluster:48872	94	-	chr1	71632094	71699774	ENSMUSG00000026193.8	Fn1	-	17
chr1	71672719	71672759	cluster:48875	156	-	chr1	71632094	71699774	ENSMUSG00000026193.8	Fn1	-	40
chr1	71672810	71672818	cluster:48877	90	-	chr1	71632094	71699774	ENSMUSG00000026193.8	Fn1	-	8
chr1	71673740	71673746	cluster:48885	95	-	chr1	71632094	71699774	ENSMUSG00000026193.8	Fn1	-	6
chr1	71673803	71673821	cluster:48888	225	-	chr1	71632094	71699774	ENSMUSG00000026193.8	Fn1	-	18
chr1	71673850	71673890	cluster:48889	168	-	chr1	71632094	71699774	ENSMUSG00000026193.8	Fn1	-	40
chr1	71673904	71673923	cluster:48890	147	-	chr1	71632094	71699774	ENSMUSG00000026193.8	Fn1	-	19
chr1	71675029	71675055	cluster:48905	148	-	chr1	71632094	71699774	ENSMUSG00000026193.8	Fn1	-	26
chr1	71675894	71675902	cluster:48916	85	-	chr1	71632094	71699774	ENSMUSG00000026193.8	Fn1	-	8
chr1	71675919	71675958	cluster:48917	159	-	chr1	71632094	71699774	ENSMUSG00000026193.8	Fn1	-	39
chr1	71676263	71676283	cluster:48923	102	-	chr1	71632094	71699774	ENSMUSG00000026193.8	Fn1	-	20
chr1	71676317	71676334	cluster:48925	109	-	chr1	71632094	71699774	ENSMUSG00000026193.8	Fn1	-	17
chr1	71676370	71676390	cluster:48927	134	-	chr1	71632094	71699774	ENSMUSG00000026193.8	Fn1	-	20
chr1	71676409	71676420	cluster:48928	150	-	chr1	71632094	71699774	ENSMUSG00000026193.8	Fn1	-	11
chr1	71679512	71679517	cluster:48966	134	-	chr1	71632094	71699774	ENSMUSG00000026193.8	Fn1	-	5
chr1	71683937	71683943	cluster:49009	184	-	chr1	71632094	71699774	ENSMUSG00000026193.8	Fn1	-	6
chr1	71685044	71685048	cluster:49017	92	-	chr1	71632094	71699774	ENSMUSG00000026193.8	Fn1	-	4
chr1	71685088	71685160	cluster:49019	388	-	chr1	71632094	71699774	ENSMUSG00000026193.8	Fn1	-	72
chr1	71686871	71686899	cluster:49036	116	-	chr1	71632094	71699774	ENSMUSG00000026193.8	Fn1	-	28
chr1	71686918	71686945	cluster:49037	138	-	chr1	71632094	71699774	ENSMUSG00000026193.8	Fn1	-	27
chr1	71686978	71686998	cluster:49039	203	-	chr1	71632094	71699774	ENSMUSG00000026193.8	Fn1	-	20
chr1	71687740	71687775	cluster:49050	351	-	chr1	71632094	71699774	ENSMUSG00000026193.8	Fn1	-	35
chr1	71687787	71687794	cluster:49051	336	-	chr1	71632094	71699774	ENSMUSG00000026193.8	Fn1	-	7
chr1	71687854	71687890	cluster:49053	154	-	chr1	71632094	71699774	ENSMUSG00000026193.8	Fn1	-	36
chr1	71688520	71688546	cluster:49059	73	-	chr1	71632094	71699774	ENSMUSG00000026193.8	Fn1	-	26
chr1	71688562	71688574	cluster:49060	110	-	chr1	71632094	71699774	ENSMUSG00000026193.8	Fn1	-	12
chr1	71688664	71688687	cluster:49065	130	-	chr1	71632094	71699774	ENSMUSG00000026193.8	Fn1	-	23
chr1	71689636	71689675	cluster:49080	160	-	chr1	71632094	71699774	ENSMUSG00000026193.8	Fn1	-	39
chr1	71689688	71689700	cluster:49081	155	-	chr1	71632094	71699774	ENSMUSG00000026193.8	Fn1	-	12
chr1	71689711	71689725	cluster:49082	100	-	chr1	71632094	71699774	ENSMUSG00000026193.8	Fn1	-	14
chr1	71692145	71692157	cluster:49102	181	-	chr1	71632094	71699774	ENSMUSG00000026193.8	Fn1	-	12
chr1	71692169	71692187	cluster:49103	179	-	chr1	71632094	71699774	ENSMUSG00000026193.8	Fn1	-	18
chr1	71695786	71695823	cluster:49151	167	-	chr1	71632094	71699774	ENSMUSG00000026193.8	Fn1	-	37
chr1	71697168	71697176	cluster:49171	104	-	chr1	71632094	71699774	ENSMUSG00000026193.8	Fn1	-	8
chr1	71697198	71697225	cluster:49172	194	-	chr1	71632094	71699774	ENSMUSG00000026193.8	Fn1	-	27
chr1	71698111	71698145	cluster:49178	430	-	chr1	71632094	71699774	ENSMUSG00000026193.8	Fn1	-	34
chr1	71698157	71698209	cluster:49179	346	-	chr1	71632094	71699774	ENSMUSG00000026193.8	Fn1	-	52
chr1	71699499	71699523	cluster:49194	216	-	chr1	71632094	71699774	ENSMUSG00000026193.8	Fn1	-	24
chr1	71699543	71699577	cluster:49196	377	-	chr1	71632094	71699774	ENSMUSG00000026193.8	Fn1	-	34
chr1	71699683	71699691	cluster:49201	110	-	chr1	71632094	71699774	ENSMUSG00000026193.8	Fn1	-	8
chr1	72206338	72206344	cluster:49424	64	-	chr1	72205807	72258881	ENSMUSG00000039395.7	Mreg	-	6
chr1	72206540	72206558	cluster:49427	118	-	chr1	72205807	72258881	ENSMUSG00000039395.7	Mreg	-	18
chr1	72206910	72206914	cluster:49434	99	-	chr1	72205807	72258881	ENSMUSG00000039395.7	Mreg	-	4
chr1	72207334	72207361	cluster:49448	74	-	chr1	72205807	72258881	ENSMUSG00000039395.7	Mreg	-	27
chr1	72207431	72207451	cluster:49450	63	-	chr1	72205807	72258881	ENSMUSG00000039395.7	Mreg	-	20
chr1	72233849	72233866	cluster:49645	43	-	chr1	72205807	72258881	ENSMUSG00000039395.7	Mreg	-	17
chr1	72288137	72288157	cluster:49849	142	+	chr1	72283039	72321443	ENSMUSG00000085769.1	D230017M19Rik	+	20
chr1	72290943	72290963	cluster:49870	502	+	chr1	72283039	72321443	ENSMUSG00000085769.1	D230017M19Rik	+	20
chr1	72291310	72291322	cluster:49875	105	+	chr1	72283039	72321443	ENSMUSG00000085769.1	D230017M19Rik	+	12
chr1	72301605	72301657	cluster:49924	503	+	chr1	72283039	72321443	ENSMUSG00000085769.1	D230017M19Rik	+	52
chr1	72357043	72357045	cluster:50061	64	+	chr1	72353995	72441526	ENSMUSG00000026187.8	Xrcc5	+	2
chr1	72362041	72362058	cluster:50101	82	+	chr1	72353995	72441526	ENSMUSG00000026187.8	Xrcc5	+	17
chr1	72362109	72362141	cluster:50103	67	+	chr1	72353995	72441526	ENSMUSG00000026187.8	Xrcc5	+	32
chr1	72365571	72365596	cluster:50142	80	+	chr1	72353995	72441526	ENSMUSG00000026187.8	Xrcc5	+	25
chr1	72371677	72371701	cluster:50183	163	+	chr1	72353995	72441526	ENSMUSG00000026187.8	Xrcc5	+	24
chr1	72376583	72376596	cluster:50214	52	+	chr1	72353995	72441526	ENSMUSG00000026187.8	Xrcc5	+	13
chr1	72385532	72385551	cluster:50259	63	+	chr1	72353995	72441526	ENSMUSG00000026187.8	Xrcc5	+	19
chr1	72385988	72385991	cluster:50265	32	+	chr1	72353995	72441526	ENSMUSG00000026187.8	Xrcc5	+	3
chr1	72390308	72390319	cluster:50296	145	+	chr1	72353995	72441526	ENSMUSG00000026187.8	Xrcc5	+	11
chr1	72390487	72390495	cluster:50300	53	+	chr1	72353995	72441526	ENSMUSG00000026187.8	Xrcc5	+	8
chr1	72403477	72403488	cluster:50399	75	+	chr1	72353995	72441526	ENSMUSG00000026187.8	Xrcc5	+	11
chr1	72404345	72404359	cluster:50414	92	+	chr1	72353995	72441526	ENSMUSG00000026187.8	Xrcc5	+	14
chr1	72425995	72426006	cluster:50586	42	+	chr1	72353995	72441526	ENSMUSG00000026187.8	Xrcc5	+	11
chr1	72428226	72428255	cluster:50602	114	+	chr1	72353995	72441526	ENSMUSG00000026187.8	Xrcc5	+	29
chr1	72428385	72428407	cluster:50605	249	+	chr1	72353995	72441526	ENSMUSG00000026187.8	Xrcc5	+	22
chr1	72428543	72428557	cluster:50609	68	+	chr1	72353995	72441526	ENSMUSG00000026187.8	Xrcc5	+	14
chr1	72428643	72428654	cluster:50610	38	+	chr1	72353995	72441526	ENSMUSG00000026187.8	Xrcc5	+	11
chr1	72441475	72441494	cluster:50708	75	+	chr1	72353995	72441526	ENSMUSG00000026187.8	Xrcc5	+	19
chr1	72760174	72760191	cluster:50909	85	+	chr1	72757834	72760383	ENSMUSG00000046330.9	Rpl37a	+	17
chr1	72760229	72760248	cluster:50911	74	+	chr1	72757834	72760383	ENSMUSG00000046330.9	Rpl37a	+	19
chr1	72760265	72760280	cluster:50912	56	+	chr1	72757834	72760383	ENSMUSG00000046330.9	Rpl37a	+	15
chr1	72871091	72871104	cluster:50970	102	+	chr1	72871077	72899048	ENSMUSG00000039323.11	Igfbp2	+	13
chr1	72871438	72871441	cluster:50975	73	+	chr1	72871077	72899048	ENSMUSG00000039323.11	Igfbp2	+	3
chr1	72885927	72885934	cluster:51094	34	+	chr1	72871077	72899048	ENSMUSG00000039323.11	Igfbp2	+	7
chr1	72895719	72895721	cluster:51166	108	+	chr1	72871077	72899048	ENSMUSG00000039323.11	Igfbp2	+	2
chr1	72896171	72896190	cluster:51173	152	+	chr1	72871077	72899048	ENSMUSG00000039323.11	Igfbp2	+	19
chr1	72898622	72898624	cluster:51187	55	+	chr1	72871077	72899048	ENSMUSG00000039323.11	Igfbp2	+	2
chr1	72898817	72898848	cluster:51193	173	+	chr1	72871077	72899048	ENSMUSG00000039323.11	Igfbp2	+	31
chr1	72898986	72898996	cluster:51197	125	+	chr1	72871077	72899048	ENSMUSG00000039323.11	Igfbp2	+	10
chr1	72899016	72899020	cluster:51198	70	+	chr1	72871077	72899048	ENSMUSG00000039323.11	Igfbp2	+	4
chr1	74309139	74309156	cluster:51780	102	+	chr1	74283071	74314783	ENSMUSG00000006304.8	Arpc2	+	17
chr1	74314595	74314610	cluster:51820	144	+	chr1	74283071	74314783	ENSMUSG00000006304.8	Arpc2	+	15
chr1	74326510	74326519	cluster:51836	42	-	chr1	74326421	74331254	ENSMUSG00000006299.6	Aamp	-	9
chr1	74326596	74326600	cluster:51841	53	-	chr1	74326421	74331254	ENSMUSG00000006299.6	Aamp	-	4
chr1	74326691	74326706	cluster:51842	90	-	chr1	74326421	74331254	ENSMUSG00000006299.6	Aamp	-	15
chr1	74328681	74328687	cluster:51869	29	-	chr1	74326421	74331254	ENSMUSG00000006299.6	Aamp	-	6
chr1	74330523	74330562	cluster:51884	171	-	chr1	74326421	74331254	ENSMUSG00000006299.6	Aamp	-	39
chr1	74482778	74482800	cluster:52085	79	-	chr1	74482084	74590860	ENSMUSG00000033364.6	Usp37	-	22
chr1	74483404	74483408	cluster:52101	84	-	chr1	74482084	74590860	ENSMUSG00000033364.6	Usp37	-	4
chr1	74483566	74483576	cluster:52104	93	-	chr1	74482084	74590860	ENSMUSG00000033364.6	Usp37	-	10
chr1	74483745	74483755	cluster:52109	71	-	chr1	74482084	74590860	ENSMUSG00000033364.6	Usp37	-	10
chr1	74483942	74483953	cluster:52111	92	-	chr1	74482084	74590860	ENSMUSG00000033364.6	Usp37	-	11
chr1	74484655	74484692	cluster:52125	144	-	chr1	74482084	74590860	ENSMUSG00000033364.6	Usp37	-	37
chr1	74485329	74485354	cluster:52140	59	-	chr1	74482084	74590860	ENSMUSG00000033364.6	Usp37	-	25
chr1	74485959	74485978	cluster:52152	59	-	chr1	74482084	74590860	ENSMUSG00000033364.6	Usp37	-	19
chr1	74526191	74526202	cluster:52327	95	-	chr1	74482084	74590860	ENSMUSG00000033364.6	Usp37	-	11
chr1	74544529	74544535	cluster:52421	57	-	chr1	74482084	74590860	ENSMUSG00000033364.6	Usp37	-	6
chr1	74546243	74546250	cluster:52438	88	-	chr1	74482084	74590860	ENSMUSG00000033364.6	Usp37	-	7
chr1	74546409	74546442	cluster:52442	88	-	chr1	74482084	74590860	ENSMUSG00000033364.6	Usp37	-	33
chr1	74563725	74563742	cluster:52521	70	+	chr1	74552632	74577418	ENSMUSG00000026174.8	Rqcd1	+	17
chr1	74565484	74565498	cluster:52530	109	+	chr1	74552632	74577418	ENSMUSG00000026174.8	Rqcd1	+	14
chr1	74575764	74575786	cluster:52599	112	+	chr1	74552632	74577418	ENSMUSG00000026174.8	Rqcd1	+	22
chr1	74575804	74575834	cluster:52600	181	+	chr1	74552632	74577418	ENSMUSG00000026174.8	Rqcd1	+	30
chr1	74575897	74575908	cluster:52602	121	+	chr1	74552632	74577418	ENSMUSG00000026174.8	Rqcd1	+	11
chr1	74576183	74576218	cluster:52606	275	+	chr1	74552632	74577418	ENSMUSG00000026174.8	Rqcd1	+	35
chr1	74576384	74576387	cluster:52613	48	+	chr1	74552632	74577418	ENSMUSG00000026174.8	Rqcd1	+	3
chr1	74630845	74630849	cluster:52751	91	-	chr1	74611701	74634820	ENSMUSG00000026135.10	Zfp142	-	4
chr1	74726181	74726194	cluster:53032	73	+	chr1	74708319	74748406	ENSMUSG00000033257.8	Ttll4	+	13
chr1	74738575	74738587	cluster:53140	63	+	chr1	74708319	74748406	ENSMUSG00000033257.8	Ttll4	+	12
chr1	74740641	74740647	cluster:53155	132	+	chr1	74708319	74748406	ENSMUSG00000033257.8	Ttll4	+	6
chr1	75211983	75211987	cluster:53725	70	-	chr1	75211549	75215828	ENSMUSG00000026202.7	Tuba4a	-	4
chr1	75212909	75212939	cluster:53745	105	-	chr1	75211549	75215828	ENSMUSG00000026202.7	Tuba4a	-	30
chr1	75471213	75471216	cluster:54033	63	-	chr1	75471144	75476046	ENSMUSG00000032997.10	Chpf	-	3
chr1	75500453	75500469	cluster:54111	106	-	chr1	75475885	75503027	ENSMUSG00000026211.10	Obsl1	-	16
chr1	77441578	77441588	cluster:54678	91	-	chr1	77363760	77511663	ENSMUSG00000026235.7	Epha4	-	10
chr1	78421698	78421717	cluster:55021	78	-	chr1	78414533	78485434	ENSMUSG00000026245.9	Farsb	-	19
chr1	78421874	78421883	cluster:55026	48	-	chr1	78414533	78485434	ENSMUSG00000026245.9	Farsb	-	9
chr1	78469148	78469167	cluster:55314	100	-	chr1	78414533	78485434	ENSMUSG00000026245.9	Farsb	-	19
chr1	78470740	78470754	cluster:55327	81	-	chr1	78414533	78485434	ENSMUSG00000026245.9	Farsb	-	14
chr1	78658809	78658830	cluster:55513	167	+	chr1	78654400	78703562	ENSMUSG00000032883.9	Acsl3	+	21
chr1	78658809	78658830	cluster:55513	167	+	chr1	78654613	78664163	ENSMUSG00000079470.2	Utp14b	+	21
chr1	78663461	78663480	cluster:55548	112	+	chr1	78654400	78703562	ENSMUSG00000032883.9	Acsl3	+	19
chr1	78663461	78663480	cluster:55548	112	+	chr1	78654613	78664163	ENSMUSG00000079470.2	Utp14b	+	19
chr1	78664644	78664660	cluster:55565	45	+	chr1	78654400	78703562	ENSMUSG00000032883.9	Acsl3	+	16
chr1	78678344	78678353	cluster:55669	41	+	chr1	78654400	78703562	ENSMUSG00000032883.9	Acsl3	+	9
chr1	78701818	78701825	cluster:55754	40	+	chr1	78654400	78703562	ENSMUSG00000032883.9	Acsl3	+	7
chr1	79777867	79777877	cluster:56142	73	+	chr1	79772593	79778020	ENSMUSG00000026248.8	Mrpl44	+	10
chr1	80263183	80263202	cluster:56304	39	-	chr1	80261498	80337055	ENSMUSG00000004364.8	Cul3	-	19
chr1	80277465	80277473	cluster:56392	100	-	chr1	80261498	80337055	ENSMUSG00000004364.8	Cul3	-	8
chr1	80285337	80285346	cluster:56457	76	-	chr1	80261498	80337055	ENSMUSG00000004364.8	Cul3	-	9
chr1	80285359	80285372	cluster:56458	56	-	chr1	80261498	80337055	ENSMUSG00000004364.8	Cul3	-	13
chr1	80286690	80286704	cluster:56470	109	-	chr1	80261498	80337055	ENSMUSG00000004364.8	Cul3	-	14
chr1	80286800	80286812	cluster:56473	61	-	chr1	80261498	80337055	ENSMUSG00000004364.8	Cul3	-	12
chr1	80300658	80300664	cluster:56548	111	-	chr1	80261498	80337055	ENSMUSG00000004364.8	Cul3	-	6
chr1	80319588	80319614	cluster:56640	69	-	chr1	80261498	80337055	ENSMUSG00000004364.8	Cul3	-	26
chr1	82740066	82740077	cluster:57397	69	+	chr1	82721465	82748969	ENSMUSG00000026150.7	Mff	+	11
chr1	82748881	82748908	cluster:57460	68	+	chr1	82721465	82748969	ENSMUSG00000026150.7	Mff	+	27
chr1	82872509	82872523	cluster:57681	96	+	chr1	82836058	82892850	ENSMUSG00000026159.6	Agfg1	+	14
chr1	82876672	82876684	cluster:57713	172	+	chr1	82836058	82892850	ENSMUSG00000026159.6	Agfg1	+	12
chr1	82883014	82883027	cluster:57775	65	+	chr1	82836058	82892850	ENSMUSG00000026159.6	Agfg1	+	13
chr1	82887001	82887018	cluster:57810	125	+	chr1	82836058	82892850	ENSMUSG00000026159.6	Agfg1	+	17
chr1	82887558	82887562	cluster:57812	46	+	chr1	82836058	82892850	ENSMUSG00000026159.6	Agfg1	+	4
chr1	82887790	82887796	cluster:57816	40	+	chr1	82836058	82892850	ENSMUSG00000026159.6	Agfg1	+	6
chr1	82892050	82892062	cluster:57869	48	+	chr1	82836058	82892850	ENSMUSG00000026159.6	Agfg1	+	12
chr1	82892807	82892833	cluster:57886	53	+	chr1	82836058	82892850	ENSMUSG00000026159.6	Agfg1	+	26
chr1	84720068	84720073	cluster:58630	63	-	chr1	84717764	84835879	ENSMUSG00000026219.8	Trip12	-	5
chr1	84720118	84720142	cluster:58632	159	-	chr1	84717764	84835879	ENSMUSG00000026219.8	Trip12	-	24
chr1	84720241	84720245	cluster:58635	91	-	chr1	84717764	84835879	ENSMUSG00000026219.8	Trip12	-	4
chr1	84720762	84720769	cluster:58645	96	-	chr1	84717764	84835879	ENSMUSG00000026219.8	Trip12	-	7
chr1	84721082	84721126	cluster:58655	197	-	chr1	84717764	84835879	ENSMUSG00000026219.8	Trip12	-	44
chr1	84721242	84721269	cluster:58657	44	-	chr1	84717764	84835879	ENSMUSG00000026219.8	Trip12	-	27
chr1	84721302	84721316	cluster:58659	69	-	chr1	84717764	84835879	ENSMUSG00000026219.8	Trip12	-	14
chr1	84721989	84722014	cluster:58663	117	-	chr1	84717764	84835879	ENSMUSG00000026219.8	Trip12	-	25
chr1	84722818	84722842	cluster:58674	159	-	chr1	84717764	84835879	ENSMUSG00000026219.8	Trip12	-	24
chr1	84724785	84724807	cluster:58707	46	-	chr1	84717764	84835879	ENSMUSG00000026219.8	Trip12	-	22
chr1	84727161	84727183	cluster:58738	70	-	chr1	84717764	84835879	ENSMUSG00000026219.8	Trip12	-	22
chr1	84728282	84728302	cluster:58760	120	-	chr1	84717764	84835879	ENSMUSG00000026219.8	Trip12	-	20
chr1	84728325	84728333	cluster:58761	120	-	chr1	84717764	84835879	ENSMUSG00000026219.8	Trip12	-	8
chr1	84728635	84728648	cluster:58763	81	-	chr1	84717764	84835879	ENSMUSG00000026219.8	Trip12	-	13
chr1	84730321	84730352	cluster:58795	170	-	chr1	84717764	84835879	ENSMUSG00000026219.8	Trip12	-	31
chr1	84732698	84732701	cluster:58828	93	-	chr1	84717764	84835879	ENSMUSG00000026219.8	Trip12	-	3
chr1	84733609	84733628	cluster:58845	145	-	chr1	84717764	84835879	ENSMUSG00000026219.8	Trip12	-	19
chr1	84733652	84733663	cluster:58847	94	-	chr1	84717764	84835879	ENSMUSG00000026219.8	Trip12	-	11
chr1	84735277	84735288	cluster:58868	89	-	chr1	84717764	84835879	ENSMUSG00000026219.8	Trip12	-	11
chr1	84735352	84735374	cluster:58870	252	-	chr1	84717764	84835879	ENSMUSG00000026219.8	Trip12	-	22
chr1	84735388	84735398	cluster:58871	85	-	chr1	84717764	84835879	ENSMUSG00000026219.8	Trip12	-	10
chr1	84735854	84735864	cluster:58881	27	-	chr1	84717764	84835879	ENSMUSG00000026219.8	Trip12	-	10
chr1	84736159	84736213	cluster:58887	188	-	chr1	84717764	84835879	ENSMUSG00000026219.8	Trip12	-	54
chr1	84736379	84736384	cluster:58892	72	-	chr1	84717764	84835879	ENSMUSG00000026219.8	Trip12	-	5
chr1	84738823	84738845	cluster:58906	112	-	chr1	84717764	84835879	ENSMUSG00000026219.8	Trip12	-	22
chr1	84739137	84739152	cluster:58914	46	-	chr1	84717764	84835879	ENSMUSG00000026219.8	Trip12	-	15
chr1	84739191	84739205	cluster:58916	100	-	chr1	84717764	84835879	ENSMUSG00000026219.8	Trip12	-	14
chr1	84739676	84739695	cluster:58923	185	-	chr1	84717764	84835879	ENSMUSG00000026219.8	Trip12	-	19
chr1	84739753	84739796	cluster:58926	203	-	chr1	84717764	84835879	ENSMUSG00000026219.8	Trip12	-	43
chr1	84740565	84740583	cluster:58940	204	-	chr1	84717764	84835879	ENSMUSG00000026219.8	Trip12	-	18
chr1	84741314	84741326	cluster:58946	34	-	chr1	84717764	84835879	ENSMUSG00000026219.8	Trip12	-	12
chr1	84741666	84741672	cluster:58953	182	-	chr1	84717764	84835879	ENSMUSG00000026219.8	Trip12	-	6
chr1	84742033	84742050	cluster:58965	74	-	chr1	84717764	84835879	ENSMUSG00000026219.8	Trip12	-	17
chr1	84743779	84743790	cluster:58994	157	-	chr1	84717764	84835879	ENSMUSG00000026219.8	Trip12	-	11
chr1	84744484	84744493	cluster:59008	142	-	chr1	84717764	84835879	ENSMUSG00000026219.8	Trip12	-	9
chr1	84745117	84745121	cluster:59027	68	-	chr1	84717764	84835879	ENSMUSG00000026219.8	Trip12	-	4
chr1	84745310	84745319	cluster:59031	77	-	chr1	84717764	84835879	ENSMUSG00000026219.8	Trip12	-	9
chr1	84745512	84745535	cluster:59038	94	-	chr1	84717764	84835879	ENSMUSG00000026219.8	Trip12	-	23
chr1	84745638	84745654	cluster:59039	66	-	chr1	84717764	84835879	ENSMUSG00000026219.8	Trip12	-	16
chr1	84745739	84745773	cluster:59041	249	-	chr1	84717764	84835879	ENSMUSG00000026219.8	Trip12	-	34
chr1	84745844	84745880	cluster:59043	859	-	chr1	84717764	84835879	ENSMUSG00000026219.8	Trip12	-	36
chr1	84747020	84747040	cluster:59059	61	-	chr1	84717764	84835879	ENSMUSG00000026219.8	Trip12	-	20
chr1	84747750	84747766	cluster:59074	57	-	chr1	84717764	84835879	ENSMUSG00000026219.8	Trip12	-	16
chr1	84747839	84747851	cluster:59076	56	-	chr1	84717764	84835879	ENSMUSG00000026219.8	Trip12	-	12
chr1	84748129	84748139	cluster:59083	53	-	chr1	84717764	84835879	ENSMUSG00000026219.8	Trip12	-	10
chr1	84748185	84748227	cluster:59085	319	-	chr1	84717764	84835879	ENSMUSG00000026219.8	Trip12	-	42
chr1	84748256	84748266	cluster:59087	72	-	chr1	84717764	84835879	ENSMUSG00000026219.8	Trip12	-	10
chr1	84748493	84748508	cluster:59091	232	-	chr1	84717764	84835879	ENSMUSG00000026219.8	Trip12	-	15
chr1	84748536	84748553	cluster:59092	71	-	chr1	84717764	84835879	ENSMUSG00000026219.8	Trip12	-	17
chr1	84750754	84750758	cluster:59124	62	-	chr1	84717764	84835879	ENSMUSG00000026219.8	Trip12	-	4
chr1	84750860	84750885	cluster:59126	165	-	chr1	84717764	84835879	ENSMUSG00000026219.8	Trip12	-	25
chr1	84751006	84751016	cluster:59129	128	-	chr1	84717764	84835879	ENSMUSG00000026219.8	Trip12	-	10
chr1	84752523	84752537	cluster:59154	103	-	chr1	84717764	84835879	ENSMUSG00000026219.8	Trip12	-	14
chr1	84753534	84753550	cluster:59162	52	-	chr1	84717764	84835879	ENSMUSG00000026219.8	Trip12	-	16
chr1	84754349	84754376	cluster:59178	348	-	chr1	84717764	84835879	ENSMUSG00000026219.8	Trip12	-	27
chr1	84754403	84754446	cluster:59179	421	-	chr1	84717764	84835879	ENSMUSG00000026219.8	Trip12	-	43
chr1	84754498	84754512	cluster:59182	114	-	chr1	84717764	84835879	ENSMUSG00000026219.8	Trip12	-	14
chr1	84755556	84755601	cluster:59194	296	-	chr1	84717764	84835879	ENSMUSG00000026219.8	Trip12	-	45
chr1	84755626	84755648	cluster:59195	115	-	chr1	84717764	84835879	ENSMUSG00000026219.8	Trip12	-	22
chr1	84756020	84756031	cluster:59210	90	-	chr1	84717764	84835879	ENSMUSG00000026219.8	Trip12	-	11
chr1	84756170	84756196	cluster:59214	198	-	chr1	84717764	84835879	ENSMUSG00000026219.8	Trip12	-	26
chr1	84756235	84756251	cluster:59216	43	-	chr1	84717764	84835879	ENSMUSG00000026219.8	Trip12	-	16
chr1	84756269	84756282	cluster:59217	48	-	chr1	84717764	84835879	ENSMUSG00000026219.8	Trip12	-	13
chr1	84756631	84756651	cluster:59228	64	-	chr1	84717764	84835879	ENSMUSG00000026219.8	Trip12	-	20
chr1	84756785	84756802	cluster:59231	123	-	chr1	84717764	84835879	ENSMUSG00000026219.8	Trip12	-	17
chr1	84756842	84756862	cluster:59232	51	-	chr1	84717764	84835879	ENSMUSG00000026219.8	Trip12	-	20
chr1	84756981	84756993	cluster:59236	75	-	chr1	84717764	84835879	ENSMUSG00000026219.8	Trip12	-	12
chr1	84757299	84757312	cluster:59242	138	-	chr1	84717764	84835879	ENSMUSG00000026219.8	Trip12	-	13
chr1	84757328	84757373	cluster:59243	219	-	chr1	84717764	84835879	ENSMUSG00000026219.8	Trip12	-	45
chr1	84757384	84757423	cluster:59244	427	-	chr1	84717764	84835879	ENSMUSG00000026219.8	Trip12	-	39
chr1	84757453	84757460	cluster:59246	38	-	chr1	84717764	84835879	ENSMUSG00000026219.8	Trip12	-	7
chr1	84757686	84757702	cluster:59253	126	-	chr1	84717764	84835879	ENSMUSG00000026219.8	Trip12	-	16
chr1	84758485	84758509	cluster:59261	208	-	chr1	84717764	84835879	ENSMUSG00000026219.8	Trip12	-	24
chr1	84758550	84758569	cluster:59263	89	-	chr1	84717764	84835879	ENSMUSG00000026219.8	Trip12	-	19
chr1	84758582	84758602	cluster:59264	206	-	chr1	84717764	84835879	ENSMUSG00000026219.8	Trip12	-	20
chr1	84758699	84758706	cluster:59265	49	-	chr1	84717764	84835879	ENSMUSG00000026219.8	Trip12	-	7
chr1	84759935	84759956	cluster:59280	148	-	chr1	84717764	84835879	ENSMUSG00000026219.8	Trip12	-	21
chr1	84760019	84760052	cluster:59282	348	-	chr1	84717764	84835879	ENSMUSG00000026219.8	Trip12	-	33
chr1	84760446	84760458	cluster:59285	141	-	chr1	84717764	84835879	ENSMUSG00000026219.8	Trip12	-	12
chr1	84762585	84762590	cluster:59304	124	-	chr1	84717764	84835879	ENSMUSG00000026219.8	Trip12	-	5
chr1	84762610	84762625	cluster:59305	145	-	chr1	84717764	84835879	ENSMUSG00000026219.8	Trip12	-	15
chr1	84762636	84762651	cluster:59306	64	-	chr1	84717764	84835879	ENSMUSG00000026219.8	Trip12	-	15
chr1	84762738	84762767	cluster:59308	332	-	chr1	84717764	84835879	ENSMUSG00000026219.8	Trip12	-	29
chr1	84764368	84764377	cluster:59326	84	-	chr1	84717764	84835879	ENSMUSG00000026219.8	Trip12	-	9
chr1	84764415	84764433	cluster:59327	79	-	chr1	84717764	84835879	ENSMUSG00000026219.8	Trip12	-	18
chr1	84765108	84765123	cluster:59339	67	-	chr1	84717764	84835879	ENSMUSG00000026219.8	Trip12	-	15
chr1	84765213	84765256	cluster:59342	241	-	chr1	84717764	84835879	ENSMUSG00000026219.8	Trip12	-	43
chr1	84765301	84765303	cluster:59343	38	-	chr1	84717764	84835879	ENSMUSG00000026219.8	Trip12	-	2
chr1	84767871	84767877	cluster:59380	72	-	chr1	84717764	84835879	ENSMUSG00000026219.8	Trip12	-	6
chr1	84769122	84769125	cluster:59396	40	-	chr1	84717764	84835879	ENSMUSG00000026219.8	Trip12	-	3
chr1	84771182	84771188	cluster:59415	82	-	chr1	84717764	84835879	ENSMUSG00000026219.8	Trip12	-	6
chr1	84771658	84771665	cluster:59425	87	-	chr1	84717764	84835879	ENSMUSG00000026219.8	Trip12	-	7
chr1	84771724	84771730	cluster:59427	133	-	chr1	84717764	84835879	ENSMUSG00000026219.8	Trip12	-	6
chr1	84772609	84772619	cluster:59436	64	-	chr1	84717764	84835879	ENSMUSG00000026219.8	Trip12	-	10
chr1	84772773	84772790	cluster:59439	71	-	chr1	84717764	84835879	ENSMUSG00000026219.8	Trip12	-	17
chr1	84772900	84772916	cluster:59443	114	-	chr1	84717764	84835879	ENSMUSG00000026219.8	Trip12	-	16
chr1	84772942	84772960	cluster:59444	199	-	chr1	84717764	84835879	ENSMUSG00000026219.8	Trip12	-	18
chr1	84772979	84772999	cluster:59445	151	-	chr1	84717764	84835879	ENSMUSG00000026219.8	Trip12	-	20
chr1	84773839	84773843	cluster:59454	85	-	chr1	84717764	84835879	ENSMUSG00000026219.8	Trip12	-	4
chr1	84774001	84774006	cluster:59457	148	-	chr1	84717764	84835879	ENSMUSG00000026219.8	Trip12	-	5
chr1	84774064	84774074	cluster:59460	256	-	chr1	84717764	84835879	ENSMUSG00000026219.8	Trip12	-	10
chr1	84774203	84774218	cluster:59463	88	-	chr1	84717764	84835879	ENSMUSG00000026219.8	Trip12	-	15
chr1	84774504	84774530	cluster:59470	88	-	chr1	84717764	84835879	ENSMUSG00000026219.8	Trip12	-	26
chr1	84777375	84777399	cluster:59512	51	-	chr1	84717764	84835879	ENSMUSG00000026219.8	Trip12	-	24
chr1	84779012	84779032	cluster:59544	105	-	chr1	84717764	84835879	ENSMUSG00000026219.8	Trip12	-	20
chr1	84779512	84779548	cluster:59555	198	-	chr1	84717764	84835879	ENSMUSG00000026219.8	Trip12	-	36
chr1	84782707	84782717	cluster:59583	201	-	chr1	84717764	84835879	ENSMUSG00000026219.8	Trip12	-	10
chr1	84782732	84782770	cluster:59584	237	-	chr1	84717764	84835879	ENSMUSG00000026219.8	Trip12	-	38
chr1	84789807	84789839	cluster:59642	75	-	chr1	84717764	84835879	ENSMUSG00000026219.8	Trip12	-	32
chr1	84790132	84790178	cluster:59651	191	-	chr1	84717764	84835879	ENSMUSG00000026219.8	Trip12	-	46
chr1	84790221	84790228	cluster:59653	80	-	chr1	84717764	84835879	ENSMUSG00000026219.8	Trip12	-	7
chr1	84790240	84790259	cluster:59654	108	-	chr1	84717764	84835879	ENSMUSG00000026219.8	Trip12	-	19
chr1	84790272	84790297	cluster:59655	152	-	chr1	84717764	84835879	ENSMUSG00000026219.8	Trip12	-	25
chr1	84790377	84790417	cluster:59658	139	-	chr1	84717764	84835879	ENSMUSG00000026219.8	Trip12	-	40
chr1	84790529	84790538	cluster:59661	90	-	chr1	84717764	84835879	ENSMUSG00000026219.8	Trip12	-	9
chr1	84790587	84790601	cluster:59663	116	-	chr1	84717764	84835879	ENSMUSG00000026219.8	Trip12	-	14
chr1	84790623	84790642	cluster:59664	141	-	chr1	84717764	84835879	ENSMUSG00000026219.8	Trip12	-	19
chr1	84790732	84790750	cluster:59668	203	-	chr1	84717764	84835879	ENSMUSG00000026219.8	Trip12	-	18
chr1	84790769	84790797	cluster:59669	142	-	chr1	84717764	84835879	ENSMUSG00000026219.8	Trip12	-	28
chr1	84790867	84790877	cluster:59672	50	-	chr1	84717764	84835879	ENSMUSG00000026219.8	Trip12	-	10
chr1	84792291	84792307	cluster:59685	76	-	chr1	84717764	84835879	ENSMUSG00000026219.8	Trip12	-	16
chr1	84795305	84795314	cluster:59718	75	-	chr1	84717764	84835879	ENSMUSG00000026219.8	Trip12	-	9
chr1	84796862	84796881	cluster:59741	64	-	chr1	84717764	84835879	ENSMUSG00000026219.8	Trip12	-	19
chr1	84798992	84799011	cluster:59764	103	-	chr1	84717764	84835879	ENSMUSG00000026219.8	Trip12	-	19
chr1	84801268	84801280	cluster:59784	57	-	chr1	84717764	84835879	ENSMUSG00000026219.8	Trip12	-	12
chr1	84803488	84803505	cluster:59812	54	-	chr1	84717764	84835879	ENSMUSG00000026219.8	Trip12	-	17
chr1	84804459	84804486	cluster:59821	48	-	chr1	84717764	84835879	ENSMUSG00000026219.8	Trip12	-	27
chr1	84804977	84804993	cluster:59828	45	-	chr1	84717764	84835879	ENSMUSG00000026219.8	Trip12	-	16
chr1	84806096	84806114	cluster:59843	99	-	chr1	84717764	84835879	ENSMUSG00000026219.8	Trip12	-	18
chr1	84806217	84806224	cluster:59844	63	-	chr1	84717764	84835879	ENSMUSG00000026219.8	Trip12	-	7
chr1	84806732	84806742	cluster:59852	82	-	chr1	84717764	84835879	ENSMUSG00000026219.8	Trip12	-	10
chr1	84810486	84810493	cluster:59887	34	-	chr1	84717764	84835879	ENSMUSG00000026219.8	Trip12	-	7
chr1	84811448	84811453	cluster:59903	161	-	chr1	84717764	84835879	ENSMUSG00000026219.8	Trip12	-	5
chr1	84811468	84811508	cluster:59904	126	-	chr1	84717764	84835879	ENSMUSG00000026219.8	Trip12	-	40
chr1	84818799	84818817	cluster:59961	65	-	chr1	84717764	84835879	ENSMUSG00000026219.8	Trip12	-	18
chr1	84830577	84830583	cluster:60056	58	-	chr1	84717764	84835879	ENSMUSG00000026219.8	Trip12	-	6
chr1	84833108	84833117	cluster:60082	43	-	chr1	84717764	84835879	ENSMUSG00000026219.8	Trip12	-	9
chr1	84835839	84835854	cluster:60123	58	-	chr1	84717764	84835879	ENSMUSG00000026219.8	Trip12	-	15
chr1	87738812	87738824	cluster:60498	48	+	chr1	87690016	87748151	ENSMUSG00000036707.9	Cab39	+	12
chr1	87968467	87968473	cluster:60652	83	+	chr1	87960962	88059363	ENSMUSG00000026229.10	Psmd1	+	6
chr1	87972500	87972520	cluster:60670	104	+	chr1	87960962	88059363	ENSMUSG00000026229.10	Psmd1	+	20
chr1	87972556	87972569	cluster:60671	142	+	chr1	87960962	88059363	ENSMUSG00000026229.10	Psmd1	+	13
chr1	87975235	87975247	cluster:60687	158	+	chr1	87960962	88059363	ENSMUSG00000026229.10	Psmd1	+	12
chr1	87979755	87979775	cluster:60705	96	+	chr1	87960962	88059363	ENSMUSG00000026229.10	Psmd1	+	20
chr1	87985463	87985475	cluster:60738	87	+	chr1	87960962	88059363	ENSMUSG00000026229.10	Psmd1	+	12
chr1	87997333	87997353	cluster:60802	70	+	chr1	87960962	88059363	ENSMUSG00000026229.10	Psmd1	+	20
chr1	88015149	88015166	cluster:60869	59	+	chr1	87960962	88059363	ENSMUSG00000026229.10	Psmd1	+	17
chr1	88024807	88024845	cluster:60909	205	+	chr1	87960962	88059363	ENSMUSG00000026229.10	Psmd1	+	38
chr1	88027239	88027254	cluster:60919	63	+	chr1	87960962	88059363	ENSMUSG00000026229.10	Psmd1	+	15
chr1	88030240	88030268	cluster:60926	141	+	chr1	87960962	88059363	ENSMUSG00000026229.10	Psmd1	+	28
chr1	88035679	88035702	cluster:60945	139	+	chr1	87960962	88059363	ENSMUSG00000026229.10	Psmd1	+	23
chr1	88035720	88035747	cluster:60946	56	+	chr1	87960962	88059363	ENSMUSG00000026229.10	Psmd1	+	27
chr1	88035777	88035800	cluster:60947	137	+	chr1	87960962	88059363	ENSMUSG00000026229.10	Psmd1	+	23
chr1	88035815	88035826	cluster:60948	91	+	chr1	87960962	88059363	ENSMUSG00000026229.10	Psmd1	+	11
chr1	88202329	88202342	cluster:61144	55	+	chr1	88199796	88203878	ENSMUSG00000079445.2	B3gnt7	+	13
chr1	88203379	88203400	cluster:61167	102	+	chr1	88199796	88203878	ENSMUSG00000079445.2	B3gnt7	+	21
chr1	88242550	88242585	cluster:61203	86	-	chr1	88241294	88256030	ENSMUSG00000026234.6	Ncl	-	35
chr1	88243146	88243150	cluster:61210	46	-	chr1	88241294	88256030	ENSMUSG00000026234.6	Ncl	-	4
chr1	88244074	88244091	cluster:61218	187	-	chr1	88241294	88256030	ENSMUSG00000026234.6	Ncl	-	17
chr1	88244724	88244732	cluster:61225	28	-	chr1	88241294	88256030	ENSMUSG00000026234.6	Ncl	-	8
chr1	88245140	88245158	cluster:61236	98	-	chr1	88241294	88256030	ENSMUSG00000026234.6	Ncl	-	18
chr1	88246076	88246098	cluster:61256	88	-	chr1	88241294	88256030	ENSMUSG00000026234.6	Ncl	-	22
chr1	88246109	88246135	cluster:61257	309	-	chr1	88241294	88256030	ENSMUSG00000026234.6	Ncl	-	26
chr1	88246157	88246177	cluster:61258	147	-	chr1	88241294	88256030	ENSMUSG00000026234.6	Ncl	-	20
chr1	88246288	88246292	cluster:61262	123	-	chr1	88241294	88256030	ENSMUSG00000026234.6	Ncl	-	4
chr1	88246537	88246552	cluster:61268	60	-	chr1	88241294	88256030	ENSMUSG00000026234.6	Ncl	-	15
chr1	88246724	88246727	cluster:61273	68	-	chr1	88241294	88256030	ENSMUSG00000026234.6	Ncl	-	3
chr1	88246881	88246919	cluster:61277	251	-	chr1	88241294	88256030	ENSMUSG00000026234.6	Ncl	-	38
chr1	88247079	88247182	cluster:61283	898	-	chr1	88241294	88256030	ENSMUSG00000026234.6	Ncl	-	103
chr1	88247228	88247278	cluster:61286	460	-	chr1	88241294	88256030	ENSMUSG00000026234.6	Ncl	-	50
chr1	88247392	88247417	cluster:61288	126	-	chr1	88241294	88256030	ENSMUSG00000026234.6	Ncl	-	25
chr1	88247529	88247551	cluster:61292	126	-	chr1	88241294	88256030	ENSMUSG00000026234.6	Ncl	-	22
chr1	88247647	88247665	cluster:61295	71	-	chr1	88241294	88256030	ENSMUSG00000026234.6	Ncl	-	18
chr1	88247779	88247787	cluster:61297	65	-	chr1	88241294	88256030	ENSMUSG00000026234.6	Ncl	-	8
chr1	88247864	88247878	cluster:61301	578	-	chr1	88241294	88256030	ENSMUSG00000026234.6	Ncl	-	14
chr1	88247939	88248009	cluster:61303	613	-	chr1	88241294	88256030	ENSMUSG00000026234.6	Ncl	-	70
chr1	88248021	88248048	cluster:61304	152	-	chr1	88241294	88256030	ENSMUSG00000026234.6	Ncl	-	27
chr1	88248478	88248539	cluster:61308	163	-	chr1	88241294	88256030	ENSMUSG00000026234.6	Ncl	-	61
chr1	88248720	88248737	cluster:61314	160	-	chr1	88241294	88256030	ENSMUSG00000026234.6	Ncl	-	17
chr1	88248779	88248794	cluster:61316	132	-	chr1	88241294	88256030	ENSMUSG00000026234.6	Ncl	-	15
chr1	88248806	88248815	cluster:61317	87	-	chr1	88241294	88256030	ENSMUSG00000026234.6	Ncl	-	9
chr1	88248856	88248900	cluster:61320	227	-	chr1	88241294	88256030	ENSMUSG00000026234.6	Ncl	-	44
chr1	88249095	88249128	cluster:61326	184	-	chr1	88241294	88256030	ENSMUSG00000026234.6	Ncl	-	33
chr1	88249139	88249212	cluster:61327	425	-	chr1	88241294	88256030	ENSMUSG00000026234.6	Ncl	-	73
chr1	88249684	88249700	cluster:61341	43	-	chr1	88241294	88256030	ENSMUSG00000026234.6	Ncl	-	16
chr1	88249716	88249741	cluster:61342	146	-	chr1	88241294	88256030	ENSMUSG00000026234.6	Ncl	-	25
chr1	88249753	88249783	cluster:61343	152	-	chr1	88241294	88256030	ENSMUSG00000026234.6	Ncl	-	30
chr1	88249820	88249848	cluster:61345	406	-	chr1	88241294	88256030	ENSMUSG00000026234.6	Ncl	-	28
chr1	88250265	88250274	cluster:61355	91	-	chr1	88241294	88256030	ENSMUSG00000026234.6	Ncl	-	9
chr1	88250315	88250350	cluster:61356	262	-	chr1	88241294	88256030	ENSMUSG00000026234.6	Ncl	-	35
chr1	88250369	88250392	cluster:61357	230	-	chr1	88241294	88256030	ENSMUSG00000026234.6	Ncl	-	23
chr1	88250404	88250444	cluster:61358	305	-	chr1	88241294	88256030	ENSMUSG00000026234.6	Ncl	-	40
chr1	88250529	88250550	cluster:61361	61	-	chr1	88241294	88256030	ENSMUSG00000026234.6	Ncl	-	21
chr1	88250830	88250842	cluster:61370	85	-	chr1	88241294	88256030	ENSMUSG00000026234.6	Ncl	-	12
chr1	88250871	88250905	cluster:61371	179	-	chr1	88241294	88256030	ENSMUSG00000026234.6	Ncl	-	34
chr1	88251588	88251616	cluster:61378	202	-	chr1	88241294	88256030	ENSMUSG00000026234.6	Ncl	-	28
chr1	88251708	88251724	cluster:61381	94	-	chr1	88241294	88256030	ENSMUSG00000026234.6	Ncl	-	16
chr1	88251800	88251845	cluster:61384	243	-	chr1	88241294	88256030	ENSMUSG00000026234.6	Ncl	-	45
chr1	88252187	88252202	cluster:61388	59	-	chr1	88241294	88256030	ENSMUSG00000026234.6	Ncl	-	15
chr1	88252484	88252488	cluster:61397	64	-	chr1	88241294	88256030	ENSMUSG00000026234.6	Ncl	-	4
chr1	88252630	88252775	cluster:61402	1261	-	chr1	88241294	88256030	ENSMUSG00000026234.6	Ncl	-	145
chr1	88252859	88252905	cluster:61404	1309	-	chr1	88241294	88256030	ENSMUSG00000026234.6	Ncl	-	46
chr1	88253140	88253182	cluster:61411	443	-	chr1	88241294	88256030	ENSMUSG00000026234.6	Ncl	-	42
chr1	88253230	88253290	cluster:61413	181	-	chr1	88241294	88256030	ENSMUSG00000026234.6	Ncl	-	60
chr1	88253785	88253944	cluster:61423	1555	-	chr1	88241294	88256030	ENSMUSG00000026234.6	Ncl	-	159
chr1	88253956	88253980	cluster:61424	297	-	chr1	88241294	88256030	ENSMUSG00000026234.6	Ncl	-	24
chr1	88254000	88254021	cluster:61425	187	-	chr1	88241294	88256030	ENSMUSG00000026234.6	Ncl	-	21
chr1	88254333	88254346	cluster:61429	114	-	chr1	88241294	88256030	ENSMUSG00000026234.6	Ncl	-	13
chr1	88254669	88254676	cluster:61434	104	-	chr1	88241294	88256030	ENSMUSG00000026234.6	Ncl	-	7
chr1	88254687	88254717	cluster:61435	275	-	chr1	88241294	88256030	ENSMUSG00000026234.6	Ncl	-	30
chr1	88254754	88254758	cluster:61437	51	-	chr1	88241294	88256030	ENSMUSG00000026234.6	Ncl	-	4
chr1	88255793	88255811	cluster:61452	159	-	chr1	88241294	88256030	ENSMUSG00000026234.6	Ncl	-	18
chr1	88255824	88255953	cluster:61453	1299	-	chr1	88241294	88256030	ENSMUSG00000026234.6	Ncl	-	129
chr1	88424112	88424121	cluster:61629	82	+	chr1	88423311	88427273	ENSMUSG00000026238.8	Ptma	+	9
chr1	88424151	88424160	cluster:61630	233	+	chr1	88423311	88427273	ENSMUSG00000026238.8	Ptma	+	9
chr1	88424541	88424554	cluster:61638	102	+	chr1	88423311	88427273	ENSMUSG00000026238.8	Ptma	+	13
chr1	88425063	88425079	cluster:61647	128	+	chr1	88423311	88427273	ENSMUSG00000026238.8	Ptma	+	16
chr1	88425173	88425181	cluster:61651	81	+	chr1	88423311	88427273	ENSMUSG00000026238.8	Ptma	+	8
chr1	88425686	88425707	cluster:61668	63	+	chr1	88423311	88427273	ENSMUSG00000026238.8	Ptma	+	21
chr1	88425853	88425872	cluster:61671	150	+	chr1	88423311	88427273	ENSMUSG00000026238.8	Ptma	+	19
chr1	88425915	88425925	cluster:61672	118	+	chr1	88423311	88427273	ENSMUSG00000026238.8	Ptma	+	10
chr1	88425972	88425981	cluster:61674	209	+	chr1	88423311	88427273	ENSMUSG00000026238.8	Ptma	+	9
chr1	88426157	88426171	cluster:61676	154	+	chr1	88423311	88427273	ENSMUSG00000026238.8	Ptma	+	14
chr1	88427171	88427191	cluster:61691	464	+	chr1	88423311	88427273	ENSMUSG00000026238.8	Ptma	+	20
chr1	89114199	89114213	cluster:62501	80	+	chr1	89110489	89137063	ENSMUSG00000026254.10	Eif4e2	+	14
chr1	89114817	89114833	cluster:62506	42	+	chr1	89110489	89137063	ENSMUSG00000026254.10	Eif4e2	+	16
chr1	89120945	89120958	cluster:62536	83	+	chr1	89110489	89137063	ENSMUSG00000026254.10	Eif4e2	+	13
chr1	89120990	89121022	cluster:62538	183	+	chr1	89110489	89137063	ENSMUSG00000026254.10	Eif4e2	+	32
chr1	89122667	89122687	cluster:62548	90	+	chr1	89110489	89137063	ENSMUSG00000026254.10	Eif4e2	+	20
chr1	89122714	89122736	cluster:62550	61	+	chr1	89110489	89137063	ENSMUSG00000026254.10	Eif4e2	+	22
chr1	89122773	89122810	cluster:62552	474	+	chr1	89110489	89137063	ENSMUSG00000026254.10	Eif4e2	+	37
chr1	89123049	89123061	cluster:62557	51	+	chr1	89110489	89137063	ENSMUSG00000026254.10	Eif4e2	+	12
chr1	89123251	89123272	cluster:62562	99	+	chr1	89110489	89137063	ENSMUSG00000026254.10	Eif4e2	+	21
chr1	89123405	89123423	cluster:62566	70	+	chr1	89110489	89137063	ENSMUSG00000026254.10	Eif4e2	+	18
chr1	89124087	89124100	cluster:62576	58	+	chr1	89110489	89137063	ENSMUSG00000026254.10	Eif4e2	+	13
chr1	89124423	89124436	cluster:62583	151	+	chr1	89110489	89137063	ENSMUSG00000026254.10	Eif4e2	+	13
chr1	89124565	89124598	cluster:62587	1013	+	chr1	89110489	89137063	ENSMUSG00000026254.10	Eif4e2	+	33
chr1	89128881	89128903	cluster:62629	99	+	chr1	89110489	89137063	ENSMUSG00000026254.10	Eif4e2	+	22
chr1	89131677	89131700	cluster:62649	46	+	chr1	89110489	89137063	ENSMUSG00000026254.10	Eif4e2	+	23
chr1	89235402	89235413	cluster:62799	69	+	chr1	89223573	89347371	ENSMUSG00000048000.8	Gigyf2	+	11
chr1	89237402	89237419	cluster:62811	143	+	chr1	89223573	89347371	ENSMUSG00000048000.8	Gigyf2	+	17
chr1	89252983	89252991	cluster:62885	64	+	chr1	89223573	89347371	ENSMUSG00000048000.8	Gigyf2	+	8
chr1	89262682	89262694	cluster:62966	43	+	chr1	89223573	89347371	ENSMUSG00000048000.8	Gigyf2	+	12
chr1	89325183	89325207	cluster:63327	118	+	chr1	89223573	89347371	ENSMUSG00000048000.8	Gigyf2	+	24
chr1	89328059	89328066	cluster:63353	58	+	chr1	89223573	89347371	ENSMUSG00000048000.8	Gigyf2	+	7
chr1	89345787	89345800	cluster:63429	120	+	chr1	89223573	89347371	ENSMUSG00000048000.8	Gigyf2	+	13
chr1	89345846	89345857	cluster:63431	37	+	chr1	89223573	89347371	ENSMUSG00000048000.8	Gigyf2	+	11
chr1	89346503	89346516	cluster:63441	101	+	chr1	89223573	89347371	ENSMUSG00000048000.8	Gigyf2	+	13
chr1	89347094	89347099	cluster:63450	158	+	chr1	89223573	89347371	ENSMUSG00000048000.8	Gigyf2	+	5
chr1	89585412	89585427	cluster:63580	82	+	chr1	89516887	89617082	ENSMUSG00000026288.8	Inpp5d	+	15
chr1	89606135	89606152	cluster:63666	76	+	chr1	89516887	89617082	ENSMUSG00000026288.8	Inpp5d	+	17
chr1	89617024	89617032	cluster:63749	74	+	chr1	89516887	89617082	ENSMUSG00000026288.8	Inpp5d	+	8
chr1	89654504	89654521	cluster:63789	123	+	chr1	89652445	89689003	ENSMUSG00000026289.8	Atg16l1	+	17
chr1	89655083	89655088	cluster:63793	109	+	chr1	89652445	89689003	ENSMUSG00000026289.8	Atg16l1	+	5
chr1	89667510	89667516	cluster:63885	60	+	chr1	89652445	89689003	ENSMUSG00000026289.8	Atg16l1	+	6
chr1	89670729	89670731	cluster:63908	154	+	chr1	89652445	89689003	ENSMUSG00000026289.8	Atg16l1	+	2
chr1	89673519	89673549	cluster:63936	200	+	chr1	89652445	89689003	ENSMUSG00000026289.8	Atg16l1	+	30
chr1	89673562	89673578	cluster:63937	121	+	chr1	89652445	89689003	ENSMUSG00000026289.8	Atg16l1	+	16
chr1	89673589	89673596	cluster:63938	141	+	chr1	89652445	89689003	ENSMUSG00000026289.8	Atg16l1	+	7
chr1	89673639	89673646	cluster:63939	53	+	chr1	89652445	89689003	ENSMUSG00000026289.8	Atg16l1	+	7
chr1	89673678	89673686	cluster:63940	61	+	chr1	89652445	89689003	ENSMUSG00000026289.8	Atg16l1	+	8
chr1	89673698	89673729	cluster:63941	267	+	chr1	89652445	89689003	ENSMUSG00000026289.8	Atg16l1	+	31
chr1	89685403	89685415	cluster:64025	121	+	chr1	89652445	89689003	ENSMUSG00000026289.8	Atg16l1	+	12
chr1	89686259	89686275	cluster:64033	90	+	chr1	89652445	89689003	ENSMUSG00000026289.8	Atg16l1	+	16
chr1	89687204	89687211	cluster:64046	54	+	chr1	89652445	89689003	ENSMUSG00000026289.8	Atg16l1	+	7
chr1	89688356	89688359	cluster:64064	63	+	chr1	89652445	89689003	ENSMUSG00000026289.8	Atg16l1	+	3
chr1	89802712	89802718	cluster:64271	100	+	chr1	89749862	89841064	ENSMUSG00000070738.4	Dgkd	+	6
chr1	89822315	89822339	cluster:64373	118	+	chr1	89749862	89841064	ENSMUSG00000070738.4	Dgkd	+	24
chr1	90160884	90160894	cluster:64785	47	-	chr1	90155690	90174208	ENSMUSG00000044783.9	Hjurp	-	10
chr1	90161275	90161291	cluster:64790	35	-	chr1	90155690	90174208	ENSMUSG00000044783.9	Hjurp	-	16
chr1	90161452	90161479	cluster:64793	93	-	chr1	90155690	90174208	ENSMUSG00000044783.9	Hjurp	-	27
chr1	90161710	90161728	cluster:64800	103	-	chr1	90155690	90174208	ENSMUSG00000044783.9	Hjurp	-	18
chr1	90161948	90161961	cluster:64806	41	-	chr1	90155690	90174208	ENSMUSG00000044783.9	Hjurp	-	13
chr1	90162592	90162613	cluster:64821	77	-	chr1	90155690	90174208	ENSMUSG00000044783.9	Hjurp	-	21
chr1	90162878	90162890	cluster:64829	143	-	chr1	90155690	90174208	ENSMUSG00000044783.9	Hjurp	-	12
chr1	90163070	90163115	cluster:64834	272	-	chr1	90155690	90174208	ENSMUSG00000044783.9	Hjurp	-	45
chr1	90164304	90164317	cluster:64848	77	-	chr1	90155690	90174208	ENSMUSG00000044783.9	Hjurp	-	13
chr1	90165953	90165956	cluster:64875	54	-	chr1	90155690	90174208	ENSMUSG00000044783.9	Hjurp	-	3
chr1	90169939	90169947	cluster:64925	80	-	chr1	90155690	90174208	ENSMUSG00000044783.9	Hjurp	-	8
chr1	90170099	90170115	cluster:64929	129	-	chr1	90155690	90174208	ENSMUSG00000044783.9	Hjurp	-	16
chr1	90170209	90170232	cluster:64932	150	-	chr1	90155690	90174208	ENSMUSG00000044783.9	Hjurp	-	23
chr1	90170897	90170902	cluster:64952	142	-	chr1	90155690	90174208	ENSMUSG00000044783.9	Hjurp	-	5
chr1	90171562	90171586	cluster:64969	98	-	chr1	90155690	90174208	ENSMUSG00000044783.9	Hjurp	-	24
chr1	90171815	90171851	cluster:64979	90	-	chr1	90155690	90174208	ENSMUSG00000044783.9	Hjurp	-	36
chr1	90172250	90172255	cluster:64992	77	-	chr1	90155690	90174208	ENSMUSG00000044783.9	Hjurp	-	5
chr1	90172629	90172641	cluster:64999	57	-	chr1	90155690	90174208	ENSMUSG00000044783.9	Hjurp	-	12
chr1	90173184	90173213	cluster:65012	116	-	chr1	90155690	90174208	ENSMUSG00000044783.9	Hjurp	-	29
chr1	90173246	90173254	cluster:65013	144	-	chr1	90155690	90174208	ENSMUSG00000044783.9	Hjurp	-	8
chr1	90173798	90173820	cluster:65031	133	-	chr1	90155690	90174208	ENSMUSG00000044783.9	Hjurp	-	22
chr1	90173832	90173870	cluster:65032	108	-	chr1	90155690	90174208	ENSMUSG00000044783.9	Hjurp	-	38
chr1	90174036	90174045	cluster:65035	76	-	chr1	90155690	90174208	ENSMUSG00000044783.9	Hjurp	-	9
chr1	90971956	90971959	cluster:65269	67	+	chr1	90966990	91051643	ENSMUSG00000036206.6	Sh3bp4	+	3
chr1	91031321	91031324	cluster:65508	27	+	chr1	90966990	91051643	ENSMUSG00000036206.6	Sh3bp4	+	3
chr1	91380556	91380571	cluster:65922	94	+	chr1	91351381	91791857	ENSMUSG00000055013.7	Agap1	+	15
chr1	91394209	91394226	cluster:66041	130	+	chr1	91351381	91791857	ENSMUSG00000055013.7	Agap1	+	17
chr1	91403298	91403306	cluster:66100	115	+	chr1	91351381	91791857	ENSMUSG00000055013.7	Agap1	+	8
chr1	91406854	91406874	cluster:66136	99	+	chr1	91351381	91791857	ENSMUSG00000055013.7	Agap1	+	20
chr1	91455735	91455751	cluster:66441	50	+	chr1	91351381	91791857	ENSMUSG00000055013.7	Agap1	+	16
chr1	91824709	91824721	cluster:67294	59	-	chr1	91824537	91829865	ENSMUSG00000034486.7	Gbx2	-	12
chr1	93278529	93278542	cluster:68229	47	-	chr1	93271984	93295360	ENSMUSG00000026309.7	Ilkap	-	13
chr1	93284170	93284185	cluster:68277	66	-	chr1	93271984	93295360	ENSMUSG00000026309.7	Ilkap	-	15
chr1	93284587	93284598	cluster:68282	47	-	chr1	93271984	93295360	ENSMUSG00000026309.7	Ilkap	-	11
chr1	93829824	93829842	cluster:68690	83	-	chr1	93829334	94044970	ENSMUSG00000026313.8	Hdac4	-	18
chr1	94043784	94043793	cluster:69627	74	-	chr1	93829334	94044970	ENSMUSG00000026313.8	Hdac4	-	9
chr1	94044929	94044932	cluster:69640	86	-	chr1	93829334	94044970	ENSMUSG00000026313.8	Hdac4	-	3
chr1	95215481	95215493	cluster:70575	40	-	chr1	95205347	95240059	ENSMUSG00000026274.5	Pask	-	12
chr1	95302637	95302670	cluster:70814	92	-	chr1	95302517	95375385	ENSMUSG00000034088.9	Hdlbp	-	33
chr1	95303477	95303481	cluster:70827	126	-	chr1	95302517	95375385	ENSMUSG00000034088.9	Hdlbp	-	4
chr1	95303938	95303943	cluster:70839	57	-	chr1	95302517	95375385	ENSMUSG00000034088.9	Hdlbp	-	5
chr1	95304061	95304082	cluster:70842	192	-	chr1	95302517	95375385	ENSMUSG00000034088.9	Hdlbp	-	21
chr1	95304648	95304667	cluster:70854	118	-	chr1	95302517	95375385	ENSMUSG00000034088.9	Hdlbp	-	19
chr1	95305065	95305076	cluster:70863	51	-	chr1	95302517	95375385	ENSMUSG00000034088.9	Hdlbp	-	11
chr1	95305284	95305293	cluster:70865	70	-	chr1	95302517	95375385	ENSMUSG00000034088.9	Hdlbp	-	9
chr1	95305642	95305650	cluster:70872	106	-	chr1	95302517	95375385	ENSMUSG00000034088.9	Hdlbp	-	8
chr1	95308958	95308969	cluster:70891	122	-	chr1	95302517	95375385	ENSMUSG00000034088.9	Hdlbp	-	11
chr1	95309016	95309029	cluster:70892	152	-	chr1	95302517	95375385	ENSMUSG00000034088.9	Hdlbp	-	13
chr1	95309070	95309080	cluster:70893	57	-	chr1	95302517	95375385	ENSMUSG00000034088.9	Hdlbp	-	10
chr1	95313759	95313763	cluster:70945	58	-	chr1	95302517	95375385	ENSMUSG00000034088.9	Hdlbp	-	4
chr1	95317722	95317728	cluster:70985	151	-	chr1	95302517	95375385	ENSMUSG00000034088.9	Hdlbp	-	6
chr1	95317946	95317970	cluster:70992	171	-	chr1	95302517	95375385	ENSMUSG00000034088.9	Hdlbp	-	24
chr1	95317983	95317995	cluster:70993	50	-	chr1	95302517	95375385	ENSMUSG00000034088.9	Hdlbp	-	12
chr1	95325994	95326012	cluster:71068	124	-	chr1	95302517	95375385	ENSMUSG00000034088.9	Hdlbp	-	18
chr1	95326773	95326776	cluster:71074	35	-	chr1	95302517	95375385	ENSMUSG00000034088.9	Hdlbp	-	3
chr1	95326822	95326835	cluster:71076	66	-	chr1	95302517	95375385	ENSMUSG00000034088.9	Hdlbp	-	13
chr1	95327982	95328016	cluster:71089	157	-	chr1	95302517	95375385	ENSMUSG00000034088.9	Hdlbp	-	34
chr1	95328040	95328054	cluster:71090	77	-	chr1	95302517	95375385	ENSMUSG00000034088.9	Hdlbp	-	14
chr1	95333713	95333721	cluster:71112	40	-	chr1	95302517	95375385	ENSMUSG00000034088.9	Hdlbp	-	8
chr1	95379116	95379120	cluster:71322	34	+	chr1	95375541	95406837	ENSMUSG00000026276.10	2020-09-02	+	4
chr1	95379157	95379169	cluster:71323	36	+	chr1	95375541	95406837	ENSMUSG00000026276.10	2020-09-02	+	12
chr1	95382883	95382893	cluster:71344	99	+	chr1	95375541	95406837	ENSMUSG00000026276.10	2020-09-02	+	10
chr1	95387749	95387766	cluster:71382	99	+	chr1	95375541	95406837	ENSMUSG00000026276.10	2020-09-02	+	17
chr1	95387791	95387799	cluster:71383	55	+	chr1	95375541	95406837	ENSMUSG00000026276.10	2020-09-02	+	8
chr1	95395631	95395638	cluster:71429	81	+	chr1	95375541	95406837	ENSMUSG00000026276.10	2020-09-02	+	7
chr1	95400063	95400070	cluster:71466	82	+	chr1	95375541	95406837	ENSMUSG00000026276.10	2020-09-02	+	7
chr1	95404480	95404511	cluster:71505	472	+	chr1	95375541	95406837	ENSMUSG00000026276.10	2020-09-02	+	31
chr1	95404553	95404582	cluster:71507	143	+	chr1	95375541	95406837	ENSMUSG00000026276.10	2020-09-02	+	29
chr1	95404602	95404611	cluster:71508	102	+	chr1	95375541	95406837	ENSMUSG00000026276.10	2020-09-02	+	9
chr1	95404678	95404683	cluster:71510	54	+	chr1	95375541	95406837	ENSMUSG00000026276.10	2020-09-02	+	5
chr1	95404889	95404920	cluster:71518	83	+	chr1	95375541	95406837	ENSMUSG00000026276.10	2020-09-02	+	31
chr1	95405169	95405200	cluster:71526	256	+	chr1	95375541	95406837	ENSMUSG00000026276.10	2020-09-02	+	31
chr1	95405266	95405283	cluster:71527	114	+	chr1	95375541	95406837	ENSMUSG00000026276.10	2020-09-02	+	17
chr1	95405734	95405754	cluster:71532	74	+	chr1	95375541	95406837	ENSMUSG00000026276.10	2020-09-02	+	20
chr1	95405859	95405869	cluster:71535	66	+	chr1	95375541	95406837	ENSMUSG00000026276.10	2020-09-02	+	10
chr1	95406069	95406082	cluster:71540	52	+	chr1	95375541	95406837	ENSMUSG00000026276.10	2020-09-02	+	13
chr1	95518522	95518533	cluster:71616	40	-	chr1	95518479	95532299	ENSMUSG00000026277.7	Stk25	-	11
chr1	95522345	95522365	cluster:71655	82	-	chr1	95518479	95532299	ENSMUSG00000026277.7	Stk25	-	20
chr1	95523574	95523586	cluster:71666	57	-	chr1	95518479	95532299	ENSMUSG00000026277.7	Stk25	-	12
chr1	95523641	95523643	cluster:71668	36	-	chr1	95518479	95532299	ENSMUSG00000026277.7	Stk25	-	2
chr1	95524260	95524272	cluster:71676	225	-	chr1	95518479	95532299	ENSMUSG00000026277.7	Stk25	-	12
chr1	95525628	95525644	cluster:71686	59	-	chr1	95518479	95532299	ENSMUSG00000026277.7	Stk25	-	16
chr1	95635281	95635291	cluster:71840	48	-	chr1	95601968	95651415	ENSMUSG00000026279.7	Thap4	-	10
chr1	95689439	95689448	cluster:72009	58	-	chr1	95689153	95698511	ENSMUSG00000026281.9	Dtymk	-	9
chr1	95691951	95691962	cluster:72044	40	-	chr1	95689153	95698511	ENSMUSG00000026281.9	Dtymk	-	11
chr1	95694994	95695006	cluster:72080	72	-	chr1	95689153	95698511	ENSMUSG00000026281.9	Dtymk	-	12
chr1	95695677	95695681	cluster:72099	143	-	chr1	95689153	95698511	ENSMUSG00000026281.9	Dtymk	-	4
chr1	95695719	95695735	cluster:72100	218	-	chr1	95689153	95698511	ENSMUSG00000026281.9	Dtymk	-	16
chr1	95697213	95697249	cluster:72119	207	-	chr1	95689153	95698511	ENSMUSG00000026281.9	Dtymk	-	36
chr1	95697412	95697443	cluster:72126	116	-	chr1	95689153	95698511	ENSMUSG00000026281.9	Dtymk	-	31
chr1	95709263	95709265	cluster:72178	92	+	chr1	95700542	95718678	ENSMUSG00000026283.7	Ing5	+	2
chr1	95715451	95715459	cluster:72217	62	+	chr1	95700542	95718678	ENSMUSG00000026283.7	Ing5	+	8
chr1	95716896	95716909	cluster:72243	95	+	chr1	95700542	95718678	ENSMUSG00000026283.7	Ing5	+	13
chr1	95717912	95717918	cluster:72256	41	+	chr1	95700542	95718678	ENSMUSG00000026283.7	Ing5	+	6
chr1	99602805	99602819	cluster:73230	74	-	chr1	99602625	99666988	ENSMUSG00000040648.7	Ppip5k2	-	14
chr1	99603404	99603435	cluster:73243	68	-	chr1	99602625	99666988	ENSMUSG00000040648.7	Ppip5k2	-	31
chr1	99603556	99603597	cluster:73247	107	-	chr1	99602625	99666988	ENSMUSG00000040648.7	Ppip5k2	-	41
chr1	99612760	99612773	cluster:73304	43	-	chr1	99602625	99666988	ENSMUSG00000040648.7	Ppip5k2	-	13
chr1	99626523	99626533	cluster:73412	100	-	chr1	99602625	99666988	ENSMUSG00000040648.7	Ppip5k2	-	10
chr1	107438898	107438905	cluster:75064	77	-	chr1	107417716	107555585	ENSMUSG00000056536.7	Pign	-	7
chr1	107441499	107441514	cluster:75077	118	-	chr1	107417716	107555585	ENSMUSG00000056536.7	Pign	-	15
chr1	107552556	107552568	cluster:75442	50	-	chr1	107417716	107555585	ENSMUSG00000056536.7	Pign	-	12
chr1	107588637	107588641	cluster:75591	54	+	chr1	107560438	107651708	ENSMUSG00000026319.6	2310035C23Rik	+	4
chr1	107610493	107610500	cluster:75687	64	+	chr1	107560438	107651708	ENSMUSG00000026319.6	2310035C23Rik	+	7
chr1	107634917	107634928	cluster:75792	29	+	chr1	107560438	107651708	ENSMUSG00000026319.6	2310035C23Rik	+	11
chr1	107892987	107892992	cluster:75992	59	+	chr1	107886983	107930651	ENSMUSG00000038866.9	Zcchc2	+	5
chr1	108139294	108139310	cluster:76516	67	+	chr1	108068329	108290827	ENSMUSG00000044340.6	Phlpp1	+	16
chr1	108156861	108156865	cluster:76548	179	+	chr1	108068329	108290827	ENSMUSG00000044340.6	Phlpp1	+	4
chr1	108288818	108288822	cluster:76706	52	+	chr1	108068329	108290827	ENSMUSG00000044340.6	Phlpp1	+	4
chr1	108621170	108621182	cluster:76825	33	-	chr1	108616987	108656319	ENSMUSG00000009905.4	Kdsr	-	12
chr1	108668593	108668604	cluster:77053	45	-	chr1	108660648	108693305	ENSMUSG00000009907.10	Vps4b	-	11
chr1	108673029	108673032	cluster:77081	45	-	chr1	108660648	108693305	ENSMUSG00000009907.10	Vps4b	-	3
chr1	108683831	108683836	cluster:77167	50	-	chr1	108660648	108693305	ENSMUSG00000009907.10	Vps4b	-	5
chr1	108685820	108685835	cluster:77192	63	-	chr1	108660648	108693305	ENSMUSG00000009907.10	Vps4b	-	15
chr1	108693194	108693211	cluster:77241	98	-	chr1	108660648	108693305	ENSMUSG00000009907.10	Vps4b	-	17
chr1	113756463	113756465	cluster:78008	52	-	chr1	113755279	113761486	ENSMUSG00000038702.5	Dsel	-	2
chr1	113756778	113756796	cluster:78009	110	-	chr1	113755279	113761486	ENSMUSG00000038702.5	Dsel	-	18
chr1	113759717	113759749	cluster:78024	102	-	chr1	113755279	113761486	ENSMUSG00000038702.5	Dsel	-	32
chr1	115800563	115800626	cluster:78374	90	-	chr1	115787962	115860711	ENSMUSG00000086520.1	9330185C12Rik	-	63
chr1	115800703	115800745	cluster:78376	362	-	chr1	115787962	115860711	ENSMUSG00000086520.1	9330185C12Rik	-	42
chr1	115828182	115828202	cluster:78503	129	-	chr1	115787962	115860711	ENSMUSG00000086520.1	9330185C12Rik	-	20
chr1	115830494	115830505	cluster:78527	53	-	chr1	115787962	115860711	ENSMUSG00000086520.1	9330185C12Rik	-	11
chr1	115830800	115830812	cluster:78532	114	-	chr1	115787962	115860711	ENSMUSG00000086520.1	9330185C12Rik	-	12
chr1	115830906	115830930	cluster:78535	152	-	chr1	115787962	115860711	ENSMUSG00000086520.1	9330185C12Rik	-	24
chr1	115831110	115831125	cluster:78540	36	-	chr1	115787962	115860711	ENSMUSG00000086520.1	9330185C12Rik	-	15
chr1	115832524	115832530	cluster:78553	194	-	chr1	115787962	115860711	ENSMUSG00000086520.1	9330185C12Rik	-	6
chr1	115833456	115833473	cluster:78563	72	-	chr1	115787962	115860711	ENSMUSG00000086520.1	9330185C12Rik	-	17
chr1	115841724	115841739	cluster:78652	129	-	chr1	115787962	115860711	ENSMUSG00000086520.1	9330185C12Rik	-	15
chr1	115841768	115841781	cluster:78653	38	-	chr1	115787962	115860711	ENSMUSG00000086520.1	9330185C12Rik	-	13
chr1	115844022	115844025	cluster:78685	83	-	chr1	115787962	115860711	ENSMUSG00000086520.1	9330185C12Rik	-	3
chr1	115844365	115844388	cluster:78691	108	-	chr1	115787962	115860711	ENSMUSG00000086520.1	9330185C12Rik	-	23
chr1	115853404	115853412	cluster:78756	72	-	chr1	115787962	115860711	ENSMUSG00000086520.1	9330185C12Rik	-	8
chr1	115854490	115854503	cluster:78777	143	-	chr1	115787962	115860711	ENSMUSG00000086520.1	9330185C12Rik	-	13
chr1	115859121	115859135	cluster:78785	25	-	chr1	115787962	115860711	ENSMUSG00000086520.1	9330185C12Rik	-	14
chr1	115860028	115860045	cluster:78788	128	-	chr1	115787962	115860711	ENSMUSG00000086520.1	9330185C12Rik	-	17
chr1	115860117	115860129	cluster:78789	60	-	chr1	115787962	115860711	ENSMUSG00000086520.1	9330185C12Rik	-	12
chr1	120196121	120196141	cluster:79422	43	-	chr1	120195094	120207709	ENSMUSG00000026374.8	Tsn	-	20
chr1	120196175	120196179	cluster:79423	29	-	chr1	120195094	120207709	ENSMUSG00000026374.8	Tsn	-	4
chr1	120196850	120196877	cluster:79433	304	-	chr1	120195094	120207709	ENSMUSG00000026374.8	Tsn	-	27
chr1	120197026	120197040	cluster:79439	80	-	chr1	120195094	120207709	ENSMUSG00000026374.8	Tsn	-	14
chr1	120197257	120197278	cluster:79446	190	-	chr1	120195094	120207709	ENSMUSG00000026374.8	Tsn	-	21
chr1	120197533	120197566	cluster:79452	65	-	chr1	120195094	120207709	ENSMUSG00000026374.8	Tsn	-	33
chr1	120202687	120202693	cluster:79476	84	-	chr1	120195094	120207709	ENSMUSG00000026374.8	Tsn	-	6
chr1	120204024	120204036	cluster:79482	44	-	chr1	120195094	120207709	ENSMUSG00000026374.8	Tsn	-	12
chr1	120206414	120206420	cluster:79510	44	-	chr1	120195094	120207709	ENSMUSG00000026374.8	Tsn	-	6
chr1	120206629	120206641	cluster:79513	197	-	chr1	120195094	120207709	ENSMUSG00000026374.8	Tsn	-	12
chr1	120207492	120207495	cluster:79521	131	-	chr1	120195094	120207709	ENSMUSG00000026374.8	Tsn	-	3
chr1	120226083	120226102	cluster:79570	70	+	chr1	120218416	120230399	ENSMUSG00000026377.6	Mki67ip	+	19
chr1	120229575	120229583	cluster:79597	103	+	chr1	120218416	120230399	ENSMUSG00000026377.6	Mki67ip	+	8
chr1	120229694	120229711	cluster:79598	88	+	chr1	120218416	120230399	ENSMUSG00000026377.6	Mki67ip	+	17
chr1	120229724	120229735	cluster:79599	84	+	chr1	120218416	120230399	ENSMUSG00000026377.6	Mki67ip	+	11
chr1	120229804	120229824	cluster:79602	48	+	chr1	120218416	120230399	ENSMUSG00000026377.6	Mki67ip	+	20
chr1	120229894	120229902	cluster:79604	42	+	chr1	120218416	120230399	ENSMUSG00000026377.6	Mki67ip	+	8
chr1	120230127	120230141	cluster:79612	84	+	chr1	120218416	120230399	ENSMUSG00000026377.6	Mki67ip	+	14
chr1	120319404	120319412	cluster:79766	92	+	chr1	120285635	120506009	ENSMUSG00000064302.6	Clasp1	+	8
chr1	120341957	120341960	cluster:79878	41	+	chr1	120285635	120506009	ENSMUSG00000064302.6	Clasp1	+	3
chr1	120357777	120357782	cluster:79967	112	+	chr1	120285635	120506009	ENSMUSG00000064302.6	Clasp1	+	5
chr1	120444449	120444456	cluster:80323	114	+	chr1	120285635	120506009	ENSMUSG00000064302.6	Clasp1	+	7
chr1	120528840	120528868	cluster:80515	222	+	chr1	120524522	120581744	ENSMUSG00000026380.9	Tcfcp2l1	+	28
chr1	120528880	120528924	cluster:80516	380	+	chr1	120524522	120581744	ENSMUSG00000026380.9	Tcfcp2l1	+	44
chr1	120535167	120535178	cluster:80543	48	+	chr1	120524522	120581744	ENSMUSG00000026380.9	Tcfcp2l1	+	11
chr1	120536276	120536281	cluster:80553	147	+	chr1	120524522	120581744	ENSMUSG00000026380.9	Tcfcp2l1	+	5
chr1	120552947	120552953	cluster:80653	80	+	chr1	120524522	120581744	ENSMUSG00000026380.9	Tcfcp2l1	+	6
chr1	120555576	120555586	cluster:80678	89	+	chr1	120524522	120581744	ENSMUSG00000026380.9	Tcfcp2l1	+	10
chr1	120562618	120562621	cluster:80725	58	+	chr1	120524522	120581744	ENSMUSG00000026380.9	Tcfcp2l1	+	3
chr1	120565208	120565217	cluster:80744	124	+	chr1	120524522	120581744	ENSMUSG00000026380.9	Tcfcp2l1	+	9
chr1	120565963	120565983	cluster:80753	148	+	chr1	120524522	120581744	ENSMUSG00000026380.9	Tcfcp2l1	+	20
chr1	120568407	120568416	cluster:80774	153	+	chr1	120524522	120581744	ENSMUSG00000026380.9	Tcfcp2l1	+	9
chr1	120569515	120569523	cluster:80788	41	+	chr1	120524522	120581744	ENSMUSG00000026380.9	Tcfcp2l1	+	8
chr1	120574054	120574068	cluster:80826	110	+	chr1	120524522	120581744	ENSMUSG00000026380.9	Tcfcp2l1	+	14
chr1	120574091	120574120	cluster:80827	178	+	chr1	120524522	120581744	ENSMUSG00000026380.9	Tcfcp2l1	+	29
chr1	120574213	120574239	cluster:80830	158	+	chr1	120524522	120581744	ENSMUSG00000026380.9	Tcfcp2l1	+	26
chr1	120574283	120574304	cluster:80833	154	+	chr1	120524522	120581744	ENSMUSG00000026380.9	Tcfcp2l1	+	21
chr1	120574429	120574439	cluster:80838	48	+	chr1	120524522	120581744	ENSMUSG00000026380.9	Tcfcp2l1	+	10
chr1	120574512	120574532	cluster:80842	46	+	chr1	120524522	120581744	ENSMUSG00000026380.9	Tcfcp2l1	+	20
chr1	120574967	120575010	cluster:80851	209	+	chr1	120524522	120581744	ENSMUSG00000026380.9	Tcfcp2l1	+	43
chr1	120575036	120575059	cluster:80852	169	+	chr1	120524522	120581744	ENSMUSG00000026380.9	Tcfcp2l1	+	23
chr1	120575070	120575085	cluster:80853	91	+	chr1	120524522	120581744	ENSMUSG00000026380.9	Tcfcp2l1	+	15
chr1	120575333	120575377	cluster:80858	68	+	chr1	120524522	120581744	ENSMUSG00000026380.9	Tcfcp2l1	+	44
chr1	120575389	120575396	cluster:80859	88	+	chr1	120524522	120581744	ENSMUSG00000026380.9	Tcfcp2l1	+	7
chr1	120575586	120575612	cluster:80862	147	+	chr1	120524522	120581744	ENSMUSG00000026380.9	Tcfcp2l1	+	26
chr1	120575631	120575643	cluster:80863	200	+	chr1	120524522	120581744	ENSMUSG00000026380.9	Tcfcp2l1	+	12
chr1	120575740	120575760	cluster:80866	113	+	chr1	120524522	120581744	ENSMUSG00000026380.9	Tcfcp2l1	+	20
chr1	120576032	120576083	cluster:80870	511	+	chr1	120524522	120581744	ENSMUSG00000026380.9	Tcfcp2l1	+	51
chr1	120576298	120576320	cluster:80875	289	+	chr1	120524522	120581744	ENSMUSG00000026380.9	Tcfcp2l1	+	22
chr1	120577165	120577188	cluster:80892	230	+	chr1	120524522	120581744	ENSMUSG00000026380.9	Tcfcp2l1	+	23
chr1	120577232	120577234	cluster:80893	105	+	chr1	120524522	120581744	ENSMUSG00000026380.9	Tcfcp2l1	+	2
chr1	120577306	120577316	cluster:80897	135	+	chr1	120524522	120581744	ENSMUSG00000026380.9	Tcfcp2l1	+	10
chr1	120577333	120577352	cluster:80898	139	+	chr1	120524522	120581744	ENSMUSG00000026380.9	Tcfcp2l1	+	19
chr1	120577367	120577375	cluster:80899	92	+	chr1	120524522	120581744	ENSMUSG00000026380.9	Tcfcp2l1	+	8
chr1	120577396	120577411	cluster:80900	110	+	chr1	120524522	120581744	ENSMUSG00000026380.9	Tcfcp2l1	+	15
chr1	120577424	120577447	cluster:80901	79	+	chr1	120524522	120581744	ENSMUSG00000026380.9	Tcfcp2l1	+	23
chr1	120577510	120577555	cluster:80903	275	+	chr1	120524522	120581744	ENSMUSG00000026380.9	Tcfcp2l1	+	45
chr1	120577567	120577602	cluster:80904	276	+	chr1	120524522	120581744	ENSMUSG00000026380.9	Tcfcp2l1	+	35
chr1	120577617	120577633	cluster:80905	192	+	chr1	120524522	120581744	ENSMUSG00000026380.9	Tcfcp2l1	+	16
chr1	120578282	120578300	cluster:80911	69	+	chr1	120524522	120581744	ENSMUSG00000026380.9	Tcfcp2l1	+	18
chr1	120578695	120578708	cluster:80918	86	+	chr1	120524522	120581744	ENSMUSG00000026380.9	Tcfcp2l1	+	13
chr1	120578740	120578763	cluster:80919	141	+	chr1	120524522	120581744	ENSMUSG00000026380.9	Tcfcp2l1	+	23
chr1	120578802	120578817	cluster:80920	163	+	chr1	120524522	120581744	ENSMUSG00000026380.9	Tcfcp2l1	+	15
chr1	120578953	120578959	cluster:80924	81	+	chr1	120524522	120581744	ENSMUSG00000026380.9	Tcfcp2l1	+	6
chr1	120578971	120578999	cluster:80925	234	+	chr1	120524522	120581744	ENSMUSG00000026380.9	Tcfcp2l1	+	28
chr1	120579019	120579039	cluster:80926	102	+	chr1	120524522	120581744	ENSMUSG00000026380.9	Tcfcp2l1	+	20
chr1	120579331	120579355	cluster:80935	144	+	chr1	120524522	120581744	ENSMUSG00000026380.9	Tcfcp2l1	+	24
chr1	120579366	120579388	cluster:80936	64	+	chr1	120524522	120581744	ENSMUSG00000026380.9	Tcfcp2l1	+	22
chr1	120579435	120579439	cluster:80938	57	+	chr1	120524522	120581744	ENSMUSG00000026380.9	Tcfcp2l1	+	4
chr1	120579460	120579474	cluster:80939	112	+	chr1	120524522	120581744	ENSMUSG00000026380.9	Tcfcp2l1	+	14
chr1	120579539	120579557	cluster:80942	178	+	chr1	120524522	120581744	ENSMUSG00000026380.9	Tcfcp2l1	+	18
chr1	120579569	120579580	cluster:80943	128	+	chr1	120524522	120581744	ENSMUSG00000026380.9	Tcfcp2l1	+	11
chr1	120579594	120579626	cluster:80944	243	+	chr1	120524522	120581744	ENSMUSG00000026380.9	Tcfcp2l1	+	32
chr1	120579664	120579678	cluster:80946	102	+	chr1	120524522	120581744	ENSMUSG00000026380.9	Tcfcp2l1	+	14
chr1	120579711	120579722	cluster:80948	115	+	chr1	120524522	120581744	ENSMUSG00000026380.9	Tcfcp2l1	+	11
chr1	120579979	120579991	cluster:80955	178	+	chr1	120524522	120581744	ENSMUSG00000026380.9	Tcfcp2l1	+	12
chr1	120580005	120580029	cluster:80956	116	+	chr1	120524522	120581744	ENSMUSG00000026380.9	Tcfcp2l1	+	24
chr1	120580439	120580450	cluster:80963	147	+	chr1	120524522	120581744	ENSMUSG00000026380.9	Tcfcp2l1	+	11
chr1	120580516	120580541	cluster:80966	142	+	chr1	120524522	120581744	ENSMUSG00000026380.9	Tcfcp2l1	+	25
chr1	120580557	120580590	cluster:80967	78	+	chr1	120524522	120581744	ENSMUSG00000026380.9	Tcfcp2l1	+	33
chr1	120580665	120580684	cluster:80969	123	+	chr1	120524522	120581744	ENSMUSG00000026380.9	Tcfcp2l1	+	19
chr1	120580712	120580720	cluster:80970	63	+	chr1	120524522	120581744	ENSMUSG00000026380.9	Tcfcp2l1	+	8
chr1	120580734	120580746	cluster:80971	62	+	chr1	120524522	120581744	ENSMUSG00000026380.9	Tcfcp2l1	+	12
chr1	120580801	120580809	cluster:80973	104	+	chr1	120524522	120581744	ENSMUSG00000026380.9	Tcfcp2l1	+	8
chr1	120580838	120580844	cluster:80974	61	+	chr1	120524522	120581744	ENSMUSG00000026380.9	Tcfcp2l1	+	6
chr1	120580857	120580880	cluster:80975	248	+	chr1	120524522	120581744	ENSMUSG00000026380.9	Tcfcp2l1	+	23
chr1	120580901	120580917	cluster:80976	134	+	chr1	120524522	120581744	ENSMUSG00000026380.9	Tcfcp2l1	+	16
chr1	120581168	120581179	cluster:80985	50	+	chr1	120524522	120581744	ENSMUSG00000026380.9	Tcfcp2l1	+	11
chr1	120581331	120581343	cluster:80990	120	+	chr1	120524522	120581744	ENSMUSG00000026380.9	Tcfcp2l1	+	12
chr1	120581376	120581390	cluster:80992	75	+	chr1	120524522	120581744	ENSMUSG00000026380.9	Tcfcp2l1	+	14
chr1	120581402	120581422	cluster:80993	154	+	chr1	120524522	120581744	ENSMUSG00000026380.9	Tcfcp2l1	+	20
chr1	120581549	120581554	cluster:80998	103	+	chr1	120524522	120581744	ENSMUSG00000026380.9	Tcfcp2l1	+	5
chr1	120581577	120581592	cluster:80999	249	+	chr1	120524522	120581744	ENSMUSG00000026380.9	Tcfcp2l1	+	15
chr1	120581654	120581692	cluster:81001	58	+	chr1	120524522	120581744	ENSMUSG00000026380.9	Tcfcp2l1	+	38
chr1	120774675	120774683	cluster:81252	59	-	chr1	120730709	120950196	ENSMUSG00000048402.8	Gli2	-	8
chr1	120783043	120783064	cluster:81289	50	-	chr1	120730709	120950196	ENSMUSG00000048402.8	Gli2	-	21
chr1	120799823	120799825	cluster:81360	29	-	chr1	120730709	120950196	ENSMUSG00000048402.8	Gli2	-	2
chr1	120847180	120847194	cluster:81744	82	-	chr1	120730709	120950196	ENSMUSG00000048402.8	Gli2	-	14
chr1	120849124	120849131	cluster:81774	55	-	chr1	120730709	120950196	ENSMUSG00000048402.8	Gli2	-	7
chr1	120851993	120852002	cluster:81815	106	-	chr1	120730709	120950196	ENSMUSG00000048402.8	Gli2	-	9
chr1	120855238	120855250	cluster:81860	122	-	chr1	120730709	120950196	ENSMUSG00000048402.8	Gli2	-	12
chr1	120857893	120857900	cluster:81894	93	-	chr1	120730709	120950196	ENSMUSG00000048402.8	Gli2	-	7
chr1	120865544	120865558	cluster:81978	97	-	chr1	120730709	120950196	ENSMUSG00000048402.8	Gli2	-	14
chr1	120869158	120869167	cluster:82021	43	-	chr1	120730709	120950196	ENSMUSG00000048402.8	Gli2	-	9
chr1	120874769	120874780	cluster:82099	99	-	chr1	120730709	120950196	ENSMUSG00000048402.8	Gli2	-	11
chr1	120875683	120875691	cluster:82107	95	-	chr1	120730709	120950196	ENSMUSG00000048402.8	Gli2	-	8
chr1	120883050	120883062	cluster:82198	128	-	chr1	120730709	120950196	ENSMUSG00000048402.8	Gli2	-	12
chr1	120884893	120884903	cluster:82231	44	-	chr1	120730709	120950196	ENSMUSG00000048402.8	Gli2	-	10
chr1	120895936	120895949	cluster:82377	68	-	chr1	120730709	120950196	ENSMUSG00000048402.8	Gli2	-	13
chr1	120896906	120896929	cluster:82388	58	-	chr1	120730709	120950196	ENSMUSG00000048402.8	Gli2	-	23
chr1	120898506	120898509	cluster:82408	54	-	chr1	120730709	120950196	ENSMUSG00000048402.8	Gli2	-	3
chr1	120927065	120927077	cluster:82562	46	-	chr1	120730709	120950196	ENSMUSG00000048402.8	Gli2	-	12
chr1	120945670	120945674	cluster:82692	60	-	chr1	120730709	120950196	ENSMUSG00000048402.8	Gli2	-	4
chr1	120947724	120947736	cluster:82711	45	-	chr1	120730709	120950196	ENSMUSG00000048402.8	Gli2	-	12
chr1	120949943	120949961	cluster:82745	51	-	chr1	120730709	120950196	ENSMUSG00000048402.8	Gli2	-	18
chr1	121312247	121312301	cluster:83038	207	-	chr1	121312042	121318825	ENSMUSG00000037035.5	Inhbb	-	54
chr1	121312369	121312378	cluster:83040	282	-	chr1	121312042	121318825	ENSMUSG00000037035.5	Inhbb	-	9
chr1	121312571	121312580	cluster:83046	32	-	chr1	121312042	121318825	ENSMUSG00000037035.5	Inhbb	-	9
chr1	121312605	121312623	cluster:83047	153	-	chr1	121312042	121318825	ENSMUSG00000037035.5	Inhbb	-	18
chr1	121312902	121312915	cluster:83054	310	-	chr1	121312042	121318825	ENSMUSG00000037035.5	Inhbb	-	13
chr1	121313172	121313219	cluster:83062	383	-	chr1	121312042	121318825	ENSMUSG00000037035.5	Inhbb	-	47
chr1	121313678	121313697	cluster:83074	217	-	chr1	121312042	121318825	ENSMUSG00000037035.5	Inhbb	-	19
chr1	121313834	121313848	cluster:83079	83	-	chr1	121312042	121318825	ENSMUSG00000037035.5	Inhbb	-	14
chr1	121313860	121313863	cluster:83080	42	-	chr1	121312042	121318825	ENSMUSG00000037035.5	Inhbb	-	3
chr1	121314128	121314134	cluster:83089	109	-	chr1	121312042	121318825	ENSMUSG00000037035.5	Inhbb	-	6
chr1	121314393	121314408	cluster:83095	162	-	chr1	121312042	121318825	ENSMUSG00000037035.5	Inhbb	-	15
chr1	121314904	121314910	cluster:83109	128	-	chr1	121312042	121318825	ENSMUSG00000037035.5	Inhbb	-	6
chr1	121315743	121315757	cluster:83126	125	-	chr1	121312042	121318825	ENSMUSG00000037035.5	Inhbb	-	14
chr1	121315886	121315900	cluster:83129	139	-	chr1	121312042	121318825	ENSMUSG00000037035.5	Inhbb	-	14
chr1	121315958	121315980	cluster:83130	129	-	chr1	121312042	121318825	ENSMUSG00000037035.5	Inhbb	-	22
chr1	121316523	121316536	cluster:83140	154	-	chr1	121312042	121318825	ENSMUSG00000037035.5	Inhbb	-	13
chr1	121316776	121316817	cluster:83144	321	-	chr1	121312042	121318825	ENSMUSG00000037035.5	Inhbb	-	41
chr1	121318007	121318038	cluster:83170	92	-	chr1	121312042	121318825	ENSMUSG00000037035.5	Inhbb	-	31
chr1	121462677	121462684	cluster:83440	102	-	chr1	121441610	121545577	ENSMUSG00000026383.8	Epb4.1l5	-	7
chr1	121555664	121555676	cluster:83817	35	-	chr1	121554621	121734190	ENSMUSG00000026384.7	Ptpn4	-	12
chr1	121590838	121590842	cluster:83948	43	-	chr1	121554621	121734190	ENSMUSG00000026384.7	Ptpn4	-	4
chr1	121633761	121633764	cluster:84172	91	-	chr1	121554621	121734190	ENSMUSG00000026384.7	Ptpn4	-	3
chr1	121651606	121651620	cluster:84242	83	-	chr1	121554621	121734190	ENSMUSG00000026384.7	Ptpn4	-	14
chr1	121663274	121663279	cluster:84321	156	-	chr1	121554621	121734190	ENSMUSG00000026384.7	Ptpn4	-	5
chr1	121663389	121663399	cluster:84326	71	-	chr1	121554621	121734190	ENSMUSG00000026384.7	Ptpn4	-	10
chr1	121663440	121663456	cluster:84328	99	-	chr1	121554621	121734190	ENSMUSG00000026384.7	Ptpn4	-	16
chr1	121663626	121663638	cluster:84334	36	-	chr1	121554621	121734190	ENSMUSG00000026384.7	Ptpn4	-	12
chr1	121666712	121666720	cluster:84360	56	-	chr1	121554621	121734190	ENSMUSG00000026384.7	Ptpn4	-	8
chr1	121666758	121666760	cluster:84361	34	-	chr1	121554621	121734190	ENSMUSG00000026384.7	Ptpn4	-	2
chr1	121667261	121667278	cluster:84369	40	-	chr1	121554621	121734190	ENSMUSG00000026384.7	Ptpn4	-	17
chr1	121726748	121726754	cluster:84664	79	-	chr1	121554621	121734190	ENSMUSG00000026384.7	Ptpn4	-	6
chr1	121729120	121729127	cluster:84677	41	-	chr1	121554621	121734190	ENSMUSG00000026384.7	Ptpn4	-	7
chr1	122009888	122009890	cluster:84820	32	-	chr1	122009857	122017655	ENSMUSG00000026385.9	Dbi	-	2
chr1	122009902	122010001	cluster:84821	616	-	chr1	122009857	122017655	ENSMUSG00000026385.9	Dbi	-	99
chr1	122010045	122010069	cluster:84822	53	-	chr1	122009857	122017655	ENSMUSG00000026385.9	Dbi	-	24
chr1	122017567	122017588	cluster:84852	178	-	chr1	122009857	122017655	ENSMUSG00000026385.9	Dbi	-	21
chr1	122150241	122150248	cluster:84942	45	-	chr1	122087334	122169282	ENSMUSG00000026389.10	Steap3	-	7
chr1	127289945	127289956	cluster:86028	79	-	chr1	127289483	127332067	ENSMUSG00000026341.9	Actr3	-	11
chr1	127294047	127294070	cluster:86051	58	-	chr1	127289483	127332067	ENSMUSG00000026341.9	Actr3	-	23
chr1	127303934	127303943	cluster:86110	46	-	chr1	127289483	127332067	ENSMUSG00000026341.9	Actr3	-	9
chr1	127305277	127305282	cluster:86123	63	-	chr1	127289483	127332067	ENSMUSG00000026341.9	Actr3	-	5
chr1	129670841	129670843	cluster:87045	63	+	chr1	129670741	129704638	ENSMUSG00000026349.8	Ccnt2	+	2
chr1	129692153	129692170	cluster:87260	138	+	chr1	129670741	129704638	ENSMUSG00000026349.8	Ccnt2	+	17
chr1	129692258	129692278	cluster:87263	149	+	chr1	129670741	129704638	ENSMUSG00000026349.8	Ccnt2	+	20
chr1	129692552	129692568	cluster:87269	41	+	chr1	129670741	129704638	ENSMUSG00000026349.8	Ccnt2	+	16
chr1	129693172	129693194	cluster:87280	80	+	chr1	129670741	129704638	ENSMUSG00000026349.8	Ccnt2	+	22
chr1	129693709	129693720	cluster:87295	79	+	chr1	129670741	129704638	ENSMUSG00000026349.8	Ccnt2	+	11
chr1	129694313	129694327	cluster:87309	248	+	chr1	129670741	129704638	ENSMUSG00000026349.8	Ccnt2	+	14
chr1	129694691	129694711	cluster:87317	124	+	chr1	129670741	129704638	ENSMUSG00000026349.8	Ccnt2	+	20
chr1	129694938	129694942	cluster:87322	61	+	chr1	129670741	129704638	ENSMUSG00000026349.8	Ccnt2	+	4
chr1	129695133	129695136	cluster:87329	84	+	chr1	129670741	129704638	ENSMUSG00000026349.8	Ccnt2	+	3
chr1	129699085	129699090	cluster:87374	108	+	chr1	129670741	129704638	ENSMUSG00000026349.8	Ccnt2	+	5
chr1	129699790	129699811	cluster:87394	92	+	chr1	129670741	129704638	ENSMUSG00000026349.8	Ccnt2	+	21
chr1	129699925	129699940	cluster:87397	70	+	chr1	129670741	129704638	ENSMUSG00000026349.8	Ccnt2	+	15
chr1	129700124	129700143	cluster:87403	76	+	chr1	129670741	129704638	ENSMUSG00000026349.8	Ccnt2	+	19
chr1	129700229	129700238	cluster:87405	37	+	chr1	129670741	129704638	ENSMUSG00000026349.8	Ccnt2	+	9
chr1	129700609	129700615	cluster:87419	73	+	chr1	129670741	129704638	ENSMUSG00000026349.8	Ccnt2	+	6
chr1	129700655	129700659	cluster:87421	82	+	chr1	129670741	129704638	ENSMUSG00000026349.8	Ccnt2	+	4
chr1	129701262	129701275	cluster:87436	36	+	chr1	129670741	129704638	ENSMUSG00000026349.8	Ccnt2	+	13
chr1	129701702	129701709	cluster:87445	53	+	chr1	129670741	129704638	ENSMUSG00000026349.8	Ccnt2	+	7
chr1	129704409	129704421	cluster:87484	76	+	chr1	129670741	129704638	ENSMUSG00000026349.8	Ccnt2	+	12
chr1	130017354	130017367	cluster:88191	135	+	chr1	129999883	130134312	ENSMUSG00000056211.6	R3hdm1	+	13
chr1	130048483	130048490	cluster:88325	126	+	chr1	129999883	130134312	ENSMUSG00000056211.6	R3hdm1	+	7
chr1	130049849	130049859	cluster:88333	67	+	chr1	129999883	130134312	ENSMUSG00000056211.6	R3hdm1	+	10
chr1	130066666	130066673	cluster:88434	43	+	chr1	129999883	130134312	ENSMUSG00000056211.6	R3hdm1	+	7
chr1	130107813	130107826	cluster:88693	61	+	chr1	129999883	130134312	ENSMUSG00000056211.6	R3hdm1	+	13
chr1	130155465	130155468	cluster:88853	75	+	chr1	130140758	130175954	ENSMUSG00000026353.3	Ubxn4	+	3
chr1	130228271	130228306	cluster:88943	274	-	chr1	130228168	130256233	ENSMUSG00000026355.4	Mcm6	-	35
chr1	130228340	130228342	cluster:88945	47	-	chr1	130228168	130256233	ENSMUSG00000026355.4	Mcm6	-	2
chr1	130228364	130228373	cluster:88946	118	-	chr1	130228168	130256233	ENSMUSG00000026355.4	Mcm6	-	9
chr1	130228399	130228408	cluster:88947	50	-	chr1	130228168	130256233	ENSMUSG00000026355.4	Mcm6	-	9
chr1	130228448	130228498	cluster:88949	174	-	chr1	130228168	130256233	ENSMUSG00000026355.4	Mcm6	-	50
chr1	130228557	130228565	cluster:88951	87	-	chr1	130228168	130256233	ENSMUSG00000026355.4	Mcm6	-	8
chr1	130230155	130230172	cluster:88972	87	-	chr1	130228168	130256233	ENSMUSG00000026355.4	Mcm6	-	17
chr1	130231411	130231424	cluster:88977	87	-	chr1	130228168	130256233	ENSMUSG00000026355.4	Mcm6	-	13
chr1	130234834	130234852	cluster:89007	75	-	chr1	130228168	130256233	ENSMUSG00000026355.4	Mcm6	-	18
chr1	130235966	130235984	cluster:89022	120	-	chr1	130228168	130256233	ENSMUSG00000026355.4	Mcm6	-	18
chr1	130237989	130237993	cluster:89045	116	-	chr1	130228168	130256233	ENSMUSG00000026355.4	Mcm6	-	4
chr1	130239774	130239780	cluster:89054	110	-	chr1	130228168	130256233	ENSMUSG00000026355.4	Mcm6	-	6
chr1	130239880	130239893	cluster:89056	64	-	chr1	130228168	130256233	ENSMUSG00000026355.4	Mcm6	-	13
chr1	130240068	130240092	cluster:89060	100	-	chr1	130228168	130256233	ENSMUSG00000026355.4	Mcm6	-	24
chr1	130240888	130240929	cluster:89078	167	-	chr1	130228168	130256233	ENSMUSG00000026355.4	Mcm6	-	41
chr1	130242471	130242509	cluster:89095	113	-	chr1	130228168	130256233	ENSMUSG00000026355.4	Mcm6	-	38
chr1	130242525	130242542	cluster:89096	98	-	chr1	130228168	130256233	ENSMUSG00000026355.4	Mcm6	-	17
chr1	130245548	130245560	cluster:89123	219	-	chr1	130228168	130256233	ENSMUSG00000026355.4	Mcm6	-	12
chr1	130245914	130245917	cluster:89127	70	-	chr1	130228168	130256233	ENSMUSG00000026355.4	Mcm6	-	3
chr1	130245986	130246005	cluster:89129	141	-	chr1	130228168	130256233	ENSMUSG00000026355.4	Mcm6	-	19
chr1	130248016	130248026	cluster:89136	100	-	chr1	130228168	130256233	ENSMUSG00000026355.4	Mcm6	-	10
chr1	130250067	130250082	cluster:89160	246	-	chr1	130228168	130256233	ENSMUSG00000026355.4	Mcm6	-	15
chr1	130252132	130252145	cluster:89181	43	-	chr1	130228168	130256233	ENSMUSG00000026355.4	Mcm6	-	13
chr1	130252175	130252185	cluster:89182	146	-	chr1	130228168	130256233	ENSMUSG00000026355.4	Mcm6	-	10
chr1	130252222	130252236	cluster:89184	61	-	chr1	130228168	130256233	ENSMUSG00000026355.4	Mcm6	-	14
chr1	130253381	130253391	cluster:89190	132	-	chr1	130228168	130256233	ENSMUSG00000026355.4	Mcm6	-	10
chr1	130254412	130254434	cluster:89199	89	-	chr1	130228168	130256233	ENSMUSG00000026355.4	Mcm6	-	22
chr1	130260537	130260554	cluster:89238	59	-	chr1	130260285	130313993	ENSMUSG00000026356.9	Dars	-	17
chr1	130260796	130260827	cluster:89248	131	-	chr1	130260285	130313993	ENSMUSG00000026356.9	Dars	-	31
chr1	130260859	130260877	cluster:89250	136	-	chr1	130260285	130313993	ENSMUSG00000026356.9	Dars	-	18
chr1	130272825	130272846	cluster:89313	60	-	chr1	130260285	130313993	ENSMUSG00000026356.9	Dars	-	21
chr1	130275359	130275378	cluster:89322	85	-	chr1	130260285	130313993	ENSMUSG00000026356.9	Dars	-	19
chr1	130275408	130275432	cluster:89323	95	-	chr1	130260285	130313993	ENSMUSG00000026356.9	Dars	-	24
chr1	130283698	130283735	cluster:89360	156	-	chr1	130260285	130313993	ENSMUSG00000026356.9	Dars	-	37
chr1	133049818	133049822	cluster:90146	119	+	chr1	133049758	133084235	ENSMUSG00000026427.9	Eif2d	+	4
chr1	133049915	133049963	cluster:90150	202	+	chr1	133049758	133084235	ENSMUSG00000026427.9	Eif2d	+	48
chr1	133051743	133051746	cluster:90172	65	+	chr1	133049758	133084235	ENSMUSG00000026427.9	Eif2d	+	3
chr1	133052270	133052274	cluster:90184	68	+	chr1	133049758	133084235	ENSMUSG00000026427.9	Eif2d	+	4
chr1	133054394	133054399	cluster:90189	50	+	chr1	133049758	133084235	ENSMUSG00000026427.9	Eif2d	+	5
chr1	133054858	133054861	cluster:90194	107	+	chr1	133049758	133084235	ENSMUSG00000026427.9	Eif2d	+	3
chr1	133064778	133064784	cluster:90282	44	+	chr1	133049758	133084235	ENSMUSG00000026427.9	Eif2d	+	6
chr1	133071631	133071646	cluster:90366	93	+	chr1	133049758	133084235	ENSMUSG00000026427.9	Eif2d	+	15
chr1	133073471	133073478	cluster:90384	86	+	chr1	133049758	133084235	ENSMUSG00000026427.9	Eif2d	+	7
chr1	133296435	133296443	cluster:90806	83	-	chr1	133181828	133423938	ENSMUSG00000026425.8	Srgap2	-	8
chr1	133807109	133807123	cluster:91578	207	+	chr1	133807035	133832898	ENSMUSG00000026434.6	Nucks1	+	14
chr1	133807250	133807257	cluster:91580	202	+	chr1	133807035	133832898	ENSMUSG00000026434.6	Nucks1	+	7
chr1	133807303	133807313	cluster:91583	57	+	chr1	133807035	133832898	ENSMUSG00000026434.6	Nucks1	+	10
chr1	133813131	133813140	cluster:91654	71	+	chr1	133807035	133832898	ENSMUSG00000026434.6	Nucks1	+	9
chr1	133815580	133815584	cluster:91684	120	+	chr1	133807035	133832898	ENSMUSG00000026434.6	Nucks1	+	4
chr1	133815598	133815625	cluster:91685	133	+	chr1	133807035	133832898	ENSMUSG00000026434.6	Nucks1	+	27
chr1	133816345	133816349	cluster:91692	86	+	chr1	133807035	133832898	ENSMUSG00000026434.6	Nucks1	+	4
chr1	133818527	133818538	cluster:91713	163	+	chr1	133807035	133832898	ENSMUSG00000026434.6	Nucks1	+	11
chr1	133824655	133824677	cluster:91753	126	+	chr1	133807035	133832898	ENSMUSG00000026434.6	Nucks1	+	22
chr1	133824702	133824727	cluster:91754	83	+	chr1	133807035	133832898	ENSMUSG00000026434.6	Nucks1	+	25
chr1	133824738	133824747	cluster:91755	64	+	chr1	133807035	133832898	ENSMUSG00000026434.6	Nucks1	+	9
chr1	133827639	133827647	cluster:91783	40	+	chr1	133807035	133832898	ENSMUSG00000026434.6	Nucks1	+	8
chr1	133827728	133827746	cluster:91786	80	+	chr1	133807035	133832898	ENSMUSG00000026434.6	Nucks1	+	18
chr1	133827790	133827814	cluster:91789	148	+	chr1	133807035	133832898	ENSMUSG00000026434.6	Nucks1	+	24
chr1	133827880	133827929	cluster:91791	85	+	chr1	133807035	133832898	ENSMUSG00000026434.6	Nucks1	+	49
chr1	133828169	133828225	cluster:91797	488	+	chr1	133807035	133832898	ENSMUSG00000026434.6	Nucks1	+	56
chr1	133828320	133828361	cluster:91800	351	+	chr1	133807035	133832898	ENSMUSG00000026434.6	Nucks1	+	41
chr1	133828409	133828536	cluster:91803	502	+	chr1	133807035	133832898	ENSMUSG00000026434.6	Nucks1	+	127
chr1	133828549	133828585	cluster:91804	344	+	chr1	133807035	133832898	ENSMUSG00000026434.6	Nucks1	+	36
chr1	133828601	133828618	cluster:91805	85	+	chr1	133807035	133832898	ENSMUSG00000026434.6	Nucks1	+	17
chr1	133828630	133828712	cluster:91806	1046	+	chr1	133807035	133832898	ENSMUSG00000026434.6	Nucks1	+	82
chr1	133828762	133828788	cluster:91808	297	+	chr1	133807035	133832898	ENSMUSG00000026434.6	Nucks1	+	26
chr1	133828845	133828866	cluster:91810	154	+	chr1	133807035	133832898	ENSMUSG00000026434.6	Nucks1	+	21
chr1	133828959	133828972	cluster:91813	111	+	chr1	133807035	133832898	ENSMUSG00000026434.6	Nucks1	+	13
chr1	133828986	133829024	cluster:91814	325	+	chr1	133807035	133832898	ENSMUSG00000026434.6	Nucks1	+	38
chr1	133829050	133829076	cluster:91815	229	+	chr1	133807035	133832898	ENSMUSG00000026434.6	Nucks1	+	26
chr1	133829091	133829146	cluster:91816	733	+	chr1	133807035	133832898	ENSMUSG00000026434.6	Nucks1	+	55
chr1	133829233	133829264	cluster:91818	219	+	chr1	133807035	133832898	ENSMUSG00000026434.6	Nucks1	+	31
chr1	133829281	133829295	cluster:91819	73	+	chr1	133807035	133832898	ENSMUSG00000026434.6	Nucks1	+	14
chr1	133829363	133829381	cluster:91822	46	+	chr1	133807035	133832898	ENSMUSG00000026434.6	Nucks1	+	18
chr1	133829618	133829640	cluster:91830	66	+	chr1	133807035	133832898	ENSMUSG00000026434.6	Nucks1	+	22
chr1	133829686	133829723	cluster:91832	230	+	chr1	133807035	133832898	ENSMUSG00000026434.6	Nucks1	+	37
chr1	133829791	133829807	cluster:91835	66	+	chr1	133807035	133832898	ENSMUSG00000026434.6	Nucks1	+	16
chr1	133829820	133829837	cluster:91836	117	+	chr1	133807035	133832898	ENSMUSG00000026434.6	Nucks1	+	17
chr1	133829852	133829920	cluster:91837	297	+	chr1	133807035	133832898	ENSMUSG00000026434.6	Nucks1	+	68
chr1	133829934	133829955	cluster:91838	105	+	chr1	133807035	133832898	ENSMUSG00000026434.6	Nucks1	+	21
chr1	133829969	133829986	cluster:91839	157	+	chr1	133807035	133832898	ENSMUSG00000026434.6	Nucks1	+	17
chr1	133830113	133830157	cluster:91844	136	+	chr1	133807035	133832898	ENSMUSG00000026434.6	Nucks1	+	44
chr1	133830174	133830188	cluster:91845	70	+	chr1	133807035	133832898	ENSMUSG00000026434.6	Nucks1	+	14
chr1	133830201	133830210	cluster:91846	66	+	chr1	133807035	133832898	ENSMUSG00000026434.6	Nucks1	+	9
chr1	133830267	133830290	cluster:91848	147	+	chr1	133807035	133832898	ENSMUSG00000026434.6	Nucks1	+	23
chr1	133830301	133830325	cluster:91849	144	+	chr1	133807035	133832898	ENSMUSG00000026434.6	Nucks1	+	24
chr1	133830371	133830393	cluster:91851	162	+	chr1	133807035	133832898	ENSMUSG00000026434.6	Nucks1	+	22
chr1	133830562	133830576	cluster:91860	134	+	chr1	133807035	133832898	ENSMUSG00000026434.6	Nucks1	+	14
chr1	133830589	133830598	cluster:91861	87	+	chr1	133807035	133832898	ENSMUSG00000026434.6	Nucks1	+	9
chr1	133830629	133830651	cluster:91862	131	+	chr1	133807035	133832898	ENSMUSG00000026434.6	Nucks1	+	22
chr1	133830705	133830742	cluster:91864	758	+	chr1	133807035	133832898	ENSMUSG00000026434.6	Nucks1	+	37
chr1	133830760	133830777	cluster:91865	284	+	chr1	133807035	133832898	ENSMUSG00000026434.6	Nucks1	+	17
chr1	133830799	133830901	cluster:91866	747	+	chr1	133807035	133832898	ENSMUSG00000026434.6	Nucks1	+	102
chr1	133830973	133830983	cluster:91869	101	+	chr1	133807035	133832898	ENSMUSG00000026434.6	Nucks1	+	10
chr1	133831062	133831098	cluster:91872	549	+	chr1	133807035	133832898	ENSMUSG00000026434.6	Nucks1	+	36
chr1	133831114	133831133	cluster:91873	231	+	chr1	133807035	133832898	ENSMUSG00000026434.6	Nucks1	+	19
chr1	133831189	133831214	cluster:91875	85	+	chr1	133807035	133832898	ENSMUSG00000026434.6	Nucks1	+	25
chr1	133831290	133831300	cluster:91879	116	+	chr1	133807035	133832898	ENSMUSG00000026434.6	Nucks1	+	10
chr1	133831315	133831341	cluster:91880	346	+	chr1	133807035	133832898	ENSMUSG00000026434.6	Nucks1	+	26
chr1	133831354	133831373	cluster:91881	46	+	chr1	133807035	133832898	ENSMUSG00000026434.6	Nucks1	+	19
chr1	133831385	133831393	cluster:91882	122	+	chr1	133807035	133832898	ENSMUSG00000026434.6	Nucks1	+	8
chr1	133831499	133831557	cluster:91885	540	+	chr1	133807035	133832898	ENSMUSG00000026434.6	Nucks1	+	58
chr1	133831599	133831643	cluster:91887	253	+	chr1	133807035	133832898	ENSMUSG00000026434.6	Nucks1	+	44
chr1	133831749	133831758	cluster:91890	123	+	chr1	133807035	133832898	ENSMUSG00000026434.6	Nucks1	+	9
chr1	133831797	133831989	cluster:91892	1655	+	chr1	133807035	133832898	ENSMUSG00000026434.6	Nucks1	+	192
chr1	133832002	133832093	cluster:91893	648	+	chr1	133807035	133832898	ENSMUSG00000026434.6	Nucks1	+	91
chr1	133832191	133832228	cluster:91898	200	+	chr1	133807035	133832898	ENSMUSG00000026434.6	Nucks1	+	37
chr1	133832244	133832269	cluster:91899	141	+	chr1	133807035	133832898	ENSMUSG00000026434.6	Nucks1	+	25
chr1	133832319	133832337	cluster:91901	166	+	chr1	133807035	133832898	ENSMUSG00000026434.6	Nucks1	+	18
chr1	133832392	133832396	cluster:91904	81	+	chr1	133807035	133832898	ENSMUSG00000026434.6	Nucks1	+	4
chr1	133832439	133832469	cluster:91905	250	+	chr1	133807035	133832898	ENSMUSG00000026434.6	Nucks1	+	30
chr1	133832492	133832497	cluster:91906	37	+	chr1	133807035	133832898	ENSMUSG00000026434.6	Nucks1	+	5
chr1	133832567	133832583	cluster:91910	119	+	chr1	133807035	133832898	ENSMUSG00000026434.6	Nucks1	+	16
chr1	133832644	133832716	cluster:91913	350	+	chr1	133807035	133832898	ENSMUSG00000026434.6	Nucks1	+	72
chr1	133832743	133832784	cluster:91914	313	+	chr1	133807035	133832898	ENSMUSG00000026434.6	Nucks1	+	41
chr1	134387847	134387860	cluster:92878	31	+	chr1	134373944	134402242	ENSMUSG00000026439.8	Rbbp5	+	13
chr1	134399108	134399110	cluster:92969	57	+	chr1	134373944	134402242	ENSMUSG00000026439.8	Rbbp5	+	2
chr1	134401362	134401373	cluster:92997	59	+	chr1	134373944	134402242	ENSMUSG00000026439.8	Rbbp5	+	11
chr1	134402084	134402113	cluster:93010	103	+	chr1	134373944	134402242	ENSMUSG00000026439.8	Rbbp5	+	29
chr1	134514391	134514416	cluster:93157	118	-	chr1	134461268	134638374	ENSMUSG00000026442.8	Nfasc	-	25
chr1	134887973	134887990	cluster:93629	119	-	chr1	134886422	134921943	ENSMUSG00000054387.6	Mdm4	-	17
chr1	134888323	134888339	cluster:93636	163	-	chr1	134886422	134921943	ENSMUSG00000054387.6	Mdm4	-	16
chr1	134888457	134888466	cluster:93638	75	-	chr1	134886422	134921943	ENSMUSG00000054387.6	Mdm4	-	9
chr1	134888688	134888705	cluster:93645	76	-	chr1	134886422	134921943	ENSMUSG00000054387.6	Mdm4	-	17
chr1	134893205	134893215	cluster:93701	153	-	chr1	134886422	134921943	ENSMUSG00000054387.6	Mdm4	-	10
chr1	134893561	134893570	cluster:93707	102	-	chr1	134886422	134921943	ENSMUSG00000054387.6	Mdm4	-	9
chr1	134895352	134895360	cluster:93724	47	-	chr1	134886422	134921943	ENSMUSG00000054387.6	Mdm4	-	8
chr1	134897779	134897796	cluster:93759	177	-	chr1	134886422	134921943	ENSMUSG00000054387.6	Mdm4	-	17
chr1	134900465	134900489	cluster:93804	141	-	chr1	134886422	134921943	ENSMUSG00000054387.6	Mdm4	-	24
chr1	134900525	134900539	cluster:93806	40	-	chr1	134886422	134921943	ENSMUSG00000054387.6	Mdm4	-	14
chr1	134900599	134900602	cluster:93808	58	-	chr1	134886422	134921943	ENSMUSG00000054387.6	Mdm4	-	3
chr1	134900621	134900630	cluster:93809	49	-	chr1	134886422	134921943	ENSMUSG00000054387.6	Mdm4	-	9
chr1	134900651	134900680	cluster:93810	105	-	chr1	134886422	134921943	ENSMUSG00000054387.6	Mdm4	-	29
chr1	134900821	134900853	cluster:93814	172	-	chr1	134886422	134921943	ENSMUSG00000054387.6	Mdm4	-	32
chr1	134900884	134900908	cluster:93815	152	-	chr1	134886422	134921943	ENSMUSG00000054387.6	Mdm4	-	24
chr1	134901123	134901127	cluster:93823	246	-	chr1	134886422	134921943	ENSMUSG00000054387.6	Mdm4	-	4
chr1	134901203	134901226	cluster:93825	310	-	chr1	134886422	134921943	ENSMUSG00000054387.6	Mdm4	-	23
chr1	134901255	134901290	cluster:93826	163	-	chr1	134886422	134921943	ENSMUSG00000054387.6	Mdm4	-	35
chr1	134901334	134901343	cluster:93827	85	-	chr1	134886422	134921943	ENSMUSG00000054387.6	Mdm4	-	9
chr1	134901372	134901401	cluster:93828	137	-	chr1	134886422	134921943	ENSMUSG00000054387.6	Mdm4	-	29
chr1	134901437	134901490	cluster:93830	348	-	chr1	134886422	134921943	ENSMUSG00000054387.6	Mdm4	-	53
chr1	134901504	134901516	cluster:93831	115	-	chr1	134886422	134921943	ENSMUSG00000054387.6	Mdm4	-	12
chr1	134901576	134901583	cluster:93833	103	-	chr1	134886422	134921943	ENSMUSG00000054387.6	Mdm4	-	7
chr1	134901601	134901622	cluster:93834	63	-	chr1	134886422	134921943	ENSMUSG00000054387.6	Mdm4	-	21
chr1	134901635	134901678	cluster:93835	153	-	chr1	134886422	134921943	ENSMUSG00000054387.6	Mdm4	-	43
chr1	134901797	134901801	cluster:93840	240	-	chr1	134886422	134921943	ENSMUSG00000054387.6	Mdm4	-	4
chr1	134901847	134901888	cluster:93843	216	-	chr1	134886422	134921943	ENSMUSG00000054387.6	Mdm4	-	41
chr1	134901899	134901917	cluster:93844	290	-	chr1	134886422	134921943	ENSMUSG00000054387.6	Mdm4	-	18
chr1	134902090	134902097	cluster:93848	101	-	chr1	134886422	134921943	ENSMUSG00000054387.6	Mdm4	-	7
chr1	134902131	134902142	cluster:93850	123	-	chr1	134886422	134921943	ENSMUSG00000054387.6	Mdm4	-	11
chr1	134902158	134902174	cluster:93851	139	-	chr1	134886422	134921943	ENSMUSG00000054387.6	Mdm4	-	16
chr1	134902188	134902220	cluster:93852	220	-	chr1	134886422	134921943	ENSMUSG00000054387.6	Mdm4	-	32
chr1	134902356	134902378	cluster:93855	49	-	chr1	134886422	134921943	ENSMUSG00000054387.6	Mdm4	-	22
chr1	134902477	134902532	cluster:93861	157	-	chr1	134886422	134921943	ENSMUSG00000054387.6	Mdm4	-	55
chr1	134902599	134902618	cluster:93863	55	-	chr1	134886422	134921943	ENSMUSG00000054387.6	Mdm4	-	19
chr1	134902629	134902669	cluster:93864	203	-	chr1	134886422	134921943	ENSMUSG00000054387.6	Mdm4	-	40
chr1	134902680	134902701	cluster:93865	122	-	chr1	134886422	134921943	ENSMUSG00000054387.6	Mdm4	-	21
chr1	134902907	134902914	cluster:93872	73	-	chr1	134886422	134921943	ENSMUSG00000054387.6	Mdm4	-	7
chr1	134902925	134902939	cluster:93873	81	-	chr1	134886422	134921943	ENSMUSG00000054387.6	Mdm4	-	14
chr1	134902992	134903048	cluster:93875	355	-	chr1	134886422	134921943	ENSMUSG00000054387.6	Mdm4	-	56
chr1	134903232	134903257	cluster:93881	217	-	chr1	134886422	134921943	ENSMUSG00000054387.6	Mdm4	-	25
chr1	134903270	134903274	cluster:93882	94	-	chr1	134886422	134921943	ENSMUSG00000054387.6	Mdm4	-	4
chr1	134903310	134903331	cluster:93884	150	-	chr1	134886422	134921943	ENSMUSG00000054387.6	Mdm4	-	21
chr1	134903416	134903429	cluster:93887	114	-	chr1	134886422	134921943	ENSMUSG00000054387.6	Mdm4	-	13
chr1	134903443	134903447	cluster:93888	123	-	chr1	134886422	134921943	ENSMUSG00000054387.6	Mdm4	-	4
chr1	134903467	134903506	cluster:93889	239	-	chr1	134886422	134921943	ENSMUSG00000054387.6	Mdm4	-	39
chr1	134903553	134903564	cluster:93892	188	-	chr1	134886422	134921943	ENSMUSG00000054387.6	Mdm4	-	11
chr1	134903582	134903624	cluster:93893	165	-	chr1	134886422	134921943	ENSMUSG00000054387.6	Mdm4	-	42
chr1	134903662	134903698	cluster:93894	271	-	chr1	134886422	134921943	ENSMUSG00000054387.6	Mdm4	-	36
chr1	134903731	134903776	cluster:93896	240	-	chr1	134886422	134921943	ENSMUSG00000054387.6	Mdm4	-	45
chr1	134903953	134903983	cluster:93902	280	-	chr1	134886422	134921943	ENSMUSG00000054387.6	Mdm4	-	30
chr1	134904020	134904041	cluster:93904	219	-	chr1	134886422	134921943	ENSMUSG00000054387.6	Mdm4	-	21
chr1	134904263	134904268	cluster:93912	71	-	chr1	134886422	134921943	ENSMUSG00000054387.6	Mdm4	-	5
chr1	134904287	134904316	cluster:93913	461	-	chr1	134886422	134921943	ENSMUSG00000054387.6	Mdm4	-	29
chr1	134904392	134904405	cluster:93915	179	-	chr1	134886422	134921943	ENSMUSG00000054387.6	Mdm4	-	13
chr1	134904639	134904656	cluster:93918	128	-	chr1	134886422	134921943	ENSMUSG00000054387.6	Mdm4	-	17
chr1	134904711	134904741	cluster:93920	170	-	chr1	134886422	134921943	ENSMUSG00000054387.6	Mdm4	-	30
chr1	134905113	134905125	cluster:93928	81	-	chr1	134886422	134921943	ENSMUSG00000054387.6	Mdm4	-	12
chr1	134905146	134905203	cluster:93929	288	-	chr1	134886422	134921943	ENSMUSG00000054387.6	Mdm4	-	57
chr1	134905603	134905614	cluster:93941	68	-	chr1	134886422	134921943	ENSMUSG00000054387.6	Mdm4	-	11
chr1	134905648	134905679	cluster:93943	241	-	chr1	134886422	134921943	ENSMUSG00000054387.6	Mdm4	-	31
chr1	134906238	134906260	cluster:93954	62	-	chr1	134886422	134921943	ENSMUSG00000054387.6	Mdm4	-	22
chr1	134906391	134906394	cluster:93957	52	-	chr1	134886422	134921943	ENSMUSG00000054387.6	Mdm4	-	3
chr1	134906985	134907006	cluster:93959	182	-	chr1	134886422	134921943	ENSMUSG00000054387.6	Mdm4	-	21
chr1	134907298	134907301	cluster:93962	85	-	chr1	134886422	134921943	ENSMUSG00000054387.6	Mdm4	-	3
chr1	134907314	134907330	cluster:93963	85	-	chr1	134886422	134921943	ENSMUSG00000054387.6	Mdm4	-	16
chr1	134907401	134907405	cluster:93965	42	-	chr1	134886422	134921943	ENSMUSG00000054387.6	Mdm4	-	4
chr1	134908368	134908376	cluster:93987	68	-	chr1	134886422	134921943	ENSMUSG00000054387.6	Mdm4	-	8
chr1	134908670	134908683	cluster:93996	114	-	chr1	134886422	134921943	ENSMUSG00000054387.6	Mdm4	-	13
chr1	134909049	134909073	cluster:94002	109	-	chr1	134886422	134921943	ENSMUSG00000054387.6	Mdm4	-	24
chr1	134910945	134910963	cluster:94026	113	-	chr1	134886422	134921943	ENSMUSG00000054387.6	Mdm4	-	18
chr1	134914003	134914029	cluster:94067	58	-	chr1	134886422	134921943	ENSMUSG00000054387.6	Mdm4	-	26
chr1	134914356	134914369	cluster:94072	64	-	chr1	134886422	134921943	ENSMUSG00000054387.6	Mdm4	-	13
chr1	134914408	134914430	cluster:94073	69	-	chr1	134886422	134921943	ENSMUSG00000054387.6	Mdm4	-	22
chr1	134915041	134915066	cluster:94082	166	-	chr1	134886422	134921943	ENSMUSG00000054387.6	Mdm4	-	25
chr1	134915120	134915127	cluster:94084	54	-	chr1	134886422	134921943	ENSMUSG00000054387.6	Mdm4	-	7
chr1	135028036	135028045	cluster:94314	65	+	chr1	135027720	135036377	ENSMUSG00000046062.4	Ppp1r15b	+	9
chr1	135028552	135028559	cluster:94327	83	+	chr1	135027720	135036377	ENSMUSG00000046062.4	Ppp1r15b	+	7
chr1	135029259	135029269	cluster:94346	84	+	chr1	135027720	135036377	ENSMUSG00000046062.4	Ppp1r15b	+	10
chr1	135029558	135029579	cluster:94355	79	+	chr1	135027720	135036377	ENSMUSG00000046062.4	Ppp1r15b	+	21
chr1	135029874	135029890	cluster:94364	126	+	chr1	135027720	135036377	ENSMUSG00000046062.4	Ppp1r15b	+	16
chr1	135029925	135029956	cluster:94366	160	+	chr1	135027720	135036377	ENSMUSG00000046062.4	Ppp1r15b	+	31
chr1	135033270	135033283	cluster:94396	149	+	chr1	135027720	135036377	ENSMUSG00000046062.4	Ppp1r15b	+	13
chr1	135033343	135033359	cluster:94398	75	+	chr1	135027720	135036377	ENSMUSG00000046062.4	Ppp1r15b	+	16
chr1	135034202	135034215	cluster:94416	44	+	chr1	135027720	135036377	ENSMUSG00000046062.4	Ppp1r15b	+	13
chr1	135034237	135034262	cluster:94417	208	+	chr1	135027720	135036377	ENSMUSG00000046062.4	Ppp1r15b	+	25
chr1	135034432	135034443	cluster:94422	146	+	chr1	135027720	135036377	ENSMUSG00000046062.4	Ppp1r15b	+	11
chr1	135035089	135035123	cluster:94437	242	+	chr1	135027720	135036377	ENSMUSG00000046062.4	Ppp1r15b	+	34
chr1	135035688	135035696	cluster:94452	42	+	chr1	135027720	135036377	ENSMUSG00000046062.4	Ppp1r15b	+	8
chr1	135035719	135035737	cluster:94453	138	+	chr1	135027720	135036377	ENSMUSG00000046062.4	Ppp1r15b	+	18
chr1	135035928	135035948	cluster:94460	99	+	chr1	135027720	135036377	ENSMUSG00000046062.4	Ppp1r15b	+	20
chr1	135280612	135280630	cluster:94631	84	-	chr1	135278880	135320954	ENSMUSG00000070643.5	Sox13	-	18
chr1	135315831	135315843	cluster:94746	62	-	chr1	135278880	135320954	ENSMUSG00000070643.5	Sox13	-	12
chr1	135517479	135517491	cluster:94929	127	-	chr1	135516448	135557957	ENSMUSG00000026464.6	Zc3h11a	-	12
chr1	135544166	135544177	cluster:95128	94	-	chr1	135516448	135557957	ENSMUSG00000026464.6	Zc3h11a	-	11
chr1	135549639	135549652	cluster:95173	71	-	chr1	135516448	135557957	ENSMUSG00000026464.6	Zc3h11a	-	13
chr1	135550679	135550691	cluster:95192	198	-	chr1	135516448	135557957	ENSMUSG00000026464.6	Zc3h11a	-	12
chr1	135550810	135550893	cluster:95196	1304	-	chr1	135516448	135557957	ENSMUSG00000026464.6	Zc3h11a	-	83
chr1	135551055	135551106	cluster:95203	176	-	chr1	135516448	135557957	ENSMUSG00000026464.6	Zc3h11a	-	51
chr1	135551181	135551194	cluster:95207	55	-	chr1	135516448	135557957	ENSMUSG00000026464.6	Zc3h11a	-	13
chr1	135551255	135551272	cluster:95209	83	-	chr1	135516448	135557957	ENSMUSG00000026464.6	Zc3h11a	-	17
chr1	135551386	135551433	cluster:95212	214	-	chr1	135516448	135557957	ENSMUSG00000026464.6	Zc3h11a	-	47
chr1	135551619	135551639	cluster:95218	160	-	chr1	135516448	135557957	ENSMUSG00000026464.6	Zc3h11a	-	20
chr1	135551665	135551715	cluster:95220	419	-	chr1	135516448	135557957	ENSMUSG00000026464.6	Zc3h11a	-	50
chr1	135551819	135551830	cluster:95223	60	-	chr1	135516448	135557957	ENSMUSG00000026464.6	Zc3h11a	-	11
chr1	135551850	135551863	cluster:95224	45	-	chr1	135516448	135557957	ENSMUSG00000026464.6	Zc3h11a	-	13
chr1	135551949	135551991	cluster:95226	326	-	chr1	135516448	135557957	ENSMUSG00000026464.6	Zc3h11a	-	42
chr1	135552009	135552017	cluster:95227	189	-	chr1	135516448	135557957	ENSMUSG00000026464.6	Zc3h11a	-	8
chr1	135552070	135552088	cluster:95230	90	-	chr1	135516448	135557957	ENSMUSG00000026464.6	Zc3h11a	-	18
chr1	135552248	135552294	cluster:95235	415	-	chr1	135516448	135557957	ENSMUSG00000026464.6	Zc3h11a	-	46
chr1	135552372	135552385	cluster:95238	109	-	chr1	135516448	135557957	ENSMUSG00000026464.6	Zc3h11a	-	13
chr1	135552400	135552423	cluster:95239	96	-	chr1	135516448	135557957	ENSMUSG00000026464.6	Zc3h11a	-	23
chr1	135552446	135552494	cluster:95240	356	-	chr1	135516448	135557957	ENSMUSG00000026464.6	Zc3h11a	-	48
chr1	135552527	135552580	cluster:95242	276	-	chr1	135516448	135557957	ENSMUSG00000026464.6	Zc3h11a	-	53
chr1	135552614	135552630	cluster:95243	238	-	chr1	135516448	135557957	ENSMUSG00000026464.6	Zc3h11a	-	16
chr1	135552641	135552659	cluster:95244	146	-	chr1	135516448	135557957	ENSMUSG00000026464.6	Zc3h11a	-	18
chr1	135552692	135552705	cluster:95245	132	-	chr1	135516448	135557957	ENSMUSG00000026464.6	Zc3h11a	-	13
chr1	135552719	135552738	cluster:95246	161	-	chr1	135516448	135557957	ENSMUSG00000026464.6	Zc3h11a	-	19
chr1	135552800	135552816	cluster:95249	79	-	chr1	135516448	135557957	ENSMUSG00000026464.6	Zc3h11a	-	16
chr1	135552955	135552987	cluster:95256	120	-	chr1	135516448	135557957	ENSMUSG00000026464.6	Zc3h11a	-	32
chr1	135553010	135553019	cluster:95257	47	-	chr1	135516448	135557957	ENSMUSG00000026464.6	Zc3h11a	-	9
chr1	135553136	135553161	cluster:95260	132	-	chr1	135516448	135557957	ENSMUSG00000026464.6	Zc3h11a	-	25
chr1	135553180	135553189	cluster:95261	46	-	chr1	135516448	135557957	ENSMUSG00000026464.6	Zc3h11a	-	9
chr1	135553233	135553241	cluster:95263	78	-	chr1	135516448	135557957	ENSMUSG00000026464.6	Zc3h11a	-	8
chr1	135553425	135553456	cluster:95270	225	-	chr1	135516448	135557957	ENSMUSG00000026464.6	Zc3h11a	-	31
chr1	135553509	135553517	cluster:95272	33	-	chr1	135516448	135557957	ENSMUSG00000026464.6	Zc3h11a	-	8
chr1	135553536	135553573	cluster:95273	244	-	chr1	135516448	135557957	ENSMUSG00000026464.6	Zc3h11a	-	37
chr1	135553671	135553730	cluster:95278	164	-	chr1	135516448	135557957	ENSMUSG00000026464.6	Zc3h11a	-	59
chr1	135553747	135553765	cluster:95279	84	-	chr1	135516448	135557957	ENSMUSG00000026464.6	Zc3h11a	-	18
chr1	135553820	135553861	cluster:95281	361	-	chr1	135516448	135557957	ENSMUSG00000026464.6	Zc3h11a	-	41
chr1	135553877	135553886	cluster:95282	94	-	chr1	135516448	135557957	ENSMUSG00000026464.6	Zc3h11a	-	9
chr1	135553921	135553935	cluster:95284	32	-	chr1	135516448	135557957	ENSMUSG00000026464.6	Zc3h11a	-	14
chr1	135553949	135553975	cluster:95285	108	-	chr1	135516448	135557957	ENSMUSG00000026464.6	Zc3h11a	-	26
chr1	135554004	135554038	cluster:95286	229	-	chr1	135516448	135557957	ENSMUSG00000026464.6	Zc3h11a	-	34
chr1	135554131	135554142	cluster:95289	111	-	chr1	135516448	135557957	ENSMUSG00000026464.6	Zc3h11a	-	11
chr1	135554237	135554291	cluster:95293	269	-	chr1	135516448	135557957	ENSMUSG00000026464.6	Zc3h11a	-	54
chr1	135554344	135554409	cluster:95295	547	-	chr1	135516448	135557957	ENSMUSG00000026464.6	Zc3h11a	-	65
chr1	135554445	135554449	cluster:95296	53	-	chr1	135516448	135557957	ENSMUSG00000026464.6	Zc3h11a	-	4
chr1	135554486	135554503	cluster:95298	93	-	chr1	135516448	135557957	ENSMUSG00000026464.6	Zc3h11a	-	17
chr1	135554568	135554579	cluster:95301	99	-	chr1	135516448	135557957	ENSMUSG00000026464.6	Zc3h11a	-	11
chr1	135554609	135554612	cluster:95302	83	-	chr1	135516448	135557957	ENSMUSG00000026464.6	Zc3h11a	-	3
chr1	135554676	135554686	cluster:95305	31	-	chr1	135516448	135557957	ENSMUSG00000026464.6	Zc3h11a	-	10
chr1	135554824	135554838	cluster:95310	30	-	chr1	135516448	135557957	ENSMUSG00000026464.6	Zc3h11a	-	14
chr1	135554963	135554975	cluster:95314	132	-	chr1	135516448	135557957	ENSMUSG00000026464.6	Zc3h11a	-	12
chr1	135555259	135555272	cluster:95323	92	-	chr1	135516448	135557957	ENSMUSG00000026464.6	Zc3h11a	-	13
chr1	135555349	135555365	cluster:95326	357	-	chr1	135516448	135557957	ENSMUSG00000026464.6	Zc3h11a	-	16
chr1	135555519	135555525	cluster:95331	110	-	chr1	135516448	135557957	ENSMUSG00000026464.6	Zc3h11a	-	6
chr1	135555792	135555809	cluster:95342	130	-	chr1	135516448	135557957	ENSMUSG00000026464.6	Zc3h11a	-	17
chr1	135555833	135555840	cluster:95343	88	-	chr1	135516448	135557957	ENSMUSG00000026464.6	Zc3h11a	-	7
chr1	135555902	135555924	cluster:95346	247	-	chr1	135516448	135557957	ENSMUSG00000026464.6	Zc3h11a	-	22
chr1	135555965	135555975	cluster:95347	86	-	chr1	135516448	135557957	ENSMUSG00000026464.6	Zc3h11a	-	10
chr1	135556053	135556074	cluster:95349	210	-	chr1	135516448	135557957	ENSMUSG00000026464.6	Zc3h11a	-	21
chr1	135556108	135556114	cluster:95351	110	-	chr1	135516448	135557957	ENSMUSG00000026464.6	Zc3h11a	-	6
chr1	135556257	135556261	cluster:95358	102	-	chr1	135516448	135557957	ENSMUSG00000026464.6	Zc3h11a	-	4
chr1	135556318	135556341	cluster:95361	147	-	chr1	135516448	135557957	ENSMUSG00000026464.6	Zc3h11a	-	23
chr1	135556391	135556402	cluster:95363	98	-	chr1	135516448	135557957	ENSMUSG00000026464.6	Zc3h11a	-	11
chr1	135556574	135556609	cluster:95369	287	-	chr1	135516448	135557957	ENSMUSG00000026464.6	Zc3h11a	-	35
chr1	135556624	135556665	cluster:95370	227	-	chr1	135516448	135557957	ENSMUSG00000026464.6	Zc3h11a	-	41
chr1	135556758	135556766	cluster:95374	99	-	chr1	135516448	135557957	ENSMUSG00000026464.6	Zc3h11a	-	8
chr1	135556784	135556850	cluster:95375	420	-	chr1	135516448	135557957	ENSMUSG00000026464.6	Zc3h11a	-	66
chr1	135556892	135556901	cluster:95377	48	-	chr1	135516448	135557957	ENSMUSG00000026464.6	Zc3h11a	-	9
chr1	135556912	135556923	cluster:95378	60	-	chr1	135516448	135557957	ENSMUSG00000026464.6	Zc3h11a	-	11
chr1	135556973	135556989	cluster:95380	128	-	chr1	135516448	135557957	ENSMUSG00000026464.6	Zc3h11a	-	16
chr1	135557027	135557051	cluster:95382	301	-	chr1	135516448	135557957	ENSMUSG00000026464.6	Zc3h11a	-	24
chr1	135557154	135557190	cluster:95387	265	-	chr1	135516448	135557957	ENSMUSG00000026464.6	Zc3h11a	-	36
chr1	135557261	135557283	cluster:95389	106	-	chr1	135516448	135557957	ENSMUSG00000026464.6	Zc3h11a	-	22
chr1	135557299	135557319	cluster:95390	159	-	chr1	135516448	135557957	ENSMUSG00000026464.6	Zc3h11a	-	20
chr1	135557347	135557373	cluster:95391	122	-	chr1	135516448	135557957	ENSMUSG00000026464.6	Zc3h11a	-	26
chr1	135557384	135557399	cluster:95392	153	-	chr1	135516448	135557957	ENSMUSG00000026464.6	Zc3h11a	-	15
chr1	135557412	135557424	cluster:95393	206	-	chr1	135516448	135557957	ENSMUSG00000026464.6	Zc3h11a	-	12
chr1	135557779	135557818	cluster:95405	320	-	chr1	135516448	135557957	ENSMUSG00000026464.6	Zc3h11a	-	39
chr1	135557863	135557886	cluster:95407	160	-	chr1	135516448	135557957	ENSMUSG00000026464.6	Zc3h11a	-	23
chr1	135557922	135557925	cluster:95409	79	-	chr1	135516448	135557957	ENSMUSG00000026464.6	Zc3h11a	-	3
chr1	135972681	135972692	cluster:95655	118	-	chr1	135971747	135975697	ENSMUSG00000020423.6	Btg2	-	11
chr1	135973735	135973755	cluster:95664	135	-	chr1	135971747	135975697	ENSMUSG00000020423.6	Btg2	-	20
chr1	136201993	136202004	cluster:95780	216	-	chr1	136193360	136229505	ENSMUSG00000026458.6	Ppfia4	-	11
chr1	136244150	136244162	cluster:95914	84	-	chr1	136242674	136258576	ENSMUSG00000042305.6	Tmem183a	-	12
chr1	136244468	136244478	cluster:95922	106	-	chr1	136242674	136258576	ENSMUSG00000042305.6	Tmem183a	-	10
chr1	136244758	136244766	cluster:95930	82	-	chr1	136242674	136258576	ENSMUSG00000042305.6	Tmem183a	-	8
chr1	136249274	136249289	cluster:95957	52	-	chr1	136242674	136258576	ENSMUSG00000042305.6	Tmem183a	-	15
chr1	136253263	136253273	cluster:95995	117	-	chr1	136242674	136258576	ENSMUSG00000042305.6	Tmem183a	-	10
chr1	136302578	136302590	cluster:96062	32	+	chr1	136302358	136308317	ENSMUSG00000026456.11	Cyb5r1	+	12
chr1	136302606	136302615	cluster:96063	31	+	chr1	136302358	136308317	ENSMUSG00000026456.11	Cyb5r1	+	9
chr1	136302731	136302741	cluster:96066	98	+	chr1	136302358	136308317	ENSMUSG00000026456.11	Cyb5r1	+	10
chr1	136302794	136302820	cluster:96069	158	+	chr1	136302358	136308317	ENSMUSG00000026456.11	Cyb5r1	+	26
chr1	136302860	136302885	cluster:96071	137	+	chr1	136302358	136308317	ENSMUSG00000026456.11	Cyb5r1	+	25
chr1	136302896	136302909	cluster:96072	51	+	chr1	136302358	136308317	ENSMUSG00000026456.11	Cyb5r1	+	13
chr1	136302922	136302935	cluster:96073	126	+	chr1	136302358	136308317	ENSMUSG00000026456.11	Cyb5r1	+	13
chr1	136303168	136303186	cluster:96079	93	+	chr1	136302358	136308317	ENSMUSG00000026456.11	Cyb5r1	+	18
chr1	136303225	136303234	cluster:96081	59	+	chr1	136302358	136308317	ENSMUSG00000026456.11	Cyb5r1	+	9
chr1	136304199	136304242	cluster:96100	352	+	chr1	136302358	136308317	ENSMUSG00000026456.11	Cyb5r1	+	43
chr1	136304284	136304304	cluster:96102	54	+	chr1	136302358	136308317	ENSMUSG00000026456.11	Cyb5r1	+	20
chr1	136304464	136304512	cluster:96110	266	+	chr1	136302358	136308317	ENSMUSG00000026456.11	Cyb5r1	+	48
chr1	136304554	136304586	cluster:96111	157	+	chr1	136302358	136308317	ENSMUSG00000026456.11	Cyb5r1	+	32
chr1	136304740	136304776	cluster:96115	185	+	chr1	136302358	136308317	ENSMUSG00000026456.11	Cyb5r1	+	36
chr1	136304790	136304797	cluster:96116	78	+	chr1	136302358	136308317	ENSMUSG00000026456.11	Cyb5r1	+	7
chr1	136304819	136304837	cluster:96117	105	+	chr1	136302358	136308317	ENSMUSG00000026456.11	Cyb5r1	+	18
chr1	136304878	136304885	cluster:96119	105	+	chr1	136302358	136308317	ENSMUSG00000026456.11	Cyb5r1	+	7
chr1	136304986	136305001	cluster:96122	95	+	chr1	136302358	136308317	ENSMUSG00000026456.11	Cyb5r1	+	15
chr1	136305126	136305172	cluster:96127	211	+	chr1	136302358	136308317	ENSMUSG00000026456.11	Cyb5r1	+	46
chr1	136306047	136306063	cluster:96151	283	+	chr1	136302358	136308317	ENSMUSG00000026456.11	Cyb5r1	+	16
chr1	136307068	136307083	cluster:96164	316	+	chr1	136302358	136308317	ENSMUSG00000026456.11	Cyb5r1	+	15
chr1	136307098	136307134	cluster:96165	174	+	chr1	136302358	136308317	ENSMUSG00000026456.11	Cyb5r1	+	36
chr1	136307161	136307168	cluster:96167	73	+	chr1	136302358	136308317	ENSMUSG00000026456.11	Cyb5r1	+	7
chr1	136307314	136307335	cluster:96172	106	+	chr1	136302358	136308317	ENSMUSG00000026456.11	Cyb5r1	+	21
chr1	136307389	136307402	cluster:96174	237	+	chr1	136302358	136308317	ENSMUSG00000026456.11	Cyb5r1	+	13
chr1	136307542	136307571	cluster:96179	169	+	chr1	136302358	136308317	ENSMUSG00000026456.11	Cyb5r1	+	29
chr1	136307602	136307619	cluster:96181	172	+	chr1	136302358	136308317	ENSMUSG00000026456.11	Cyb5r1	+	17
chr1	136307634	136307655	cluster:96182	247	+	chr1	136302358	136308317	ENSMUSG00000026456.11	Cyb5r1	+	21
chr1	136307714	136307735	cluster:96184	104	+	chr1	136302358	136308317	ENSMUSG00000026456.11	Cyb5r1	+	21
chr1	136307757	136307771	cluster:96185	50	+	chr1	136302358	136308317	ENSMUSG00000026456.11	Cyb5r1	+	14
chr1	136307845	136307875	cluster:96188	286	+	chr1	136302358	136308317	ENSMUSG00000026456.11	Cyb5r1	+	30
chr1	136307924	136307944	cluster:96190	193	+	chr1	136302358	136308317	ENSMUSG00000026456.11	Cyb5r1	+	20
chr1	136307959	136307972	cluster:96191	114	+	chr1	136302358	136308317	ENSMUSG00000026456.11	Cyb5r1	+	13
chr1	136319507	136319527	cluster:96268	138	+	chr1	136311955	136329928	ENSMUSG00000026457.8	Adipor1	+	20
chr1	136324681	136324721	cluster:96304	180	+	chr1	136311955	136329928	ENSMUSG00000026457.8	Adipor1	+	40
chr1	136327447	136327475	cluster:96321	62	+	chr1	136311955	136329928	ENSMUSG00000026457.8	Adipor1	+	28
chr1	136328693	136328709	cluster:96346	70	+	chr1	136311955	136329928	ENSMUSG00000026457.8	Adipor1	+	16
chr1	136328826	136328838	cluster:96351	92	+	chr1	136311955	136329928	ENSMUSG00000026457.8	Adipor1	+	12
chr1	136402986	136403007	cluster:96571	27	+	chr1	136391225	136406451	ENSMUSG00000042229.7	Rabif	+	21
chr1	136403746	136403760	cluster:96577	121	+	chr1	136391225	136406451	ENSMUSG00000042229.7	Rabif	+	14
chr1	136403803	136403809	cluster:96578	36	+	chr1	136391225	136406451	ENSMUSG00000042229.7	Rabif	+	6
chr1	136404231	136404248	cluster:96589	109	+	chr1	136391225	136406451	ENSMUSG00000042229.7	Rabif	+	17
chr1	136456831	136456844	cluster:96630	75	+	chr1	136456748	136529454	ENSMUSG00000042207.10	Kdm5b	+	13
chr1	136457032	136457060	cluster:96634	100	+	chr1	136456748	136529454	ENSMUSG00000042207.10	Kdm5b	+	28
chr1	136463002	136463019	cluster:96704	72	+	chr1	136456748	136529454	ENSMUSG00000042207.10	Kdm5b	+	17
chr1	136469310	136469319	cluster:96760	135	+	chr1	136456748	136529454	ENSMUSG00000042207.10	Kdm5b	+	9
chr1	136481618	136481632	cluster:96842	63	+	chr1	136456748	136529454	ENSMUSG00000042207.10	Kdm5b	+	14
chr1	136484218	136484231	cluster:96863	32	+	chr1	136456748	136529454	ENSMUSG00000042207.10	Kdm5b	+	13
chr1	136484258	136484270	cluster:96864	134	+	chr1	136456748	136529454	ENSMUSG00000042207.10	Kdm5b	+	12
chr1	136484512	136484517	cluster:96868	63	+	chr1	136456748	136529454	ENSMUSG00000042207.10	Kdm5b	+	5
chr1	136484562	136484580	cluster:96870	125	+	chr1	136456748	136529454	ENSMUSG00000042207.10	Kdm5b	+	18
chr1	136485492	136485519	cluster:96891	252	+	chr1	136456748	136529454	ENSMUSG00000042207.10	Kdm5b	+	27
chr1	136490455	136490471	cluster:96937	78	+	chr1	136456748	136529454	ENSMUSG00000042207.10	Kdm5b	+	16
chr1	136492035	136492047	cluster:96949	73	+	chr1	136456748	136529454	ENSMUSG00000042207.10	Kdm5b	+	12
chr1	136494168	136494183	cluster:96977	128	+	chr1	136456748	136529454	ENSMUSG00000042207.10	Kdm5b	+	15
chr1	136494201	136494208	cluster:96978	79	+	chr1	136456748	136529454	ENSMUSG00000042207.10	Kdm5b	+	7
chr1	136496047	136496050	cluster:97002	69	+	chr1	136456748	136529454	ENSMUSG00000042207.10	Kdm5b	+	3
chr1	136497908	136497924	cluster:97026	58	+	chr1	136456748	136529454	ENSMUSG00000042207.10	Kdm5b	+	16
chr1	136499101	136499110	cluster:97046	92	+	chr1	136456748	136529454	ENSMUSG00000042207.10	Kdm5b	+	9
chr1	136499132	136499148	cluster:97047	77	+	chr1	136456748	136529454	ENSMUSG00000042207.10	Kdm5b	+	16
chr1	136500507	136500512	cluster:97057	76	+	chr1	136456748	136529454	ENSMUSG00000042207.10	Kdm5b	+	5
chr1	136501518	136501530	cluster:97079	89	+	chr1	136456748	136529454	ENSMUSG00000042207.10	Kdm5b	+	12
chr1	136501997	136502011	cluster:97087	31	+	chr1	136456748	136529454	ENSMUSG00000042207.10	Kdm5b	+	14
chr1	136504255	136504278	cluster:97116	156	+	chr1	136456748	136529454	ENSMUSG00000042207.10	Kdm5b	+	23
chr1	136504297	136504308	cluster:97117	292	+	chr1	136456748	136529454	ENSMUSG00000042207.10	Kdm5b	+	11
chr1	136504335	136504344	cluster:97118	83	+	chr1	136456748	136529454	ENSMUSG00000042207.10	Kdm5b	+	9
chr1	136505466	136505473	cluster:97127	103	+	chr1	136456748	136529454	ENSMUSG00000042207.10	Kdm5b	+	7
chr1	136505538	136505557	cluster:97130	229	+	chr1	136456748	136529454	ENSMUSG00000042207.10	Kdm5b	+	19
chr1	136508062	136508071	cluster:97145	62	+	chr1	136456748	136529454	ENSMUSG00000042207.10	Kdm5b	+	9
chr1	136509702	136509726	cluster:97168	37	+	chr1	136456748	136529454	ENSMUSG00000042207.10	Kdm5b	+	24
chr1	136509761	136509791	cluster:97169	133	+	chr1	136456748	136529454	ENSMUSG00000042207.10	Kdm5b	+	30
chr1	136509828	136509861	cluster:97171	222	+	chr1	136456748	136529454	ENSMUSG00000042207.10	Kdm5b	+	33
chr1	136510508	136510514	cluster:97183	100	+	chr1	136456748	136529454	ENSMUSG00000042207.10	Kdm5b	+	6
chr1	136512550	136512556	cluster:97198	73	+	chr1	136456748	136529454	ENSMUSG00000042207.10	Kdm5b	+	6
chr1	136512808	136512824	cluster:97205	250	+	chr1	136456748	136529454	ENSMUSG00000042207.10	Kdm5b	+	16
chr1	136514361	136514384	cluster:97222	111	+	chr1	136456748	136529454	ENSMUSG00000042207.10	Kdm5b	+	23
chr1	136514439	136514447	cluster:97224	118	+	chr1	136456748	136529454	ENSMUSG00000042207.10	Kdm5b	+	8
chr1	136514459	136514482	cluster:97225	170	+	chr1	136456748	136529454	ENSMUSG00000042207.10	Kdm5b	+	23
chr1	136514500	136514509	cluster:97226	71	+	chr1	136456748	136529454	ENSMUSG00000042207.10	Kdm5b	+	9
chr1	136517478	136517502	cluster:97265	87	+	chr1	136456748	136529454	ENSMUSG00000042207.10	Kdm5b	+	24
chr1	136517570	136517594	cluster:97269	176	+	chr1	136456748	136529454	ENSMUSG00000042207.10	Kdm5b	+	24
chr1	136518567	136518571	cluster:97280	77	+	chr1	136456748	136529454	ENSMUSG00000042207.10	Kdm5b	+	4
chr1	136521443	136521448	cluster:97319	97	+	chr1	136456748	136529454	ENSMUSG00000042207.10	Kdm5b	+	5
chr1	136521499	136521523	cluster:97321	111	+	chr1	136456748	136529454	ENSMUSG00000042207.10	Kdm5b	+	24
chr1	136521674	136521713	cluster:97327	214	+	chr1	136456748	136529454	ENSMUSG00000042207.10	Kdm5b	+	39
chr1	136522173	136522194	cluster:97333	29	+	chr1	136456748	136529454	ENSMUSG00000042207.10	Kdm5b	+	21
chr1	136523854	136523870	cluster:97349	209	+	chr1	136456748	136529454	ENSMUSG00000042207.10	Kdm5b	+	16
chr1	136523902	136523915	cluster:97351	112	+	chr1	136456748	136529454	ENSMUSG00000042207.10	Kdm5b	+	13
chr1	136525309	136525315	cluster:97365	62	+	chr1	136456748	136529454	ENSMUSG00000042207.10	Kdm5b	+	6
chr1	136527111	136527120	cluster:97378	79	+	chr1	136456748	136529454	ENSMUSG00000042207.10	Kdm5b	+	9
chr1	136527144	136527166	cluster:97379	47	+	chr1	136456748	136529454	ENSMUSG00000042207.10	Kdm5b	+	22
chr1	136527903	136527907	cluster:97395	125	+	chr1	136456748	136529454	ENSMUSG00000042207.10	Kdm5b	+	4
chr1	136528051	136528067	cluster:97401	145	+	chr1	136456748	136529454	ENSMUSG00000042207.10	Kdm5b	+	16
chr1	136528081	136528096	cluster:97402	216	+	chr1	136456748	136529454	ENSMUSG00000042207.10	Kdm5b	+	15
chr1	136528109	136528152	cluster:97403	167	+	chr1	136456748	136529454	ENSMUSG00000042207.10	Kdm5b	+	43
chr1	136528179	136528185	cluster:97405	101	+	chr1	136456748	136529454	ENSMUSG00000042207.10	Kdm5b	+	6
chr1	136528259	136528270	cluster:97409	127	+	chr1	136456748	136529454	ENSMUSG00000042207.10	Kdm5b	+	11
chr1	136528308	136528320	cluster:97410	161	+	chr1	136456748	136529454	ENSMUSG00000042207.10	Kdm5b	+	12
chr1	136528347	136528381	cluster:97413	171	+	chr1	136456748	136529454	ENSMUSG00000042207.10	Kdm5b	+	34
chr1	136528392	136528494	cluster:97414	525	+	chr1	136456748	136529454	ENSMUSG00000042207.10	Kdm5b	+	102
chr1	136528600	136528605	cluster:97417	80	+	chr1	136456748	136529454	ENSMUSG00000042207.10	Kdm5b	+	5
chr1	136529128	136529142	cluster:97425	212	+	chr1	136456748	136529454	ENSMUSG00000042207.10	Kdm5b	+	14
chr1	136529401	136529412	cluster:97433	62	+	chr1	136456748	136529454	ENSMUSG00000042207.10	Kdm5b	+	11
chr1	136867833	136867835	cluster:97920	57	+	chr1	136859142	136870739	ENSMUSG00000026429.7	Ube2t	+	2
chr1	137281193	137281202	cluster:98324	98	-	chr1	137278889	137327076	ENSMUSG00000041879.7	Ipo9	-	9
chr1	137281611	137281630	cluster:98332	91	-	chr1	137278889	137327076	ENSMUSG00000041879.7	Ipo9	-	19
chr1	137281752	137281759	cluster:98334	84	-	chr1	137278889	137327076	ENSMUSG00000041879.7	Ipo9	-	7
chr1	137281919	137281934	cluster:98338	60	-	chr1	137278889	137327076	ENSMUSG00000041879.7	Ipo9	-	15
chr1	137284014	137284019	cluster:98367	52	-	chr1	137278889	137327076	ENSMUSG00000041879.7	Ipo9	-	5
chr1	137286016	137286034	cluster:98381	58	-	chr1	137278889	137327076	ENSMUSG00000041879.7	Ipo9	-	18
chr1	137287194	137287219	cluster:98398	98	-	chr1	137278889	137327076	ENSMUSG00000041879.7	Ipo9	-	25
chr1	137296645	137296656	cluster:98457	35	-	chr1	137278889	137327076	ENSMUSG00000041879.7	Ipo9	-	11
chr1	137298734	137298739	cluster:98471	158	-	chr1	137278889	137327076	ENSMUSG00000041879.7	Ipo9	-	5
chr1	137298858	137298866	cluster:98474	78	-	chr1	137278889	137327076	ENSMUSG00000041879.7	Ipo9	-	8
chr1	137303353	137303364	cluster:98525	71	-	chr1	137278889	137327076	ENSMUSG00000041879.7	Ipo9	-	11
chr1	137326867	137326880	cluster:98635	73	-	chr1	137278889	137327076	ENSMUSG00000041879.7	Ipo9	-	13
chr1	137573834	137573840	cluster:99167	86	-	chr1	137503024	137584682	ENSMUSG00000090399.1	Nav1	-	6
chr1	137922815	137922834	cluster:99374	73	+	chr1	137904796	137931607	ENSMUSG00000026411.11	Tmem9	+	19
chr1	138167102	138167112	cluster:99591	41	-	chr1	138164700	138242681	ENSMUSG00000041570.8	Camsap2	-	10
chr1	138364957	138364966	cluster:99843	90	+	chr1	138364535	138428088	ENSMUSG00000041498.7	Kif14	+	9
chr1	138374172	138374175	cluster:99882	30	+	chr1	138364535	138428088	ENSMUSG00000041498.7	Kif14	+	3
chr1	138382851	138382855	cluster:99914	70	+	chr1	138364535	138428088	ENSMUSG00000041498.7	Kif14	+	4
chr1	138399259	138399263	cluster:99987	62	+	chr1	138364535	138428088	ENSMUSG00000041498.7	Kif14	+	4
chr1	138424900	138424927	cluster:100074	35	+	chr1	138364535	138428088	ENSMUSG00000041498.7	Kif14	+	27
chr1	138523220	138523230	cluster:100513	29	+	chr1	138521478	138526630	ENSMUSG00000041483.8	Zfp281	+	10
chr1	138523369	138523375	cluster:100517	89	+	chr1	138521478	138526630	ENSMUSG00000041483.8	Zfp281	+	6
chr1	138523780	138523802	cluster:100526	92	+	chr1	138521478	138526630	ENSMUSG00000041483.8	Zfp281	+	22
chr1	138523900	138523903	cluster:100531	63	+	chr1	138521478	138526630	ENSMUSG00000041483.8	Zfp281	+	3
chr1	138523925	138523941	cluster:100532	73	+	chr1	138521478	138526630	ENSMUSG00000041483.8	Zfp281	+	16
chr1	138524580	138524595	cluster:100544	189	+	chr1	138521478	138526630	ENSMUSG00000041483.8	Zfp281	+	15
chr1	138524755	138524766	cluster:100549	50	+	chr1	138521478	138526630	ENSMUSG00000041483.8	Zfp281	+	11
chr1	138525169	138525198	cluster:100559	198	+	chr1	138521478	138526630	ENSMUSG00000041483.8	Zfp281	+	29
chr1	138525224	138525247	cluster:100560	91	+	chr1	138521478	138526630	ENSMUSG00000041483.8	Zfp281	+	23
chr1	138525455	138525487	cluster:100566	131	+	chr1	138521478	138526630	ENSMUSG00000041483.8	Zfp281	+	32
chr1	138525650	138525653	cluster:100571	44	+	chr1	138521478	138526630	ENSMUSG00000041483.8	Zfp281	+	3
chr1	138525706	138525718	cluster:100573	198	+	chr1	138521478	138526630	ENSMUSG00000041483.8	Zfp281	+	12
chr1	138526167	138526209	cluster:100585	147	+	chr1	138521478	138526630	ENSMUSG00000041483.8	Zfp281	+	42
chr1	138526419	138526478	cluster:100591	274	+	chr1	138521478	138526630	ENSMUSG00000041483.8	Zfp281	+	59
chr1	138593374	138593391	cluster:100828	53	+	chr1	138592788	138622305	ENSMUSG00000085011.1	Gm16880	+	17
chr1	138593422	138593433	cluster:100830	70	+	chr1	138592788	138622305	ENSMUSG00000085011.1	Gm16880	+	11
chr1	138594372	138594391	cluster:100843	82	+	chr1	138592788	138622305	ENSMUSG00000085011.1	Gm16880	+	19
chr1	138595364	138595377	cluster:100853	132	+	chr1	138592788	138622305	ENSMUSG00000085011.1	Gm16880	+	13
chr1	138595482	138595484	cluster:100855	93	+	chr1	138592788	138622305	ENSMUSG00000085011.1	Gm16880	+	2
chr1	138595906	138595912	cluster:100862	151	+	chr1	138592788	138622305	ENSMUSG00000085011.1	Gm16880	+	6
chr1	138596747	138596761	cluster:100870	95	+	chr1	138592788	138622305	ENSMUSG00000085011.1	Gm16880	+	14
chr1	138602764	138602774	cluster:100922	55	+	chr1	138592788	138622305	ENSMUSG00000085011.1	Gm16880	+	10
chr1	138602840	138602857	cluster:100924	85	+	chr1	138592788	138622305	ENSMUSG00000085011.1	Gm16880	+	17
chr1	138603343	138603358	cluster:100930	67	+	chr1	138592788	138622305	ENSMUSG00000085011.1	Gm16880	+	15
chr1	138603674	138603700	cluster:100936	109	+	chr1	138592788	138622305	ENSMUSG00000085011.1	Gm16880	+	26
chr1	138606435	138606451	cluster:100971	67	+	chr1	138592788	138622305	ENSMUSG00000085011.1	Gm16880	+	16
chr1	138606514	138606525	cluster:100973	82	+	chr1	138592788	138622305	ENSMUSG00000085011.1	Gm16880	+	11
chr1	138607692	138607703	cluster:100988	93	+	chr1	138592788	138622305	ENSMUSG00000085011.1	Gm16880	+	11
chr1	138607756	138607770	cluster:100989	66	+	chr1	138592788	138622305	ENSMUSG00000085011.1	Gm16880	+	14
chr1	138610421	138610438	cluster:101010	51	+	chr1	138592788	138622305	ENSMUSG00000085011.1	Gm16880	+	17
chr1	138611174	138611208	cluster:101026	171	+	chr1	138592788	138622305	ENSMUSG00000085011.1	Gm16880	+	34
chr1	138620853	138620872	cluster:101140	72	+	chr1	138592788	138622305	ENSMUSG00000085011.1	Gm16880	+	19
chr1	138741374	138741392	cluster:101416	122	-	chr1	138740161	138857004	ENSMUSG00000026398.8	Nr5a2	-	18
chr1	138778138	138778156	cluster:101585	133	-	chr1	138740161	138857004	ENSMUSG00000026398.8	Nr5a2	-	18
chr1	138795586	138795590	cluster:101659	66	-	chr1	138740161	138857004	ENSMUSG00000026398.8	Nr5a2	-	4
chr1	138823233	138823243	cluster:101837	118	-	chr1	138740161	138857004	ENSMUSG00000026398.8	Nr5a2	-	10
chr1	138827528	138827542	cluster:101879	94	-	chr1	138740161	138857004	ENSMUSG00000026398.8	Nr5a2	-	14
chr1	140396715	140396725	cluster:102476	40	-	chr1	140381291	140516273	ENSMUSG00000026393.3	Nek7	-	10
chr1	140949943	140949961	cluster:103013	63	+	chr1	140860013	141072620	ENSMUSG00000056268.8	Dennd1b	+	18
chr1	141369635	141369641	cluster:103576	147	+	chr1	141351350	141390667	ENSMUSG00000033952.8	Aspm	+	6
chr1	141369653	141369662	cluster:103577	72	+	chr1	141351350	141390667	ENSMUSG00000033952.8	Aspm	+	9
chr1	141373023	141373026	cluster:103606	28	+	chr1	141351350	141390667	ENSMUSG00000033952.8	Aspm	+	3
chr1	141376005	141376023	cluster:103662	107	+	chr1	141351350	141390667	ENSMUSG00000033952.8	Aspm	+	18
chr1	141376725	141376743	cluster:103676	158	+	chr1	141351350	141390667	ENSMUSG00000033952.8	Aspm	+	18
chr1	141376887	141376895	cluster:103679	65	+	chr1	141351350	141390667	ENSMUSG00000033952.8	Aspm	+	8
chr1	141385050	141385052	cluster:103734	140	+	chr1	141351350	141390667	ENSMUSG00000033952.8	Aspm	+	2
chr1	145452521	145452534	cluster:104860	84	-	chr1	145452292	145453738	ENSMUSG00000078284.2	Cdc73	-	13
chr1	145452521	145452534	cluster:104860	84	-	chr1	145445927	145550023	ENSMUSG00000026361.7	Cdc73	-	13
chr1	145453545	145453566	cluster:104876	65	-	chr1	145452292	145453738	ENSMUSG00000078284.2	Cdc73	-	21
chr1	145453545	145453566	cluster:104876	65	-	chr1	145445927	145550023	ENSMUSG00000026361.7	Cdc73	-	21
chr1	145458176	145458192	cluster:104926	107	-	chr1	145445927	145550023	ENSMUSG00000026361.7	Cdc73	-	16
chr1	145474697	145474717	cluster:105000	159	-	chr1	145445927	145550023	ENSMUSG00000026361.7	Cdc73	-	20
chr1	145490325	145490335	cluster:105076	129	-	chr1	145445927	145550023	ENSMUSG00000026361.7	Cdc73	-	10
chr1	145501109	145501122	cluster:105155	67	-	chr1	145445927	145550023	ENSMUSG00000026361.7	Cdc73	-	13
chr1	145506690	145506700	cluster:105196	82	-	chr1	145445927	145550023	ENSMUSG00000026361.7	Cdc73	-	10
chr1	145514678	145514693	cluster:105267	49	-	chr1	145445927	145550023	ENSMUSG00000026361.7	Cdc73	-	15
chr1	145522594	145522607	cluster:105299	59	-	chr1	145445927	145550023	ENSMUSG00000026361.7	Cdc73	-	13
chr1	145624593	145624603	cluster:105555	96	+	chr1	145624408	145654596	ENSMUSG00000018189.6	Uchl5	+	10
chr1	145644245	145644262	cluster:105681	54	+	chr1	145624408	145654596	ENSMUSG00000018189.6	Uchl5	+	17
chr1	145645595	145645604	cluster:105694	152	+	chr1	145624408	145654596	ENSMUSG00000018189.6	Uchl5	+	9
chr1	145647469	145647481	cluster:105712	82	+	chr1	145624408	145654596	ENSMUSG00000018189.6	Uchl5	+	12
chr1	145647736	145647746	cluster:105713	44	+	chr1	145624408	145654596	ENSMUSG00000018189.6	Uchl5	+	10
chr1	145649304	145649325	cluster:105721	308	+	chr1	145624408	145654596	ENSMUSG00000018189.6	Uchl5	+	21
chr1	145650252	145650262	cluster:105737	111	+	chr1	145624408	145654596	ENSMUSG00000018189.6	Uchl5	+	10
chr1	152242400	152242408	cluster:106907	167	+	chr1	152239968	152297062	ENSMUSG00000006005.9	Tpr	+	8
chr1	152245359	152245379	cluster:106927	62	+	chr1	152239968	152297062	ENSMUSG00000006005.9	Tpr	+	20
chr1	152251019	152251040	cluster:106956	196	+	chr1	152239968	152297062	ENSMUSG00000006005.9	Tpr	+	21
chr1	152256389	152256409	cluster:107006	73	+	chr1	152239968	152297062	ENSMUSG00000006005.9	Tpr	+	20
chr1	152259024	152259038	cluster:107028	63	+	chr1	152239968	152297062	ENSMUSG00000006005.9	Tpr	+	14
chr1	152260062	152260079	cluster:107041	144	+	chr1	152239968	152297062	ENSMUSG00000006005.9	Tpr	+	17
chr1	152260180	152260192	cluster:107043	109	+	chr1	152239968	152297062	ENSMUSG00000006005.9	Tpr	+	12
chr1	152268882	152268890	cluster:107104	61	+	chr1	152239968	152297062	ENSMUSG00000006005.9	Tpr	+	8
chr1	152269671	152269683	cluster:107111	72	+	chr1	152239968	152297062	ENSMUSG00000006005.9	Tpr	+	12
chr1	152270926	152270950	cluster:107128	194	+	chr1	152239968	152297062	ENSMUSG00000006005.9	Tpr	+	24
chr1	152274089	152274099	cluster:107149	62	+	chr1	152239968	152297062	ENSMUSG00000006005.9	Tpr	+	10
chr1	152276575	152276588	cluster:107163	143	+	chr1	152239968	152297062	ENSMUSG00000006005.9	Tpr	+	13
chr1	152277728	152277743	cluster:107174	96	+	chr1	152239968	152297062	ENSMUSG00000006005.9	Tpr	+	15
chr1	152278454	152278470	cluster:107182	101	+	chr1	152239968	152297062	ENSMUSG00000006005.9	Tpr	+	16
chr1	152279567	152279588	cluster:107190	122	+	chr1	152239968	152297062	ENSMUSG00000006005.9	Tpr	+	21
chr1	152280943	152280969	cluster:107207	141	+	chr1	152239968	152297062	ENSMUSG00000006005.9	Tpr	+	26
chr1	152280983	152280994	cluster:107208	86	+	chr1	152239968	152297062	ENSMUSG00000006005.9	Tpr	+	11
chr1	152282809	152282811	cluster:107223	48	+	chr1	152239968	152297062	ENSMUSG00000006005.9	Tpr	+	2
chr1	152282829	152282839	cluster:107224	54	+	chr1	152239968	152297062	ENSMUSG00000006005.9	Tpr	+	10
chr1	152287291	152287317	cluster:107260	158	+	chr1	152239968	152297062	ENSMUSG00000006005.9	Tpr	+	26
chr1	152287590	152287599	cluster:107266	99	+	chr1	152239968	152297062	ENSMUSG00000006005.9	Tpr	+	9
chr1	152294726	152294741	cluster:107323	79	+	chr1	152239968	152297062	ENSMUSG00000006005.9	Tpr	+	15
chr1	153191856	153191870	cluster:107534	47	+	chr1	153191628	153211575	ENSMUSG00000023150.8	Ivns1abp	+	14
chr1	153196506	153196525	cluster:107585	136	+	chr1	153191628	153211575	ENSMUSG00000023150.8	Ivns1abp	+	19
[truncated: 27,926 more rows]

## Sheet: Full Length mRNA lncRNA
irCLIP-seq clusters for full length Spen (mm10)
chr1	3538290	3538299	cluster:1	14	-	chr1	3205901	3671498	ENSMUSG00000051951	Xkr4	-	9
chr1	4775747	4775750	cluster:2	6	-	chr1	4773206	4785739	ENSMUSG00000033845	Mrpl15	-	3
chr1	4776473	4776485	cluster:5	33	-	chr1	4773206	4785739	ENSMUSG00000033845	Mrpl15	-	12
chr1	4776660	4776668	cluster:6	11	-	chr1	4773206	4785739	ENSMUSG00000033845	Mrpl15	-	8
chr1	4776714	4776718	cluster:7	18	-	chr1	4773206	4785739	ENSMUSG00000033845	Mrpl15	-	4
chr1	4776773	4776778	cluster:9	22	-	chr1	4773206	4785739	ENSMUSG00000033845	Mrpl15	-	5
chr1	4777413	4777418	cluster:10	7	-	chr1	4773206	4785739	ENSMUSG00000033845	Mrpl15	-	5
chr1	4777617	4777619	cluster:11	20	-	chr1	4773206	4785739	ENSMUSG00000033845	Mrpl15	-	2
chr1	4777631	4777635	cluster:12	13	-	chr1	4773206	4785739	ENSMUSG00000033845	Mrpl15	-	4
chr1	4781280	4781298	cluster:13	20	-	chr1	4773206	4785739	ENSMUSG00000033845	Mrpl15	-	18
chr1	4782590	4782601	cluster:14	34	-	chr1	4773206	4785739	ENSMUSG00000033845	Mrpl15	-	11
chr1	4782650	4782652	cluster:15	6	-	chr1	4773206	4785739	ENSMUSG00000033845	Mrpl15	-	2
chr1	4782729	4782732	cluster:16	13	-	chr1	4773206	4785739	ENSMUSG00000033845	Mrpl15	-	3
chr1	4785635	4785641	cluster:17	16	-	chr1	4773206	4785739	ENSMUSG00000033845	Mrpl15	-	6
chr1	4807874	4807890	cluster:18	17	+	chr1	4807788	4848410	ENSMUSG00000025903	Lypla1	+	16
chr1	4808466	4808471	cluster:19	10	+	chr1	4807788	4848410	ENSMUSG00000025903	Lypla1	+	5
chr1	4808466	4808471	cluster:19	10	+	chr1	4807892	4886770	ENSMUSG00000104217	Gm37988	+	5
chr1	4845422	4845425	cluster:20	14	+	chr1	4807788	4848410	ENSMUSG00000025903	Lypla1	+	3
chr1	4845422	4845425	cluster:20	14	+	chr1	4807892	4886770	ENSMUSG00000104217	Gm37988	+	3
chr1	4846016	4846024	cluster:21	15	+	chr1	4807788	4848410	ENSMUSG00000025903	Lypla1	+	8
chr1	4846016	4846024	cluster:21	15	+	chr1	4807892	4886770	ENSMUSG00000104217	Gm37988	+	8
chr1	4860800	4860804	cluster:22	8	+	chr1	4857814	4897909	ENSMUSG00000033813	Tcea1	+	4
chr1	4860800	4860804	cluster:22	8	+	chr1	4807892	4886770	ENSMUSG00000104217	Gm37988	+	4
chr1	5083249	5083252	cluster:23	25	+	chr1	5070018	5162529	ENSMUSG00000033793	Atp6v1h	+	3
chr1	5084501	5084505	cluster:24	19	+	chr1	5070018	5162529	ENSMUSG00000033793	Atp6v1h	+	4
chr1	5093376	5093378	cluster:25	11	+	chr1	5070018	5162529	ENSMUSG00000033793	Atp6v1h	+	2
chr1	5124391	5124410	cluster:26	25	+	chr1	5070018	5162529	ENSMUSG00000033793	Atp6v1h	+	19
chr1	5162325	5162334	cluster:27	10	+	chr1	5070018	5162529	ENSMUSG00000033793	Atp6v1h	+	9
chr1	6240289	6240294	cluster:32	11	+	chr1	6206197	6276648	ENSMUSG00000025907	Rb1cc1	+	5
chr1	6243965	6243971	cluster:33	9	+	chr1	6206197	6276648	ENSMUSG00000025907	Rb1cc1	+	6
chr1	6248452	6248458	cluster:34	8	+	chr1	6206197	6276648	ENSMUSG00000025907	Rb1cc1	+	6
chr1	6248860	6248863	cluster:35	13	+	chr1	6206197	6276648	ENSMUSG00000025907	Rb1cc1	+	3
chr1	6249814	6249823	cluster:36	26	+	chr1	6206197	6276648	ENSMUSG00000025907	Rb1cc1	+	9
chr1	6250141	6250152	cluster:37	16	+	chr1	6206197	6276648	ENSMUSG00000025907	Rb1cc1	+	11
chr1	7089157	7089168	cluster:38	16	+	chr1	7088920	7173628	ENSMUSG00000051285	Pcmtd1	+	11
chr1	7089575	7089577	cluster:39	7	+	chr1	7088920	7173628	ENSMUSG00000051285	Pcmtd1	+	2
chr1	7120201	7120205	cluster:40	19	+	chr1	7088920	7173628	ENSMUSG00000051285	Pcmtd1	+	4
chr1	7120485	7120493	cluster:41	23	+	chr1	7088920	7173628	ENSMUSG00000051285	Pcmtd1	+	8
chr1	7120512	7120524	cluster:42	24	+	chr1	7088920	7173628	ENSMUSG00000051285	Pcmtd1	+	12
chr1	7120551	7120564	cluster:43	36	+	chr1	7088920	7173628	ENSMUSG00000051285	Pcmtd1	+	13
chr1	7120583	7120588	cluster:44	17	+	chr1	7088920	7173628	ENSMUSG00000051285	Pcmtd1	+	5
chr1	7120639	7120643	cluster:45	10	+	chr1	7088920	7173628	ENSMUSG00000051285	Pcmtd1	+	4
chr1	7120686	7120689	cluster:46	14	+	chr1	7088920	7173628	ENSMUSG00000051285	Pcmtd1	+	3
chr1	7149204	7149211	cluster:48	10	+	chr1	7148110	7152137	ENSMUSG00000103509	Gm38372	+	7
chr1	7149204	7149211	cluster:48	10	+	chr1	7088920	7173628	ENSMUSG00000051285	Pcmtd1	+	7
chr1	7154022	7154026	cluster:49	21	+	chr1	7088920	7173628	ENSMUSG00000051285	Pcmtd1	+	4
chr1	7154709	7154718	cluster:50	14	+	chr1	7088920	7173628	ENSMUSG00000051285	Pcmtd1	+	9
chr1	7156430	7156433	cluster:51	10	+	chr1	7088920	7173628	ENSMUSG00000051285	Pcmtd1	+	3
chr1	7160248	7160253	cluster:52	10	+	chr1	7088920	7173628	ENSMUSG00000051285	Pcmtd1	+	5
chr1	7169669	7169675	cluster:53	11	+	chr1	7088920	7173628	ENSMUSG00000051285	Pcmtd1	+	6
chr1	7169845	7169866	cluster:54	24	+	chr1	7088920	7173628	ENSMUSG00000051285	Pcmtd1	+	21
chr1	7169936	7169943	cluster:55	7	+	chr1	7088920	7173628	ENSMUSG00000051285	Pcmtd1	+	7
chr1	7397850	7397857	cluster:56	8	-	chr1	7349406	7397869	ENSMUSG00000097797	Gm26901	-	7
chr1	9669960	9669962	cluster:57	12	-	chr1	9667415	9700209	ENSMUSG00000025912	Mybl1	-	2
chr1	9673152	9673156	cluster:58	9	-	chr1	9667415	9700209	ENSMUSG00000025912	Mybl1	-	4
chr1	9673833	9673835	cluster:59	10	-	chr1	9667415	9700209	ENSMUSG00000025912	Mybl1	-	2
chr1	9674327	9674330	cluster:60	12	-	chr1	9667415	9700209	ENSMUSG00000025912	Mybl1	-	3
chr1	9675328	9675333	cluster:61	9	-	chr1	9667415	9700209	ENSMUSG00000025912	Mybl1	-	5
chr1	9675861	9675867	cluster:62	8	-	chr1	9667415	9700209	ENSMUSG00000025912	Mybl1	-	6
chr1	9675914	9675920	cluster:63	12	-	chr1	9667415	9700209	ENSMUSG00000025912	Mybl1	-	6
chr1	9675952	9675986	cluster:64	40	-	chr1	9667415	9700209	ENSMUSG00000025912	Mybl1	-	34
chr1	9676141	9676148	cluster:66	27	-	chr1	9667415	9700209	ENSMUSG00000025912	Mybl1	-	7
chr1	9676210	9676213	cluster:67	21	-	chr1	9667415	9700209	ENSMUSG00000025912	Mybl1	-	3
chr1	9676232	9676238	cluster:68	23	-	chr1	9667415	9700209	ENSMUSG00000025912	Mybl1	-	6
chr1	9676290	9676306	cluster:69	34	-	chr1	9667415	9700209	ENSMUSG00000025912	Mybl1	-	16
chr1	9676325	9676334	cluster:70	7	-	chr1	9667415	9700209	ENSMUSG00000025912	Mybl1	-	9
chr1	9678411	9678414	cluster:71	10	-	chr1	9667415	9700209	ENSMUSG00000025912	Mybl1	-	3
chr1	9685518	9685522	cluster:72	17	-	chr1	9667415	9700209	ENSMUSG00000025912	Mybl1	-	4
chr1	9685539	9685543	cluster:73	15	-	chr1	9667415	9700209	ENSMUSG00000025912	Mybl1	-	4
chr1	9685702	9685715	cluster:75	14	-	chr1	9667415	9700209	ENSMUSG00000025912	Mybl1	-	13
chr1	9685741	9685743	cluster:76	11	-	chr1	9667415	9700209	ENSMUSG00000025912	Mybl1	-	2
chr1	9687568	9687574	cluster:77	17	-	chr1	9667415	9700209	ENSMUSG00000025912	Mybl1	-	6
chr1	9687618	9687628	cluster:78	15	-	chr1	9667415	9700209	ENSMUSG00000025912	Mybl1	-	10
chr1	9700087	9700091	cluster:79	14	-	chr1	9667415	9700209	ENSMUSG00000025912	Mybl1	-	4
chr1	9724474	9724476	cluster:80	20	-	chr1	9718622	9748382	ENSMUSG00000045210	Vcpip1	-	2
chr1	9724667	9724670	cluster:81	15	-	chr1	9718622	9748382	ENSMUSG00000045210	Vcpip1	-	3
chr1	9724725	9724727	cluster:82	18	-	chr1	9718622	9748382	ENSMUSG00000045210	Vcpip1	-	2
chr1	9724954	9724956	cluster:83	13	-	chr1	9718622	9748382	ENSMUSG00000045210	Vcpip1	-	2
chr1	9725027	9725036	cluster:84	12	-	chr1	9718622	9748382	ENSMUSG00000045210	Vcpip1	-	9
chr1	9725127	9725151	cluster:85	19	-	chr1	9718622	9748382	ENSMUSG00000045210	Vcpip1	-	24
chr1	9725292	9725300	cluster:86	7	-	chr1	9718622	9748382	ENSMUSG00000045210	Vcpip1	-	8
chr1	9725323	9725327	cluster:87	15	-	chr1	9718622	9748382	ENSMUSG00000045210	Vcpip1	-	4
chr1	9745464	9745466	cluster:88	7	-	chr1	9718622	9748382	ENSMUSG00000045210	Vcpip1	-	2
chr1	9745504	9745508	cluster:89	11	-	chr1	9718622	9748382	ENSMUSG00000045210	Vcpip1	-	4
chr1	9745704	9745722	cluster:90	22	-	chr1	9718622	9748382	ENSMUSG00000045210	Vcpip1	-	18
chr1	9745909	9745911	cluster:91	11	-	chr1	9718622	9748382	ENSMUSG00000045210	Vcpip1	-	2
chr1	9746077	9746084	cluster:92	15	-	chr1	9718622	9748382	ENSMUSG00000045210	Vcpip1	-	7
chr1	9746110	9746116	cluster:93	8	-	chr1	9718622	9748382	ENSMUSG00000045210	Vcpip1	-	6
chr1	9746489	9746494	cluster:94	9	-	chr1	9718622	9748382	ENSMUSG00000045210	Vcpip1	-	5
chr1	9746710	9746727	cluster:95	13	-	chr1	9718622	9748382	ENSMUSG00000045210	Vcpip1	-	17
chr1	9746997	9747008	cluster:96	7	-	chr1	9718622	9748382	ENSMUSG00000045210	Vcpip1	-	11
chr1	9747191	9747201	cluster:97	24	-	chr1	9718622	9748382	ENSMUSG00000045210	Vcpip1	-	10
chr1	9747243	9747246	cluster:98	14	-	chr1	9718622	9748382	ENSMUSG00000045210	Vcpip1	-	3
chr1	9747379	9747383	cluster:99	11	-	chr1	9718622	9748382	ENSMUSG00000045210	Vcpip1	-	4
chr1	9747810	9747818	cluster:101	12	-	chr1	9718622	9748382	ENSMUSG00000045210	Vcpip1	-	8
chr1	9747868	9747870	cluster:102	7	-	chr1	9718622	9748382	ENSMUSG00000045210	Vcpip1	-	2
chr1	9747950	9747958	cluster:103	11	-	chr1	9718622	9748382	ENSMUSG00000045210	Vcpip1	-	8
chr1	9748355	9748362	cluster:104	29	-	chr1	9718622	9748382	ENSMUSG00000045210	Vcpip1	-	7
chr1	9942109	9942116	cluster:109	14	-	chr1	9941959	9944118	ENSMUSG00000098234	Snhg6	-	7
chr1	9942146	9942149	cluster:110	30	-	chr1	9941959	9944118	ENSMUSG00000098234	Snhg6	-	3
chr1	9942164	9942166	cluster:111	26	-	chr1	9941959	9944118	ENSMUSG00000098234	Snhg6	-	2
chr1	9942214	9942237	cluster:112	23	-	chr1	9941959	9944118	ENSMUSG00000098234	Snhg6	-	23
chr1	9942326	9942349	cluster:113	49	-	chr1	9941959	9944118	ENSMUSG00000098234	Snhg6	-	23
chr1	9942360	9942372	cluster:114	38	-	chr1	9941959	9944118	ENSMUSG00000098234	Snhg6	-	12
chr1	9942497	9942562	cluster:115	165	-	chr1	9941959	9944118	ENSMUSG00000098234	Snhg6	-	65
chr1	9942577	9942586	cluster:116	9	-	chr1	9941959	9944118	ENSMUSG00000098234	Snhg6	-	9
chr1	9942614	9942680	cluster:117	101	-	chr1	9941959	9944118	ENSMUSG00000098234	Snhg6	-	66
chr1	9942719	9942729	cluster:118	19	-	chr1	9941959	9944118	ENSMUSG00000098234	Snhg6	-	10
chr1	9942749	9942760	cluster:119	9	-	chr1	9941959	9944118	ENSMUSG00000098234	Snhg6	-	11
chr1	9943069	9943074	cluster:120	27	-	chr1	9941959	9944118	ENSMUSG00000098234	Snhg6	-	5
chr1	9943105	9943113	cluster:121	27	-	chr1	9941959	9944118	ENSMUSG00000098234	Snhg6	-	8
chr1	9943153	9943160	cluster:122	15	-	chr1	9941959	9944118	ENSMUSG00000098234	Snhg6	-	7
chr1	9943241	9943244	cluster:123	10	-	chr1	9941959	9944118	ENSMUSG00000098234	Snhg6	-	3
chr1	9943295	9943307	cluster:124	19	-	chr1	9941959	9944118	ENSMUSG00000098234	Snhg6	-	12
chr1	9943337	9943382	cluster:125	53	-	chr1	9941959	9944118	ENSMUSG00000098234	Snhg6	-	45
chr1	9943402	9943408	cluster:126	20	-	chr1	9941959	9944118	ENSMUSG00000098234	Snhg6	-	6
chr1	9943420	9943428	cluster:127	22	-	chr1	9941959	9944118	ENSMUSG00000098234	Snhg6	-	8
chr1	9943484	9943493	cluster:128	29	-	chr1	9941959	9944118	ENSMUSG00000098234	Snhg6	-	9
chr1	9943541	9943557	cluster:129	30	-	chr1	9941959	9944118	ENSMUSG00000098234	Snhg6	-	16
chr1	9943583	9943614	cluster:130	65	-	chr1	9941959	9944118	ENSMUSG00000098234	Snhg6	-	31
chr1	9943644	9943651	cluster:131	20	-	chr1	9941959	9944118	ENSMUSG00000098234	Snhg6	-	7
chr1	9943675	9943679	cluster:132	28	-	chr1	9941959	9944118	ENSMUSG00000098234	Snhg6	-	4
chr1	9943710	9943724	cluster:133	49	-	chr1	9941959	9944118	ENSMUSG00000098234	Snhg6	-	14
chr1	9943737	9943748	cluster:134	56	-	chr1	9941959	9944118	ENSMUSG00000098234	Snhg6	-	11
chr1	9943773	9943777	cluster:135	16	-	chr1	9941959	9944118	ENSMUSG00000098234	Snhg6	-	4
chr1	9943826	9943844	cluster:136	31	-	chr1	9941959	9944118	ENSMUSG00000098234	Snhg6	-	18
chr1	9943914	9943920	cluster:137	23	-	chr1	9941959	9944118	ENSMUSG00000098234	Snhg6	-	6
chr1	9943957	9943959	cluster:138	17	-	chr1	9941959	9944118	ENSMUSG00000098234	Snhg6	-	2
chr1	9943995	9943999	cluster:139	37	-	chr1	9941959	9944118	ENSMUSG00000098234	Snhg6	-	4
chr1	9944010	9944025	cluster:140	41	-	chr1	9941959	9944118	ENSMUSG00000098234	Snhg6	-	15
chr1	9944102	9944122	cluster:141	45	-	chr1	9941959	9944118	ENSMUSG00000098234	Snhg6	-	16
chr1	10030684	10030687	cluster:143	14	-	chr1	10024601	10038168	ENSMUSG00000025917	Cops5	-	3
chr1	10032420	10032423	cluster:144	7	-	chr1	10024601	10038168	ENSMUSG00000025917	Cops5	-	3
chr1	10034019	10034022	cluster:145	14	-	chr1	10024601	10038168	ENSMUSG00000025917	Cops5	-	3
chr1	10035268	10035270	cluster:146	7	-	chr1	10024601	10038168	ENSMUSG00000025917	Cops5	-	2
chr1	10037072	10037076	cluster:147	7	-	chr1	10024601	10038168	ENSMUSG00000025917	Cops5	-	4
chr1	10037399	10037402	cluster:149	17	-	chr1	10024601	10038168	ENSMUSG00000025917	Cops5	-	3
chr1	10037892	10037894	cluster:151	9	-	chr1	10024601	10038168	ENSMUSG00000025917	Cops5	-	2
chr1	10045168	10045170	cluster:152	10	+	chr1	10037987	10136768	ENSMUSG00000056763	Cspp1	+	2
chr1	10058739	10058741	cluster:153	19	+	chr1	10037987	10136768	ENSMUSG00000056763	Cspp1	+	2
chr1	10058761	10058779	cluster:154	14	+	chr1	10037987	10136768	ENSMUSG00000056763	Cspp1	+	18
chr1	10066330	10066333	cluster:156	11	+	chr1	10037987	10136768	ENSMUSG00000056763	Cspp1	+	3
chr1	10066410	10066413	cluster:157	7	+	chr1	10037987	10136768	ENSMUSG00000056763	Cspp1	+	3
chr1	10066571	10066574	cluster:158	22	+	chr1	10037987	10136768	ENSMUSG00000056763	Cspp1	+	3
chr1	10066590	10066592	cluster:159	8	+	chr1	10037987	10136768	ENSMUSG00000056763	Cspp1	+	2
chr1	10066618	10066620	cluster:160	11	+	chr1	10037987	10136768	ENSMUSG00000056763	Cspp1	+	2
chr1	10066641	10066644	cluster:161	17	+	chr1	10037987	10136768	ENSMUSG00000056763	Cspp1	+	3
chr1	10066716	10066724	cluster:162	20	+	chr1	10037987	10136768	ENSMUSG00000056763	Cspp1	+	8
chr1	10066822	10066845	cluster:163	20	+	chr1	10037987	10136768	ENSMUSG00000056763	Cspp1	+	23
chr1	10066869	10066877	cluster:164	9	+	chr1	10037987	10136768	ENSMUSG00000056763	Cspp1	+	8
chr1	10066912	10066921	cluster:165	13	+	chr1	10037987	10136768	ENSMUSG00000056763	Cspp1	+	9
chr1	10066946	10066950	cluster:166	9	+	chr1	10037987	10136768	ENSMUSG00000056763	Cspp1	+	4
chr1	10074385	10074394	cluster:167	9	+	chr1	10037987	10136768	ENSMUSG00000056763	Cspp1	+	9
chr1	10083523	10083538	cluster:169	17	+	chr1	10037987	10136768	ENSMUSG00000056763	Cspp1	+	15
chr1	10095945	10095951	cluster:171	12	+	chr1	10037987	10136768	ENSMUSG00000056763	Cspp1	+	6
chr1	10104311	10104313	cluster:172	15	+	chr1	10037987	10136768	ENSMUSG00000056763	Cspp1	+	2
chr1	10112627	10112637	cluster:173	9	+	chr1	10037987	10136768	ENSMUSG00000056763	Cspp1	+	10
chr1	10112898	10112907	cluster:174	10	+	chr1	10037987	10136768	ENSMUSG00000056763	Cspp1	+	9
chr1	10138434	10138445	cluster:176	12	-	chr1	10137571	10232670	ENSMUSG00000067851	Arfgef1	-	11
chr1	10160870	10160878	cluster:177	11	-	chr1	10137571	10232670	ENSMUSG00000067851	Arfgef1	-	8
chr1	10173214	10173217	cluster:178	10	-	chr1	10137571	10232670	ENSMUSG00000067851	Arfgef1	-	3
chr1	10180947	10180949	cluster:179	8	-	chr1	10137571	10232670	ENSMUSG00000067851	Arfgef1	-	2
chr1	10183683	10183685	cluster:180	13	-	chr1	10137571	10232670	ENSMUSG00000067851	Arfgef1	-	2
chr1	10184394	10184396	cluster:181	8	-	chr1	10137571	10232670	ENSMUSG00000067851	Arfgef1	-	2
chr1	10188798	10188816	cluster:182	20	-	chr1	10137571	10232670	ENSMUSG00000067851	Arfgef1	-	18
chr1	10209116	10209128	cluster:183	8	-	chr1	10137571	10232670	ENSMUSG00000067851	Arfgef1	-	12
chr1	10209378	10209390	cluster:184	10	-	chr1	10137571	10232670	ENSMUSG00000067851	Arfgef1	-	12
chr1	10209570	10209573	cluster:186	10	-	chr1	10137571	10232670	ENSMUSG00000067851	Arfgef1	-	3
chr1	10213135	10213142	cluster:187	10	-	chr1	10137571	10232670	ENSMUSG00000067851	Arfgef1	-	7
chr1	10213214	10213220	cluster:188	25	-	chr1	10137571	10232670	ENSMUSG00000067851	Arfgef1	-	6
chr1	10213237	10213243	cluster:189	15	-	chr1	10137571	10232670	ENSMUSG00000067851	Arfgef1	-	6
chr1	10215904	10215907	cluster:190	23	-	chr1	10137571	10232670	ENSMUSG00000067851	Arfgef1	-	3
chr1	10232430	10232439	cluster:192	11	-	chr1	10137571	10232670	ENSMUSG00000067851	Arfgef1	-	9
chr1	12692589	12692596	cluster:194	18	+	chr1	12692277	12861192	ENSMUSG00000016918	Sulf1	+	7
chr1	12692619	12692626	cluster:195	21	+	chr1	12692277	12861192	ENSMUSG00000016918	Sulf1	+	7
chr1	12692645	12692649	cluster:196	13	+	chr1	12692277	12861192	ENSMUSG00000016918	Sulf1	+	4
chr1	12709451	12709455	cluster:197	7	+	chr1	12692277	12861192	ENSMUSG00000016918	Sulf1	+	4
chr1	12719313	12719317	cluster:198	14	+	chr1	12692277	12861192	ENSMUSG00000016918	Sulf1	+	4
chr1	12725950	12725961	cluster:199	11	+	chr1	12692277	12861192	ENSMUSG00000016918	Sulf1	+	11
chr1	12774799	12774802	cluster:200	23	+	chr1	12692277	12861192	ENSMUSG00000016918	Sulf1	+	3
chr1	12796911	12796916	cluster:202	7	+	chr1	12692277	12861192	ENSMUSG00000016918	Sulf1	+	5
chr1	12813363	12813365	cluster:203	7	+	chr1	12692277	12861192	ENSMUSG00000016918	Sulf1	+	2
chr1	12814047	12814049	cluster:204	7	+	chr1	12692277	12861192	ENSMUSG00000016918	Sulf1	+	2
chr1	12831090	12831100	cluster:205	11	+	chr1	12692277	12861192	ENSMUSG00000016918	Sulf1	+	10
chr1	12848100	12848104	cluster:207	8	+	chr1	12692277	12861192	ENSMUSG00000016918	Sulf1	+	4
chr1	13173936	13173938	cluster:211	10	-	chr1	13139105	13374083	ENSMUSG00000005886	Ncoa2	-	2
chr1	13174223	13174230	cluster:212	12	-	chr1	13139105	13374083	ENSMUSG00000005886	Ncoa2	-	7
chr1	13565834	13565838	cluster:214	14	-	chr1	13564698	13589910	ENSMUSG00000025935	Tram1	-	4
chr1	13589667	13589672	cluster:216	16	-	chr1	13564698	13589910	ENSMUSG00000025935	Tram1	-	5
chr1	13589898	13589903	cluster:217	31	-	chr1	13564698	13589910	ENSMUSG00000025935	Tram1	-	5
chr1	13625604	13625609	cluster:218	10	-	chr1	13623330	13660546	ENSMUSG00000025937	Lactb2	-	5
chr1	13626551	13626555	cluster:219	9	-	chr1	13623330	13660546	ENSMUSG00000025937	Lactb2	-	4
chr1	13626701	13626703	cluster:220	11	-	chr1	13623330	13660546	ENSMUSG00000025937	Lactb2	-	2
chr1	13626800	13626806	cluster:221	12	-	chr1	13623330	13660546	ENSMUSG00000025937	Lactb2	-	6
chr1	13630091	13630103	cluster:222	26	-	chr1	13623330	13660546	ENSMUSG00000025937	Lactb2	-	12
chr1	13630123	13630136	cluster:223	29	-	chr1	13623330	13660546	ENSMUSG00000025937	Lactb2	-	13
chr1	13638283	13638292	cluster:224	26	-	chr1	13623330	13660546	ENSMUSG00000025937	Lactb2	-	9
chr1	13647408	13647416	cluster:225	23	-	chr1	13623330	13660546	ENSMUSG00000025937	Lactb2	-	8
chr1	13647428	13647434	cluster:226	20	-	chr1	13623330	13660546	ENSMUSG00000025937	Lactb2	-	6
chr1	13650729	13650743	cluster:227	17	-	chr1	13623330	13660546	ENSMUSG00000025937	Lactb2	-	14
chr1	13650832	13650844	cluster:228	22	-	chr1	13623330	13660546	ENSMUSG00000025937	Lactb2	-	12
chr1	15805671	15805686	cluster:229	22	+	chr1	15805646	15844052	ENSMUSG00000025925	Terf1	+	15
chr1	15805734	15805737	cluster:230	18	+	chr1	15805646	15844052	ENSMUSG00000025925	Terf1	+	3
chr1	15805905	15805912	cluster:231	13	+	chr1	15805646	15844052	ENSMUSG00000025925	Terf1	+	7
chr1	15805929	15805937	cluster:232	20	+	chr1	15805646	15844052	ENSMUSG00000025925	Terf1	+	8
chr1	15806099	15806101	cluster:233	6	+	chr1	15805646	15844052	ENSMUSG00000025925	Terf1	+	2
chr1	15807640	15807649	cluster:234	25	+	chr1	15805646	15844052	ENSMUSG00000025925	Terf1	+	9
chr1	15807661	15807666	cluster:235	22	+	chr1	15805646	15844052	ENSMUSG00000025925	Terf1	+	5
chr1	15807714	15807719	cluster:236	26	+	chr1	15805646	15844052	ENSMUSG00000025925	Terf1	+	5
chr1	15807816	15807826	cluster:237	14	+	chr1	15805646	15844052	ENSMUSG00000025925	Terf1	+	10
chr1	15812706	15812711	cluster:238	12	+	chr1	15805646	15844052	ENSMUSG00000025925	Terf1	+	5
chr1	15813046	15813049	cluster:239	18	+	chr1	15805646	15844052	ENSMUSG00000025925	Terf1	+	3
chr1	15813067	15813069	cluster:240	27	+	chr1	15805646	15844052	ENSMUSG00000025925	Terf1	+	2
chr1	15817961	15817965	cluster:241	9	+	chr1	15805646	15844052	ENSMUSG00000025925	Terf1	+	4
chr1	15818917	15818926	cluster:242	13	+	chr1	15805646	15844052	ENSMUSG00000025925	Terf1	+	9
chr1	15819027	15819036	cluster:243	9	+	chr1	15805646	15844052	ENSMUSG00000025925	Terf1	+	9
chr1	15842938	15842947	cluster:245	22	+	chr1	15805646	15844052	ENSMUSG00000025925	Terf1	+	9
chr1	15843004	15843006	cluster:246	21	+	chr1	15805646	15844052	ENSMUSG00000025925	Terf1	+	2
chr1	15843145	15843153	cluster:247	19	+	chr1	15805646	15844052	ENSMUSG00000025925	Terf1	+	8
chr1	15843202	15843213	cluster:248	12	+	chr1	15805646	15844052	ENSMUSG00000025925	Terf1	+	11
chr1	15843263	15843271	cluster:249	26	+	chr1	15805646	15844052	ENSMUSG00000025925	Terf1	+	8
chr1	15843323	15843326	cluster:250	14	+	chr1	15805646	15844052	ENSMUSG00000025925	Terf1	+	3
chr1	15843361	15843366	cluster:251	9	+	chr1	15805646	15844052	ENSMUSG00000025925	Terf1	+	5
chr1	16101464	16101471	cluster:253	25	-	chr1	16101295	16104662	ENSMUSG00000043716	Rpl7	-	7
chr1	16101605	16101608	cluster:254	25	-	chr1	16101295	16104662	ENSMUSG00000043716	Rpl7	-	3
chr1	16101634	16101644	cluster:255	31	-	chr1	16101295	16104662	ENSMUSG00000043716	Rpl7	-	10
chr1	16101737	16101746	cluster:256	16	-	chr1	16101295	16104662	ENSMUSG00000043716	Rpl7	-	9
chr1	16102170	16102176	cluster:257	12	-	chr1	16101295	16104662	ENSMUSG00000043716	Rpl7	-	6
chr1	16102397	16102403	cluster:258	20	-	chr1	16101295	16104662	ENSMUSG00000043716	Rpl7	-	6
chr1	16102511	16102513	cluster:259	9	-	chr1	16101295	16104662	ENSMUSG00000043716	Rpl7	-	2
chr1	16102726	16102732	cluster:260	28	-	chr1	16101295	16104662	ENSMUSG00000043716	Rpl7	-	6
chr1	16103091	16103097	cluster:261	18	-	chr1	16101295	16104662	ENSMUSG00000043716	Rpl7	-	6
chr1	16103172	16103187	cluster:262	35	-	chr1	16101295	16104662	ENSMUSG00000043716	Rpl7	-	15
chr1	16103305	16103313	cluster:263	14	-	chr1	16101295	16104662	ENSMUSG00000043716	Rpl7	-	8
chr1	16103415	16103422	cluster:264	10	-	chr1	16101295	16104662	ENSMUSG00000043716	Rpl7	-	7
chr1	16103456	16103458	cluster:265	11	-	chr1	16101295	16104662	ENSMUSG00000043716	Rpl7	-	2
chr1	16103717	16103720	cluster:266	15	-	chr1	16101295	16104662	ENSMUSG00000043716	Rpl7	-	3
chr1	16103732	16103735	cluster:267	11	-	chr1	16101295	16104662	ENSMUSG00000043716	Rpl7	-	3
chr1	16103751	16103768	cluster:268	16	-	chr1	16101295	16104662	ENSMUSG00000043716	Rpl7	-	17
chr1	16103945	16103949	cluster:269	11	-	chr1	16101295	16104662	ENSMUSG00000043716	Rpl7	-	4
chr1	16104391	16104407	cluster:270	18	-	chr1	16101295	16104662	ENSMUSG00000043716	Rpl7	-	16
chr1	16598266	16598269	cluster:271	9	-	chr1	16540790	16619489	ENSMUSG00000025939	Ube2w	-	3
chr1	16600963	16600965	cluster:272	9	-	chr1	16540790	16619489	ENSMUSG00000025939	Ube2w	-	2
chr1	16647968	16647970	cluster:274	6	-	chr1	16641725	16657042	ENSMUSG00000079658	Eloc	-	2
chr1	16656867	16656869	cluster:275	34	-	chr1	16641725	16657042	ENSMUSG00000079658	Eloc	-	2
chr1	16677011	16677014	cluster:276	7	+	chr1	16665207	16678275	ENSMUSG00000025940	Tmem70	+	3
chr1	16677074	16677083	cluster:277	33	+	chr1	16665207	16678275	ENSMUSG00000025940	Tmem70	+	9
chr1	16677128	16677156	cluster:278	27	+	chr1	16665207	16678275	ENSMUSG00000025940	Tmem70	+	28
chr1	16677206	16677209	cluster:279	14	+	chr1	16665207	16678275	ENSMUSG00000025940	Tmem70	+	3
chr1	16677227	16677229	cluster:280	15	+	chr1	16665207	16678275	ENSMUSG00000025940	Tmem70	+	2
chr1	16677265	16677272	cluster:281	16	+	chr1	16665207	16678275	ENSMUSG00000025940	Tmem70	+	7
chr1	16677320	16677323	cluster:282	14	+	chr1	16665207	16678275	ENSMUSG00000025940	Tmem70	+	3
chr1	16677430	16677434	cluster:283	8	+	chr1	16665207	16678275	ENSMUSG00000025940	Tmem70	+	4
chr1	17091433	17091438	cluster:284	15	-	chr1	16964560	17097889	ENSMUSG00000042686	Jph1	-	5
chr1	17091641	17091646	cluster:285	15	-	chr1	16964560	17097889	ENSMUSG00000042686	Jph1	-	5
chr1	17097582	17097585	cluster:286	14	-	chr1	16964560	17097889	ENSMUSG00000042686	Jph1	-	3
chr1	20803020	20803027	cluster:289	17	-	chr1	20802968	20820312	ENSMUSG00000041859	Mcm3	-	7
chr1	20803052	20803055	cluster:290	9	-	chr1	20802968	20820312	ENSMUSG00000041859	Mcm3	-	3
chr1	20803082	20803093	cluster:291	25	-	chr1	20802968	20820312	ENSMUSG00000041859	Mcm3	-	11
chr1	20803104	20803125	cluster:292	34	-	chr1	20802968	20820312	ENSMUSG00000041859	Mcm3	-	21
chr1	20803185	20803205	cluster:293	56	-	chr1	20802968	20820312	ENSMUSG00000041859	Mcm3	-	20
chr1	20803227	20803264	cluster:294	54	-	chr1	20802968	20820312	ENSMUSG00000041859	Mcm3	-	37
chr1	20803340	20803345	cluster:295	8	-	chr1	20802968	20820312	ENSMUSG00000041859	Mcm3	-	5
chr1	20803383	20803396	cluster:296	51	-	chr1	20802968	20820312	ENSMUSG00000041859	Mcm3	-	13
chr1	20803425	20803446	cluster:297	70	-	chr1	20802968	20820312	ENSMUSG00000041859	Mcm3	-	21
chr1	20803459	20803472	cluster:298	49	-	chr1	20802968	20820312	ENSMUSG00000041859	Mcm3	-	13
chr1	20803488	20803506	cluster:299	52	-	chr1	20802968	20820312	ENSMUSG00000041859	Mcm3	-	18
chr1	20803568	20803570	cluster:300	9	-	chr1	20802968	20820312	ENSMUSG00000041859	Mcm3	-	2
chr1	20803642	20803645	cluster:301	27	-	chr1	20802968	20820312	ENSMUSG00000041859	Mcm3	-	3
chr1	20804827	20804833	cluster:302	11	-	chr1	20802968	20820312	ENSMUSG00000041859	Mcm3	-	6
chr1	20804889	20804899	cluster:303	15	-	chr1	20802968	20820312	ENSMUSG00000041859	Mcm3	-	10
chr1	20805289	20805329	cluster:304	63	-	chr1	20802968	20820312	ENSMUSG00000041859	Mcm3	-	40
chr1	20805800	20805803	cluster:305	9	-	chr1	20802968	20820312	ENSMUSG00000041859	Mcm3	-	3
chr1	20805814	20805822	cluster:306	56	-	chr1	20802968	20820312	ENSMUSG00000041859	Mcm3	-	8
chr1	20805842	20805855	cluster:307	58	-	chr1	20802968	20820312	ENSMUSG00000041859	Mcm3	-	13
chr1	20805866	20805907	cluster:308	76	-	chr1	20802968	20820312	ENSMUSG00000041859	Mcm3	-	41
chr1	20806745	20806759	cluster:309	47	-	chr1	20802968	20820312	ENSMUSG00000041859	Mcm3	-	14
chr1	20806870	20806879	cluster:310	13	-	chr1	20802968	20820312	ENSMUSG00000041859	Mcm3	-	9
chr1	20808616	20808626	cluster:311	13	-	chr1	20802968	20820312	ENSMUSG00000041859	Mcm3	-	10
chr1	20808759	20808764	cluster:312	23	-	chr1	20802968	20820312	ENSMUSG00000041859	Mcm3	-	5
chr1	20808781	20808783	cluster:313	28	-	chr1	20802968	20820312	ENSMUSG00000041859	Mcm3	-	2
chr1	20808814	20808817	cluster:314	94	-	chr1	20802968	20820312	ENSMUSG00000041859	Mcm3	-	3
chr1	20808830	20808857	cluster:315	110	-	chr1	20802968	20820312	ENSMUSG00000041859	Mcm3	-	27
chr1	20809601	20809626	cluster:316	39	-	chr1	20802968	20820312	ENSMUSG00000041859	Mcm3	-	25
chr1	20809638	20809642	cluster:317	48	-	chr1	20802968	20820312	ENSMUSG00000041859	Mcm3	-	4
chr1	20809669	20809672	cluster:318	30	-	chr1	20802968	20820312	ENSMUSG00000041859	Mcm3	-	3
chr1	20809715	20809721	cluster:319	13	-	chr1	20802968	20820312	ENSMUSG00000041859	Mcm3	-	6
chr1	20810063	20810067	cluster:320	11	-	chr1	20802968	20820312	ENSMUSG00000041859	Mcm3	-	4
chr1	20810085	20810091	cluster:321	26	-	chr1	20802968	20820312	ENSMUSG00000041859	Mcm3	-	6
chr1	20810187	20810189	cluster:322	21	-	chr1	20802968	20820312	ENSMUSG00000041859	Mcm3	-	2
chr1	20810217	20810221	cluster:323	15	-	chr1	20802968	20820312	ENSMUSG00000041859	Mcm3	-	4
chr1	20812104	20812111	cluster:324	11	-	chr1	20802968	20820312	ENSMUSG00000041859	Mcm3	-	7
chr1	20814702	20814708	cluster:325	13	-	chr1	20802968	20820312	ENSMUSG00000041859	Mcm3	-	6
chr1	20814796	20814800	cluster:327	13	-	chr1	20802968	20820312	ENSMUSG00000041859	Mcm3	-	4
chr1	20816658	20816662	cluster:328	12	-	chr1	20802968	20820312	ENSMUSG00000041859	Mcm3	-	4
chr1	20816715	20816727	cluster:329	19	-	chr1	20802968	20820312	ENSMUSG00000041859	Mcm3	-	12
chr1	20817152	20817156	cluster:330	8	-	chr1	20802968	20820312	ENSMUSG00000041859	Mcm3	-	4
chr1	20817395	20817416	cluster:331	17	-	chr1	20802968	20820312	ENSMUSG00000041859	Mcm3	-	21
chr1	20817889	20817893	cluster:332	14	-	chr1	20802968	20820312	ENSMUSG00000041859	Mcm3	-	4
chr1	20820217	20820223	cluster:333	63	-	chr1	20802968	20820312	ENSMUSG00000041859	Mcm3	-	6
chr1	20820236	20820238	cluster:334	15	-	chr1	20802968	20820312	ENSMUSG00000041859	Mcm3	-	2
chr1	20820273	20820278	cluster:335	9	-	chr1	20802968	20820312	ENSMUSG00000041859	Mcm3	-	5
chr1	20935153	20935158	cluster:336	13	+	chr1	20890606	20939650	ENSMUSG00000025931	Paqr8	+	5
chr1	23845688	23845691	cluster:340	12	-	chr1	23844846	23922317	ENSMUSG00000026155	Smap1	-	3
chr1	23846332	23846336	cluster:341	16	-	chr1	23844846	23922317	ENSMUSG00000026155	Smap1	-	4
chr1	23848502	23848508	cluster:342	17	-	chr1	23844846	23922317	ENSMUSG00000026155	Smap1	-	6
chr1	23848542	23848546	cluster:343	11	-	chr1	23844846	23922317	ENSMUSG00000026155	Smap1	-	4
chr1	23877729	23877741	cluster:344	38	-	chr1	23844846	23922317	ENSMUSG00000026155	Smap1	-	12
chr1	24005570	24005577	cluster:345	17	-	chr1	23995939	24005656	ENSMUSG00000026154	Sdhaf4	-	7
chr1	24012045	24012047	cluster:346	7	-	chr1	24011093	24100341	ENSMUSG00000026153	Fam135a	-	2
chr1	24026890	24026893	cluster:347	7	-	chr1	24011093	24100341	ENSMUSG00000026153	Fam135a	-	3
chr1	24028245	24028260	cluster:348	17	-	chr1	24011093	24100341	ENSMUSG00000026153	Fam135a	-	15
chr1	24028311	24028320	cluster:349	19	-	chr1	24011093	24100341	ENSMUSG00000026153	Fam135a	-	9
chr1	24028363	24028369	cluster:350	16	-	chr1	24011093	24100341	ENSMUSG00000026153	Fam135a	-	6
chr1	24028491	24028505	cluster:351	26	-	chr1	24011093	24100341	ENSMUSG00000026153	Fam135a	-	14
chr1	24029335	24029337	cluster:352	8	-	chr1	24011093	24100341	ENSMUSG00000026153	Fam135a	-	2
chr1	24029420	24029423	cluster:353	8	-	chr1	24011093	24100341	ENSMUSG00000026153	Fam135a	-	3
chr1	24029636	24029639	cluster:354	9	-	chr1	24011093	24100341	ENSMUSG00000026153	Fam135a	-	3
chr1	24029711	24029713	cluster:355	8	-	chr1	24011093	24100341	ENSMUSG00000026153	Fam135a	-	2
chr1	24031046	24031049	cluster:356	15	-	chr1	24011093	24100341	ENSMUSG00000026153	Fam135a	-	3
chr1	24044192	24044203	cluster:357	13	-	chr1	24011093	24100341	ENSMUSG00000026153	Fam135a	-	11
chr1	24053056	24053059	cluster:358	8	-	chr1	24011093	24100341	ENSMUSG00000026153	Fam135a	-	3
chr1	24086595	24086602	cluster:359	8	-	chr1	24011093	24100341	ENSMUSG00000026153	Fam135a	-	7
chr1	30802689	30802701	cluster:362	13	-	chr1	30802339	30873921	ENSMUSG00000048874	Phf3	-	12
chr1	30803169	30803182	cluster:363	16	-	chr1	30802339	30873921	ENSMUSG00000048874	Phf3	-	13
chr1	30803194	30803208	cluster:364	19	-	chr1	30802339	30873921	ENSMUSG00000048874	Phf3	-	14
chr1	30803239	30803246	cluster:365	12	-	chr1	30802339	30873921	ENSMUSG00000048874	Phf3	-	7
chr1	30803270	30803273	cluster:366	17	-	chr1	30802339	30873921	ENSMUSG00000048874	Phf3	-	3
chr1	30803481	30803508	cluster:367	31	-	chr1	30802339	30873921	ENSMUSG00000048874	Phf3	-	27
chr1	30803531	30803544	cluster:368	13	-	chr1	30802339	30873921	ENSMUSG00000048874	Phf3	-	13
chr1	30803602	30803632	cluster:369	45	-	chr1	30802339	30873921	ENSMUSG00000048874	Phf3	-	30
chr1	30803694	30803697	cluster:370	16	-	chr1	30802339	30873921	ENSMUSG00000048874	Phf3	-	3
chr1	30803753	30803772	cluster:371	34	-	chr1	30802339	30873921	ENSMUSG00000048874	Phf3	-	19
chr1	30803802	30803807	cluster:372	27	-	chr1	30802339	30873921	ENSMUSG00000048874	Phf3	-	5
chr1	30803838	30803858	cluster:373	31	-	chr1	30802339	30873921	ENSMUSG00000048874	Phf3	-	20
chr1	30803874	30803877	cluster:374	19	-	chr1	30802339	30873921	ENSMUSG00000048874	Phf3	-	3
chr1	30803932	30803941	cluster:375	14	-	chr1	30802339	30873921	ENSMUSG00000048874	Phf3	-	9
chr1	30804075	30804082	cluster:376	19	-	chr1	30802339	30873921	ENSMUSG00000048874	Phf3	-	7
chr1	30804154	30804158	cluster:377	18	-	chr1	30802339	30873921	ENSMUSG00000048874	Phf3	-	4
chr1	30804177	30804187	cluster:378	18	-	chr1	30802339	30873921	ENSMUSG00000048874	Phf3	-	10
chr1	30804225	30804236	cluster:379	12	-	chr1	30802339	30873921	ENSMUSG00000048874	Phf3	-	11
chr1	30804270	30804273	cluster:380	14	-	chr1	30802339	30873921	ENSMUSG00000048874	Phf3	-	3
chr1	30804292	30804311	cluster:381	43	-	chr1	30802339	30873921	ENSMUSG00000048874	Phf3	-	19
chr1	30804323	30804328	cluster:382	32	-	chr1	30802339	30873921	ENSMUSG00000048874	Phf3	-	5
chr1	30804343	30804350	cluster:383	33	-	chr1	30802339	30873921	ENSMUSG00000048874	Phf3	-	7
chr1	30804376	30804392	cluster:384	24	-	chr1	30802339	30873921	ENSMUSG00000048874	Phf3	-	16
chr1	30804405	30804407	cluster:385	20	-	chr1	30802339	30873921	ENSMUSG00000048874	Phf3	-	2
chr1	30804474	30804498	cluster:387	34	-	chr1	30802339	30873921	ENSMUSG00000048874	Phf3	-	24
chr1	30804533	30804544	cluster:388	24	-	chr1	30802339	30873921	ENSMUSG00000048874	Phf3	-	11
chr1	30804567	30804588	cluster:389	36	-	chr1	30802339	30873921	ENSMUSG00000048874	Phf3	-	21
chr1	30804631	30804645	cluster:390	22	-	chr1	30802339	30873921	ENSMUSG00000048874	Phf3	-	14
chr1	30804664	30804696	cluster:391	23	-	chr1	30802339	30873921	ENSMUSG00000048874	Phf3	-	32
chr1	30804727	30804742	cluster:392	60	-	chr1	30802339	30873921	ENSMUSG00000048874	Phf3	-	15
chr1	30804781	30804799	cluster:393	29	-	chr1	30802339	30873921	ENSMUSG00000048874	Phf3	-	18
chr1	30804985	30804987	cluster:394	18	-	chr1	30802339	30873921	ENSMUSG00000048874	Phf3	-	2
chr1	30805016	30805024	cluster:395	21	-	chr1	30802339	30873921	ENSMUSG00000048874	Phf3	-	8
chr1	30805036	30805038	cluster:396	22	-	chr1	30802339	30873921	ENSMUSG00000048874	Phf3	-	2
chr1	30805163	30805176	cluster:397	25	-	chr1	30802339	30873921	ENSMUSG00000048874	Phf3	-	13
chr1	30805210	30805216	cluster:398	32	-	chr1	30802339	30873921	ENSMUSG00000048874	Phf3	-	6
chr1	30805270	30805300	cluster:399	52	-	chr1	30802339	30873921	ENSMUSG00000048874	Phf3	-	30
chr1	30805313	30805317	cluster:400	20	-	chr1	30802339	30873921	ENSMUSG00000048874	Phf3	-	4
chr1	30805437	30805451	cluster:402	35	-	chr1	30802339	30873921	ENSMUSG00000048874	Phf3	-	14
chr1	30805553	30805568	cluster:403	15	-	chr1	30802339	30873921	ENSMUSG00000048874	Phf3	-	15
chr1	30805614	30805625	cluster:404	23	-	chr1	30802339	30873921	ENSMUSG00000048874	Phf3	-	11
chr1	30805727	30805750	cluster:405	43	-	chr1	30802339	30873921	ENSMUSG00000048874	Phf3	-	23
chr1	30805819	30805823	cluster:406	6	-	chr1	30802339	30873921	ENSMUSG00000048874	Phf3	-	4
chr1	30805896	30805902	cluster:407	15	-	chr1	30802339	30873921	ENSMUSG00000048874	Phf3	-	6
chr1	30806181	30806184	cluster:408	14	-	chr1	30802339	30873921	ENSMUSG00000048874	Phf3	-	3
chr1	30806284	30806292	cluster:409	9	-	chr1	30802339	30873921	ENSMUSG00000048874	Phf3	-	8
chr1	30806312	30806315	cluster:410	12	-	chr1	30802339	30873921	ENSMUSG00000048874	Phf3	-	3
chr1	30808775	30808791	cluster:411	44	-	chr1	30802339	30873921	ENSMUSG00000048874	Phf3	-	16
chr1	30809755	30809759	cluster:412	9	-	chr1	30802339	30873921	ENSMUSG00000048874	Phf3	-	4
chr1	30811840	30811843	cluster:413	15	-	chr1	30802339	30873921	ENSMUSG00000048874	Phf3	-	3
chr1	30811916	30811920	cluster:414	9	-	chr1	30802339	30873921	ENSMUSG00000048874	Phf3	-	4
chr1	30813068	30813073	cluster:415	14	-	chr1	30802339	30873921	ENSMUSG00000048874	Phf3	-	5
chr1	30813166	30813168	cluster:416	7	-	chr1	30802339	30873921	ENSMUSG00000048874	Phf3	-	2
chr1	30816567	30816585	cluster:418	20	-	chr1	30802339	30873921	ENSMUSG00000048874	Phf3	-	18
chr1	30820102	30820106	cluster:419	21	-	chr1	30802339	30873921	ENSMUSG00000048874	Phf3	-	4
chr1	30820152	30820179	cluster:420	56	-	chr1	30802339	30873921	ENSMUSG00000048874	Phf3	-	27
chr1	30821209	30821223	cluster:421	27	-	chr1	30802339	30873921	ENSMUSG00000048874	Phf3	-	14
chr1	30821246	30821252	cluster:422	14	-	chr1	30802339	30873921	ENSMUSG00000048874	Phf3	-	6
chr1	30824111	30824117	cluster:423	6	-	chr1	30802339	30873921	ENSMUSG00000048874	Phf3	-	6
chr1	30829773	30829775	cluster:424	28	-	chr1	30802339	30873921	ENSMUSG00000048874	Phf3	-	2
chr1	30829786	30829799	cluster:425	29	-	chr1	30802339	30873921	ENSMUSG00000048874	Phf3	-	13
chr1	30829889	30829892	cluster:426	9	-	chr1	30802339	30873921	ENSMUSG00000048874	Phf3	-	3
chr1	30829933	30829943	cluster:427	23	-	chr1	30802339	30873921	ENSMUSG00000048874	Phf3	-	10
chr1	30829969	30829972	cluster:428	9	-	chr1	30802339	30873921	ENSMUSG00000048874	Phf3	-	3
chr1	30829985	30829987	cluster:429	14	-	chr1	30802339	30873921	ENSMUSG00000048874	Phf3	-	2
chr1	30830081	30830090	cluster:431	9	-	chr1	30802339	30873921	ENSMUSG00000048874	Phf3	-	9
chr1	30830190	30830196	cluster:432	11	-	chr1	30802339	30873921	ENSMUSG00000048874	Phf3	-	6
chr1	30830239	30830244	cluster:433	14	-	chr1	30802339	30873921	ENSMUSG00000048874	Phf3	-	5
chr1	30830338	30830345	cluster:434	9	-	chr1	30802339	30873921	ENSMUSG00000048874	Phf3	-	7
chr1	30830543	30830563	cluster:435	28	-	chr1	30802339	30873921	ENSMUSG00000048874	Phf3	-	20
chr1	30830630	30830633	cluster:436	9	-	chr1	30802339	30873921	ENSMUSG00000048874	Phf3	-	3
chr1	30830669	30830689	cluster:437	52	-	chr1	30802339	30873921	ENSMUSG00000048874	Phf3	-	20
chr1	30830710	30830744	cluster:438	56	-	chr1	30802339	30873921	ENSMUSG00000048874	Phf3	-	34
chr1	30830770	30830773	cluster:439	20	-	chr1	30802339	30873921	ENSMUSG00000048874	Phf3	-	3
chr1	30830850	30830860	cluster:440	19	-	chr1	30802339	30873921	ENSMUSG00000048874	Phf3	-	10
chr1	30830875	30830885	cluster:441	19	-	chr1	30802339	30873921	ENSMUSG00000048874	Phf3	-	10
chr1	30830902	30830916	cluster:442	17	-	chr1	30802339	30873921	ENSMUSG00000048874	Phf3	-	14
chr1	30830947	30830954	cluster:443	20	-	chr1	30802339	30873921	ENSMUSG00000048874	Phf3	-	7
chr1	30830990	30830995	cluster:444	29	-	chr1	30802339	30873921	ENSMUSG00000048874	Phf3	-	5
chr1	30831103	30831106	cluster:445	18	-	chr1	30802339	30873921	ENSMUSG00000048874	Phf3	-	3
chr1	30831411	30831413	cluster:447	11	-	chr1	30802339	30873921	ENSMUSG00000048874	Phf3	-	2
chr1	30831485	30831489	cluster:448	13	-	chr1	30802339	30873921	ENSMUSG00000048874	Phf3	-	4
chr1	30831574	30831579	cluster:449	10	-	chr1	30802339	30873921	ENSMUSG00000048874	Phf3	-	5
chr1	30831982	30831984	cluster:450	20	-	chr1	30802339	30873921	ENSMUSG00000048874	Phf3	-	2
chr1	30837116	30837119	cluster:451	25	-	chr1	30802339	30873921	ENSMUSG00000048874	Phf3	-	3
chr1	30837139	30837160	cluster:452	15	-	chr1	30802339	30873921	ENSMUSG00000048874	Phf3	-	21
chr1	30837184	30837193	cluster:453	21	-	chr1	30802339	30873921	ENSMUSG00000048874	Phf3	-	9
chr1	30837221	30837230	cluster:454	15	-	chr1	30802339	30873921	ENSMUSG00000048874	Phf3	-	9
chr1	30863109	30863135	cluster:456	35	-	chr1	30802339	30873921	ENSMUSG00000048874	Phf3	-	26
chr1	30863223	30863247	cluster:457	22	-	chr1	30802339	30873921	ENSMUSG00000048874	Phf3	-	24
chr1	30873588	30873590	cluster:458	11	-	chr1	30802339	30873921	ENSMUSG00000048874	Phf3	-	2
chr1	30943333	30943336	cluster:459	11	-	chr1	30940302	30949770	ENSMUSG00000026064	Ptp4a1	-	3
chr1	30943426	30943432	cluster:460	7	-	chr1	30940302	30949770	ENSMUSG00000026064	Ptp4a1	-	6
chr1	30943475	30943477	cluster:461	7	-	chr1	30940302	30949770	ENSMUSG00000026064	Ptp4a1	-	2
chr1	30943566	30943570	cluster:462	9	-	chr1	30940302	30949770	ENSMUSG00000026064	Ptp4a1	-	4
chr1	30943601	30943611	cluster:463	19	-	chr1	30940302	30949770	ENSMUSG00000026064	Ptp4a1	-	10
chr1	30945166	30945174	cluster:464	6	-	chr1	30940302	30949770	ENSMUSG00000026064	Ptp4a1	-	8
chr1	30945682	30945690	cluster:465	10	-	chr1	30940302	30949770	ENSMUSG00000026064	Ptp4a1	-	8
chr1	30946646	30946658	cluster:467	16	-	chr1	30940302	30949770	ENSMUSG00000026064	Ptp4a1	-	12
chr1	30946795	30946803	cluster:468	9	-	chr1	30940302	30949770	ENSMUSG00000026064	Ptp4a1	-	8
chr1	30946971	30946974	cluster:469	10	-	chr1	30940302	30949770	ENSMUSG00000026064	Ptp4a1	-	3
chr1	30947134	30947140	cluster:470	16	-	chr1	30940302	30949770	ENSMUSG00000026064	Ptp4a1	-	6
chr1	30947241	30947247	cluster:471	13	-	chr1	30940302	30949770	ENSMUSG00000026064	Ptp4a1	-	6
chr1	30947673	30947682	cluster:472	14	-	chr1	30940302	30949770	ENSMUSG00000026064	Ptp4a1	-	9
chr1	30948205	30948218	cluster:473	8	-	chr1	30940302	30949770	ENSMUSG00000026064	Ptp4a1	-	13
chr1	30948673	30948678	cluster:474	18	-	chr1	30940302	30949770	ENSMUSG00000026064	Ptp4a1	-	5
chr1	30948925	30948931	cluster:475	9	-	chr1	30940302	30949770	ENSMUSG00000026064	Ptp4a1	-	6
chr1	33628447	33628449	cluster:477	8	-	chr1	33453810	33669795	ENSMUSG00000026134	Prim2	-	2
chr1	33668929	33668931	cluster:478	6	-	chr1	33453810	33669795	ENSMUSG00000026134	Prim2	-	2
chr1	33669921	33669929	cluster:479	14	+	chr1	33669824	33670712	ENSMUSG00000103746	1700001G17Rik	+	8
chr1	33720431	33720436	cluster:480	6	+	chr1	33719887	33742564	ENSMUSG00000004768	Rab23	+	5
chr1	33723882	33723922	cluster:482	36	+	chr1	33719887	33742564	ENSMUSG00000004768	Rab23	+	40
chr1	33723945	33723950	cluster:483	42	+	chr1	33719887	33742564	ENSMUSG00000004768	Rab23	+	5
chr1	33723961	33723975	cluster:484	42	+	chr1	33719887	33742564	ENSMUSG00000004768	Rab23	+	14
chr1	33723986	33723996	cluster:485	41	+	chr1	33719887	33742564	ENSMUSG00000004768	Rab23	+	10
chr1	33724593	33724595	cluster:486	12	+	chr1	33719887	33742564	ENSMUSG00000004768	Rab23	+	2
chr1	33724965	33724970	cluster:487	10	+	chr1	33719887	33742564	ENSMUSG00000004768	Rab23	+	5
chr1	33738290	33738294	cluster:488	11	+	chr1	33719887	33742564	ENSMUSG00000004768	Rab23	+	4
chr1	33739293	33739297	cluster:489	7	+	chr1	33719887	33742564	ENSMUSG00000004768	Rab23	+	4
chr1	33739394	33739398	cluster:490	16	+	chr1	33719887	33742564	ENSMUSG00000004768	Rab23	+	4
chr1	33739583	33739587	cluster:492	8	+	chr1	33719887	33742564	ENSMUSG00000004768	Rab23	+	4
chr1	33739816	33739820	cluster:493	11	+	chr1	33719887	33742564	ENSMUSG00000004768	Rab23	+	4
chr1	33740379	33740381	cluster:494	10	+	chr1	33719887	33742564	ENSMUSG00000004768	Rab23	+	2
chr1	33761609	33761613	cluster:495	9	-	chr1	33761545	33814595	ENSMUSG00000042197	Zfp451	-	4
chr1	33762096	33762105	cluster:496	8	-	chr1	33761545	33814595	ENSMUSG00000042197	Zfp451	-	9
chr1	33762188	33762200	cluster:498	17	-	chr1	33761545	33814595	ENSMUSG00000042197	Zfp451	-	12
chr1	33769747	33769749	cluster:499	13	-	chr1	33761545	33814595	ENSMUSG00000042197	Zfp451	-	2
chr1	33769817	33769821	cluster:500	11	-	chr1	33761545	33814595	ENSMUSG00000042197	Zfp451	-	4
chr1	33770778	33770785	cluster:501	11	-	chr1	33761545	33814595	ENSMUSG00000042197	Zfp451	-	7
chr1	33771525	33771527	cluster:502	11	-	chr1	33761545	33814595	ENSMUSG00000042197	Zfp451	-	2
chr1	33772906	33772908	cluster:503	13	-	chr1	33761545	33814595	ENSMUSG00000042197	Zfp451	-	2
chr1	33772942	33772948	cluster:504	7	-	chr1	33761545	33814595	ENSMUSG00000042197	Zfp451	-	6
chr1	33776717	33776719	cluster:505	16	-	chr1	33761545	33814595	ENSMUSG00000042197	Zfp451	-	2
chr1	33776787	33776795	cluster:506	25	-	chr1	33761545	33814595	ENSMUSG00000042197	Zfp451	-	8
chr1	33776815	33776823	cluster:507	25	-	chr1	33761545	33814595	ENSMUSG00000042197	Zfp451	-	8
chr1	33776845	33776847	cluster:508	8	-	chr1	33761545	33814595	ENSMUSG00000042197	Zfp451	-	2
chr1	33777199	33777202	cluster:509	6	-	chr1	33761545	33814595	ENSMUSG00000042197	Zfp451	-	3
chr1	33777288	33777293	cluster:510	23	-	chr1	33761545	33814595	ENSMUSG00000042197	Zfp451	-	5
chr1	33777333	33777336	cluster:511	17	-	chr1	33761545	33814595	ENSMUSG00000042197	Zfp451	-	3
chr1	33777407	33777411	cluster:512	10	-	chr1	33761545	33814595	ENSMUSG00000042197	Zfp451	-	4
chr1	33777551	33777554	cluster:513	17	-	chr1	33761545	33814595	ENSMUSG00000042197	Zfp451	-	3
chr1	33777567	33777579	cluster:514	18	-	chr1	33761545	33814595	ENSMUSG00000042197	Zfp451	-	12
chr1	33777620	33777630	cluster:515	22	-	chr1	33761545	33814595	ENSMUSG00000042197	Zfp451	-	10
chr1	33777752	33777756	cluster:517	30	-	chr1	33761545	33814595	ENSMUSG00000042197	Zfp451	-	4
chr1	33777772	33777778	cluster:518	34	-	chr1	33761545	33814595	ENSMUSG00000042197	Zfp451	-	6
chr1	33779968	33779971	cluster:519	6	-	chr1	33761545	33814595	ENSMUSG00000042197	Zfp451	-	3
chr1	33782157	33782167	cluster:520	20	-	chr1	33761545	33814595	ENSMUSG00000042197	Zfp451	-	10
chr1	33782195	33782199	cluster:521	9	-	chr1	33761545	33814595	ENSMUSG00000042197	Zfp451	-	4
chr1	33783103	33783110	cluster:522	17	-	chr1	33761545	33814595	ENSMUSG00000042197	Zfp451	-	7
chr1	33783949	33783951	cluster:523	6	-	chr1	33761545	33814595	ENSMUSG00000042197	Zfp451	-	2
chr1	33786520	33786522	cluster:524	12	-	chr1	33761545	33814595	ENSMUSG00000042197	Zfp451	-	2
chr1	33800190	33800193	cluster:525	8	-	chr1	33761545	33814595	ENSMUSG00000042197	Zfp451	-	3
chr1	33800763	33800770	cluster:526	10	-	chr1	33761545	33814595	ENSMUSG00000042197	Zfp451	-	7
chr1	33800941	33800956	cluster:527	21	-	chr1	33761545	33814595	ENSMUSG00000042197	Zfp451	-	15
chr1	33801046	33801054	cluster:528	11	-	chr1	33761545	33814595	ENSMUSG00000042197	Zfp451	-	8
chr1	33801110	33801112	cluster:529	8	-	chr1	33761545	33814595	ENSMUSG00000042197	Zfp451	-	2
chr1	33801411	33801421	cluster:530	12	-	chr1	33761545	33814595	ENSMUSG00000042197	Zfp451	-	10
chr1	33801639	33801641	cluster:531	11	-	chr1	33761545	33814595	ENSMUSG00000042197	Zfp451	-	2
chr1	33801783	33801790	cluster:532	19	-	chr1	33761545	33814595	ENSMUSG00000042197	Zfp451	-	7
chr1	33801941	33801952	cluster:534	19	-	chr1	33761545	33814595	ENSMUSG00000042197	Zfp451	-	11
chr1	33802004	33802012	cluster:536	17	-	chr1	33761545	33814595	ENSMUSG00000042197	Zfp451	-	8
chr1	33802063	33802087	cluster:537	28	-	chr1	33761545	33814595	ENSMUSG00000042197	Zfp451	-	24
chr1	33802252	33802257	cluster:538	9	-	chr1	33761545	33814595	ENSMUSG00000042197	Zfp451	-	5
chr1	33802344	33802378	cluster:539	32	-	chr1	33761545	33814595	ENSMUSG00000042197	Zfp451	-	34
chr1	33802558	33802560	cluster:540	13	-	chr1	33761545	33814595	ENSMUSG00000042197	Zfp451	-	2
chr1	33802742	33802761	cluster:541	22	-	chr1	33761545	33814595	ENSMUSG00000042197	Zfp451	-	19
chr1	33802868	33802875	cluster:542	20	-	chr1	33761545	33814595	ENSMUSG00000042197	Zfp451	-	7
chr1	33802897	33802901	cluster:543	23	-	chr1	33761545	33814595	ENSMUSG00000042197	Zfp451	-	4
chr1	33802991	33802993	cluster:544	23	-	chr1	33761545	33814595	ENSMUSG00000042197	Zfp451	-	2
chr1	33803024	33803032	cluster:545	22	-	chr1	33761545	33814595	ENSMUSG00000042197	Zfp451	-	8
chr1	33803105	33803114	cluster:546	23	-	chr1	33761545	33814595	ENSMUSG00000042197	Zfp451	-	9
chr1	33803147	33803154	cluster:547	14	-	chr1	33761545	33814595	ENSMUSG00000042197	Zfp451	-	7
chr1	33803215	33803226	cluster:548	18	-	chr1	33761545	33814595	ENSMUSG00000042197	Zfp451	-	11
chr1	33803249	33803255	cluster:549	30	-	chr1	33761545	33814595	ENSMUSG00000042197	Zfp451	-	6
chr1	33803302	33803304	cluster:550	20	-	chr1	33761545	33814595	ENSMUSG00000042197	Zfp451	-	2
chr1	33803322	33803327	cluster:551	16	-	chr1	33761545	33814595	ENSMUSG00000042197	Zfp451	-	5
chr1	33803343	33803356	cluster:552	13	-	chr1	33761545	33814595	ENSMUSG00000042197	Zfp451	-	13
chr1	33803468	33803479	cluster:553	23	-	chr1	33761545	33814595	ENSMUSG00000042197	Zfp451	-	11
chr1	33803622	33803639	cluster:554	15	-	chr1	33761545	33814595	ENSMUSG00000042197	Zfp451	-	17
chr1	33803701	33803709	cluster:555	13	-	chr1	33761545	33814595	ENSMUSG00000042197	Zfp451	-	8
chr1	33803752	33803761	cluster:556	17	-	chr1	33761545	33814595	ENSMUSG00000042197	Zfp451	-	9
chr1	33803773	33803776	cluster:557	21	-	chr1	33761545	33814595	ENSMUSG00000042197	Zfp451	-	3
chr1	33805388	33805410	cluster:558	21	-	chr1	33761545	33814595	ENSMUSG00000042197	Zfp451	-	22
chr1	33813731	33813740	cluster:559	18	-	chr1	33761545	33814595	ENSMUSG00000042197	Zfp451	-	9
chr1	33908273	33908294	cluster:562	54	+	chr1	33908225	34308661	ENSMUSG00000026131	Dst	+	21
chr1	33908307	33908315	cluster:563	15	+	chr1	33908225	34308661	ENSMUSG00000026131	Dst	+	8
chr1	33908329	33908339	cluster:564	23	+	chr1	33908225	34308661	ENSMUSG00000026131	Dst	+	10
chr1	33908370	33908373	cluster:565	22	+	chr1	33908225	34308661	ENSMUSG00000026131	Dst	+	3
chr1	33908425	33908444	cluster:566	30	+	chr1	33908225	34308661	ENSMUSG00000026131	Dst	+	19
chr1	33908555	33908557	cluster:567	12	+	chr1	33908225	34308661	ENSMUSG00000026131	Dst	+	2
chr1	33911565	33911577	cluster:569	14	+	chr1	33908225	34308661	ENSMUSG00000026131	Dst	+	12
chr1	34005969	34005977	cluster:572	20	+	chr1	33908225	34308661	ENSMUSG00000026131	Dst	+	8
chr1	34006230	34006240	cluster:573	36	+	chr1	33908225	34308661	ENSMUSG00000026131	Dst	+	10
chr1	34006343	34006348	cluster:574	7	+	chr1	33908225	34308661	ENSMUSG00000026131	Dst	+	5
chr1	34006757	34006763	cluster:575	11	+	chr1	33908225	34308661	ENSMUSG00000026131	Dst	+	6
chr1	34006864	34006868	cluster:576	10	+	chr1	33908225	34308661	ENSMUSG00000026131	Dst	+	4
chr1	34013837	34013844	cluster:578	12	+	chr1	33908225	34308661	ENSMUSG00000026131	Dst	+	7
chr1	34086271	34086293	cluster:579	25	+	chr1	33908225	34308661	ENSMUSG00000026131	Dst	+	22
chr1	34113978	34113982	cluster:580	10	+	chr1	33908225	34308661	ENSMUSG00000026131	Dst	+	4
chr1	34114005	34114008	cluster:581	15	+	chr1	33908225	34308661	ENSMUSG00000026131	Dst	+	3
chr1	34114135	34114138	cluster:582	9	+	chr1	33908225	34308661	ENSMUSG00000026131	Dst	+	3
chr1	34116178	34116188	cluster:584	23	+	chr1	33908225	34308661	ENSMUSG00000026131	Dst	+	10
chr1	34116268	34116270	cluster:585	8	+	chr1	33908225	34308661	ENSMUSG00000026131	Dst	+	2
chr1	34117498	34117516	cluster:586	28	+	chr1	33908225	34308661	ENSMUSG00000026131	Dst	+	18
chr1	34122146	34122155	cluster:589	16	+	chr1	33908225	34308661	ENSMUSG00000026131	Dst	+	9
chr1	34135201	34135205	cluster:590	11	+	chr1	33908225	34308661	ENSMUSG00000026131	Dst	+	4
chr1	34135829	34135844	cluster:592	21	+	chr1	33908225	34308661	ENSMUSG00000026131	Dst	+	15
chr1	34152222	34152233	cluster:593	10	+	chr1	33908225	34308661	ENSMUSG00000026131	Dst	+	11
chr1	34152267	34152269	cluster:595	17	+	chr1	33908225	34308661	ENSMUSG00000026131	Dst	+	2
chr1	34156605	34156627	cluster:596	22	+	chr1	33908225	34308661	ENSMUSG00000026131	Dst	+	22
chr1	34156682	34156690	cluster:597	12	+	chr1	33908225	34308661	ENSMUSG00000026131	Dst	+	8
chr1	34156811	34156820	cluster:598	20	+	chr1	33908225	34308661	ENSMUSG00000026131	Dst	+	9
chr1	34159531	34159537	cluster:599	11	+	chr1	33908225	34308661	ENSMUSG00000026131	Dst	+	6
chr1	34161076	34161086	cluster:600	36	+	chr1	33908225	34308661	ENSMUSG00000026131	Dst	+	10
chr1	34161101	34161107	cluster:601	18	+	chr1	33908225	34308661	ENSMUSG00000026131	Dst	+	6
chr1	34163051	34163080	cluster:602	62	+	chr1	33908225	34308661	ENSMUSG00000026131	Dst	+	29
chr1	34163095	34163115	cluster:603	57	+	chr1	33908225	34308661	ENSMUSG00000026131	Dst	+	20
chr1	34163554	34163563	cluster:604	14	+	chr1	33908225	34308661	ENSMUSG00000026131	Dst	+	9
chr1	34164076	34164084	cluster:605	16	+	chr1	33908225	34308661	ENSMUSG00000026131	Dst	+	8
chr1	34164184	34164188	cluster:606	13	+	chr1	33908225	34308661	ENSMUSG00000026131	Dst	+	4
chr1	34165144	34165147	cluster:607	17	+	chr1	33908225	34308661	ENSMUSG00000026131	Dst	+	3
chr1	34167402	34167408	cluster:610	7	+	chr1	33908225	34308661	ENSMUSG00000026131	Dst	+	6
chr1	34167935	34167943	cluster:611	16	+	chr1	33908225	34308661	ENSMUSG00000026131	Dst	+	8
chr1	34167964	34167976	cluster:612	24	+	chr1	33908225	34308661	ENSMUSG00000026131	Dst	+	12
chr1	34169187	34169198	cluster:613	22	+	chr1	33908225	34308661	ENSMUSG00000026131	Dst	+	11
chr1	34169257	34169259	cluster:614	10	+	chr1	33908225	34308661	ENSMUSG00000026131	Dst	+	2
chr1	34169285	34169287	cluster:615	13	+	chr1	33908225	34308661	ENSMUSG00000026131	Dst	+	2
chr1	34169768	34169785	cluster:616	12	+	chr1	33908225	34308661	ENSMUSG00000026131	Dst	+	17
chr1	34169896	34169918	cluster:617	36	+	chr1	33908225	34308661	ENSMUSG00000026131	Dst	+	22
chr1	34170114	34170120	cluster:618	12	+	chr1	33908225	34308661	ENSMUSG00000026131	Dst	+	6
chr1	34170299	34170309	cluster:620	15	+	chr1	33908225	34308661	ENSMUSG00000026131	Dst	+	10
chr1	34170375	34170379	cluster:621	13	+	chr1	33908225	34308661	ENSMUSG00000026131	Dst	+	4
chr1	34170409	34170421	cluster:622	21	+	chr1	33908225	34308661	ENSMUSG00000026131	Dst	+	12
chr1	34170488	34170493	cluster:624	32	+	chr1	33908225	34308661	ENSMUSG00000026131	Dst	+	5
chr1	34171191	34171213	cluster:626	34	+	chr1	33908225	34308661	ENSMUSG00000026131	Dst	+	22
chr1	34171292	34171299	cluster:627	12	+	chr1	33908225	34308661	ENSMUSG00000026131	Dst	+	7
chr1	34172192	34172196	cluster:628	11	+	chr1	33908225	34308661	ENSMUSG00000026131	Dst	+	4
chr1	34172221	34172223	cluster:629	23	+	chr1	33908225	34308661	ENSMUSG00000026131	Dst	+	2
chr1	34172241	34172275	cluster:630	32	+	chr1	33908225	34308661	ENSMUSG00000026131	Dst	+	34
chr1	34172329	34172334	cluster:631	13	+	chr1	33908225	34308661	ENSMUSG00000026131	Dst	+	5
chr1	34172706	34172717	cluster:632	7	+	chr1	33908225	34308661	ENSMUSG00000026131	Dst	+	11
chr1	34173017	34173029	cluster:633	23	+	chr1	33908225	34308661	ENSMUSG00000026131	Dst	+	12
chr1	34173055	34173068	cluster:634	37	+	chr1	33908225	34308661	ENSMUSG00000026131	Dst	+	13
chr1	34174114	34174118	cluster:635	8	+	chr1	33908225	34308661	ENSMUSG00000026131	Dst	+	4
chr1	34174212	34174217	cluster:636	14	+	chr1	33908225	34308661	ENSMUSG00000026131	Dst	+	5
chr1	34174696	34174725	cluster:637	34	+	chr1	33908225	34308661	ENSMUSG00000026131	Dst	+	29
chr1	34174736	34174738	cluster:638	34	+	chr1	33908225	34308661	ENSMUSG00000026131	Dst	+	2
chr1	34174749	34174751	cluster:639	21	+	chr1	33908225	34308661	ENSMUSG00000026131	Dst	+	2
chr1	34174765	34174768	cluster:640	9	+	chr1	33908225	34308661	ENSMUSG00000026131	Dst	+	3
chr1	34174783	34174786	cluster:641	16	+	chr1	33908225	34308661	ENSMUSG00000026131	Dst	+	3
chr1	34175453	34175461	cluster:642	13	+	chr1	33908225	34308661	ENSMUSG00000026131	Dst	+	8
chr1	34176203	34176206	cluster:644	16	+	chr1	33908225	34308661	ENSMUSG00000026131	Dst	+	3
chr1	34176870	34176873	cluster:645	10	+	chr1	33908225	34308661	ENSMUSG00000026131	Dst	+	3
chr1	34176957	34176964	cluster:646	15	+	chr1	33908225	34308661	ENSMUSG00000026131	Dst	+	7
chr1	34177080	34177086	cluster:647	15	+	chr1	33908225	34308661	ENSMUSG00000026131	Dst	+	6
chr1	34177312	34177322	cluster:648	11	+	chr1	33908225	34308661	ENSMUSG00000026131	Dst	+	10
chr1	34177339	34177341	cluster:649	12	+	chr1	33908225	34308661	ENSMUSG00000026131	Dst	+	2
chr1	34177482	34177499	cluster:650	33	+	chr1	33908225	34308661	ENSMUSG00000026131	Dst	+	17
chr1	34177531	34177534	cluster:651	17	+	chr1	33908225	34308661	ENSMUSG00000026131	Dst	+	3
chr1	34177630	34177632	cluster:652	29	+	chr1	33908225	34308661	ENSMUSG00000026131	Dst	+	2
chr1	34177651	34177659	cluster:653	26	+	chr1	33908225	34308661	ENSMUSG00000026131	Dst	+	8
chr1	34177695	34177706	cluster:654	25	+	chr1	33908225	34308661	ENSMUSG00000026131	Dst	+	11
chr1	34177778	34177780	cluster:655	26	+	chr1	33908225	34308661	ENSMUSG00000026131	Dst	+	2
chr1	34177880	34177894	cluster:656	22	+	chr1	33908225	34308661	ENSMUSG00000026131	Dst	+	14
chr1	34177930	34177932	cluster:657	10	-	chr1	34165856	34178446	ENSMUSG00000096992	Gm26788	-	2
chr1	34177966	34177969	cluster:658	18	+	chr1	33908225	34308661	ENSMUSG00000026131	Dst	+	3
chr1	34178459	34178463	cluster:659	16	+	chr1	33908225	34308661	ENSMUSG00000026131	Dst	+	4
chr1	34178952	34178954	cluster:661	15	+	chr1	33908225	34308661	ENSMUSG00000026131	Dst	+	2
chr1	34179034	34179051	cluster:662	37	+	chr1	33908225	34308661	ENSMUSG00000026131	Dst	+	17
chr1	34179080	34179085	cluster:663	22	+	chr1	33908225	34308661	ENSMUSG00000026131	Dst	+	5
chr1	34179175	34179189	cluster:664	14	+	chr1	33908225	34308661	ENSMUSG00000026131	Dst	+	14
chr1	34179232	34179238	cluster:665	14	+	chr1	33908225	34308661	ENSMUSG00000026131	Dst	+	6
chr1	34179312	34179324	cluster:666	22	+	chr1	33908225	34308661	ENSMUSG00000026131	Dst	+	12
chr1	34179376	34179394	cluster:667	23	+	chr1	33908225	34308661	ENSMUSG00000026131	Dst	+	18
chr1	34179682	34179689	cluster:668	11	+	chr1	33908225	34308661	ENSMUSG00000026131	Dst	+	7
chr1	34179951	34179961	cluster:669	24	+	chr1	33908225	34308661	ENSMUSG00000026131	Dst	+	10
chr1	34180060	34180064	cluster:670	12	+	chr1	33908225	34308661	ENSMUSG00000026131	Dst	+	4
chr1	34180307	34180331	cluster:671	34	+	chr1	33908225	34308661	ENSMUSG00000026131	Dst	+	24
chr1	34180353	34180364	cluster:672	11	+	chr1	33908225	34308661	ENSMUSG00000026131	Dst	+	11
chr1	34180485	34180493	cluster:674	24	+	chr1	33908225	34308661	ENSMUSG00000026131	Dst	+	8
chr1	34180552	34180576	cluster:675	51	+	chr1	33908225	34308661	ENSMUSG00000026131	Dst	+	24
chr1	34180591	34180609	cluster:676	45	+	chr1	33908225	34308661	ENSMUSG00000026131	Dst	+	18
chr1	34180675	34180697	cluster:678	23	+	chr1	33908225	34308661	ENSMUSG00000026131	Dst	+	22
chr1	34180731	34180759	cluster:679	30	+	chr1	33908225	34308661	ENSMUSG00000026131	Dst	+	28
chr1	34180772	34180780	cluster:680	32	+	chr1	33908225	34308661	ENSMUSG00000026131	Dst	+	8
chr1	34180967	34180974	cluster:681	15	+	chr1	33908225	34308661	ENSMUSG00000026131	Dst	+	7
chr1	34181059	34181065	cluster:682	13	+	chr1	33908225	34308661	ENSMUSG00000026131	Dst	+	6
chr1	34181477	34181482	cluster:684	6	+	chr1	33908225	34308661	ENSMUSG00000026131	Dst	+	5
chr1	34181509	34181514	cluster:685	18	+	chr1	33908225	34308661	ENSMUSG00000026131	Dst	+	5
chr1	34181591	34181595	cluster:686	16	+	chr1	33908225	34308661	ENSMUSG00000026131	Dst	+	4
chr1	34181726	34181739	cluster:687	16	+	chr1	33908225	34308661	ENSMUSG00000026131	Dst	+	13
chr1	34181757	34181772	cluster:688	20	+	chr1	33908225	34308661	ENSMUSG00000026131	Dst	+	15
chr1	34181937	34181939	cluster:689	14	+	chr1	33908225	34308661	ENSMUSG00000026131	Dst	+	2
chr1	34182826	34182845	cluster:690	19	+	chr1	33908225	34308661	ENSMUSG00000026131	Dst	+	19
chr1	34183149	34183153	cluster:691	15	+	chr1	33908225	34308661	ENSMUSG00000026131	Dst	+	4
chr1	34183344	34183357	cluster:692	13	+	chr1	33908225	34308661	ENSMUSG00000026131	Dst	+	13
chr1	34183379	34183384	cluster:693	14	+	chr1	33908225	34308661	ENSMUSG00000026131	Dst	+	5
chr1	34183542	34183549	cluster:694	19	+	chr1	33908225	34308661	ENSMUSG00000026131	Dst	+	7
chr1	34183609	34183617	cluster:695	12	+	chr1	33908225	34308661	ENSMUSG00000026131	Dst	+	8
chr1	34183801	34183803	cluster:696	14	+	chr1	33908225	34308661	ENSMUSG00000026131	Dst	+	2
chr1	34183983	34184025	cluster:697	47	+	chr1	33908225	34308661	ENSMUSG00000026131	Dst	+	42
chr1	34184044	34184046	cluster:698	36	+	chr1	33908225	34308661	ENSMUSG00000026131	Dst	+	2
chr1	34184124	34184136	cluster:699	20	+	chr1	33908225	34308661	ENSMUSG00000026131	Dst	+	12
chr1	34185858	34185869	cluster:700	11	+	chr1	33908225	34308661	ENSMUSG00000026131	Dst	+	11
chr1	34185975	34186038	cluster:701	86	+	chr1	33908225	34308661	ENSMUSG00000026131	Dst	+	63
chr1	34186564	34186572	cluster:702	8	+	chr1	33908225	34308661	ENSMUSG00000026131	Dst	+	8
chr1	34186835	34186858	cluster:703	81	+	chr1	33908225	34308661	ENSMUSG00000026131	Dst	+	23
chr1	34186880	34186896	cluster:704	87	+	chr1	33908225	34308661	ENSMUSG00000026131	Dst	+	16
chr1	34186916	34186919	cluster:705	43	+	chr1	33908225	34308661	ENSMUSG00000026131	Dst	+	3
chr1	34187013	34187016	cluster:706	10	+	chr1	33908225	34308661	ENSMUSG00000026131	Dst	+	3
chr1	34187162	34187167	cluster:707	9	+	chr1	33908225	34308661	ENSMUSG00000026131	Dst	+	5
chr1	34187665	34187667	cluster:708	15	+	chr1	33908225	34308661	ENSMUSG00000026131	Dst	+	2
chr1	34187933	34187939	cluster:709	18	+	chr1	33908225	34308661	ENSMUSG00000026131	Dst	+	6
chr1	34187958	34187960	cluster:710	23	+	chr1	33908225	34308661	ENSMUSG00000026131	Dst	+	2
chr1	34188038	34188064	cluster:711	78	+	chr1	33908225	34308661	ENSMUSG00000026131	Dst	+	26
chr1	34188075	34188079	cluster:712	42	+	chr1	33908225	34308661	ENSMUSG00000026131	Dst	+	4
chr1	34188101	34188135	cluster:713	58	+	chr1	33908225	34308661	ENSMUSG00000026131	Dst	+	34
chr1	34188166	34188192	cluster:714	37	+	chr1	33908225	34308661	ENSMUSG00000026131	Dst	+	26
chr1	34188220	34188258	cluster:715	58	+	chr1	33908225	34308661	ENSMUSG00000026131	Dst	+	38
chr1	34188309	34188313	cluster:716	9	+	chr1	33908225	34308661	ENSMUSG00000026131	Dst	+	4
chr1	34188337	34188418	cluster:717	118	+	chr1	33908225	34308661	ENSMUSG00000026131	Dst	+	81
chr1	34188433	34188452	cluster:718	50	+	chr1	33908225	34308661	ENSMUSG00000026131	Dst	+	19
chr1	34188474	34188479	cluster:719	56	+	chr1	33908225	34308661	ENSMUSG00000026131	Dst	+	5
chr1	34188503	34188506	cluster:720	60	+	chr1	33908225	34308661	ENSMUSG00000026131	Dst	+	3
chr1	34188522	34188543	cluster:721	77	+	chr1	33908225	34308661	ENSMUSG00000026131	Dst	+	21
chr1	34188586	34188593	cluster:722	23	+	chr1	33908225	34308661	ENSMUSG00000026131	Dst	+	7
chr1	34188638	34188652	cluster:723	35	+	chr1	33908225	34308661	ENSMUSG00000026131	Dst	+	14
chr1	34188663	34188665	cluster:724	34	+	chr1	33908225	34308661	ENSMUSG00000026131	Dst	+	2
chr1	34188727	34188737	cluster:725	10	+	chr1	33908225	34308661	ENSMUSG00000026131	Dst	+	10
chr1	34188892	34188906	cluster:727	85	+	chr1	33908225	34308661	ENSMUSG00000026131	Dst	+	14
chr1	34188926	34188948	cluster:728	99	+	chr1	33908225	34308661	ENSMUSG00000026131	Dst	+	22
chr1	34188963	34188973	cluster:729	87	+	chr1	33908225	34308661	ENSMUSG00000026131	Dst	+	10
chr1	34189006	34189060	cluster:730	95	+	chr1	33908225	34308661	ENSMUSG00000026131	Dst	+	54
chr1	34189092	34189111	cluster:731	63	+	chr1	33908225	34308661	ENSMUSG00000026131	Dst	+	19
chr1	34189213	34189218	cluster:732	46	+	chr1	33908225	34308661	ENSMUSG00000026131	Dst	+	5
chr1	34189242	34189257	cluster:733	49	+	chr1	33908225	34308661	ENSMUSG00000026131	Dst	+	15
chr1	34189271	34189278	cluster:734	16	+	chr1	33908225	34308661	ENSMUSG00000026131	Dst	+	7
chr1	34189298	34189303	cluster:735	38	+	chr1	33908225	34308661	ENSMUSG00000026131	Dst	+	5
chr1	34189317	34189327	cluster:736	32	+	chr1	33908225	34308661	ENSMUSG00000026131	Dst	+	10
chr1	34189466	34189479	cluster:737	34	+	chr1	33908225	34308661	ENSMUSG00000026131	Dst	+	13
chr1	34189535	34189544	cluster:738	24	+	chr1	33908225	34308661	ENSMUSG00000026131	Dst	+	9
chr1	34189564	34189566	cluster:739	27	+	chr1	33908225	34308661	ENSMUSG00000026131	Dst	+	2
chr1	34189604	34189626	cluster:740	30	+	chr1	33908225	34308661	ENSMUSG00000026131	Dst	+	22
chr1	34189652	34189666	cluster:741	23	+	chr1	33908225	34308661	ENSMUSG00000026131	Dst	+	14
chr1	34189685	34189698	cluster:742	40	+	chr1	33908225	34308661	ENSMUSG00000026131	Dst	+	13
chr1	34189761	34189772	cluster:743	37	+	chr1	33908225	34308661	ENSMUSG00000026131	Dst	+	11
chr1	34189816	34189820	cluster:744	12	+	chr1	33908225	34308661	ENSMUSG00000026131	Dst	+	4
chr1	34189838	34189851	cluster:745	34	+	chr1	33908225	34308661	ENSMUSG00000026131	Dst	+	13
chr1	34189863	34189878	cluster:746	40	+	chr1	33908225	34308661	ENSMUSG00000026131	Dst	+	15
chr1	34189899	34189907	cluster:747	22	+	chr1	33908225	34308661	ENSMUSG00000026131	Dst	+	8
chr1	34189923	34189933	cluster:748	25	+	chr1	33908225	34308661	ENSMUSG00000026131	Dst	+	10
chr1	34189963	34189968	cluster:749	35	+	chr1	33908225	34308661	ENSMUSG00000026131	Dst	+	5
chr1	34189979	34189999	cluster:750	44	+	chr1	33908225	34308661	ENSMUSG00000026131	Dst	+	20
chr1	34190023	34190028	cluster:751	20	+	chr1	33908225	34308661	ENSMUSG00000026131	Dst	+	5
chr1	34190067	34190076	cluster:752	10	+	chr1	33908225	34308661	ENSMUSG00000026131	Dst	+	9
chr1	34190096	34190098	cluster:753	16	+	chr1	33908225	34308661	ENSMUSG00000026131	Dst	+	2
chr1	34190167	34190181	cluster:754	28	+	chr1	33908225	34308661	ENSMUSG00000026131	Dst	+	14
chr1	34190194	34190205	cluster:755	21	+	chr1	33908225	34308661	ENSMUSG00000026131	Dst	+	11
chr1	34190218	34190225	cluster:756	11	+	chr1	33908225	34308661	ENSMUSG00000026131	Dst	+	7
chr1	34190289	34190307	cluster:757	47	+	chr1	33908225	34308661	ENSMUSG00000026131	Dst	+	18
chr1	34190343	34190346	cluster:758	14	+	chr1	33908225	34308661	ENSMUSG00000026131	Dst	+	3
chr1	34190366	34190378	cluster:759	18	+	chr1	33908225	34308661	ENSMUSG00000026131	Dst	+	12
chr1	34190457	34190461	cluster:760	17	+	chr1	33908225	34308661	ENSMUSG00000026131	Dst	+	4
chr1	34190500	34190529	cluster:761	37	+	chr1	33908225	34308661	ENSMUSG00000026131	Dst	+	29
chr1	34190599	34190603	cluster:763	10	+	chr1	33908225	34308661	ENSMUSG00000026131	Dst	+	4
chr1	34190635	34190641	cluster:764	11	+	chr1	33908225	34308661	ENSMUSG00000026131	Dst	+	6
chr1	34190704	34190712	cluster:765	13	+	chr1	33908225	34308661	ENSMUSG00000026131	Dst	+	8
chr1	34190723	34190729	cluster:766	27	+	chr1	33908225	34308661	ENSMUSG00000026131	Dst	+	6
chr1	34190791	34190796	cluster:767	7	+	chr1	33908225	34308661	ENSMUSG00000026131	Dst	+	5
chr1	34190812	34190822	cluster:768	21	+	chr1	33908225	34308661	ENSMUSG00000026131	Dst	+	10
chr1	34190852	34190873	cluster:769	33	+	chr1	33908225	34308661	ENSMUSG00000026131	Dst	+	21
chr1	34190884	34190886	cluster:770	42	+	chr1	33908225	34308661	ENSMUSG00000026131	Dst	+	2
chr1	34190917	34190927	cluster:771	23	+	chr1	33908225	34308661	ENSMUSG00000026131	Dst	+	10
chr1	34190970	34190973	cluster:772	14	+	chr1	33908225	34308661	ENSMUSG00000026131	Dst	+	3
chr1	34190998	34191003	cluster:773	26	+	chr1	33908225	34308661	ENSMUSG00000026131	Dst	+	5
chr1	34191022	34191033	cluster:774	34	+	chr1	33908225	34308661	ENSMUSG00000026131	Dst	+	11
chr1	34191082	34191116	cluster:775	60	+	chr1	33908225	34308661	ENSMUSG00000026131	Dst	+	34
chr1	34191168	34191172	cluster:776	19	+	chr1	33908225	34308661	ENSMUSG00000026131	Dst	+	4
chr1	34191222	34191225	cluster:777	14	+	chr1	33908225	34308661	ENSMUSG00000026131	Dst	+	3
chr1	34191250	34191254	cluster:778	26	+	chr1	33908225	34308661	ENSMUSG00000026131	Dst	+	4
chr1	34191268	34191280	cluster:779	30	+	chr1	33908225	34308661	ENSMUSG00000026131	Dst	+	12
chr1	34191311	34191345	cluster:780	47	+	chr1	33908225	34308661	ENSMUSG00000026131	Dst	+	34
chr1	34191469	34191474	cluster:781	21	+	chr1	33908225	34308661	ENSMUSG00000026131	Dst	+	5
chr1	34191516	34191528	cluster:782	27	+	chr1	33908225	34308661	ENSMUSG00000026131	Dst	+	12
chr1	34191555	34191587	cluster:783	28	+	chr1	33908225	34308661	ENSMUSG00000026131	Dst	+	32
chr1	34191608	34191620	cluster:784	20	+	chr1	33908225	34308661	ENSMUSG00000026131	Dst	+	12
chr1	34191656	34191664	cluster:785	19	+	chr1	33908225	34308661	ENSMUSG00000026131	Dst	+	8
chr1	34191678	34191681	cluster:786	11	+	chr1	33908225	34308661	ENSMUSG00000026131	Dst	+	3
chr1	34191815	34191824	cluster:787	26	+	chr1	33908225	34308661	ENSMUSG00000026131	Dst	+	9
chr1	34191882	34191887	cluster:788	23	+	chr1	33908225	34308661	ENSMUSG00000026131	Dst	+	5
chr1	34191906	34191917	cluster:789	13	+	chr1	33908225	34308661	ENSMUSG00000026131	Dst	+	11
chr1	34191939	34191947	cluster:790	23	+	chr1	33908225	34308661	ENSMUSG00000026131	Dst	+	8
chr1	34192088	34192098	cluster:791	29	+	chr1	33908225	34308661	ENSMUSG00000026131	Dst	+	10
chr1	34192144	34192159	cluster:792	18	+	chr1	33908225	34308661	ENSMUSG00000026131	Dst	+	15
chr1	34192186	34192188	cluster:793	11	+	chr1	33908225	34308661	ENSMUSG00000026131	Dst	+	2
chr1	34192275	34192280	cluster:794	19	+	chr1	33908225	34308661	ENSMUSG00000026131	Dst	+	5
chr1	34192310	34192321	cluster:795	11	+	chr1	33908225	34308661	ENSMUSG00000026131	Dst	+	11
chr1	34192348	34192355	cluster:796	17	+	chr1	33908225	34308661	ENSMUSG00000026131	Dst	+	7
chr1	34192437	34192440	cluster:797	19	+	chr1	33908225	34308661	ENSMUSG00000026131	Dst	+	3
chr1	34192457	34192460	cluster:798	12	+	chr1	33908225	34308661	ENSMUSG00000026131	Dst	+	3
chr1	34192542	34192562	cluster:799	40	+	chr1	33908225	34308661	ENSMUSG00000026131	Dst	+	20
chr1	34192578	34192587	cluster:800	18	+	chr1	33908225	34308661	ENSMUSG00000026131	Dst	+	9
chr1	34192635	34192637	cluster:802	14	+	chr1	33908225	34308661	ENSMUSG00000026131	Dst	+	2
chr1	34192677	34192687	cluster:803	9	+	chr1	33908225	34308661	ENSMUSG00000026131	Dst	+	10
chr1	34192796	34192826	cluster:804	57	+	chr1	33908225	34308661	ENSMUSG00000026131	Dst	+	30
chr1	34192865	34192877	cluster:805	15	+	chr1	33908225	34308661	ENSMUSG00000026131	Dst	+	12
chr1	34192919	34192925	cluster:806	27	+	chr1	33908225	34308661	ENSMUSG00000026131	Dst	+	6
chr1	34192940	34192952	cluster:807	40	+	chr1	33908225	34308661	ENSMUSG00000026131	Dst	+	12
chr1	34193048	34193054	cluster:808	8	+	chr1	33908225	34308661	ENSMUSG00000026131	Dst	+	6
chr1	34193098	34193110	cluster:810	20	+	chr1	33908225	34308661	ENSMUSG00000026131	Dst	+	12
chr1	34193126	34193134	cluster:811	9	+	chr1	33908225	34308661	ENSMUSG00000026131	Dst	+	8
chr1	34193237	34193243	cluster:812	10	+	chr1	33908225	34308661	ENSMUSG00000026131	Dst	+	6
chr1	34193378	34193387	cluster:813	30	+	chr1	33908225	34308661	ENSMUSG00000026131	Dst	+	9
chr1	34193414	34193424	cluster:814	48	+	chr1	33908225	34308661	ENSMUSG00000026131	Dst	+	10
chr1	34193444	34193461	cluster:815	40	+	chr1	33908225	34308661	ENSMUSG00000026131	Dst	+	17
chr1	34194007	34194019	cluster:816	30	+	chr1	33908225	34308661	ENSMUSG00000026131	Dst	+	12
chr1	34194069	34194101	cluster:818	32	+	chr1	33908225	34308661	ENSMUSG00000026131	Dst	+	32
chr1	34194138	34194154	cluster:819	23	+	chr1	33908225	34308661	ENSMUSG00000026131	Dst	+	16
chr1	34194192	34194201	cluster:820	25	+	chr1	33908225	34308661	ENSMUSG00000026131	Dst	+	9
chr1	34194513	34194518	cluster:821	9	+	chr1	33908225	34308661	ENSMUSG00000026131	Dst	+	5
chr1	34194531	34194556	cluster:822	42	+	chr1	33908225	34308661	ENSMUSG00000026131	Dst	+	25
chr1	34194568	34194577	cluster:823	29	+	chr1	33908225	34308661	ENSMUSG00000026131	Dst	+	9
chr1	34194632	34194638	cluster:824	25	+	chr1	33908225	34308661	ENSMUSG00000026131	Dst	+	6
chr1	34194655	34194661	cluster:825	25	+	chr1	33908225	34308661	ENSMUSG00000026131	Dst	+	6
chr1	34195842	34195857	cluster:826	36	+	chr1	33908225	34308661	ENSMUSG00000026131	Dst	+	15
chr1	34195868	34195878	cluster:827	54	+	chr1	33908225	34308661	ENSMUSG00000026131	Dst	+	10
chr1	34195892	34195906	cluster:828	50	+	chr1	33908225	34308661	ENSMUSG00000026131	Dst	+	14
chr1	34195975	34195980	cluster:829	18	+	chr1	33908225	34308661	ENSMUSG00000026131	Dst	+	5
chr1	34196050	34196056	cluster:830	32	+	chr1	33908225	34308661	ENSMUSG00000026131	Dst	+	6
chr1	34196092	34196100	cluster:831	36	+	chr1	33908225	34308661	ENSMUSG00000026131	Dst	+	8
chr1	34196116	34196125	cluster:832	31	+	chr1	33908225	34308661	ENSMUSG00000026131	Dst	+	9
chr1	34196655	34196677	cluster:833	50	+	chr1	33908225	34308661	ENSMUSG00000026131	Dst	+	22
chr1	34196699	34196704	cluster:834	38	+	chr1	33908225	34308661	ENSMUSG00000026131	Dst	+	5
chr1	34196852	34196863	cluster:835	32	+	chr1	33908225	34308661	ENSMUSG00000026131	Dst	+	11
chr1	34196894	34196897	cluster:836	36	+	chr1	33908225	34308661	ENSMUSG00000026131	Dst	+	3
chr1	34196913	34196924	cluster:837	30	+	chr1	33908225	34308661	ENSMUSG00000026131	Dst	+	11
chr1	34196943	34196955	cluster:838	28	+	chr1	33908225	34308661	ENSMUSG00000026131	Dst	+	12
chr1	34196990	34197003	cluster:839	28	+	chr1	33908225	34308661	ENSMUSG00000026131	Dst	+	13
chr1	34197037	34197060	cluster:841	38	+	chr1	33908225	34308661	ENSMUSG00000026131	Dst	+	23
chr1	34197081	34197089	cluster:842	13	+	chr1	33908225	34308661	ENSMUSG00000026131	Dst	+	8
chr1	34197178	34197186	cluster:843	14	+	chr1	33908225	34308661	ENSMUSG00000026131	Dst	+	8
chr1	34197251	34197262	cluster:844	32	+	chr1	33908225	34308661	ENSMUSG00000026131	Dst	+	11
chr1	34197280	34197306	cluster:845	42	+	chr1	33908225	34308661	ENSMUSG00000026131	Dst	+	26
chr1	34197335	34197343	cluster:846	23	+	chr1	33908225	34308661	ENSMUSG00000026131	Dst	+	8
chr1	34197442	34197446	cluster:847	7	+	chr1	33908225	34308661	ENSMUSG00000026131	Dst	+	4
chr1	34198521	34198546	cluster:848	75	+	chr1	33908225	34308661	ENSMUSG00000026131	Dst	+	25
chr1	34198561	34198589	cluster:849	97	+	chr1	33908225	34308661	ENSMUSG00000026131	Dst	+	28
chr1	34198604	34198652	cluster:850	66	+	chr1	33908225	34308661	ENSMUSG00000026131	Dst	+	48
chr1	34198723	34198732	cluster:852	14	+	chr1	33908225	34308661	ENSMUSG00000026131	Dst	+	9
chr1	34199329	34199332	cluster:853	20	+	chr1	33908225	34308661	ENSMUSG00000026131	Dst	+	3
chr1	34199360	34199362	cluster:854	21	+	chr1	33908225	34308661	ENSMUSG00000026131	Dst	+	2
chr1	34199414	34199448	cluster:855	39	+	chr1	33908225	34308661	ENSMUSG00000026131	Dst	+	34
chr1	34199471	34199481	cluster:856	18	+	chr1	33908225	34308661	ENSMUSG00000026131	Dst	+	10
chr1	34199542	34199553	cluster:858	14	+	chr1	33908225	34308661	ENSMUSG00000026131	Dst	+	11
chr1	34200039	34200048	cluster:860	9	+	chr1	33908225	34308661	ENSMUSG00000026131	Dst	+	9
chr1	34201014	34201023	cluster:861	30	+	chr1	33908225	34308661	ENSMUSG00000026131	Dst	+	9
chr1	34201086	34201109	cluster:862	31	+	chr1	33908225	34308661	ENSMUSG00000026131	Dst	+	23
chr1	34201195	34201282	cluster:863	154	+	chr1	33908225	34308661	ENSMUSG00000026131	Dst	+	87
chr1	34201293	34201329	cluster:864	128	+	chr1	33908225	34308661	ENSMUSG00000026131	Dst	+	36
chr1	34201352	34201362	cluster:865	22	+	chr1	33908225	34308661	ENSMUSG00000026131	Dst	+	10
chr1	34201378	34201385	cluster:866	12	+	chr1	33908225	34308661	ENSMUSG00000026131	Dst	+	7
chr1	34201438	34201443	cluster:867	19	+	chr1	33908225	34308661	ENSMUSG00000026131	Dst	+	5
chr1	34201482	34201498	cluster:868	24	+	chr1	33908225	34308661	ENSMUSG00000026131	Dst	+	16
chr1	34201621	34201642	cluster:869	17	+	chr1	33908225	34308661	ENSMUSG00000026131	Dst	+	21
chr1	34202268	34202271	cluster:870	11	+	chr1	33908225	34308661	ENSMUSG00000026131	Dst	+	3
chr1	34202495	34202502	cluster:871	16	+	chr1	33908225	34308661	ENSMUSG00000026131	Dst	+	7
chr1	34202561	34202564	cluster:872	34	+	chr1	33908225	34308661	ENSMUSG00000026131	Dst	+	3
chr1	34208619	34208627	cluster:873	24	+	chr1	33908225	34308661	ENSMUSG00000026131	Dst	+	8
chr1	34211300	34211312	cluster:874	12	+	chr1	33908225	34308661	ENSMUSG00000026131	Dst	+	12
chr1	34212283	34212290	cluster:875	35	+	chr1	33908225	34308661	ENSMUSG00000026131	Dst	+	7
chr1	34212308	34212317	cluster:876	31	+	chr1	33908225	34308661	ENSMUSG00000026131	Dst	+	9
chr1	34212354	34212359	cluster:877	32	+	chr1	33908225	34308661	ENSMUSG00000026131	Dst	+	5
chr1	34212377	34212390	cluster:878	33	+	chr1	33908225	34308661	ENSMUSG00000026131	Dst	+	13
chr1	34212459	34212462	cluster:879	27	+	chr1	33908225	34308661	ENSMUSG00000026131	Dst	+	3
chr1	34212477	34212486	cluster:880	22	+	chr1	33908225	34308661	ENSMUSG00000026131	Dst	+	9
chr1	34212980	34212992	cluster:881	23	+	chr1	33908225	34308661	ENSMUSG00000026131	Dst	+	12
chr1	34213019	34213037	cluster:882	19	+	chr1	33908225	34308661	ENSMUSG00000026131	Dst	+	18
chr1	34214570	34214575	cluster:883	29	+	chr1	33908225	34308661	ENSMUSG00000026131	Dst	+	5
chr1	34214606	34214615	cluster:884	11	+	chr1	33908225	34308661	ENSMUSG00000026131	Dst	+	9
chr1	34215575	34215581	cluster:886	14	+	chr1	33908225	34308661	ENSMUSG00000026131	Dst	+	6
chr1	34217838	34217857	cluster:887	34	+	chr1	33908225	34308661	ENSMUSG00000026131	Dst	+	19
chr1	34218336	34218355	cluster:889	33	+	chr1	33908225	34308661	ENSMUSG00000026131	Dst	+	19
chr1	34218370	34218382	cluster:890	28	+	chr1	33908225	34308661	ENSMUSG00000026131	Dst	+	12
chr1	34219395	34219423	cluster:891	68	+	chr1	33908225	34308661	ENSMUSG00000026131	Dst	+	28
chr1	34223797	34223807	cluster:892	18	+	chr1	33908225	34308661	ENSMUSG00000026131	Dst	+	10
chr1	34223834	34223839	cluster:893	16	+	chr1	33908225	34308661	ENSMUSG00000026131	Dst	+	5
chr1	34223903	34223919	cluster:894	9	+	chr1	33908225	34308661	ENSMUSG00000026131	Dst	+	16
chr1	34225602	34225616	cluster:895	16	+	chr1	33908225	34308661	ENSMUSG00000026131	Dst	+	14
chr1	34225660	34225682	cluster:896	26	+	chr1	33908225	34308661	ENSMUSG00000026131	Dst	+	22
chr1	34225822	34225829	cluster:897	10	+	chr1	33908225	34308661	ENSMUSG00000026131	Dst	+	7
chr1	34225906	34225946	cluster:899	62	+	chr1	33908225	34308661	ENSMUSG00000026131	Dst	+	40
chr1	34225958	34225985	cluster:900	70	+	chr1	33908225	34308661	ENSMUSG00000026131	Dst	+	27
chr1	34227777	34227784	cluster:902	11	+	chr1	33908225	34308661	ENSMUSG00000026131	Dst	+	7
chr1	34227811	34227821	cluster:903	21	+	chr1	33908225	34308661	ENSMUSG00000026131	Dst	+	10
chr1	34227841	34227843	cluster:904	16	+	chr1	33908225	34308661	ENSMUSG00000026131	Dst	+	2
chr1	34227857	34227875	cluster:905	30	+	chr1	33908225	34308661	ENSMUSG00000026131	Dst	+	18
chr1	34227892	34227897	cluster:906	23	+	chr1	33908225	34308661	ENSMUSG00000026131	Dst	+	5
chr1	34227956	34227959	cluster:907	31	+	chr1	33908225	34308661	ENSMUSG00000026131	Dst	+	3
chr1	34227972	34227992	cluster:908	32	+	chr1	33908225	34308661	ENSMUSG00000026131	Dst	+	20
chr1	34228011	34228015	cluster:909	13	+	chr1	33908225	34308661	ENSMUSG00000026131	Dst	+	4
chr1	34228065	34228071	cluster:910	18	+	chr1	33908225	34308661	ENSMUSG00000026131	Dst	+	6
chr1	34228085	34228088	cluster:911	11	+	chr1	33908225	34308661	ENSMUSG00000026131	Dst	+	3
chr1	34228147	34228149	cluster:912	12	+	chr1	33908225	34308661	ENSMUSG00000026131	Dst	+	2
chr1	34228236	34228238	cluster:913	11	+	chr1	33908225	34308661	ENSMUSG00000026131	Dst	+	2
chr1	34228287	34228295	cluster:914	25	+	chr1	33908225	34308661	ENSMUSG00000026131	Dst	+	8
chr1	34228308	34228310	cluster:915	13	+	chr1	33908225	34308661	ENSMUSG00000026131	Dst	+	2
chr1	34228351	34228385	cluster:916	35	+	chr1	33908225	34308661	ENSMUSG00000026131	Dst	+	34
chr1	34228461	34228488	cluster:917	37	+	chr1	33908225	34308661	ENSMUSG00000026131	Dst	+	27
chr1	34228503	34228511	cluster:918	26	+	chr1	33908225	34308661	ENSMUSG00000026131	Dst	+	8
chr1	34228535	34228542	cluster:919	16	+	chr1	33908225	34308661	ENSMUSG00000026131	Dst	+	7
chr1	34228561	34228565	cluster:920	12	+	chr1	33908225	34308661	ENSMUSG00000026131	Dst	+	4
chr1	34228689	34228693	cluster:921	11	+	chr1	33908225	34308661	ENSMUSG00000026131	Dst	+	4
chr1	34228765	34228772	cluster:922	14	+	chr1	33908225	34308661	ENSMUSG00000026131	Dst	+	7
chr1	34228787	34228803	cluster:923	12	+	chr1	33908225	34308661	ENSMUSG00000026131	Dst	+	16
chr1	34228897	34228921	cluster:924	30	+	chr1	33908225	34308661	ENSMUSG00000026131	Dst	+	24
chr1	34229030	34229035	cluster:925	30	+	chr1	33908225	34308661	ENSMUSG00000026131	Dst	+	5
chr1	34229231	34229242	cluster:926	37	+	chr1	33908225	34308661	ENSMUSG00000026131	Dst	+	11
chr1	34229338	34229351	cluster:927	21	+	chr1	33908225	34308661	ENSMUSG00000026131	Dst	+	13
chr1	34229390	34229401	cluster:929	14	+	chr1	33908225	34308661	ENSMUSG00000026131	Dst	+	11
chr1	34236865	34236872	cluster:930	7	+	chr1	33908225	34308661	ENSMUSG00000026131	Dst	+	7
chr1	34237141	34237149	cluster:931	12	+	chr1	33908225	34308661	ENSMUSG00000026131	Dst	+	8
chr1	34237212	34237216	cluster:932	13	+	chr1	33908225	34308661	ENSMUSG00000026131	Dst	+	4
chr1	34237414	34237416	cluster:933	10	+	chr1	33908225	34308661	ENSMUSG00000026131	Dst	+	2
chr1	34237433	34237436	cluster:934	8	+	chr1	33908225	34308661	ENSMUSG00000026131	Dst	+	3
chr1	34237504	34237511	cluster:935	18	+	chr1	33908225	34308661	ENSMUSG00000026131	Dst	+	7
chr1	34237588	34237598	cluster:936	19	+	chr1	33908225	34308661	ENSMUSG00000026131	Dst	+	10
chr1	34242690	34242692	cluster:937	10	+	chr1	33908225	34308661	ENSMUSG00000026131	Dst	+	2
chr1	34242741	34242749	cluster:938	15	+	chr1	33908225	34308661	ENSMUSG00000026131	Dst	+	8
chr1	34244444	34244456	cluster:939	15	+	chr1	33908225	34308661	ENSMUSG00000026131	Dst	+	12
chr1	34247698	34247701	cluster:940	9	+	chr1	33908225	34308661	ENSMUSG00000026131	Dst	+	3
chr1	34247742	34247753	cluster:941	12	+	chr1	33908225	34308661	ENSMUSG00000026131	Dst	+	11
chr1	34247771	34247778	cluster:942	16	+	chr1	33908225	34308661	ENSMUSG00000026131	Dst	+	7
chr1	34249490	34249492	cluster:943	10	+	chr1	33908225	34308661	ENSMUSG00000026131	Dst	+	2
chr1	34249592	34249600	cluster:944	13	+	chr1	33908225	34308661	ENSMUSG00000026131	Dst	+	8
chr1	34249620	34249626	cluster:945	19	+	chr1	33908225	34308661	ENSMUSG00000026131	Dst	+	6
chr1	34250221	34250238	cluster:946	24	+	chr1	33908225	34308661	ENSMUSG00000026131	Dst	+	17
chr1	34250589	34250591	cluster:947	8	+	chr1	33908225	34308661	ENSMUSG00000026131	Dst	+	2
chr1	34251575	34251581	cluster:948	9	+	chr1	33908225	34308661	ENSMUSG00000026131	Dst	+	6
chr1	34251880	34251888	cluster:949	8	+	chr1	33908225	34308661	ENSMUSG00000026131	Dst	+	8
chr1	34251907	34251916	cluster:950	24	+	chr1	33908225	34308661	ENSMUSG00000026131	Dst	+	9
chr1	34252819	34252827	cluster:951	15	+	chr1	33908225	34308661	ENSMUSG00000026131	Dst	+	8
chr1	34252857	34252859	cluster:952	12	+	chr1	33908225	34308661	ENSMUSG00000026131	Dst	+	2
chr1	34252990	34253008	cluster:953	18	+	chr1	33908225	34308661	ENSMUSG00000026131	Dst	+	18
chr1	34253129	34253153	cluster:954	16	+	chr1	33908225	34308661	ENSMUSG00000026131	Dst	+	24
chr1	34254077	34254082	cluster:955	6	+	chr1	33908225	34308661	ENSMUSG00000026131	Dst	+	5
chr1	34256249	34256264	cluster:956	27	+	chr1	33908225	34308661	ENSMUSG00000026131	Dst	+	15
chr1	34256302	34256304	cluster:958	18	+	chr1	33908225	34308661	ENSMUSG00000026131	Dst	+	2
chr1	34256318	34256324	cluster:959	13	+	chr1	33908225	34308661	ENSMUSG00000026131	Dst	+	6
chr1	34256383	34256386	cluster:960	12	+	chr1	33908225	34308661	ENSMUSG00000026131	Dst	+	3
chr1	34256542	34256544	cluster:961	43	+	chr1	33908225	34308661	ENSMUSG00000026131	Dst	+	2
chr1	34256556	34256567	cluster:962	44	+	chr1	33908225	34308661	ENSMUSG00000026131	Dst	+	11
chr1	34256589	34256595	cluster:963	47	+	chr1	33908225	34308661	ENSMUSG00000026131	Dst	+	6
chr1	34257810	34257821	cluster:965	18	+	chr1	33908225	34308661	ENSMUSG00000026131	Dst	+	11
chr1	34257833	34257843	cluster:966	19	+	chr1	33908225	34308661	ENSMUSG00000026131	Dst	+	10
chr1	34260167	34260173	cluster:968	17	+	chr1	33908225	34308661	ENSMUSG00000026131	Dst	+	6
chr1	34260259	34260275	cluster:969	31	+	chr1	33908225	34308661	ENSMUSG00000026131	Dst	+	16
chr1	34262020	34262032	cluster:970	16	+	chr1	33908225	34308661	ENSMUSG00000026131	Dst	+	12
chr1	34262088	34262092	cluster:971	22	+	chr1	33908225	34308661	ENSMUSG00000026131	Dst	+	4
chr1	34262108	34262115	cluster:972	27	+	chr1	33908225	34308661	ENSMUSG00000026131	Dst	+	7
chr1	34262239	34262241	cluster:973	12	+	chr1	33908225	34308661	ENSMUSG00000026131	Dst	+	2
chr1	34263003	34263014	cluster:974	14	+	chr1	33908225	34308661	ENSMUSG00000026131	Dst	+	11
chr1	34263266	34263274	cluster:975	25	+	chr1	33908225	34308661	ENSMUSG00000026131	Dst	+	8
chr1	34263286	34263293	cluster:976	34	+	chr1	33908225	34308661	ENSMUSG00000026131	Dst	+	7
chr1	34263369	34263371	cluster:978	21	+	chr1	33908225	34308661	ENSMUSG00000026131	Dst	+	2
chr1	34263420	34263424	cluster:980	24	+	chr1	33908225	34308661	ENSMUSG00000026131	Dst	+	4
chr1	34263456	34263461	cluster:981	9	+	chr1	33908225	34308661	ENSMUSG00000026131	Dst	+	5
chr1	34263512	34263522	cluster:982	20	+	chr1	33908225	34308661	ENSMUSG00000026131	Dst	+	10
chr1	34263802	34263811	cluster:983	25	+	chr1	33908225	34308661	ENSMUSG00000026131	Dst	+	9
chr1	34263847	34263850	cluster:984	10	+	chr1	33908225	34308661	ENSMUSG00000026131	Dst	+	3
chr1	34264170	34264175	cluster:985	14	+	chr1	33908225	34308661	ENSMUSG00000026131	Dst	+	5
chr1	34264296	34264301	cluster:986	12	+	chr1	33908225	34308661	ENSMUSG00000026131	Dst	+	5
chr1	34264336	34264353	cluster:987	14	+	chr1	33908225	34308661	ENSMUSG00000026131	Dst	+	17
chr1	34264539	34264547	cluster:988	23	+	chr1	33908225	34308661	ENSMUSG00000026131	Dst	+	8
chr1	34264594	34264600	cluster:989	26	+	chr1	33908225	34308661	ENSMUSG00000026131	Dst	+	6
chr1	34264753	34264755	cluster:990	17	+	chr1	33908225	34308661	ENSMUSG00000026131	Dst	+	2
chr1	34264833	34264844	cluster:991	23	+	chr1	33908225	34308661	ENSMUSG00000026131	Dst	+	11
chr1	34266860	34266866	cluster:992	20	+	chr1	33908225	34308661	ENSMUSG00000026131	Dst	+	6
chr1	34266915	34266921	cluster:993	8	+	chr1	33908225	34308661	ENSMUSG00000026131	Dst	+	6
chr1	34266945	34266948	cluster:994	6	+	chr1	33908225	34308661	ENSMUSG00000026131	Dst	+	3
chr1	34268230	34268247	cluster:995	19	+	chr1	33908225	34308661	ENSMUSG00000026131	Dst	+	17
chr1	34269954	34269961	cluster:996	14	+	chr1	33908225	34308661	ENSMUSG00000026131	Dst	+	7
chr1	34270853	34270859	cluster:997	12	+	chr1	33908225	34308661	ENSMUSG00000026131	Dst	+	6
chr1	34270893	34270919	cluster:998	45	+	chr1	33908225	34308661	ENSMUSG00000026131	Dst	+	26
chr1	34270934	34270951	cluster:999	44	+	chr1	33908225	34308661	ENSMUSG00000026131	Dst	+	17
chr1	34271364	34271373	cluster:1000	28	+	chr1	33908225	34308661	ENSMUSG00000026131	Dst	+	9
chr1	34274202	34274204	cluster:1001	8	+	chr1	33908225	34308661	ENSMUSG00000026131	Dst	+	2
chr1	34274237	34274241	cluster:1002	18	+	chr1	33908225	34308661	ENSMUSG00000026131	Dst	+	4
chr1	34274325	34274327	cluster:1003	7	+	chr1	33908225	34308661	ENSMUSG00000026131	Dst	+	2
chr1	34275241	34275245	cluster:1004	7	+	chr1	33908225	34308661	ENSMUSG00000026131	Dst	+	4
chr1	34275264	34275266	cluster:1005	14	+	chr1	33908225	34308661	ENSMUSG00000026131	Dst	+	2
chr1	34275342	34275346	cluster:1006	33	+	chr1	33908225	34308661	ENSMUSG00000026131	Dst	+	4
chr1	34275670	34275676	cluster:1007	17	+	chr1	33908225	34308661	ENSMUSG00000026131	Dst	+	6
chr1	34275711	34275713	cluster:1008	27	+	chr1	33908225	34308661	ENSMUSG00000026131	Dst	+	2
chr1	34275747	34275758	cluster:1009	16	+	chr1	33908225	34308661	ENSMUSG00000026131	Dst	+	11
chr1	34282425	34282429	cluster:1012	10	+	chr1	33908225	34308661	ENSMUSG00000026131	Dst	+	4
chr1	34282549	34282566	cluster:1013	23	+	chr1	33908225	34308661	ENSMUSG00000026131	Dst	+	17
chr1	34284285	34284294	cluster:1014	20	+	chr1	33908225	34308661	ENSMUSG00000026131	Dst	+	9
chr1	34284373	34284388	cluster:1015	16	+	chr1	33908225	34308661	ENSMUSG00000026131	Dst	+	15
chr1	34287338	34287345	cluster:1016	14	+	chr1	33908225	34308661	ENSMUSG00000026131	Dst	+	7
chr1	34287956	34287960	cluster:1017	14	+	chr1	33908225	34308661	ENSMUSG00000026131	Dst	+	4
chr1	34287977	34287987	cluster:1018	13	+	chr1	33908225	34308661	ENSMUSG00000026131	Dst	+	10
chr1	34291786	34291790	cluster:1019	15	+	chr1	33908225	34308661	ENSMUSG00000026131	Dst	+	4
chr1	34291811	34291820	cluster:1020	17	+	chr1	33908225	34308661	ENSMUSG00000026131	Dst	+	9
chr1	34294386	34294408	cluster:1021	27	+	chr1	33908225	34308661	ENSMUSG00000026131	Dst	+	22
chr1	34295226	34295233	cluster:1022	26	+	chr1	33908225	34308661	ENSMUSG00000026131	Dst	+	7
chr1	34295291	34295297	cluster:1023	11	+	chr1	33908225	34308661	ENSMUSG00000026131	Dst	+	6
chr1	34295499	34295504	cluster:1024	12	+	chr1	33908225	34308661	ENSMUSG00000026131	Dst	+	5
chr1	34298543	34298547	cluster:1025	8	+	chr1	33908225	34308661	ENSMUSG00000026131	Dst	+	4
chr1	34302958	34302967	cluster:1027	13	+	chr1	33908225	34308661	ENSMUSG00000026131	Dst	+	9
chr1	34303432	34303435	cluster:1028	15	+	chr1	33908225	34308661	ENSMUSG00000026131	Dst	+	3
chr1	34306584	34306586	cluster:1029	7	+	chr1	33908225	34308661	ENSMUSG00000026131	Dst	+	2
chr1	34307409	34307415	cluster:1030	20	+	chr1	33908225	34308661	ENSMUSG00000026131	Dst	+	6
chr1	34307525	34307528	cluster:1031	13	+	chr1	33908225	34308661	ENSMUSG00000026131	Dst	+	3
chr1	34307566	34307570	cluster:1032	11	+	chr1	33908225	34308661	ENSMUSG00000026131	Dst	+	4
chr1	34307587	34307596	cluster:1033	75	+	chr1	33908225	34308661	ENSMUSG00000026131	Dst	+	9
chr1	34307622	34307632	cluster:1034	83	+	chr1	33908225	34308661	ENSMUSG00000026131	Dst	+	10
chr1	34307692	34307695	cluster:1035	21	+	chr1	33908225	34308661	ENSMUSG00000026131	Dst	+	3
chr1	34307726	34307775	cluster:1036	64	+	chr1	33908225	34308661	ENSMUSG00000026131	Dst	+	49
chr1	34307809	34307814	cluster:1037	15	+	chr1	33908225	34308661	ENSMUSG00000026131	Dst	+	5
chr1	34307892	34307897	cluster:1038	15	+	chr1	33908225	34308661	ENSMUSG00000026131	Dst	+	5
chr1	34307940	34307954	cluster:1039	36	+	chr1	33908225	34308661	ENSMUSG00000026131	Dst	+	14
chr1	34307996	34308025	cluster:1040	76	+	chr1	33908225	34308661	ENSMUSG00000026131	Dst	+	29
chr1	34308044	34308053	cluster:1041	43	+	chr1	33908225	34308661	ENSMUSG00000026131	Dst	+	9
chr1	34308563	34308568	cluster:1043	9	+	chr1	33908225	34308661	ENSMUSG00000026131	Dst	+	5
chr1	34437043	34437053	cluster:1044	10	-	chr1	34436670	34439672	ENSMUSG00000042111	Ccdc115	-	10
chr1	34442930	34442934	cluster:1045	16	+	chr1	34439851	34449356	ENSMUSG00000026127	Imp4	+	4
chr1	34442954	34442956	cluster:1046	11	+	chr1	34439851	34449356	ENSMUSG00000026127	Imp4	+	2
chr1	34444014	34444021	cluster:1047	17	+	chr1	34439851	34449356	ENSMUSG00000026127	Imp4	+	7
chr1	34444777	34444788	cluster:1048	15	+	chr1	34439851	34449356	ENSMUSG00000026127	Imp4	+	11
chr1	34813508	34813510	cluster:1050	11	-	chr1	34813219	34843065	ENSMUSG00000037503	Fam168b	-	2
chr1	34815697	34815712	cluster:1052	14	-	chr1	34813219	34843065	ENSMUSG00000037503	Fam168b	-	15
chr1	34816579	34816583	cluster:1054	16	-	chr1	34813219	34843065	ENSMUSG00000037503	Fam168b	-	4
chr1	34817215	34817218	cluster:1055	21	-	chr1	34813219	34843065	ENSMUSG00000037503	Fam168b	-	3
chr1	34819988	34819990	cluster:1056	13	-	chr1	34813219	34843065	ENSMUSG00000037503	Fam168b	-	2
chr1	36068458	36068464	cluster:1057	34	+	chr1	36068400	36106446	ENSMUSG00000045216	Hs6st1	+	6
chr1	36068476	36068478	cluster:1058	30	+	chr1	36068400	36106446	ENSMUSG00000045216	Hs6st1	+	2
chr1	36068640	36068644	cluster:1059	10	+	chr1	36068400	36106446	ENSMUSG00000045216	Hs6st1	+	4
chr1	36068656	36068659	cluster:1060	10	+	chr1	36068400	36106446	ENSMUSG00000045216	Hs6st1	+	3
chr1	36068680	36068694	cluster:1061	26	+	chr1	36068400	36106446	ENSMUSG00000045216	Hs6st1	+	14
chr1	36068707	36068712	cluster:1062	31	+	chr1	36068400	36106446	ENSMUSG00000045216	Hs6st1	+	5
chr1	36068748	36068760	cluster:1063	40	+	chr1	36068400	36106446	ENSMUSG00000045216	Hs6st1	+	12
chr1	36068813	36068826	cluster:1064	72	+	chr1	36068400	36106446	ENSMUSG00000045216	Hs6st1	+	13
chr1	36068837	36068867	cluster:1065	76	+	chr1	36068400	36106446	ENSMUSG00000045216	Hs6st1	+	30
chr1	36068904	36068906	cluster:1066	15	+	chr1	36068400	36106446	ENSMUSG00000045216	Hs6st1	+	2
chr1	36068924	36068939	cluster:1067	16	+	chr1	36068400	36106446	ENSMUSG00000045216	Hs6st1	+	15
chr1	36068960	36068974	cluster:1068	11	+	chr1	36068400	36106446	ENSMUSG00000045216	Hs6st1	+	14
chr1	36069028	36069039	cluster:1070	14	+	chr1	36068400	36106446	ENSMUSG00000045216	Hs6st1	+	11
chr1	36069077	36069082	cluster:1071	13	+	chr1	36068400	36106446	ENSMUSG00000045216	Hs6st1	+	5
chr1	36069095	36069127	cluster:1072	27	+	chr1	36068400	36106446	ENSMUSG00000045216	Hs6st1	+	32
chr1	36069279	36069286	cluster:1073	9	+	chr1	36068400	36106446	ENSMUSG00000045216	Hs6st1	+	7
chr1	36069320	36069328	cluster:1074	11	+	chr1	36068400	36106446	ENSMUSG00000045216	Hs6st1	+	8
chr1	36069349	36069363	cluster:1075	24	+	chr1	36068400	36106446	ENSMUSG00000045216	Hs6st1	+	14
chr1	36069461	36069466	cluster:1076	13	+	chr1	36068400	36106446	ENSMUSG00000045216	Hs6st1	+	5
chr1	36070102	36070117	cluster:1077	18	+	chr1	36068400	36106446	ENSMUSG00000045216	Hs6st1	+	15
chr1	36070378	36070382	cluster:1079	7	+	chr1	36068400	36106446	ENSMUSG00000045216	Hs6st1	+	4
chr1	36071259	36071269	cluster:1080	13	+	chr1	36068400	36106446	ENSMUSG00000045216	Hs6st1	+	10
chr1	36088920	36088929	cluster:1081	10	+	chr1	36068400	36106446	ENSMUSG00000045216	Hs6st1	+	9
chr1	36097711	36097718	cluster:1083	13	+	chr1	36068400	36106446	ENSMUSG00000045216	Hs6st1	+	7
chr1	36101863	36101865	cluster:1085	11	+	chr1	36068400	36106446	ENSMUSG00000045216	Hs6st1	+	2
chr1	36103519	36103527	cluster:1086	15	+	chr1	36068400	36106446	ENSMUSG00000045216	Hs6st1	+	8
chr1	36103547	36103554	cluster:1087	13	+	chr1	36068400	36106446	ENSMUSG00000045216	Hs6st1	+	7
chr1	36103572	36103578	cluster:1088	15	+	chr1	36068400	36106446	ENSMUSG00000045216	Hs6st1	+	6
chr1	36103777	36103791	cluster:1089	25	+	chr1	36068400	36106446	ENSMUSG00000045216	Hs6st1	+	14
chr1	36103864	36103872	cluster:1090	13	+	chr1	36068400	36106446	ENSMUSG00000045216	Hs6st1	+	8
chr1	36103888	36103907	cluster:1091	36	+	chr1	36068400	36106446	ENSMUSG00000045216	Hs6st1	+	19
chr1	36103992	36103994	cluster:1092	12	+	chr1	36068400	36106446	ENSMUSG00000045216	Hs6st1	+	2
chr1	36104031	36104033	cluster:1093	25	+	chr1	36068400	36106446	ENSMUSG00000045216	Hs6st1	+	2
chr1	36104044	36104049	cluster:1094	33	+	chr1	36068400	36106446	ENSMUSG00000045216	Hs6st1	+	5
chr1	36104136	36104139	cluster:1096	6	+	chr1	36068400	36106446	ENSMUSG00000045216	Hs6st1	+	3
chr1	36104280	36104291	cluster:1097	14	+	chr1	36068400	36106446	ENSMUSG00000045216	Hs6st1	+	11
chr1	36104463	36104465	cluster:1098	10	+	chr1	36068400	36106446	ENSMUSG00000045216	Hs6st1	+	2
chr1	36104494	36104528	cluster:1099	23	+	chr1	36068400	36106446	ENSMUSG00000045216	Hs6st1	+	34
chr1	36104555	36104559	cluster:1100	21	+	chr1	36068400	36106446	ENSMUSG00000045216	Hs6st1	+	4
chr1	36104846	36104848	cluster:1101	19	+	chr1	36068400	36106446	ENSMUSG00000045216	Hs6st1	+	2
chr1	36104889	36104891	cluster:1102	19	+	chr1	36068400	36106446	ENSMUSG00000045216	Hs6st1	+	2
chr1	36104933	36104937	cluster:1103	9	+	chr1	36068400	36106446	ENSMUSG00000045216	Hs6st1	+	4
chr1	36105049	36105052	cluster:1104	8	+	chr1	36068400	36106446	ENSMUSG00000045216	Hs6st1	+	3
chr1	36105219	36105231	cluster:1105	19	+	chr1	36068400	36106446	ENSMUSG00000045216	Hs6st1	+	12
chr1	36105618	36105632	cluster:1106	14	+	chr1	36068400	36106446	ENSMUSG00000045216	Hs6st1	+	14
chr1	36105704	36105706	cluster:1108	10	+	chr1	36068400	36106446	ENSMUSG00000045216	Hs6st1	+	2
chr1	36105867	36105869	cluster:1109	10	+	chr1	36068400	36106446	ENSMUSG00000045216	Hs6st1	+	2
chr1	36106096	36106102	cluster:1111	11	+	chr1	36068400	36106446	ENSMUSG00000045216	Hs6st1	+	6
chr1	36106384	36106386	cluster:1112	14	+	chr1	36068400	36106446	ENSMUSG00000045216	Hs6st1	+	2
chr1	36144191	36144200	cluster:1114	10	-	chr1	36140027	36244720	ENSMUSG00000037470	Uggt1	-	9
chr1	36155242	36155244	cluster:1115	17	-	chr1	36140027	36244720	ENSMUSG00000037470	Uggt1	-	2
chr1	36156230	36156242	cluster:1116	8	-	chr1	36140027	36244720	ENSMUSG00000037470	Uggt1	-	12
chr1	36157436	36157443	cluster:1117	11	-	chr1	36140027	36244720	ENSMUSG00000037470	Uggt1	-	7
chr1	36162294	36162304	cluster:1118	12	-	chr1	36140027	36244720	ENSMUSG00000037470	Uggt1	-	10
chr1	36173502	36173504	cluster:1120	12	-	chr1	36140027	36244720	ENSMUSG00000037470	Uggt1	-	2
chr1	36173521	36173535	cluster:1121	13	-	chr1	36140027	36244720	ENSMUSG00000037470	Uggt1	-	14
chr1	36174189	36174193	cluster:1122	15	-	chr1	36140027	36244720	ENSMUSG00000037470	Uggt1	-	4
chr1	36176275	36176286	cluster:1123	14	-	chr1	36140027	36244720	ENSMUSG00000037470	Uggt1	-	11
chr1	36176768	36176779	cluster:1124	8	-	chr1	36140027	36244720	ENSMUSG00000037470	Uggt1	-	11
chr1	36177569	36177572	cluster:1125	9	-	chr1	36140027	36244720	ENSMUSG00000037470	Uggt1	-	3
chr1	36191599	36191608	cluster:1126	9	-	chr1	36140027	36244720	ENSMUSG00000037470	Uggt1	-	9
chr1	36216181	36216184	cluster:1128	13	-	chr1	36140027	36244720	ENSMUSG00000037470	Uggt1	-	3
chr1	36216230	36216233	cluster:1129	10	-	chr1	36140027	36244720	ENSMUSG00000037470	Uggt1	-	3
chr1	36336709	36336719	cluster:1130	10	-	chr1	36335730	36369181	ENSMUSG00000010453	Kansl3	-	10
chr1	36355242	36355245	cluster:1131	9	-	chr1	36335730	36369181	ENSMUSG00000010453	Kansl3	-	3
chr1	36365633	36365641	cluster:1132	14	-	chr1	36335730	36369181	ENSMUSG00000010453	Kansl3	-	8
chr1	36366883	36366886	cluster:1133	11	-	chr1	36335730	36369181	ENSMUSG00000010453	Kansl3	-	3
chr1	36367613	36367617	cluster:1134	18	-	chr1	36335730	36369181	ENSMUSG00000010453	Kansl3	-	4
chr1	36368003	36368014	cluster:1135	20	-	chr1	36335730	36369181	ENSMUSG00000010453	Kansl3	-	11
chr1	36420044	36420046	cluster:1136	7	-	chr1	36419871	36445271	ENSMUSG00000001143	Lman2l	-	2
chr1	36421409	36421412	cluster:1137	10	-	chr1	36419871	36445271	ENSMUSG00000001143	Lman2l	-	3
chr1	36423322	36423333	cluster:1138	13	-	chr1	36419871	36445271	ENSMUSG00000001143	Lman2l	-	11
chr1	36424626	36424638	cluster:1140	21	-	chr1	36419871	36445271	ENSMUSG00000001143	Lman2l	-	12
chr1	36428117	36428120	cluster:1142	9	-	chr1	36419871	36445271	ENSMUSG00000001143	Lman2l	-	3
chr1	36444609	36444617	cluster:1143	8	-	chr1	36419871	36445271	ENSMUSG00000001143	Lman2l	-	8
chr1	36444857	36444869	cluster:1144	13	-	chr1	36419871	36445271	ENSMUSG00000001143	Lman2l	-	12
chr1	36511890	36511895	cluster:1145	26	+	chr1	36511867	36528237	ENSMUSG00000001138	Cnnm3	+	5
chr1	36511912	36511939	cluster:1146	45	+	chr1	36511867	36528237	ENSMUSG00000001138	Cnnm3	+	27
chr1	36511959	36511969	cluster:1147	44	+	chr1	36511867	36528237	ENSMUSG00000001138	Cnnm3	+	10
chr1	36511983	36511989	cluster:1148	43	+	chr1	36511867	36528237	ENSMUSG00000001138	Cnnm3	+	6
chr1	36512015	36512033	cluster:1149	31	+	chr1	36511867	36528237	ENSMUSG00000001138	Cnnm3	+	18
chr1	36512089	36512110	cluster:1150	87	+	chr1	36511867	36528237	ENSMUSG00000001138	Cnnm3	+	21
chr1	36512123	36512138	cluster:1151	56	+	chr1	36511867	36528237	ENSMUSG00000001138	Cnnm3	+	15
chr1	36512178	36512186	cluster:1152	22	+	chr1	36511867	36528237	ENSMUSG00000001138	Cnnm3	+	8
chr1	36512235	36512244	cluster:1153	13	+	chr1	36511867	36528237	ENSMUSG00000001138	Cnnm3	+	9
chr1	36512445	36512447	cluster:1154	20	+	chr1	36511867	36528237	ENSMUSG00000001138	Cnnm3	+	2
chr1	36512523	36512527	cluster:1155	15	+	chr1	36511867	36528237	ENSMUSG00000001138	Cnnm3	+	4
chr1	36512566	36512568	cluster:1156	26	+	chr1	36511867	36528237	ENSMUSG00000001138	Cnnm3	+	2
chr1	36512621	36512628	cluster:1157	26	+	chr1	36511867	36528237	ENSMUSG00000001138	Cnnm3	+	7
chr1	36512692	36512700	cluster:1158	42	+	chr1	36511867	36528237	ENSMUSG00000001138	Cnnm3	+	8
chr1	36512719	36512726	cluster:1159	36	+	chr1	36511867	36528237	ENSMUSG00000001138	Cnnm3	+	7
chr1	36512773	36512793	cluster:1160	39	+	chr1	36511867	36528237	ENSMUSG00000001138	Cnnm3	+	20
chr1	36512828	36512831	cluster:1161	28	+	chr1	36511867	36528237	ENSMUSG00000001138	Cnnm3	+	3
chr1	36512864	36512882	cluster:1162	28	+	chr1	36511867	36528237	ENSMUSG00000001138	Cnnm3	+	18
chr1	36512899	36512903	cluster:1163	34	+	chr1	36511867	36528237	ENSMUSG00000001138	Cnnm3	+	4
chr1	36512965	36512982	cluster:1164	17	+	chr1	36511867	36528237	ENSMUSG00000001138	Cnnm3	+	17
chr1	36513002	36513011	cluster:1165	45	+	chr1	36511867	36528237	ENSMUSG00000001138	Cnnm3	+	9
chr1	36513025	36513056	cluster:1166	53	+	chr1	36511867	36528237	ENSMUSG00000001138	Cnnm3	+	31
chr1	36513090	36513131	cluster:1167	51	+	chr1	36511867	36528237	ENSMUSG00000001138	Cnnm3	+	41
chr1	36513169	36513209	cluster:1168	41	+	chr1	36511867	36528237	ENSMUSG00000001138	Cnnm3	+	40
chr1	36513240	36513292	cluster:1169	86	+	chr1	36511867	36528237	ENSMUSG00000001138	Cnnm3	+	52
chr1	36513550	36513552	cluster:1170	10	+	chr1	36511867	36528237	ENSMUSG00000001138	Cnnm3	+	2
chr1	36513600	36513610	cluster:1171	16	+	chr1	36511867	36528237	ENSMUSG00000001138	Cnnm3	+	10
chr1	36514016	36514025	cluster:1172	13	+	chr1	36511867	36528237	ENSMUSG00000001138	Cnnm3	+	9
chr1	36515724	36515727	cluster:1173	11	+	chr1	36511867	36528237	ENSMUSG00000001138	Cnnm3	+	3
chr1	36519515	36519522	cluster:1176	8	+	chr1	36511867	36528237	ENSMUSG00000001138	Cnnm3	+	7
chr1	36520146	36520150	cluster:1177	21	+	chr1	36511867	36528237	ENSMUSG00000001138	Cnnm3	+	4
chr1	36521220	36521225	cluster:1178	18	+	chr1	36511867	36528237	ENSMUSG00000001138	Cnnm3	+	5
chr1	36521368	36521378	cluster:1179	10	+	chr1	36511867	36528237	ENSMUSG00000001138	Cnnm3	+	10
chr1	36525575	36525577	cluster:1181	12	+	chr1	36511867	36528237	ENSMUSG00000001138	Cnnm3	+	2
chr1	36590792	36590794	cluster:1182	7	-	chr1	36562692	36683183	ENSMUSG00000046337	Fam178b	-	2
chr1	36661016	36661021	cluster:1183	9	-	chr1	36562692	36683183	ENSMUSG00000046337	Fam178b	-	5
chr1	36691979	36691982	cluster:1184	11	+	chr1	36691484	36693681	ENSMUSG00000061518	Cox5b	+	3
chr1	36699987	36699993	cluster:1185	12	-	chr1	36698114	36714422	ENSMUSG00000037351	Actr1b	-	6
chr1	36701585	36701589	cluster:1186	10	-	chr1	36698114	36714422	ENSMUSG00000037351	Actr1b	-	4
chr1	36701613	36701624	cluster:1187	26	-	chr1	36698114	36714422	ENSMUSG00000037351	Actr1b	-	11
chr1	36702084	36702087	cluster:1188	21	-	chr1	36698114	36714422	ENSMUSG00000037351	Actr1b	-	3
chr1	36702651	36702656	cluster:1189	12	-	chr1	36698114	36714422	ENSMUSG00000037351	Actr1b	-	5
chr1	36706919	36706921	cluster:1190	9	-	chr1	36698114	36714422	ENSMUSG00000037351	Actr1b	-	2
chr1	36709837	36709841	cluster:1191	11	-	chr1	36698114	36714422	ENSMUSG00000037351	Actr1b	-	4
chr1	36792371	36792374	cluster:1192	12	-	chr1	36792191	36943666	ENSMUSG00000026116	Tmem131	-	3
chr1	36792460	36792466	cluster:1193	29	-	chr1	36792191	36943666	ENSMUSG00000026116	Tmem131	-	6
chr1	36792529	36792542	cluster:1194	16	-	chr1	36792191	36943666	ENSMUSG00000026116	Tmem131	-	13
chr1	36792562	36792566	cluster:1195	14	-	chr1	36792191	36943666	ENSMUSG00000026116	Tmem131	-	4
chr1	36792667	36792709	cluster:1196	41	-	chr1	36792191	36943666	ENSMUSG00000026116	Tmem131	-	42
chr1	36792743	36792746	cluster:1197	8	-	chr1	36792191	36943666	ENSMUSG00000026116	Tmem131	-	3
chr1	36792867	36792876	cluster:1198	14	-	chr1	36792191	36943666	ENSMUSG00000026116	Tmem131	-	9
chr1	36793118	36793122	cluster:1199	21	-	chr1	36792191	36943666	ENSMUSG00000026116	Tmem131	-	4
chr1	36793190	36793205	cluster:1200	12	-	chr1	36792191	36943666	ENSMUSG00000026116	Tmem131	-	15
chr1	36793338	36793340	cluster:1201	8	-	chr1	36792191	36943666	ENSMUSG00000026116	Tmem131	-	2
chr1	36794721	36794728	cluster:1202	16	-	chr1	36792191	36943666	ENSMUSG00000026116	Tmem131	-	7
chr1	36794837	36794856	cluster:1203	20	-	chr1	36792191	36943666	ENSMUSG00000026116	Tmem131	-	19
chr1	36795153	36795156	cluster:1204	20	-	chr1	36792191	36943666	ENSMUSG00000026116	Tmem131	-	3
chr1	36795169	36795176	cluster:1205	21	-	chr1	36792191	36943666	ENSMUSG00000026116	Tmem131	-	7
chr1	36795206	36795215	cluster:1206	10	-	chr1	36792191	36943666	ENSMUSG00000026116	Tmem131	-	9
chr1	36795630	36795640	cluster:1207	11	-	chr1	36792191	36943666	ENSMUSG00000026116	Tmem131	-	10
chr1	36795759	36795763	cluster:1208	17	-	chr1	36792191	36943666	ENSMUSG00000026116	Tmem131	-	4
chr1	36796189	36796191	cluster:1210	30	-	chr1	36792191	36943666	ENSMUSG00000026116	Tmem131	-	2
chr1	36796270	36796274	cluster:1211	16	-	chr1	36792191	36943666	ENSMUSG00000026116	Tmem131	-	4
chr1	36796416	36796423	cluster:1212	13	-	chr1	36792191	36943666	ENSMUSG00000026116	Tmem131	-	7
chr1	36796732	36796734	cluster:1213	9	-	chr1	36792191	36943666	ENSMUSG00000026116	Tmem131	-	2
chr1	36796799	36796813	cluster:1214	13	-	chr1	36792191	36943666	ENSMUSG00000026116	Tmem131	-	14
chr1	36797212	36797219	cluster:1215	9	-	chr1	36792191	36943666	ENSMUSG00000026116	Tmem131	-	7
chr1	36797410	36797415	cluster:1216	15	-	chr1	36792191	36943666	ENSMUSG00000026116	Tmem131	-	5
chr1	36797813	36797818	cluster:1218	11	-	chr1	36792191	36943666	ENSMUSG00000026116	Tmem131	-	5
chr1	36797863	36797865	cluster:1219	13	-	chr1	36792191	36943666	ENSMUSG00000026116	Tmem131	-	2
chr1	36798466	36798468	cluster:1220	16	-	chr1	36792191	36943666	ENSMUSG00000026116	Tmem131	-	2
chr1	36798532	36798539	cluster:1221	11	-	chr1	36792191	36943666	ENSMUSG00000026116	Tmem131	-	7
chr1	36798703	36798714	cluster:1222	15	-	chr1	36792191	36943666	ENSMUSG00000026116	Tmem131	-	11
chr1	36798989	36798993	cluster:1223	9	-	chr1	36792191	36943666	ENSMUSG00000026116	Tmem131	-	4
chr1	36799324	36799344	cluster:1224	39	-	chr1	36792191	36943666	ENSMUSG00000026116	Tmem131	-	20
chr1	36799358	36799377	cluster:1225	34	-	chr1	36792191	36943666	ENSMUSG00000026116	Tmem131	-	19
chr1	36799395	36799397	cluster:1226	32	-	chr1	36792191	36943666	ENSMUSG00000026116	Tmem131	-	2
chr1	36799532	36799539	cluster:1227	13	-	chr1	36792191	36943666	ENSMUSG00000026116	Tmem131	-	7
chr1	36799577	36799580	cluster:1228	11	-	chr1	36792191	36943666	ENSMUSG00000026116	Tmem131	-	3
chr1	36800111	36800120	cluster:1229	20	-	chr1	36792191	36943666	ENSMUSG00000026116	Tmem131	-	9
chr1	36800192	36800194	cluster:1230	7	-	chr1	36792191	36943666	ENSMUSG00000026116	Tmem131	-	2
chr1	36800370	36800372	cluster:1231	11	-	chr1	36792191	36943666	ENSMUSG00000026116	Tmem131	-	2
chr1	36800675	36800681	cluster:1232	14	-	chr1	36792191	36943666	ENSMUSG00000026116	Tmem131	-	6
chr1	36800763	36800765	cluster:1233	7	-	chr1	36792191	36943666	ENSMUSG00000026116	Tmem131	-	2
chr1	36800993	36800997	cluster:1234	21	-	chr1	36792191	36943666	ENSMUSG00000026116	Tmem131	-	4
chr1	36807895	36807897	cluster:1235	13	-	chr1	36792191	36943666	ENSMUSG00000026116	Tmem131	-	2
chr1	36807915	36807929	cluster:1236	108	-	chr1	36792191	36943666	ENSMUSG00000026116	Tmem131	-	14
chr1	36807955	36807965	cluster:1237	90	-	chr1	36792191	36943666	ENSMUSG00000026116	Tmem131	-	10
chr1	36808026	36808044	cluster:1238	26	-	chr1	36792191	36943666	ENSMUSG00000026116	Tmem131	-	18
chr1	36808065	36808075	cluster:1239	11	-	chr1	36792191	36943666	ENSMUSG00000026116	Tmem131	-	10
chr1	36808247	36808269	cluster:1240	17	-	chr1	36792191	36943666	ENSMUSG00000026116	Tmem131	-	22
chr1	36808281	36808288	cluster:1241	18	-	chr1	36792191	36943666	ENSMUSG00000026116	Tmem131	-	7
chr1	36808301	36808308	cluster:1242	32	-	chr1	36792191	36943666	ENSMUSG00000026116	Tmem131	-	7
chr1	36808375	36808380	cluster:1243	20	-	chr1	36792191	36943666	ENSMUSG00000026116	Tmem131	-	5
chr1	36808421	36808450	cluster:1244	61	-	chr1	36792191	36943666	ENSMUSG00000026116	Tmem131	-	29
chr1	36808465	36808494	cluster:1245	73	-	chr1	36792191	36943666	ENSMUSG00000026116	Tmem131	-	29
chr1	36808526	36808539	cluster:1246	37	-	chr1	36792191	36943666	ENSMUSG00000026116	Tmem131	-	13
chr1	36808550	36808563	cluster:1247	37	-	chr1	36792191	36943666	ENSMUSG00000026116	Tmem131	-	13
chr1	36808589	36808593	cluster:1248	15	-	chr1	36792191	36943666	ENSMUSG00000026116	Tmem131	-	4
chr1	36808634	36808636	cluster:1249	8	-	chr1	36792191	36943666	ENSMUSG00000026116	Tmem131	-	2
chr1	36808793	36808798	cluster:1250	12	-	chr1	36792191	36943666	ENSMUSG00000026116	Tmem131	-	5
chr1	36808816	36808821	cluster:1251	13	-	chr1	36792191	36943666	ENSMUSG00000026116	Tmem131	-	5
chr1	36808840	36808849	cluster:1252	32	-	chr1	36792191	36943666	ENSMUSG00000026116	Tmem131	-	9
chr1	36808860	36808867	cluster:1253	31	-	chr1	36792191	36943666	ENSMUSG00000026116	Tmem131	-	7
chr1	36808884	36808894	cluster:1254	36	-	chr1	36792191	36943666	ENSMUSG00000026116	Tmem131	-	10
chr1	36809057	36809060	cluster:1256	8	-	chr1	36792191	36943666	ENSMUSG00000026116	Tmem131	-	3
chr1	36810356	36810368	cluster:1258	17	-	chr1	36792191	36943666	ENSMUSG00000026116	Tmem131	-	12
chr1	36810389	36810396	cluster:1259	18	-	chr1	36792191	36943666	ENSMUSG00000026116	Tmem131	-	7
chr1	36810450	36810457	cluster:1260	19	-	chr1	36792191	36943666	ENSMUSG00000026116	Tmem131	-	7
chr1	36811060	36811068	cluster:1261	9	-	chr1	36792191	36943666	ENSMUSG00000026116	Tmem131	-	8
chr1	36811095	36811108	cluster:1262	17	-	chr1	36792191	36943666	ENSMUSG00000026116	Tmem131	-	13
chr1	36811447	36811472	cluster:1263	39	-	chr1	36792191	36943666	ENSMUSG00000026116	Tmem131	-	25
chr1	36811523	36811587	cluster:1264	87	-	chr1	36792191	36943666	ENSMUSG00000026116	Tmem131	-	64
chr1	36812207	36812218	cluster:1265	35	-	chr1	36792191	36943666	ENSMUSG00000026116	Tmem131	-	11
chr1	36812590	36812599	cluster:1266	10	-	chr1	36792191	36943666	ENSMUSG00000026116	Tmem131	-	9
chr1	36812632	36812678	cluster:1267	93	-	chr1	36792191	36943666	ENSMUSG00000026116	Tmem131	-	46
chr1	36813012	36813018	cluster:1268	8	-	chr1	36792191	36943666	ENSMUSG00000026116	Tmem131	-	6
chr1	36814639	36814643	cluster:1269	9	-	chr1	36792191	36943666	ENSMUSG00000026116	Tmem131	-	4
chr1	36814919	36814922	cluster:1270	11	-	chr1	36792191	36943666	ENSMUSG00000026116	Tmem131	-	3
chr1	36815797	36815802	cluster:1271	17	-	chr1	36792191	36943666	ENSMUSG00000026116	Tmem131	-	5
chr1	36815817	36815822	cluster:1272	19	-	chr1	36792191	36943666	ENSMUSG00000026116	Tmem131	-	5
chr1	36818673	36818681	cluster:1273	9	-	chr1	36792191	36943666	ENSMUSG00000026116	Tmem131	-	8
chr1	36818900	36818905	cluster:1274	14	-	chr1	36792191	36943666	ENSMUSG00000026116	Tmem131	-	5
chr1	36818916	36818918	cluster:1275	15	-	chr1	36792191	36943666	ENSMUSG00000026116	Tmem131	-	2
chr1	36818952	36818956	cluster:1276	13	-	chr1	36792191	36943666	ENSMUSG00000026116	Tmem131	-	4
chr1	36819142	36819146	cluster:1278	22	-	chr1	36792191	36943666	ENSMUSG00000026116	Tmem131	-	4
chr1	36819171	36819190	cluster:1279	26	-	chr1	36792191	36943666	ENSMUSG00000026116	Tmem131	-	19
chr1	36819511	36819514	cluster:1280	10	-	chr1	36792191	36943666	ENSMUSG00000026116	Tmem131	-	3
chr1	36823082	36823086	cluster:1282	13	-	chr1	36792191	36943666	ENSMUSG00000026116	Tmem131	-	4
chr1	36823290	36823293	cluster:1283	16	-	chr1	36792191	36943666	ENSMUSG00000026116	Tmem131	-	3
chr1	36823632	36823638	cluster:1284	15	-	chr1	36792191	36943666	ENSMUSG00000026116	Tmem131	-	6
chr1	36824619	36824624	cluster:1285	16	-	chr1	36792191	36943666	ENSMUSG00000026116	Tmem131	-	5
chr1	36824775	36824777	cluster:1286	15	-	chr1	36792191	36943666	ENSMUSG00000026116	Tmem131	-	2
chr1	36824963	36824971	cluster:1287	8	-	chr1	36792191	36943666	ENSMUSG00000026116	Tmem131	-	8
chr1	36825245	36825253	cluster:1288	18	-	chr1	36792191	36943666	ENSMUSG00000026116	Tmem131	-	8
chr1	36825359	36825363	cluster:1289	20	-	chr1	36792191	36943666	ENSMUSG00000026116	Tmem131	-	4
chr1	36825448	36825459	cluster:1290	19	-	chr1	36792191	36943666	ENSMUSG00000026116	Tmem131	-	11
chr1	36825492	36825498	cluster:1291	27	-	chr1	36792191	36943666	ENSMUSG00000026116	Tmem131	-	6
chr1	36825664	36825673	cluster:1292	20	-	chr1	36792191	36943666	ENSMUSG00000026116	Tmem131	-	9
chr1	36825690	36825699	cluster:1293	24	-	chr1	36792191	36943666	ENSMUSG00000026116	Tmem131	-	9
chr1	36825864	36825868	cluster:1294	18	-	chr1	36792191	36943666	ENSMUSG00000026116	Tmem131	-	4
chr1	36826220	36826226	cluster:1297	21	-	chr1	36792191	36943666	ENSMUSG00000026116	Tmem131	-	6
chr1	36826278	36826289	cluster:1298	22	-	chr1	36792191	36943666	ENSMUSG00000026116	Tmem131	-	11
chr1	36827015	36827021	cluster:1299	22	-	chr1	36792191	36943666	ENSMUSG00000026116	Tmem131	-	6
chr1	36827041	36827048	cluster:1300	44	-	chr1	36792191	36943666	ENSMUSG00000026116	Tmem131	-	7
chr1	36827070	36827073	cluster:1301	43	-	chr1	36792191	36943666	ENSMUSG00000026116	Tmem131	-	3
chr1	36827088	36827098	cluster:1302	49	-	chr1	36792191	36943666	ENSMUSG00000026116	Tmem131	-	10
chr1	36827111	36827113	cluster:1303	44	-	chr1	36792191	36943666	ENSMUSG00000026116	Tmem131	-	2
chr1	36827152	36827164	cluster:1304	17	-	chr1	36792191	36943666	ENSMUSG00000026116	Tmem131	-	12
chr1	36827189	36827193	cluster:1305	13	-	chr1	36792191	36943666	ENSMUSG00000026116	Tmem131	-	4
chr1	36827288	36827296	cluster:1306	21	-	chr1	36792191	36943666	ENSMUSG00000026116	Tmem131	-	8
chr1	36827316	36827338	cluster:1307	40	-	chr1	36792191	36943666	ENSMUSG00000026116	Tmem131	-	22
chr1	36827377	36827382	cluster:1308	13	-	chr1	36792191	36943666	ENSMUSG00000026116	Tmem131	-	5
chr1	36828103	36828106	cluster:1309	11	-	chr1	36792191	36943666	ENSMUSG00000026116	Tmem131	-	3
chr1	36828925	36828929	cluster:1310	8	-	chr1	36792191	36943666	ENSMUSG00000026116	Tmem131	-	4
chr1	36829571	36829577	cluster:1311	15	-	chr1	36792191	36943666	ENSMUSG00000026116	Tmem131	-	6
chr1	36833828	36833830	cluster:1312	6	-	chr1	36792191	36943666	ENSMUSG00000026116	Tmem131	-	2
chr1	36834625	36834644	cluster:1313	26	-	chr1	36792191	36943666	ENSMUSG00000026116	Tmem131	-	19
chr1	36834659	36834662	cluster:1314	25	-	chr1	36792191	36943666	ENSMUSG00000026116	Tmem131	-	3
chr1	36834782	36834793	cluster:1316	31	-	chr1	36792191	36943666	ENSMUSG00000026116	Tmem131	-	11
chr1	36834828	36834852	cluster:1317	42	-	chr1	36792191	36943666	ENSMUSG00000026116	Tmem131	-	24
chr1	36834863	36834868	cluster:1318	28	-	chr1	36792191	36943666	ENSMUSG00000026116	Tmem131	-	5
chr1	36834892	36834900	cluster:1319	14	-	chr1	36792191	36943666	ENSMUSG00000026116	Tmem131	-	8
chr1	36840420	36840430	cluster:1321	17	-	chr1	36792191	36943666	ENSMUSG00000026116	Tmem131	-	10
chr1	36840482	36840494	cluster:1322	15	-	chr1	36792191	36943666	ENSMUSG00000026116	Tmem131	-	12
chr1	36841629	36841635	cluster:1323	12	-	chr1	36792191	36943666	ENSMUSG00000026116	Tmem131	-	6
chr1	36846292	36846294	cluster:1325	7	-	chr1	36792191	36943666	ENSMUSG00000026116	Tmem131	-	2
chr1	36854847	36854906	cluster:1326	121	-	chr1	36792191	36943666	ENSMUSG00000026116	Tmem131	-	59
chr1	36854926	36854936	cluster:1327	45	-	chr1	36792191	36943666	ENSMUSG00000026116	Tmem131	-	10
chr1	36855077	36855087	cluster:1328	13	-	chr1	36792191	36943666	ENSMUSG00000026116	Tmem131	-	10
chr1	36856881	36856883	cluster:1331	12	-	chr1	36792191	36943666	ENSMUSG00000026116	Tmem131	-	2
chr1	36863691	36863693	cluster:1332	8	-	chr1	36792191	36943666	ENSMUSG00000026116	Tmem131	-	2
chr1	36865160	36865171	cluster:1333	11	-	chr1	36792191	36943666	ENSMUSG00000026116	Tmem131	-	11
chr1	36865679	36865702	cluster:1334	18	-	chr1	36792191	36943666	ENSMUSG00000026116	Tmem131	-	23
chr1	36865771	36865773	cluster:1335	12	-	chr1	36792191	36943666	ENSMUSG00000026116	Tmem131	-	2
chr1	36865802	36865804	cluster:1336	9	-	chr1	36792191	36943666	ENSMUSG00000026116	Tmem131	-	2
chr1	36865872	36865875	cluster:1337	13	-	chr1	36792191	36943666	ENSMUSG00000026116	Tmem131	-	3
chr1	36866339	36866341	cluster:1338	7	-	chr1	36792191	36943666	ENSMUSG00000026116	Tmem131	-	2
chr1	36866384	36866397	cluster:1339	17	-	chr1	36792191	36943666	ENSMUSG00000026116	Tmem131	-	13
chr1	36867538	36867541	cluster:1340	12	-	chr1	36792191	36943666	ENSMUSG00000026116	Tmem131	-	3
chr1	36867552	36867558	cluster:1341	15	-	chr1	36792191	36943666	ENSMUSG00000026116	Tmem131	-	6
chr1	36868015	36868023	cluster:1343	17	-	chr1	36792191	36943666	ENSMUSG00000026116	Tmem131	-	8
chr1	36868055	36868057	cluster:1344	11	-	chr1	36792191	36943666	ENSMUSG00000026116	Tmem131	-	2
chr1	36868221	36868237	cluster:1346	17	-	chr1	36792191	36943666	ENSMUSG00000026116	Tmem131	-	16
chr1	36868330	36868334	cluster:1347	14	-	chr1	36792191	36943666	ENSMUSG00000026116	Tmem131	-	4
chr1	36868796	36868806	cluster:1348	14	-	chr1	36792191	36943666	ENSMUSG00000026116	Tmem131	-	10
chr1	36868879	36868881	cluster:1349	6	-	chr1	36792191	36943666	ENSMUSG00000026116	Tmem131	-	2
chr1	36869078	36869081	cluster:1350	13	-	chr1	36792191	36943666	ENSMUSG00000026116	Tmem131	-	3
chr1	36871501	36871503	cluster:1351	9	-	chr1	36792191	36943666	ENSMUSG00000026116	Tmem131	-	2
chr1	36872542	36872549	cluster:1352	32	-	chr1	36792191	36943666	ENSMUSG00000026116	Tmem131	-	7
chr1	36872569	36872589	cluster:1353	30	-	chr1	36792191	36943666	ENSMUSG00000026116	Tmem131	-	20
chr1	36874564	36874566	cluster:1354	7	-	chr1	36792191	36943666	ENSMUSG00000026116	Tmem131	-	2
chr1	36918021	36918027	cluster:1357	8	-	chr1	36792191	36943666	ENSMUSG00000026116	Tmem131	-	6
chr1	36929885	36929890	cluster:1358	13	-	chr1	36792191	36943666	ENSMUSG00000026116	Tmem131	-	5
chr1	36936498	36936502	cluster:1359	7	-	chr1	36792191	36943666	ENSMUSG00000026116	Tmem131	-	4
chr1	36937667	36937675	cluster:1360	18	-	chr1	36792191	36943666	ENSMUSG00000026116	Tmem131	-	8
chr1	36938699	36938705	cluster:1362	18	-	chr1	36792191	36943666	ENSMUSG00000026116	Tmem131	-	6
chr1	36939393	36939400	cluster:1364	9	-	chr1	36792191	36943666	ENSMUSG00000026116	Tmem131	-	7
chr1	36939570	36939572	cluster:1366	13	-	chr1	36792191	36943666	ENSMUSG00000026116	Tmem131	-	2
chr1	36939607	36939616	cluster:1367	20	-	chr1	36792191	36943666	ENSMUSG00000026116	Tmem131	-	9
chr1	37418322	37418335	cluster:1368	17	-	chr1	37417084	37430103	ENSMUSG00000026112	Coa5	-	13
chr1	37419883	37419885	cluster:1369	12	-	chr1	37417084	37430103	ENSMUSG00000026112	Coa5	-	2
chr1	37428400	37428402	cluster:1370	8	-	chr1	37417084	37430103	ENSMUSG00000026112	Coa5	-	2
chr1	37430233	37430237	cluster:1371	10	+	chr1	37430139	37439124	ENSMUSG00000026111	Unc50	+	4
chr1	37430891	37430903	cluster:1372	9	+	chr1	37430139	37439124	ENSMUSG00000026111	Unc50	+	12
chr1	37431416	37431418	cluster:1373	18	+	chr1	37430139	37439124	ENSMUSG00000026111	Unc50	+	2
chr1	37431464	37431494	cluster:1374	19	+	chr1	37430139	37439124	ENSMUSG00000026111	Unc50	+	30
chr1	37432623	37432628	cluster:1375	10	+	chr1	37430139	37439124	ENSMUSG00000026111	Unc50	+	5
chr1	37536201	37536213	cluster:1376	8	-	chr1	37439340	37541016	ENSMUSG00000026110	Mgat4a	-	12
chr1	37536237	37536245	cluster:1377	20	-	chr1	37439340	37541016	ENSMUSG00000026110	Mgat4a	-	8
chr1	37875559	37875561	cluster:1378	10	+	chr1	37871738	37876228	ENSMUSG00000037216	Lipt1	+	2
chr1	37879295	37879301	cluster:1379	9	-	chr1	37874801	37890411	ENSMUSG00000026088	Mitd1	-	6
chr1	37885233	37885243	cluster:1381	7	-	chr1	37874801	37890411	ENSMUSG00000026088	Mitd1	-	10
chr1	37990206	37990216	cluster:1382	19	-	chr1	37985189	37997893	ENSMUSG00000058407	Txndc9	-	10
chr1	37995472	37995475	cluster:1383	18	-	chr1	37985189	37997893	ENSMUSG00000058407	Txndc9	-	3
chr1	37997146	37997151	cluster:1384	10	-	chr1	37985189	37997893	ENSMUSG00000058407	Txndc9	-	5
chr1	37998127	37998130	cluster:1385	39	+	chr1	37998010	38055579	ENSMUSG00000026083	Eif5b	+	3
chr1	37998148	37998195	cluster:1386	55	+	chr1	37998010	38055579	ENSMUSG00000026083	Eif5b	+	47
chr1	37998210	37998255	cluster:1387	87	+	chr1	37998010	38055579	ENSMUSG00000026083	Eif5b	+	45
chr1	37998266	37998289	cluster:1388	82	+	chr1	37998010	38055579	ENSMUSG00000026083	Eif5b	+	23
chr1	37998303	37998317	cluster:1389	76	+	chr1	37998010	38055579	ENSMUSG00000026083	Eif5b	+	14
chr1	38017817	38017832	cluster:1390	32	+	chr1	37998010	38055579	ENSMUSG00000026083	Eif5b	+	15
chr1	38017876	38017890	cluster:1393	25	+	chr1	37998010	38055579	ENSMUSG00000026083	Eif5b	+	14
chr1	38018022	38018049	cluster:1394	46	+	chr1	37998010	38055579	ENSMUSG00000026083	Eif5b	+	27
chr1	38018075	38018077	cluster:1395	46	+	chr1	37998010	38055579	ENSMUSG00000026083	Eif5b	+	2
chr1	38018091	38018095	cluster:1396	39	+	chr1	37998010	38055579	ENSMUSG00000026083	Eif5b	+	4
chr1	38018864	38018867	cluster:1397	44	+	chr1	37998010	38055579	ENSMUSG00000026083	Eif5b	+	3
chr1	38018882	38018904	cluster:1398	54	+	chr1	37998010	38055579	ENSMUSG00000026083	Eif5b	+	22
chr1	38018935	38018959	cluster:1399	58	+	chr1	37998010	38055579	ENSMUSG00000026083	Eif5b	+	24
chr1	38018973	38018982	cluster:1400	61	+	chr1	37998010	38055579	ENSMUSG00000026083	Eif5b	+	9
chr1	38019008	38019012	cluster:1401	46	+	chr1	37998010	38055579	ENSMUSG00000026083	Eif5b	+	4
chr1	38019025	38019033	cluster:1402	28	+	chr1	37998010	38055579	ENSMUSG00000026083	Eif5b	+	8
chr1	38019044	38019051	cluster:1403	81	+	chr1	37998010	38055579	ENSMUSG00000026083	Eif5b	+	7
chr1	38019099	38019163	cluster:1404	101	+	chr1	37998010	38055579	ENSMUSG00000026083	Eif5b	+	64
chr1	38019175	38019177	cluster:1405	56	+	chr1	37998010	38055579	ENSMUSG00000026083	Eif5b	+	2
chr1	38019189	38019200	cluster:1406	23	+	chr1	37998010	38055579	ENSMUSG00000026083	Eif5b	+	11
chr1	38019267	38019269	cluster:1408	21	+	chr1	37998010	38055579	ENSMUSG00000026083	Eif5b	+	2
chr1	38019288	38019302	cluster:1409	33	+	chr1	37998010	38055579	ENSMUSG00000026083	Eif5b	+	14
chr1	38019419	38019445	cluster:1411	28	+	chr1	37998010	38055579	ENSMUSG00000026083	Eif5b	+	26
chr1	38019501	38019528	cluster:1412	28	+	chr1	37998010	38055579	ENSMUSG00000026083	Eif5b	+	27
chr1	38021578	38021580	cluster:1413	58	+	chr1	37998010	38055579	ENSMUSG00000026083	Eif5b	+	2
chr1	38021592	38021605	cluster:1414	70	+	chr1	37998010	38055579	ENSMUSG00000026083	Eif5b	+	13
chr1	38021616	38021707	cluster:1415	163	+	chr1	37998010	38055579	ENSMUSG00000026083	Eif5b	+	91
chr1	38021718	38021782	cluster:1416	158	+	chr1	37998010	38055579	ENSMUSG00000026083	Eif5b	+	64
chr1	38021796	38021807	cluster:1417	114	+	chr1	37998010	38055579	ENSMUSG00000026083	Eif5b	+	11
chr1	38022167	38022186	cluster:1418	79	+	chr1	37998010	38055579	ENSMUSG00000026083	Eif5b	+	19
chr1	38022219	38022235	cluster:1419	75	+	chr1	37998010	38055579	ENSMUSG00000026083	Eif5b	+	16
chr1	38022251	38022277	cluster:1420	58	+	chr1	37998010	38055579	ENSMUSG00000026083	Eif5b	+	26
chr1	38022294	38022304	cluster:1421	18	+	chr1	37998010	38055579	ENSMUSG00000026083	Eif5b	+	10
chr1	38022653	38022656	cluster:1422	8	+	chr1	37998010	38055579	ENSMUSG00000026083	Eif5b	+	3
chr1	38032298	38032301	cluster:1423	20	+	chr1	37998010	38055579	ENSMUSG00000026083	Eif5b	+	3
chr1	38032321	38032335	cluster:1424	66	+	chr1	37998010	38055579	ENSMUSG00000026083	Eif5b	+	14
chr1	38033076	38033087	cluster:1425	19	+	chr1	37998010	38055579	ENSMUSG00000026083	Eif5b	+	11
chr1	38033118	38033120	cluster:1426	15	+	chr1	37998010	38055579	ENSMUSG00000026083	Eif5b	+	2
chr1	38033398	38033402	cluster:1427	8	+	chr1	37998010	38055579	ENSMUSG00000026083	Eif5b	+	4
chr1	38034039	38034062	cluster:1428	29	+	chr1	37998010	38055579	ENSMUSG00000026083	Eif5b	+	23
chr1	38034076	38034087	cluster:1429	12	+	chr1	37998010	38055579	ENSMUSG00000026083	Eif5b	+	11
chr1	38035998	38036015	cluster:1430	14	+	chr1	37998010	38055579	ENSMUSG00000026083	Eif5b	+	17
chr1	38036078	38036082	cluster:1431	22	+	chr1	37998010	38055579	ENSMUSG00000026083	Eif5b	+	4
chr1	38036096	38036100	cluster:1432	20	+	chr1	37998010	38055579	ENSMUSG00000026083	Eif5b	+	4
chr1	38036141	38036147	cluster:1434	18	+	chr1	37998010	38055579	ENSMUSG00000026083	Eif5b	+	6
chr1	38036168	38036174	cluster:1435	14	+	chr1	37998010	38055579	ENSMUSG00000026083	Eif5b	+	6
chr1	38036207	38036209	cluster:1436	18	+	chr1	37998010	38055579	ENSMUSG00000026083	Eif5b	+	2
chr1	38036223	38036233	cluster:1437	39	+	chr1	37998010	38055579	ENSMUSG00000026083	Eif5b	+	10
chr1	38036245	38036250	cluster:1438	30	+	chr1	37998010	38055579	ENSMUSG00000026083	Eif5b	+	5
chr1	38036266	38036268	cluster:1439	36	+	chr1	37998010	38055579	ENSMUSG00000026083	Eif5b	+	2
chr1	38037200	38037210	cluster:1440	33	+	chr1	37998010	38055579	ENSMUSG00000026083	Eif5b	+	10
chr1	38037232	38037244	cluster:1441	30	+	chr1	37998010	38055579	ENSMUSG00000026083	Eif5b	+	12
chr1	38037255	38037284	cluster:1442	31	+	chr1	37998010	38055579	ENSMUSG00000026083	Eif5b	+	29
chr1	38037298	38037306	cluster:1443	18	+	chr1	37998010	38055579	ENSMUSG00000026083	Eif5b	+	8
chr1	38037584	38037598	cluster:1444	49	+	chr1	37998010	38055579	ENSMUSG00000026083	Eif5b	+	14
chr1	38037612	38037619	cluster:1445	24	+	chr1	37998010	38055579	ENSMUSG00000026083	Eif5b	+	7
chr1	38040713	38040720	cluster:1446	11	+	chr1	37998010	38055579	ENSMUSG00000026083	Eif5b	+	7
chr1	38041734	38041763	cluster:1447	44	+	chr1	37998010	38055579	ENSMUSG00000026083	Eif5b	+	29
chr1	38041831	38041834	cluster:1448	11	+	chr1	37998010	38055579	ENSMUSG00000026083	Eif5b	+	3
chr1	38044749	38044790	cluster:1449	45	+	chr1	37998010	38055579	ENSMUSG00000026083	Eif5b	+	41
chr1	38044812	38044818	cluster:1450	6	+	chr1	37998010	38055579	ENSMUSG00000026083	Eif5b	+	6
chr1	38045761	38045763	cluster:1451	24	+	chr1	37998010	38055579	ENSMUSG00000026083	Eif5b	+	2
chr1	38045777	38045799	cluster:1452	26	+	chr1	37998010	38055579	ENSMUSG00000026083	Eif5b	+	22
chr1	38046737	38046739	cluster:1453	7	+	chr1	37998010	38055579	ENSMUSG00000026083	Eif5b	+	2
chr1	38048854	38048856	cluster:1455	9	+	chr1	37998010	38055579	ENSMUSG00000026083	Eif5b	+	2
chr1	38049018	38049025	cluster:1456	17	+	chr1	37998010	38055579	ENSMUSG00000026083	Eif5b	+	7
chr1	38049176	38049187	cluster:1457	19	+	chr1	37998010	38055579	ENSMUSG00000026083	Eif5b	+	11
chr1	38049238	38049242	cluster:1458	16	+	chr1	37998010	38055579	ENSMUSG00000026083	Eif5b	+	4
chr1	38049288	38049305	cluster:1459	31	+	chr1	37998010	38055579	ENSMUSG00000026083	Eif5b	+	17
chr1	38050215	38050236	cluster:1460	18	+	chr1	37998010	38055579	ENSMUSG00000026083	Eif5b	+	21
chr1	38050250	38050254	cluster:1461	9	+	chr1	37998010	38055579	ENSMUSG00000026083	Eif5b	+	4
chr1	38051647	38051653	cluster:1462	17	+	chr1	37998010	38055579	ENSMUSG00000026083	Eif5b	+	6
chr1	38051709	38051716	cluster:1463	28	+	chr1	37998010	38055579	ENSMUSG00000026083	Eif5b	+	7
chr1	38051738	38051753	cluster:1464	12	+	chr1	37998010	38055579	ENSMUSG00000026083	Eif5b	+	15
chr1	38051930	38051945	cluster:1465	17	+	chr1	37998010	38055579	ENSMUSG00000026083	Eif5b	+	15
chr1	38052840	38052845	cluster:1467	7	+	chr1	37998010	38055579	ENSMUSG00000026083	Eif5b	+	5
chr1	38052876	38052900	cluster:1468	23	-	chr1	38052786	38129801	ENSMUSG00000026082	Rev1	-	24
chr1	38052949	38052955	cluster:1469	12	-	chr1	38052786	38129801	ENSMUSG00000026082	Rev1	-	6
chr1	38052986	38052990	cluster:1470	16	-	chr1	38052786	38129801	ENSMUSG00000026082	Rev1	-	4
chr1	38053185	38053195	cluster:1471	12	-	chr1	38052786	38129801	ENSMUSG00000026082	Rev1	-	10
chr1	38053653	38053669	cluster:1472	16	-	chr1	38052786	38129801	ENSMUSG00000026082	Rev1	-	16
chr1	38054111	38054129	cluster:1473	26	-	chr1	38052786	38129801	ENSMUSG00000026082	Rev1	-	18
chr1	38054392	38054398	cluster:1475	6	-	chr1	38052786	38129801	ENSMUSG00000026082	Rev1	-	6
chr1	38054748	38054752	cluster:1476	14	-	chr1	38052786	38129801	ENSMUSG00000026082	Rev1	-	4
chr1	38055294	38055307	cluster:1477	21	-	chr1	38052786	38129801	ENSMUSG00000026082	Rev1	-	13
chr1	38055366	38055372	cluster:1478	27	-	chr1	38052786	38129801	ENSMUSG00000026082	Rev1	-	6
chr1	38055464	38055477	cluster:1479	25	-	chr1	38052786	38129801	ENSMUSG00000026082	Rev1	-	13
chr1	38056782	38056787	cluster:1480	11	-	chr1	38052786	38129801	ENSMUSG00000026082	Rev1	-	5
chr1	38056827	38056840	cluster:1481	20	-	chr1	38052786	38129801	ENSMUSG00000026082	Rev1	-	13
chr1	38057685	38057692	cluster:1482	16	-	chr1	38052786	38129801	ENSMUSG00000026082	Rev1	-	7
chr1	38059129	38059144	cluster:1483	16	-	chr1	38052786	38129801	ENSMUSG00000026082	Rev1	-	15
chr1	38059155	38059157	cluster:1484	15	-	chr1	38052786	38129801	ENSMUSG00000026082	Rev1	-	2
chr1	38062926	38062938	cluster:1485	22	-	chr1	38052786	38129801	ENSMUSG00000026082	Rev1	-	12
chr1	38063016	38063018	cluster:1486	9	-	chr1	38052786	38129801	ENSMUSG00000026082	Rev1	-	2
chr1	38063087	38063103	cluster:1487	23	-	chr1	38052786	38129801	ENSMUSG00000026082	Rev1	-	16
chr1	38063150	38063152	cluster:1488	9	-	chr1	38052786	38129801	ENSMUSG00000026082	Rev1	-	2
chr1	38063186	38063213	cluster:1489	43	-	chr1	38052786	38129801	ENSMUSG00000026082	Rev1	-	27
chr1	38063292	38063295	cluster:1490	11	-	chr1	38052786	38129801	ENSMUSG00000026082	Rev1	-	3
chr1	38063315	38063325	cluster:1491	16	-	chr1	38052786	38129801	ENSMUSG00000026082	Rev1	-	10
chr1	38063966	38063974	cluster:1492	9	-	chr1	38052786	38129801	ENSMUSG00000026082	Rev1	-	8
chr1	38067609	38067612	cluster:1494	17	-	chr1	38052786	38129801	ENSMUSG00000026082	Rev1	-	3
chr1	38071403	38071407	cluster:1495	33	-	chr1	38052786	38129801	ENSMUSG00000026082	Rev1	-	4
chr1	38071419	38071433	cluster:1496	25	-	chr1	38052786	38129801	ENSMUSG00000026082	Rev1	-	14
chr1	38071483	38071496	cluster:1497	25	-	chr1	38052786	38129801	ENSMUSG00000026082	Rev1	-	13
chr1	38072076	38072080	cluster:1498	7	-	chr1	38052786	38129801	ENSMUSG00000026082	Rev1	-	4
chr1	38074448	38074454	cluster:1499	19	-	chr1	38052786	38129801	ENSMUSG00000026082	Rev1	-	6
chr1	38074535	38074546	cluster:1500	17	-	chr1	38052786	38129801	ENSMUSG00000026082	Rev1	-	11
chr1	38074622	38074625	cluster:1501	15	-	chr1	38052786	38129801	ENSMUSG00000026082	Rev1	-	3
chr1	38074835	38074838	cluster:1503	8	-	chr1	38052786	38129801	ENSMUSG00000026082	Rev1	-	3
chr1	38079159	38079166	cluster:1504	13	-	chr1	38052786	38129801	ENSMUSG00000026082	Rev1	-	7
chr1	38079293	38079305	cluster:1506	13	-	chr1	38052786	38129801	ENSMUSG00000026082	Rev1	-	12
chr1	38079327	38079341	cluster:1507	25	-	chr1	38052786	38129801	ENSMUSG00000026082	Rev1	-	14
chr1	38079376	38079394	cluster:1508	20	-	chr1	38052786	38129801	ENSMUSG00000026082	Rev1	-	18
chr1	38085596	38085605	cluster:1511	16	-	chr1	38052786	38129801	ENSMUSG00000026082	Rev1	-	9
chr1	38086139	38086151	cluster:1512	11	-	chr1	38052786	38129801	ENSMUSG00000026082	Rev1	-	12
chr1	38086569	38086585	cluster:1513	20	-	chr1	38052786	38129801	ENSMUSG00000026082	Rev1	-	16
chr1	38087194	38087196	cluster:1514	10	-	chr1	38052786	38129801	ENSMUSG00000026082	Rev1	-	2
chr1	38087324	38087333	cluster:1515	11	-	chr1	38052786	38129801	ENSMUSG00000026082	Rev1	-	9
chr1	38087409	38087416	cluster:1516	11	-	chr1	38052786	38129801	ENSMUSG00000026082	Rev1	-	7
chr1	38087443	38087446	cluster:1517	8	-	chr1	38052786	38129801	ENSMUSG00000026082	Rev1	-	3
chr1	38087533	38087537	cluster:1518	14	-	chr1	38052786	38129801	ENSMUSG00000026082	Rev1	-	4
chr1	38087706	38087715	cluster:1519	22	-	chr1	38052786	38129801	ENSMUSG00000026082	Rev1	-	9
chr1	38087812	38087821	cluster:1520	20	-	chr1	38052786	38129801	ENSMUSG00000026082	Rev1	-	9
chr1	38087915	38087933	cluster:1521	26	-	chr1	38052786	38129801	ENSMUSG00000026082	Rev1	-	18
chr1	38087949	38087952	cluster:1522	9	-	chr1	38052786	38129801	ENSMUSG00000026082	Rev1	-	3
chr1	38087990	38087992	cluster:1524	26	-	chr1	38052786	38129801	ENSMUSG00000026082	Rev1	-	2
chr1	38088019	38088037	cluster:1525	80	-	chr1	38052786	38129801	ENSMUSG00000026082	Rev1	-	18
chr1	38088053	38088068	cluster:1526	71	-	chr1	38052786	38129801	ENSMUSG00000026082	Rev1	-	15
chr1	38088119	38088141	cluster:1527	52	-	chr1	38052786	38129801	ENSMUSG00000026082	Rev1	-	22
chr1	38088153	38088173	cluster:1528	38	-	chr1	38052786	38129801	ENSMUSG00000026082	Rev1	-	20
chr1	38088187	38088199	cluster:1529	35	-	chr1	38052786	38129801	ENSMUSG00000026082	Rev1	-	12
chr1	38088212	38088223	cluster:1530	62	-	chr1	38052786	38129801	ENSMUSG00000026082	Rev1	-	11
chr1	38088312	38088333	cluster:1531	26	-	chr1	38052786	38129801	ENSMUSG00000026082	Rev1	-	21
chr1	38088404	38088419	cluster:1532	35	-	chr1	38052786	38129801	ENSMUSG00000026082	Rev1	-	15
chr1	38088463	38088472	cluster:1533	22	-	chr1	38052786	38129801	ENSMUSG00000026082	Rev1	-	9
chr1	38088484	38088487	cluster:1534	24	-	chr1	38052786	38129801	ENSMUSG00000026082	Rev1	-	3
chr1	38088503	38088541	cluster:1535	49	-	chr1	38052786	38129801	ENSMUSG00000026082	Rev1	-	38
chr1	38088557	38088563	cluster:1536	51	-	chr1	38052786	38129801	ENSMUSG00000026082	Rev1	-	6
chr1	38088577	38088604	cluster:1537	75	-	chr1	38052786	38129801	ENSMUSG00000026082	Rev1	-	27
chr1	38088620	38088624	cluster:1538	54	-	chr1	38052786	38129801	ENSMUSG00000026082	Rev1	-	4
chr1	38088661	38088664	cluster:1539	11	-	chr1	38052786	38129801	ENSMUSG00000026082	Rev1	-	3
chr1	38088723	38088729	cluster:1540	25	-	chr1	38052786	38129801	ENSMUSG00000026082	Rev1	-	6
chr1	38088757	38088775	cluster:1541	22	-	chr1	38052786	38129801	ENSMUSG00000026082	Rev1	-	18
chr1	38088818	38088833	cluster:1542	20	-	chr1	38052786	38129801	ENSMUSG00000026082	Rev1	-	15
chr1	38092102	38092111	cluster:1544	12	-	chr1	38052786	38129801	ENSMUSG00000026082	Rev1	-	9
chr1	38095692	38095695	cluster:1545	10	-	chr1	38052786	38129801	ENSMUSG00000026082	Rev1	-	3
chr1	38097884	38097890	cluster:1546	12	-	chr1	38052786	38129801	ENSMUSG00000026082	Rev1	-	6
chr1	38098876	38098878	cluster:1547	8	-	chr1	38052786	38129801	ENSMUSG00000026082	Rev1	-	2
chr1	38098925	38098936	cluster:1548	36	-	chr1	38052786	38129801	ENSMUSG00000026082	Rev1	-	11
chr1	38098957	38098965	cluster:1549	21	-	chr1	38052786	38129801	ENSMUSG00000026082	Rev1	-	8
chr1	38099015	38099036	cluster:1550	14	-	chr1	38052786	38129801	ENSMUSG00000026082	Rev1	-	21
chr1	38103731	38103736	cluster:1551	9	-	chr1	38052786	38129801	ENSMUSG00000026082	Rev1	-	5
chr1	38105970	38105980	cluster:1552	16	-	chr1	38052786	38129801	ENSMUSG00000026082	Rev1	-	10
chr1	38107600	38107604	cluster:1553	31	-	chr1	38052786	38129801	ENSMUSG00000026082	Rev1	-	4
chr1	38121939	38121946	cluster:1554	7	-	chr1	38052786	38129801	ENSMUSG00000026082	Rev1	-	7
chr1	38996415	38996423	cluster:1556	19	+	chr1	38985608	38997238	ENSMUSG00000026078	Pdcl3	+	8
chr1	39367910	39367918	cluster:1557	12	+	chr1	39367842	39371911	ENSMUSG00000073702	Rpl31	+	8
chr1	39368367	39368374	cluster:1558	13	+	chr1	39367842	39371911	ENSMUSG00000073702	Rpl31	+	7
chr1	39368450	39368460	cluster:1559	17	+	chr1	39367842	39371911	ENSMUSG00000073702	Rpl31	+	10
chr1	39368591	39368609	cluster:1560	20	+	chr1	39367842	39371911	ENSMUSG00000073702	Rpl31	+	18
chr1	39369675	39369687	cluster:1561	10	+	chr1	39367842	39371911	ENSMUSG00000073702	Rpl31	+	12
chr1	39369874	39369881	cluster:1562	13	+	chr1	39367842	39371911	ENSMUSG00000073702	Rpl31	+	7
chr1	39370204	39370219	cluster:1563	11	+	chr1	39367842	39371911	ENSMUSG00000073702	Rpl31	+	15
chr1	39370472	39370476	cluster:1564	7	+	chr1	39367842	39371911	ENSMUSG00000073702	Rpl31	+	4
chr1	39371072	39371098	cluster:1566	22	+	chr1	39367842	39371911	ENSMUSG00000073702	Rpl31	+	26
chr1	39371412	39371422	cluster:1567	20	+	chr1	39367842	39371911	ENSMUSG00000073702	Rpl31	+	10
chr1	39371512	39371526	cluster:1568	19	+	chr1	39367842	39371911	ENSMUSG00000073702	Rpl31	+	14
chr1	39535882	39535890	cluster:1569	12	+	chr1	39534992	39546889	ENSMUSG00000003135	Cnot11	+	8
chr1	39537449	39537452	cluster:1571	12	+	chr1	39534992	39546889	ENSMUSG00000003135	Cnot11	+	3
chr1	39545095	39545099	cluster:1572	11	+	chr1	39534992	39546889	ENSMUSG00000003135	Cnot11	+	4
chr1	39565203	39565206	cluster:1574	9	-	chr1	39551296	39577405	ENSMUSG00000048234	Rnf149	-	3
chr1	39901228	39901243	cluster:1576	17	+	chr1	39900913	40026310	ENSMUSG00000026074	Map4k4	+	15
chr1	39901520	39901527	cluster:1577	51	+	chr1	39900913	40026310	ENSMUSG00000026074	Map4k4	+	7
chr1	39901727	39901736	cluster:1578	11	+	chr1	39900913	40026310	ENSMUSG00000026074	Map4k4	+	9
chr1	39901758	39901761	cluster:1579	11	+	chr1	39900913	40026310	ENSMUSG00000026074	Map4k4	+	3
chr1	39906791	39906795	cluster:1580	9	+	chr1	39900913	40026310	ENSMUSG00000026074	Map4k4	+	4
chr1	39907171	39907173	cluster:1581	6	+	chr1	39900913	40026310	ENSMUSG00000026074	Map4k4	+	2
chr1	39962186	39962192	cluster:1582	12	+	chr1	39900913	40026310	ENSMUSG00000026074	Map4k4	+	6
chr1	39962216	39962219	cluster:1583	27	+	chr1	39900913	40026310	ENSMUSG00000026074	Map4k4	+	3
chr1	39962273	39962277	cluster:1584	12	+	chr1	39900913	40026310	ENSMUSG00000026074	Map4k4	+	4
chr1	39973988	39973995	cluster:1585	19	+	chr1	39900913	40026310	ENSMUSG00000026074	Map4k4	+	7
chr1	39974007	39974014	cluster:1586	17	+	chr1	39900913	40026310	ENSMUSG00000026074	Map4k4	+	7
chr1	39975717	39975719	cluster:1587	7	+	chr1	39900913	40026310	ENSMUSG00000026074	Map4k4	+	2
chr1	39976710	39976721	cluster:1588	18	+	chr1	39900913	40026310	ENSMUSG00000026074	Map4k4	+	11
chr1	39985213	39985219	cluster:1589	19	+	chr1	39900913	40026310	ENSMUSG00000026074	Map4k4	+	6
chr1	39986632	39986646	cluster:1590	41	+	chr1	39900913	40026310	ENSMUSG00000026074	Map4k4	+	14
chr1	39986668	39986671	cluster:1591	24	+	chr1	39900913	40026310	ENSMUSG00000026074	Map4k4	+	3
chr1	39986755	39986775	cluster:1592	14	+	chr1	39900913	40026310	ENSMUSG00000026074	Map4k4	+	20
chr1	39988979	39988981	cluster:1593	11	+	chr1	39900913	40026310	ENSMUSG00000026074	Map4k4	+	2
chr1	39990090	39990103	cluster:1594	22	+	chr1	39900913	40026310	ENSMUSG00000026074	Map4k4	+	13
chr1	39997052	39997059	cluster:1595	33	+	chr1	39900913	40026310	ENSMUSG00000026074	Map4k4	+	7
chr1	39997100	39997102	cluster:1596	7	+	chr1	39900913	40026310	ENSMUSG00000026074	Map4k4	+	2
chr1	40000695	40000697	cluster:1597	7	+	chr1	39900913	40026310	ENSMUSG00000026074	Map4k4	+	2
chr1	40001686	40001689	cluster:1598	11	+	chr1	39900913	40026310	ENSMUSG00000026074	Map4k4	+	3
chr1	40003870	40003875	cluster:1599	11	+	chr1	39900913	40026310	ENSMUSG00000026074	Map4k4	+	5
chr1	40004165	40004170	cluster:1600	7	+	chr1	39900913	40026310	ENSMUSG00000026074	Map4k4	+	5
chr1	40004410	40004418	cluster:1601	12	+	chr1	39900913	40026310	ENSMUSG00000026074	Map4k4	+	8
chr1	40006786	40006791	cluster:1602	9	+	chr1	39900913	40026310	ENSMUSG00000026074	Map4k4	+	5
chr1	40009830	40009834	cluster:1603	10	+	chr1	39900913	40026310	ENSMUSG00000026074	Map4k4	+	4
chr1	40013718	40013724	cluster:1604	12	+	chr1	39900913	40026310	ENSMUSG00000026074	Map4k4	+	6
chr1	40014129	40014132	cluster:1605	10	+	chr1	39900913	40026310	ENSMUSG00000026074	Map4k4	+	3
chr1	40014163	40014165	cluster:1606	22	+	chr1	39900913	40026310	ENSMUSG00000026074	Map4k4	+	2
chr1	40014651	40014654	cluster:1607	7	+	chr1	39900913	40026310	ENSMUSG00000026074	Map4k4	+	3
chr1	40024383	40024387	cluster:1608	11	+	chr1	39900913	40026310	ENSMUSG00000026074	Map4k4	+	4
chr1	40024880	40024896	cluster:1609	28	+	chr1	39900913	40026310	ENSMUSG00000026074	Map4k4	+	16
chr1	40025203	40025208	cluster:1610	18	+	chr1	39900913	40026310	ENSMUSG00000026074	Map4k4	+	5
chr1	40025375	40025378	cluster:1611	17	+	chr1	39900913	40026310	ENSMUSG00000026074	Map4k4	+	3
chr1	40025664	40025681	cluster:1612	22	+	chr1	39900913	40026310	ENSMUSG00000026074	Map4k4	+	17
chr1	40026210	40026216	cluster:1613	10	+	chr1	39900913	40026310	ENSMUSG00000026074	Map4k4	+	6
chr1	42851281	42851287	cluster:1617	12	+	chr1	42851233	42905683	ENSMUSG00000060679	Mrps9	+	6
chr1	42862481	42862488	cluster:1619	9	+	chr1	42851233	42905683	ENSMUSG00000060679	Mrps9	+	7
chr1	42862505	42862514	cluster:1620	40	+	chr1	42851233	42905683	ENSMUSG00000060679	Mrps9	+	9
chr1	42862549	42862556	cluster:1621	64	+	chr1	42851233	42905683	ENSMUSG00000060679	Mrps9	+	7
chr1	42862570	42862579	cluster:1622	43	+	chr1	42851233	42905683	ENSMUSG00000060679	Mrps9	+	9
chr1	42862604	42862606	cluster:1623	17	+	chr1	42851233	42905683	ENSMUSG00000060679	Mrps9	+	2
chr1	42862639	42862642	cluster:1624	16	+	chr1	42851233	42905683	ENSMUSG00000060679	Mrps9	+	3
chr1	42879771	42879787	cluster:1625	20	+	chr1	42851233	42905683	ENSMUSG00000060679	Mrps9	+	16
chr1	42879906	42879918	cluster:1626	17	+	chr1	42851233	42905683	ENSMUSG00000060679	Mrps9	+	12
chr1	42879970	42879973	cluster:1627	13	+	chr1	42851233	42905683	ENSMUSG00000060679	Mrps9	+	3
chr1	42884212	42884214	cluster:1628	8	+	chr1	42851233	42905683	ENSMUSG00000060679	Mrps9	+	2
chr1	42887735	42887749	cluster:1629	22	+	chr1	42851233	42905683	ENSMUSG00000060679	Mrps9	+	14
chr1	42898165	42898167	cluster:1630	8	+	chr1	42851233	42905683	ENSMUSG00000060679	Mrps9	+	2
chr1	42898225	42898233	cluster:1632	20	+	chr1	42851233	42905683	ENSMUSG00000060679	Mrps9	+	8
chr1	42898334	42898343	cluster:1633	9	+	chr1	42851233	42905683	ENSMUSG00000060679	Mrps9	+	9
chr1	42898469	42898478	cluster:1634	12	+	chr1	42851233	42905683	ENSMUSG00000060679	Mrps9	+	9
chr1	42898530	42898535	cluster:1636	9	+	chr1	42851233	42905683	ENSMUSG00000060679	Mrps9	+	5
chr1	42898969	42898977	cluster:1637	10	+	chr1	42851233	42905683	ENSMUSG00000060679	Mrps9	+	8
chr1	42899118	42899122	cluster:1638	8	+	chr1	42851233	42905683	ENSMUSG00000060679	Mrps9	+	4
chr1	42899709	42899718	cluster:1639	12	+	chr1	42851233	42905683	ENSMUSG00000060679	Mrps9	+	9
chr1	42905594	42905596	cluster:1640	17	+	chr1	42851233	42905683	ENSMUSG00000060679	Mrps9	+	2
chr1	43071527	43071533	cluster:1641	7	-	chr1	43047200	43098637	ENSMUSG00000070939	Tgfbrap1	-	6
chr1	43096919	43096921	cluster:1642	7	-	chr1	43047200	43098637	ENSMUSG00000070939	Tgfbrap1	-	2
chr1	43098359	43098366	cluster:1643	16	-	chr1	43047200	43098637	ENSMUSG00000070939	Tgfbrap1	-	7
chr1	43098462	43098464	cluster:1644	9	-	chr1	43047200	43098637	ENSMUSG00000070939	Tgfbrap1	-	2
chr1	43100771	43100775	cluster:1645	12	+	chr1	43098710	43115947	ENSMUSG00000010290	AI597479	+	4
chr1	43111040	43111045	cluster:1646	12	+	chr1	43098710	43115947	ENSMUSG00000010290	AI597479	+	5
chr1	43111167	43111169	cluster:1647	11	+	chr1	43098710	43115947	ENSMUSG00000010290	AI597479	+	2
chr1	43111184	43111189	cluster:1648	17	+	chr1	43098710	43115947	ENSMUSG00000010290	AI597479	+	5
chr1	43750153	43750158	cluster:1649	19	-	chr1	43746966	43827800	ENSMUSG00000057363	Uxs1	-	5
chr1	43778927	43778939	cluster:1650	38	-	chr1	43746966	43827800	ENSMUSG00000057363	Uxs1	-	12
chr1	43970485	43970488	cluster:1652	9	+	chr1	43933647	44003000	ENSMUSG00000041763	Tpp2	+	3
chr1	43971704	43971718	cluster:1653	16	+	chr1	43933647	44003000	ENSMUSG00000041763	Tpp2	+	14
chr1	43972513	43972517	cluster:1654	8	+	chr1	43933647	44003000	ENSMUSG00000041763	Tpp2	+	4
chr1	43972563	43972566	cluster:1655	12	+	chr1	43933647	44003000	ENSMUSG00000041763	Tpp2	+	3
chr1	43975461	43975478	cluster:1656	19	+	chr1	43933647	44003000	ENSMUSG00000041763	Tpp2	+	17
chr1	43977224	43977227	cluster:1657	7	+	chr1	43933647	44003000	ENSMUSG00000041763	Tpp2	+	3
chr1	43977300	43977312	cluster:1658	16	+	chr1	43933647	44003000	ENSMUSG00000041763	Tpp2	+	12
chr1	43977339	43977348	cluster:1659	14	+	chr1	43933647	44003000	ENSMUSG00000041763	Tpp2	+	9
chr1	43979976	43979981	cluster:1660	10	+	chr1	43933647	44003000	ENSMUSG00000041763	Tpp2	+	5
chr1	43980331	43980333	cluster:1661	10	+	chr1	43933647	44003000	ENSMUSG00000041763	Tpp2	+	2
chr1	43981778	43981796	cluster:1662	22	+	chr1	43933647	44003000	ENSMUSG00000041763	Tpp2	+	18
chr1	43983111	43983123	cluster:1664	10	+	chr1	43933647	44003000	ENSMUSG00000041763	Tpp2	+	12
chr1	43983156	43983175	cluster:1665	59	+	chr1	43933647	44003000	ENSMUSG00000041763	Tpp2	+	19
chr1	43983205	43983219	cluster:1666	21	+	chr1	43933647	44003000	ENSMUSG00000041763	Tpp2	+	14
chr1	43983248	43983250	cluster:1667	13	+	chr1	43933647	44003000	ENSMUSG00000041763	Tpp2	+	2
chr1	43983302	43983314	cluster:1669	20	+	chr1	43933647	44003000	ENSMUSG00000041763	Tpp2	+	12
chr1	43990528	43990539	cluster:1670	13	+	chr1	43933647	44003000	ENSMUSG00000041763	Tpp2	+	11
chr1	43990631	43990640	cluster:1671	19	+	chr1	43933647	44003000	ENSMUSG00000041763	Tpp2	+	9
chr1	43991311	43991313	cluster:1672	16	+	chr1	43933647	44003000	ENSMUSG00000041763	Tpp2	+	2
chr1	43992313	43992315	cluster:1674	6	+	chr1	43933647	44003000	ENSMUSG00000041763	Tpp2	+	2
chr1	43999782	43999794	cluster:1675	12	+	chr1	43933647	44003000	ENSMUSG00000041763	Tpp2	+	12
chr1	43999814	43999822	cluster:1676	9	+	chr1	43933647	44003000	ENSMUSG00000041763	Tpp2	+	8
chr1	44002264	44002269	cluster:1677	9	+	chr1	43933647	44003000	ENSMUSG00000041763	Tpp2	+	5
chr1	44002290	44002302	cluster:1678	11	+	chr1	43933647	44003000	ENSMUSG00000041763	Tpp2	+	12
chr1	44002584	44002587	cluster:1679	10	+	chr1	43933647	44003000	ENSMUSG00000041763	Tpp2	+	3
chr1	44091413	44091415	cluster:1680	12	-	chr1	44086613	44102441	ENSMUSG00000026049	Tex30	-	2
chr1	44106955	44106964	cluster:1681	15	-	chr1	44106546	44118808	ENSMUSG00000026047	Kdelc1	-	9
chr1	44106955	44106964	cluster:1681	15	-	chr1	44091463	44110790	ENSMUSG00000101104	Gm29247	-	9
chr1	44106993	44106999	cluster:1682	10	-	chr1	44106546	44118808	ENSMUSG00000026047	Kdelc1	-	6
chr1	44106993	44106999	cluster:1682	10	-	chr1	44091463	44110790	ENSMUSG00000101104	Gm29247	-	6
chr1	44112649	44112668	cluster:1684	23	-	chr1	44106546	44118808	ENSMUSG00000026047	Kdelc1	-	19
chr1	44112708	44112737	cluster:1685	44	-	chr1	44106546	44118808	ENSMUSG00000026047	Kdelc1	-	29
chr1	44112749	44112751	cluster:1686	28	-	chr1	44106546	44118808	ENSMUSG00000026047	Kdelc1	-	2
chr1	44112863	44112878	cluster:1687	16	-	chr1	44106546	44118808	ENSMUSG00000026047	Kdelc1	-	15
chr1	44113082	44113087	cluster:1688	24	-	chr1	44106546	44118808	ENSMUSG00000026047	Kdelc1	-	5
chr1	44113131	44113139	cluster:1689	28	-	chr1	44106546	44118808	ENSMUSG00000026047	Kdelc1	-	8
chr1	44114512	44114514	cluster:1690	11	-	chr1	44106546	44118808	ENSMUSG00000026047	Kdelc1	-	2
chr1	44118345	44118354	cluster:1691	10	-	chr1	44106546	44118808	ENSMUSG00000026047	Kdelc1	-	9
chr1	44118523	44118529	cluster:1692	13	-	chr1	44106546	44118808	ENSMUSG00000026047	Kdelc1	-	6
chr1	44118615	44118619	cluster:1693	19	-	chr1	44106546	44118808	ENSMUSG00000026047	Kdelc1	-	4
chr1	44118666	44118674	cluster:1694	9	-	chr1	44106546	44118808	ENSMUSG00000026047	Kdelc1	-	8
chr1	44126330	44126336	cluster:1695	19	+	chr1	44118957	44144770	ENSMUSG00000041684	Bivm	+	6
chr1	44126586	44126589	cluster:1696	7	+	chr1	44118957	44144770	ENSMUSG00000041684	Bivm	+	3
chr1	44126710	44126724	cluster:1697	21	+	chr1	44118957	44144770	ENSMUSG00000041684	Bivm	+	14
chr1	44148006	44148012	cluster:1698	10	+	chr1	44147744	44181260	ENSMUSG00000026048	Ercc5	+	6
chr1	44148519	44148521	cluster:1699	20	+	chr1	44147744	44181260	ENSMUSG00000026048	Ercc5	+	2
chr1	44158851	44158853	cluster:1700	18	+	chr1	44147744	44181260	ENSMUSG00000026048	Ercc5	+	2
chr1	44158868	44158870	cluster:1701	18	+	chr1	44147744	44181260	ENSMUSG00000026048	Ercc5	+	2
chr1	44161814	44161820	cluster:1702	9	+	chr1	44147744	44181260	ENSMUSG00000026048	Ercc5	+	6
chr1	44166853	44166855	cluster:1704	14	+	chr1	44147744	44181260	ENSMUSG00000026048	Ercc5	+	2
chr1	44167074	44167077	cluster:1705	9	+	chr1	44147744	44181260	ENSMUSG00000026048	Ercc5	+	3
chr1	44167239	44167245	cluster:1706	11	+	chr1	44147744	44181260	ENSMUSG00000026048	Ercc5	+	6
chr1	44167330	44167338	cluster:1707	26	+	chr1	44147744	44181260	ENSMUSG00000026048	Ercc5	+	8
chr1	44167636	44167638	cluster:1708	13	+	chr1	44147744	44181260	ENSMUSG00000026048	Ercc5	+	2
chr1	44167823	44167830	cluster:1710	18	+	chr1	44147744	44181260	ENSMUSG00000026048	Ercc5	+	7
chr1	44167980	44167989	cluster:1711	19	+	chr1	44147744	44181260	ENSMUSG00000026048	Ercc5	+	9
chr1	44173340	44173347	cluster:1712	20	+	chr1	44147744	44181260	ENSMUSG00000026048	Ercc5	+	7
chr1	44173496	44173510	cluster:1713	20	+	chr1	44147744	44181260	ENSMUSG00000026048	Ercc5	+	14
chr1	44173522	44173525	cluster:1714	18	+	chr1	44147744	44181260	ENSMUSG00000026048	Ercc5	+	3
chr1	44174277	44174289	cluster:1715	25	+	chr1	44147744	44181260	ENSMUSG00000026048	Ercc5	+	12
chr1	44174304	44174317	cluster:1716	26	+	chr1	44147744	44181260	ENSMUSG00000026048	Ercc5	+	13
chr1	44174344	44174363	cluster:1717	24	+	chr1	44147744	44181260	ENSMUSG00000026048	Ercc5	+	19
chr1	44179151	44179154	cluster:1718	9	+	chr1	44147744	44181260	ENSMUSG00000026048	Ercc5	+	3
chr1	44181103	44181107	cluster:1720	23	+	chr1	44147744	44181260	ENSMUSG00000026048	Ercc5	+	4
chr1	45384455	45384460	cluster:1721	109	-	chr1	45374321	45503282	ENSMUSG00000026042	Col5a2	-	5
chr1	45799116	45799118	cluster:1722	9	+	chr1	45795166	45823619	ENSMUSG00000025995	Wdr75	+	2
chr1	45813074	45813083	cluster:1724	7	+	chr1	45795166	45823619	ENSMUSG00000025995	Wdr75	+	9
chr1	45813272	45813275	cluster:1725	13	+	chr1	45795166	45823619	ENSMUSG00000025995	Wdr75	+	3
chr1	45816610	45816613	cluster:1726	8	+	chr1	45795166	45823619	ENSMUSG00000025995	Wdr75	+	3
chr1	45817327	45817330	cluster:1727	7	+	chr1	45795166	45823619	ENSMUSG00000025995	Wdr75	+	3
chr1	45817348	45817351	cluster:1728	17	+	chr1	45795166	45823619	ENSMUSG00000025995	Wdr75	+	3
chr1	45819634	45819638	cluster:1729	15	+	chr1	45795166	45823619	ENSMUSG00000025995	Wdr75	+	4
chr1	45823373	45823376	cluster:1730	14	+	chr1	45795166	45823619	ENSMUSG00000025995	Wdr75	+	3
chr1	46810027	46810029	cluster:1733	6	-	chr1	46807544	46892852	ENSMUSG00000025986	Slc39a10	-	2
chr1	46819338	46819344	cluster:1734	13	-	chr1	46807544	46892852	ENSMUSG00000025986	Slc39a10	-	6
chr1	46824732	46824741	cluster:1735	11	-	chr1	46807544	46892852	ENSMUSG00000025986	Slc39a10	-	9
chr1	46832605	46832611	cluster:1736	25	-	chr1	46807544	46892852	ENSMUSG00000025986	Slc39a10	-	6
chr1	46832622	46832631	cluster:1737	31	-	chr1	46807544	46892852	ENSMUSG00000025986	Slc39a10	-	9
chr1	46832691	46832696	cluster:1738	7	-	chr1	46807544	46892852	ENSMUSG00000025986	Slc39a10	-	5
chr1	46834834	46834836	cluster:1739	15	-	chr1	46807544	46892852	ENSMUSG00000025986	Slc39a10	-	2
chr1	46835389	46835404	cluster:1740	13	-	chr1	46807544	46892852	ENSMUSG00000025986	Slc39a10	-	15
chr1	46835589	46835596	cluster:1741	14	-	chr1	46807544	46892852	ENSMUSG00000025986	Slc39a10	-	7
chr1	46835764	46835774	cluster:1742	16	-	chr1	46807544	46892852	ENSMUSG00000025986	Slc39a10	-	10
chr1	46835803	46835806	cluster:1743	9	-	chr1	46807544	46892852	ENSMUSG00000025986	Slc39a10	-	3
chr1	46835903	46835906	cluster:1744	11	-	chr1	46807544	46892852	ENSMUSG00000025986	Slc39a10	-	3
chr1	46835983	46835993	cluster:1746	34	-	chr1	46807544	46892852	ENSMUSG00000025986	Slc39a10	-	10
chr1	46836070	46836090	cluster:1747	28	-	chr1	46807544	46892852	ENSMUSG00000025986	Slc39a10	-	20
chr1	46836145	46836147	cluster:1748	12	-	chr1	46807544	46892852	ENSMUSG00000025986	Slc39a10	-	2
chr1	51471127	51471133	cluster:1753	22	-	chr1	51465862	51478425	ENSMUSG00000026107	Nabp1	-	6
chr1	51474570	51474574	cluster:1754	10	-	chr1	51465862	51478425	ENSMUSG00000026107	Nabp1	-	4
chr1	51477485	51477494	cluster:1755	12	-	chr1	51465862	51478425	ENSMUSG00000026107	Nabp1	-	9
chr1	51477630	51477632	cluster:1756	9	-	chr1	51465862	51478425	ENSMUSG00000026107	Nabp1	-	2
chr1	51478086	51478089	cluster:1757	7	-	chr1	51465862	51478425	ENSMUSG00000026107	Nabp1	-	3
chr1	51478132	51478143	cluster:1758	11	-	chr1	51465862	51478425	ENSMUSG00000026107	Nabp1	-	11
chr1	51773308	51773317	cluster:1762	26	-	chr1	51749765	51916071	ENSMUSG00000018417	Myo1b	-	9
chr1	51776655	51776657	cluster:1763	8	-	chr1	51749765	51916071	ENSMUSG00000018417	Myo1b	-	2
chr1	51784509	51784511	cluster:1764	7	-	chr1	51749765	51916071	ENSMUSG00000018417	Myo1b	-	2
chr1	51793650	51793654	cluster:1765	12	-	chr1	51749765	51916071	ENSMUSG00000018417	Myo1b	-	4
chr1	51863377	51863380	cluster:1766	13	-	chr1	51749765	51916071	ENSMUSG00000018417	Myo1b	-	3
chr1	52185408	52185411	cluster:1768	13	-	chr1	52163448	52233232	ENSMUSG00000026103	Gls	-	3
chr1	52185489	52185494	cluster:1769	13	-	chr1	52163448	52233232	ENSMUSG00000026103	Gls	-	5
chr1	52186043	52186047	cluster:1770	10	-	chr1	52163448	52233232	ENSMUSG00000026103	Gls	-	4
chr1	52186679	52186691	cluster:1771	26	-	chr1	52163448	52233232	ENSMUSG00000026103	Gls	-	12
chr1	52186726	52186740	cluster:1772	17	-	chr1	52163448	52233232	ENSMUSG00000026103	Gls	-	14
chr1	52187053	52187056	cluster:1773	12	-	chr1	52163448	52233232	ENSMUSG00000026103	Gls	-	3
chr1	52187124	52187126	cluster:1774	21	-	chr1	52163448	52233232	ENSMUSG00000026103	Gls	-	2
chr1	52187272	52187278	cluster:1775	8	-	chr1	52163448	52233232	ENSMUSG00000026103	Gls	-	6
chr1	52187526	52187531	cluster:1776	12	-	chr1	52163448	52233232	ENSMUSG00000026103	Gls	-	5
chr1	52187572	52187581	cluster:1777	16	-	chr1	52163448	52233232	ENSMUSG00000026103	Gls	-	9
chr1	52187602	52187611	cluster:1778	22	-	chr1	52163448	52233232	ENSMUSG00000026103	Gls	-	9
chr1	52188408	52188420	cluster:1779	15	-	chr1	52163448	52233232	ENSMUSG00000026103	Gls	-	12
chr1	52188595	52188600	cluster:1780	6	-	chr1	52163448	52233232	ENSMUSG00000026103	Gls	-	5
chr1	52188723	52188728	cluster:1781	15	-	chr1	52163448	52233232	ENSMUSG00000026103	Gls	-	5
chr1	52189431	52189434	cluster:1782	11	-	chr1	52163448	52233232	ENSMUSG00000026103	Gls	-	3
chr1	52189506	52189524	cluster:1783	20	-	chr1	52163448	52233232	ENSMUSG00000026103	Gls	-	18
chr1	52191113	52191123	cluster:1784	18	-	chr1	52163448	52233232	ENSMUSG00000026103	Gls	-	10
chr1	52196798	52196808	cluster:1785	20	-	chr1	52163448	52233232	ENSMUSG00000026103	Gls	-	10
chr1	52196825	52196828	cluster:1786	16	-	chr1	52163448	52233232	ENSMUSG00000026103	Gls	-	3
chr1	52199752	52199764	cluster:1787	11	-	chr1	52163448	52233232	ENSMUSG00000026103	Gls	-	12
chr1	52200065	52200084	cluster:1788	15	-	chr1	52163448	52233232	ENSMUSG00000026103	Gls	-	19
chr1	52200302	52200312	cluster:1789	13	-	chr1	52163448	52233232	ENSMUSG00000026103	Gls	-	10
chr1	52200352	52200355	cluster:1790	20	-	chr1	52163448	52233232	ENSMUSG00000026103	Gls	-	3
chr1	52200564	52200566	cluster:1791	19	-	chr1	52163448	52233232	ENSMUSG00000026103	Gls	-	2
chr1	52200594	52200596	cluster:1792	15	-	chr1	52163448	52233232	ENSMUSG00000026103	Gls	-	2
chr1	52200713	52200717	cluster:1793	22	-	chr1	52163448	52233232	ENSMUSG00000026103	Gls	-	4
chr1	52201086	52201090	cluster:1794	15	-	chr1	52163448	52233232	ENSMUSG00000026103	Gls	-	4
chr1	52201143	52201148	cluster:1795	31	-	chr1	52163448	52233232	ENSMUSG00000026103	Gls	-	5
chr1	52201226	52201234	cluster:1796	19	-	chr1	52163448	52233232	ENSMUSG00000026103	Gls	-	8
chr1	52201250	52201255	cluster:1797	19	-	chr1	52163448	52233232	ENSMUSG00000026103	Gls	-	5
chr1	52201428	52201432	cluster:1798	20	-	chr1	52163448	52233232	ENSMUSG00000026103	Gls	-	4
chr1	52201914	52201935	cluster:1799	30	-	chr1	52163448	52233232	ENSMUSG00000026103	Gls	-	21
chr1	52202398	52202401	cluster:1800	14	-	chr1	52163448	52233232	ENSMUSG00000026103	Gls	-	3
chr1	52202560	52202563	cluster:1801	12	-	chr1	52163448	52233232	ENSMUSG00000026103	Gls	-	3
chr1	52202863	52202874	cluster:1802	26	-	chr1	52163448	52233232	ENSMUSG00000026103	Gls	-	11
chr1	52203336	52203347	cluster:1803	16	-	chr1	52163448	52233232	ENSMUSG00000026103	Gls	-	11
chr1	52203880	52203886	cluster:1804	15	-	chr1	52163448	52233232	ENSMUSG00000026103	Gls	-	6
chr1	52203897	52203899	cluster:1805	11	-	chr1	52163448	52233232	ENSMUSG00000026103	Gls	-	2
chr1	52203921	52203923	cluster:1806	9	-	chr1	52163448	52233232	ENSMUSG00000026103	Gls	-	2
chr1	52203990	52204005	cluster:1807	24	-	chr1	52163448	52233232	ENSMUSG00000026103	Gls	-	15
chr1	52204197	52204203	cluster:1808	15	-	chr1	52163448	52233232	ENSMUSG00000026103	Gls	-	6
chr1	52204350	52204352	cluster:1809	15	-	chr1	52163448	52233232	ENSMUSG00000026103	Gls	-	2
chr1	52204370	52204372	cluster:1810	17	-	chr1	52163448	52233232	ENSMUSG00000026103	Gls	-	2
chr1	52204640	52204651	cluster:1811	7	-	chr1	52163448	52233232	ENSMUSG00000026103	Gls	-	11
chr1	52204675	52204684	cluster:1812	7	-	chr1	52163448	52233232	ENSMUSG00000026103	Gls	-	9
chr1	52204819	52204822	cluster:1813	11	-	chr1	52163448	52233232	ENSMUSG00000026103	Gls	-	3
chr1	52205325	52205328	cluster:1814	10	-	chr1	52163448	52233232	ENSMUSG00000026103	Gls	-	3
chr1	52206138	52206145	cluster:1815	11	-	chr1	52163448	52233232	ENSMUSG00000026103	Gls	-	7
chr1	52206161	52206165	cluster:1816	12	-	chr1	52163448	52233232	ENSMUSG00000026103	Gls	-	4
chr1	52206180	52206188	cluster:1817	14	-	chr1	52163448	52233232	ENSMUSG00000026103	Gls	-	8
chr1	52206326	52206329	cluster:1818	8	-	chr1	52163448	52233232	ENSMUSG00000026103	Gls	-	3
chr1	52206562	52206585	cluster:1819	26	-	chr1	52163448	52233232	ENSMUSG00000026103	Gls	-	23
chr1	52206901	52206913	cluster:1820	25	-	chr1	52163448	52233232	ENSMUSG00000026103	Gls	-	12
chr1	52206966	52206988	cluster:1821	41	-	chr1	52163448	52233232	ENSMUSG00000026103	Gls	-	22
chr1	52207159	52207162	cluster:1822	14	-	chr1	52163448	52233232	ENSMUSG00000026103	Gls	-	3
chr1	52207264	52207266	cluster:1823	11	-	chr1	52163448	52233232	ENSMUSG00000026103	Gls	-	2
chr1	52207279	52207283	cluster:1824	11	-	chr1	52163448	52233232	ENSMUSG00000026103	Gls	-	4
chr1	52207332	52207351	cluster:1825	26	-	chr1	52163448	52233232	ENSMUSG00000026103	Gls	-	19
chr1	52212215	52212247	cluster:1826	77	-	chr1	52163448	52233232	ENSMUSG00000026103	Gls	-	32
chr1	52212264	52212272	cluster:1827	73	-	chr1	52163448	52233232	ENSMUSG00000026103	Gls	-	8
chr1	52212553	52212560	cluster:1828	12	-	chr1	52163448	52233232	ENSMUSG00000026103	Gls	-	7
chr1	52219115	52219121	cluster:1831	11	-	chr1	52163448	52233232	ENSMUSG00000026103	Gls	-	6
chr1	52219392	52219395	cluster:1832	7	-	chr1	52163448	52233232	ENSMUSG00000026103	Gls	-	3
chr1	52219531	52219550	cluster:1833	18	-	chr1	52163448	52233232	ENSMUSG00000026103	Gls	-	19
chr1	52219945	52219951	cluster:1834	20	-	chr1	52163448	52233232	ENSMUSG00000026103	Gls	-	6
chr1	52219975	52219978	cluster:1835	10	-	chr1	52163448	52233232	ENSMUSG00000026103	Gls	-	3
chr1	52222995	52222998	cluster:1837	7	-	chr1	52163448	52233232	ENSMUSG00000026103	Gls	-	3
chr1	52231092	52231098	cluster:1838	8	-	chr1	52163448	52233232	ENSMUSG00000026103	Gls	-	6
chr1	52231803	52231810	cluster:1839	8	-	chr1	52163448	52233232	ENSMUSG00000026103	Gls	-	7
chr1	52231853	52231876	cluster:1840	18	-	chr1	52163448	52233232	ENSMUSG00000026103	Gls	-	23
chr1	52231931	52231933	cluster:1841	6	-	chr1	52163448	52233232	ENSMUSG00000026103	Gls	-	2
chr1	52232097	52232100	cluster:1842	12	-	chr1	52163448	52233232	ENSMUSG00000026103	Gls	-	3
chr1	52232243	52232245	cluster:1843	8	-	chr1	52163448	52233232	ENSMUSG00000026103	Gls	-	2
chr1	52232523	52232526	cluster:1844	26	-	chr1	52163448	52233232	ENSMUSG00000026103	Gls	-	3
chr1	52232537	52232545	cluster:1845	29	-	chr1	52163448	52233232	ENSMUSG00000026103	Gls	-	8
chr1	52232624	52232645	cluster:1847	27	-	chr1	52163448	52233232	ENSMUSG00000026103	Gls	-	21
chr1	52232705	52232714	cluster:1848	11	-	chr1	52163448	52233232	ENSMUSG00000026103	Gls	-	9
chr1	52232770	52232777	cluster:1849	17	-	chr1	52163448	52233232	ENSMUSG00000026103	Gls	-	7
chr1	52232948	52232951	cluster:1850	21	-	chr1	52163448	52233232	ENSMUSG00000026103	Gls	-	3
chr1	52233011	52233023	cluster:1851	27	-	chr1	52163448	52233232	ENSMUSG00000026103	Gls	-	12
chr1	52233087	52233097	cluster:1852	48	-	chr1	52163448	52233232	ENSMUSG00000026103	Gls	-	10
chr1	52233111	52233114	cluster:1853	20	-	chr1	52163448	52233232	ENSMUSG00000026103	Gls	-	3
chr1	52233131	52233140	cluster:1854	11	-	chr1	52163448	52233232	ENSMUSG00000026103	Gls	-	9
chr1	52233189	52233191	cluster:1855	15	-	chr1	52163448	52233232	ENSMUSG00000026103	Gls	-	2
chr1	52638696	52638701	cluster:1856	12	+	chr1	52630703	52651919	ENSMUSG00000043015	Nemp2	+	5
chr1	52649807	52649810	cluster:1858	8	+	chr1	52630703	52651919	ENSMUSG00000043015	Nemp2	+	3
chr1	52860195	52860201	cluster:1859	13	+	chr1	52844929	52920986	ENSMUSG00000041426	Hibch	+	6
chr1	52913679	52913684	cluster:1860	6	+	chr1	52844929	52920986	ENSMUSG00000041426	Hibch	+	5
chr1	52922321	52922331	cluster:1861	19	-	chr1	52922324	53020179	ENSMUSG00000043629	1700019D03Rik	-	7
chr1	52924158	52924162	cluster:1862	16	-	chr1	52922324	53020179	ENSMUSG00000043629	1700019D03Rik	-	4
chr1	52925139	52925143	cluster:1863	12	-	chr1	52922324	53020179	ENSMUSG00000043629	1700019D03Rik	-	4
chr1	52925225	52925230	cluster:1864	23	-	chr1	52922324	53020179	ENSMUSG00000043629	1700019D03Rik	-	5
chr1	52925247	52925253	cluster:1865	29	-	chr1	52922324	53020179	ENSMUSG00000043629	1700019D03Rik	-	6
chr1	52925284	52925306	cluster:1866	35	-	chr1	52922324	53020179	ENSMUSG00000043629	1700019D03Rik	-	22
chr1	52925357	52925359	cluster:1867	23	-	chr1	52922324	53020179	ENSMUSG00000043629	1700019D03Rik	-	2
chr1	52925461	52925465	cluster:1870	30	-	chr1	52922324	53020179	ENSMUSG00000043629	1700019D03Rik	-	4
chr1	52925481	52925486	cluster:1871	33	-	chr1	52922324	53020179	ENSMUSG00000043629	1700019D03Rik	-	5
chr1	52925510	52925516	cluster:1872	34	-	chr1	52922324	53020179	ENSMUSG00000043629	1700019D03Rik	-	6
chr1	52925529	52925534	cluster:1873	41	-	chr1	52922324	53020179	ENSMUSG00000043629	1700019D03Rik	-	5
chr1	52925569	52925571	cluster:1874	22	-	chr1	52922324	53020179	ENSMUSG00000043629	1700019D03Rik	-	2
chr1	52925626	52925633	cluster:1875	22	-	chr1	52922324	53020179	ENSMUSG00000043629	1700019D03Rik	-	7
chr1	52925797	52925800	cluster:1876	18	-	chr1	52922324	53020179	ENSMUSG00000043629	1700019D03Rik	-	3
chr1	52925813	52925817	cluster:1877	12	-	chr1	52922324	53020179	ENSMUSG00000043629	1700019D03Rik	-	4
chr1	52926040	52926051	cluster:1878	28	-	chr1	52922324	53020179	ENSMUSG00000043629	1700019D03Rik	-	11
chr1	52926153	52926156	cluster:1879	10	-	chr1	52922324	53020179	ENSMUSG00000043629	1700019D03Rik	-	3
chr1	52927128	52927130	cluster:1880	14	-	chr1	52922324	53020179	ENSMUSG00000043629	1700019D03Rik	-	2
chr1	52952114	52952120	cluster:1881	16	-	chr1	52922324	53020179	ENSMUSG00000043629	1700019D03Rik	-	6
chr1	52952133	52952135	cluster:1882	16	-	chr1	52922324	53020179	ENSMUSG00000043629	1700019D03Rik	-	2
chr1	52952510	52952519	cluster:1883	27	-	chr1	52922324	53020179	ENSMUSG00000043629	1700019D03Rik	-	9
chr1	52952777	52952780	cluster:1884	22	-	chr1	52922324	53020179	ENSMUSG00000043629	1700019D03Rik	-	3
chr1	52953115	52953120	cluster:1885	20	-	chr1	52922324	53020179	ENSMUSG00000043629	1700019D03Rik	-	5
chr1	53189367	53189374	cluster:1887	12	-	chr1	53189187	53297018	ENSMUSG00000026098	Pms1	-	7
chr1	53196990	53196995	cluster:1888	11	-	chr1	53189187	53297018	ENSMUSG00000026098	Pms1	-	5
chr1	53197055	53197065	cluster:1889	28	-	chr1	53189187	53297018	ENSMUSG00000026098	Pms1	-	10
chr1	53206862	53206864	cluster:1891	15	-	chr1	53189187	53297018	ENSMUSG00000026098	Pms1	-	2
chr1	53207395	53207402	cluster:1892	10	-	chr1	53189187	53297018	ENSMUSG00000026098	Pms1	-	7
chr1	53313785	53313795	cluster:1894	6	+	chr1	53313624	53326343	ENSMUSG00000026096	Osgepl1	+	10
chr1	53313785	53313795	cluster:1894	6	+	chr1	53297111	53318035	ENSMUSG00000100679	Gm28778	+	10
chr1	53313835	53313843	cluster:1895	13	+	chr1	53313624	53326343	ENSMUSG00000026096	Osgepl1	+	8
chr1	53313835	53313843	cluster:1895	13	+	chr1	53297111	53318035	ENSMUSG00000100679	Gm28778	+	8
chr1	53316968	53316971	cluster:1896	6	+	chr1	53313624	53326343	ENSMUSG00000026096	Osgepl1	+	3
chr1	53316968	53316971	cluster:1896	6	+	chr1	53297111	53318035	ENSMUSG00000100679	Gm28778	+	3
chr1	53318185	53318189	cluster:1897	11	+	chr1	53313624	53326343	ENSMUSG00000026096	Osgepl1	+	4
chr1	53320040	53320044	cluster:1898	12	+	chr1	53313624	53326343	ENSMUSG00000026096	Osgepl1	+	4
chr1	53320084	53320090	cluster:1899	24	+	chr1	53313624	53326343	ENSMUSG00000026096	Osgepl1	+	6
chr1	53347184	53347202	cluster:1900	27	-	chr1	53325507	53352667	ENSMUSG00000099913	Gm28551	-	18
chr1	53347184	53347202	cluster:1900	27	-	chr1	53344617	53352752	ENSMUSG00000026095	Asnsd1	-	18
chr1	53347229	53347233	cluster:1901	29	-	chr1	53325507	53352667	ENSMUSG00000099913	Gm28551	-	4
chr1	53347229	53347233	cluster:1901	29	-	chr1	53344617	53352752	ENSMUSG00000026095	Asnsd1	-	4
chr1	53347420	53347446	cluster:1902	38	-	chr1	53325507	53352667	ENSMUSG00000099913	Gm28551	-	26
chr1	53347420	53347446	cluster:1902	38	-	chr1	53344617	53352752	ENSMUSG00000026095	Asnsd1	-	26
chr1	53347563	53347567	cluster:1903	14	-	chr1	53325507	53352667	ENSMUSG00000099913	Gm28551	-	4
chr1	53347563	53347567	cluster:1903	14	-	chr1	53344617	53352752	ENSMUSG00000026095	Asnsd1	-	4
chr1	53347671	53347684	cluster:1904	12	-	chr1	53325507	53352667	ENSMUSG00000099913	Gm28551	-	13
chr1	53347671	53347684	cluster:1904	12	-	chr1	53344617	53352752	ENSMUSG00000026095	Asnsd1	-	13
chr1	53348070	53348097	cluster:1905	18	-	chr1	53325507	53352667	ENSMUSG00000099913	Gm28551	-	27
chr1	53348070	53348097	cluster:1905	18	-	chr1	53344617	53352752	ENSMUSG00000026095	Asnsd1	-	27
chr1	53348228	53348230	cluster:1906	14	-	chr1	53325507	53352667	ENSMUSG00000099913	Gm28551	-	2
chr1	53348228	53348230	cluster:1906	14	-	chr1	53344617	53352752	ENSMUSG00000026095	Asnsd1	-	2
chr1	53348300	53348302	cluster:1907	30	-	chr1	53325507	53352667	ENSMUSG00000099913	Gm28551	-	2
chr1	53348300	53348302	cluster:1907	30	-	chr1	53344617	53352752	ENSMUSG00000026095	Asnsd1	-	2
chr1	53348323	53348325	cluster:1908	30	-	chr1	53325507	53352667	ENSMUSG00000099913	Gm28551	-	2
chr1	53348323	53348325	cluster:1908	30	-	chr1	53344617	53352752	ENSMUSG00000026095	Asnsd1	-	2
chr1	53348429	53348434	cluster:1909	7	-	chr1	53325507	53352667	ENSMUSG00000099913	Gm28551	-	5
chr1	53348429	53348434	cluster:1909	7	-	chr1	53344617	53352752	ENSMUSG00000026095	Asnsd1	-	5
chr1	53348499	53348501	cluster:1910	6	-	chr1	53325507	53352667	ENSMUSG00000099913	Gm28551	-	2
chr1	53348499	53348501	cluster:1910	6	-	chr1	53344617	53352752	ENSMUSG00000026095	Asnsd1	-	2
chr1	53350029	53350035	cluster:1911	18	-	chr1	53325507	53352667	ENSMUSG00000099913	Gm28551	-	6
chr1	53350029	53350035	cluster:1911	18	-	chr1	53344617	53352752	ENSMUSG00000026095	Asnsd1	-	6
chr1	53352643	53352648	cluster:1912	23	-	chr1	53325507	53352667	ENSMUSG00000099913	Gm28551	-	5
chr1	53352643	53352648	cluster:1912	23	-	chr1	53344617	53352752	ENSMUSG00000026095	Asnsd1	-	5
chr1	53757389	53757397	cluster:1913	11	-	chr1	53755506	53785224	ENSMUSG00000026094	Stk17b	-	8
chr1	54404988	54404996	cluster:1914	9	-	chr1	54396004	54438971	ENSMUSG00000041303	Gtf3c3	-	8
chr1	54437938	54437940	cluster:1915	14	-	chr1	54396004	54438971	ENSMUSG00000041303	Gtf3c3	-	2
chr1	54438820	54438823	cluster:1916	15	-	chr1	54396004	54438971	ENSMUSG00000041303	Gtf3c3	-	3
chr1	54438912	54438915	cluster:1918	13	-	chr1	54396004	54438971	ENSMUSG00000041303	Gtf3c3	-	3
chr1	54478351	54478357	cluster:1919	9	-	chr1	54472994	54557684	ENSMUSG00000073678	Pgap1	-	6
chr1	54478859	54478864	cluster:1920	9	-	chr1	54472994	54557684	ENSMUSG00000073678	Pgap1	-	5
chr1	54479646	54479651	cluster:1921	12	-	chr1	54472994	54557684	ENSMUSG00000073678	Pgap1	-	5
chr1	54480811	54480813	cluster:1923	12	-	chr1	54472994	54557684	ENSMUSG00000073678	Pgap1	-	2
chr1	54987044	54987047	cluster:1927	9	-	chr1	54985169	55027481	ENSMUSG00000025982	Sf3b1	-	3
chr1	54987070	54987072	cluster:1928	7	-	chr1	54985169	55027481	ENSMUSG00000025982	Sf3b1	-	2
chr1	54987103	54987117	cluster:1929	26	-	chr1	54985169	55027481	ENSMUSG00000025982	Sf3b1	-	14
chr1	54987178	54987217	cluster:1930	67	-	chr1	54985169	55027481	ENSMUSG00000025982	Sf3b1	-	39
chr1	54987233	54987241	cluster:1931	54	-	chr1	54985169	55027481	ENSMUSG00000025982	Sf3b1	-	8
chr1	54987301	54987324	cluster:1932	43	-	chr1	54985169	55027481	ENSMUSG00000025982	Sf3b1	-	23
chr1	54987382	54987387	cluster:1933	16	-	chr1	54985169	55027481	ENSMUSG00000025982	Sf3b1	-	5
chr1	54987428	54987432	cluster:1934	31	-	chr1	54985169	55027481	ENSMUSG00000025982	Sf3b1	-	4
chr1	54987969	54987980	cluster:1935	28	-	chr1	54985169	55027481	ENSMUSG00000025982	Sf3b1	-	11
chr1	54988089	54988097	cluster:1936	45	-	chr1	54985169	55027481	ENSMUSG00000025982	Sf3b1	-	8
chr1	54988140	54988147	cluster:1937	10	-	chr1	54985169	55027481	ENSMUSG00000025982	Sf3b1	-	7
chr1	54990309	54990313	cluster:1938	15	-	chr1	54985169	55027481	ENSMUSG00000025982	Sf3b1	-	4
chr1	54990370	54990373	cluster:1939	19	-	chr1	54985169	55027481	ENSMUSG00000025982	Sf3b1	-	3
chr1	54990441	54990466	cluster:1940	26	-	chr1	54985169	55027481	ENSMUSG00000025982	Sf3b1	-	25
chr1	54990478	54990486	cluster:1941	21	-	chr1	54985169	55027481	ENSMUSG00000025982	Sf3b1	-	8
chr1	54990508	54990514	cluster:1942	17	-	chr1	54985169	55027481	ENSMUSG00000025982	Sf3b1	-	6
chr1	54990531	54990549	cluster:1943	21	-	chr1	54985169	55027481	ENSMUSG00000025982	Sf3b1	-	18
chr1	54990659	54990662	cluster:1944	7	-	chr1	54985169	55027481	ENSMUSG00000025982	Sf3b1	-	3
chr1	54994399	54994410	cluster:1945	21	-	chr1	54985169	55027481	ENSMUSG00000025982	Sf3b1	-	11
chr1	54994435	54994447	cluster:1946	28	-	chr1	54985169	55027481	ENSMUSG00000025982	Sf3b1	-	12
chr1	54995453	54995463	cluster:1948	20	-	chr1	54985169	55027481	ENSMUSG00000025982	Sf3b1	-	10
chr1	54996849	54996851	cluster:1949	21	-	chr1	54985169	55027481	ENSMUSG00000025982	Sf3b1	-	2
chr1	54996864	54996868	cluster:1950	21	-	chr1	54985169	55027481	ENSMUSG00000025982	Sf3b1	-	4
chr1	54997045	54997049	cluster:1951	15	-	chr1	54985169	55027481	ENSMUSG00000025982	Sf3b1	-	4
chr1	54998057	54998079	cluster:1952	68	-	chr1	54985169	55027481	ENSMUSG00000025982	Sf3b1	-	22
chr1	54998094	54998109	cluster:1953	66	-	chr1	54985169	55027481	ENSMUSG00000025982	Sf3b1	-	15
chr1	54998120	54998133	cluster:1954	71	-	chr1	54985169	55027481	ENSMUSG00000025982	Sf3b1	-	13
chr1	54998157	54998167	cluster:1955	50	-	chr1	54985169	55027481	ENSMUSG00000025982	Sf3b1	-	10
chr1	54998195	54998203	cluster:1956	12	-	chr1	54985169	55027481	ENSMUSG00000025982	Sf3b1	-	8
chr1	54998250	54998256	cluster:1957	28	-	chr1	54985169	55027481	ENSMUSG00000025982	Sf3b1	-	6
chr1	54999642	54999655	cluster:1958	77	-	chr1	54985169	55027481	ENSMUSG00000025982	Sf3b1	-	13
chr1	54999666	54999708	cluster:1959	94	-	chr1	54985169	55027481	ENSMUSG00000025982	Sf3b1	-	42
chr1	55000019	55000055	cluster:1960	44	-	chr1	54985169	55027481	ENSMUSG00000025982	Sf3b1	-	36
chr1	55000092	55000094	cluster:1961	8	-	chr1	54985169	55027481	ENSMUSG00000025982	Sf3b1	-	2
chr1	55000293	55000296	cluster:1962	12	-	chr1	54985169	55027481	ENSMUSG00000025982	Sf3b1	-	3
chr1	55000308	55000311	cluster:1963	12	-	chr1	54985169	55027481	ENSMUSG00000025982	Sf3b1	-	3
chr1	55000390	55000394	cluster:1964	8	-	chr1	54985169	55027481	ENSMUSG00000025982	Sf3b1	-	4
chr1	55000685	55000687	cluster:1965	6	-	chr1	54985169	55027481	ENSMUSG00000025982	Sf3b1	-	2
chr1	55000727	55000729	cluster:1966	16	-	chr1	54985169	55027481	ENSMUSG00000025982	Sf3b1	-	2
chr1	55000745	55000751	cluster:1967	12	-	chr1	54985169	55027481	ENSMUSG00000025982	Sf3b1	-	6
chr1	55000781	55000795	cluster:1968	27	-	chr1	54985169	55027481	ENSMUSG00000025982	Sf3b1	-	14
chr1	55001021	55001029	cluster:1970	32	-	chr1	54985169	55027481	ENSMUSG00000025982	Sf3b1	-	8
chr1	55001046	55001059	cluster:1971	53	-	chr1	54985169	55027481	ENSMUSG00000025982	Sf3b1	-	13
chr1	55001097	55001106	cluster:1972	56	-	chr1	54985169	55027481	ENSMUSG00000025982	Sf3b1	-	9
chr1	55001419	55001425	cluster:1973	62	-	chr1	54985169	55027481	ENSMUSG00000025982	Sf3b1	-	6
chr1	55001438	55001454	cluster:1974	64	-	chr1	54985169	55027481	ENSMUSG00000025982	Sf3b1	-	16
chr1	55001465	55001509	cluster:1975	92	-	chr1	54985169	55027481	ENSMUSG00000025982	Sf3b1	-	44
chr1	55001544	55001556	cluster:1976	26	-	chr1	54985169	55027481	ENSMUSG00000025982	Sf3b1	-	12
chr1	55003178	55003199	cluster:1977	57	-	chr1	54985169	55027481	ENSMUSG00000025982	Sf3b1	-	21
chr1	55003296	55003307	cluster:1978	31	-	chr1	54985169	55027481	ENSMUSG00000025982	Sf3b1	-	11
chr1	55003330	55003335	cluster:1979	42	-	chr1	54985169	55027481	ENSMUSG00000025982	Sf3b1	-	5
chr1	55003399	55003411	cluster:1980	26	-	chr1	54985169	55027481	ENSMUSG00000025982	Sf3b1	-	12
chr1	55003468	55003495	cluster:1982	59	-	chr1	54985169	55027481	ENSMUSG00000025982	Sf3b1	-	27
chr1	55005811	55005815	cluster:1983	25	-	chr1	54985169	55027481	ENSMUSG00000025982	Sf3b1	-	4
chr1	55005830	55005832	cluster:1984	24	-	chr1	54985169	55027481	ENSMUSG00000025982	Sf3b1	-	2
chr1	55007685	55007687	cluster:1986	6	-	chr1	54985169	55027481	ENSMUSG00000025982	Sf3b1	-	2
chr1	55012160	55012166	cluster:1987	11	-	chr1	54985169	55027481	ENSMUSG00000025982	Sf3b1	-	6
chr1	55012265	55012267	cluster:1988	19	-	chr1	54985169	55027481	ENSMUSG00000025982	Sf3b1	-	2
chr1	55014492	55014499	cluster:1989	56	-	chr1	54985169	55027481	ENSMUSG00000025982	Sf3b1	-	7
chr1	55014521	55014529	cluster:1990	59	-	chr1	54985169	55027481	ENSMUSG00000025982	Sf3b1	-	8
chr1	55014543	55014547	cluster:1991	54	-	chr1	54985169	55027481	ENSMUSG00000025982	Sf3b1	-	4
chr1	55014569	55014572	cluster:1992	21	-	chr1	54985169	55027481	ENSMUSG00000025982	Sf3b1	-	3
chr1	55014592	55014594	cluster:1993	18	-	chr1	54985169	55027481	ENSMUSG00000025982	Sf3b1	-	2
chr1	55015005	55015025	cluster:1994	22	-	chr1	54985169	55027481	ENSMUSG00000025982	Sf3b1	-	20
chr1	55015070	55015072	cluster:1995	18	-	chr1	54985169	55027481	ENSMUSG00000025982	Sf3b1	-	2
chr1	55015085	55015093	cluster:1996	20	-	chr1	54985169	55027481	ENSMUSG00000025982	Sf3b1	-	8
chr1	55015183	55015192	cluster:1997	12	-	chr1	54985169	55027481	ENSMUSG00000025982	Sf3b1	-	9
chr1	55015435	55015447	cluster:1998	17	-	chr1	54985169	55027481	ENSMUSG00000025982	Sf3b1	-	12
chr1	55015489	55015492	cluster:1999	6	-	chr1	54985169	55027481	ENSMUSG00000025982	Sf3b1	-	3
chr1	55015620	55015628	cluster:2001	8	-	chr1	54985169	55027481	ENSMUSG00000025982	Sf3b1	-	8
chr1	55015994	55016003	cluster:2002	10	-	chr1	54985169	55027481	ENSMUSG00000025982	Sf3b1	-	9
chr1	55016025	55016027	cluster:2003	12	-	chr1	54985169	55027481	ENSMUSG00000025982	Sf3b1	-	2
chr1	55016073	55016075	cluster:2004	9	-	chr1	54985169	55027481	ENSMUSG00000025982	Sf3b1	-	2
chr1	55016111	55016118	cluster:2005	10	-	chr1	54985169	55027481	ENSMUSG00000025982	Sf3b1	-	7
chr1	55016198	55016207	cluster:2006	8	-	chr1	54985169	55027481	ENSMUSG00000025982	Sf3b1	-	9
chr1	55016254	55016257	cluster:2007	31	-	chr1	54985169	55027481	ENSMUSG00000025982	Sf3b1	-	3
chr1	55016269	55016273	cluster:2008	27	-	chr1	54985169	55027481	ENSMUSG00000025982	Sf3b1	-	4
chr1	55016288	55016308	cluster:2009	41	-	chr1	54985169	55027481	ENSMUSG00000025982	Sf3b1	-	20
chr1	55016327	55016337	cluster:2010	23	-	chr1	54985169	55027481	ENSMUSG00000025982	Sf3b1	-	10
chr1	55016381	55016390	cluster:2011	41	-	chr1	54985169	55027481	ENSMUSG00000025982	Sf3b1	-	9
chr1	55016401	55016409	cluster:2012	45	-	chr1	54985169	55027481	ENSMUSG00000025982	Sf3b1	-	8
chr1	55016428	55016442	cluster:2013	30	-	chr1	54985169	55027481	ENSMUSG00000025982	Sf3b1	-	14
chr1	55016481	55016483	cluster:2014	24	-	chr1	54985169	55027481	ENSMUSG00000025982	Sf3b1	-	2
chr1	55016823	55016835	cluster:2015	16	-	chr1	54985169	55027481	ENSMUSG00000025982	Sf3b1	-	12
chr1	55019265	55019270	cluster:2016	24	-	chr1	54985169	55027481	ENSMUSG00000025982	Sf3b1	-	5
chr1	55019325	55019339	cluster:2017	25	-	chr1	54985169	55027481	ENSMUSG00000025982	Sf3b1	-	14
chr1	55019375	55019400	cluster:2018	36	-	chr1	54985169	55027481	ENSMUSG00000025982	Sf3b1	-	25
chr1	55027345	55027357	cluster:2019	14	-	chr1	54985169	55027481	ENSMUSG00000025982	Sf3b1	-	12
chr1	55027369	55027381	cluster:2020	24	-	chr1	54985169	55027481	ENSMUSG00000025982	Sf3b1	-	12
chr1	55065320	55065327	cluster:2021	11	+	chr1	55052770	55072702	ENSMUSG00000025981	Coq10b	+	7
chr1	55077835	55077841	cluster:2022	9	-	chr1	55077835	55088243	ENSMUSG00000025980	Hspd1	-	6
chr1	55078450	55078461	cluster:2023	13	-	chr1	55077835	55088243	ENSMUSG00000025980	Hspd1	-	11
chr1	55078502	55078506	cluster:2024	18	-	chr1	55077835	55088243	ENSMUSG00000025980	Hspd1	-	4
chr1	55078979	55078984	cluster:2025	24	-	chr1	55077835	55088243	ENSMUSG00000025980	Hspd1	-	5
chr1	55079015	55079020	cluster:2026	18	-	chr1	55077835	55088243	ENSMUSG00000025980	Hspd1	-	5
chr1	55079204	55079214	cluster:2027	29	-	chr1	55077835	55088243	ENSMUSG00000025980	Hspd1	-	10
chr1	55079239	55079242	cluster:2028	7	-	chr1	55077835	55088243	ENSMUSG00000025980	Hspd1	-	3
chr1	55079981	55080016	cluster:2030	30	-	chr1	55077835	55088243	ENSMUSG00000025980	Hspd1	-	35
chr1	55080066	55080075	cluster:2031	12	-	chr1	55077835	55088243	ENSMUSG00000025980	Hspd1	-	9
chr1	55080156	55080171	cluster:2032	32	-	chr1	55077835	55088243	ENSMUSG00000025980	Hspd1	-	15
chr1	55080698	55080707	cluster:2033	10	-	chr1	55077835	55088243	ENSMUSG00000025980	Hspd1	-	9
chr1	55080767	55080775	cluster:2034	13	-	chr1	55077835	55088243	ENSMUSG00000025980	Hspd1	-	8
chr1	55080797	55080800	cluster:2035	10	-	chr1	55077835	55088243	ENSMUSG00000025980	Hspd1	-	3
chr1	55081051	55081068	cluster:2036	13	-	chr1	55077835	55088243	ENSMUSG00000025980	Hspd1	-	17
chr1	55081080	55081104	cluster:2037	29	-	chr1	55077835	55088243	ENSMUSG00000025980	Hspd1	-	24
chr1	55081391	55081394	cluster:2038	22	-	chr1	55077835	55088243	ENSMUSG00000025980	Hspd1	-	3
chr1	55082072	55082076	cluster:2039	27	-	chr1	55077835	55088243	ENSMUSG00000025980	Hspd1	-	4
chr1	55082581	55082584	cluster:2040	7	-	chr1	55077835	55088243	ENSMUSG00000025980	Hspd1	-	3
chr1	55082929	55082938	cluster:2041	10	-	chr1	55077835	55088243	ENSMUSG00000025980	Hspd1	-	9
chr1	55084436	55084441	cluster:2042	10	-	chr1	55077835	55088243	ENSMUSG00000025980	Hspd1	-	5
chr1	55084685	55084694	cluster:2043	20	-	chr1	55077835	55088243	ENSMUSG00000025980	Hspd1	-	9
chr1	55084825	55084827	cluster:2044	9	-	chr1	55077835	55088243	ENSMUSG00000025980	Hspd1	-	2
chr1	55084863	55084873	cluster:2045	40	-	chr1	55077835	55088243	ENSMUSG00000025980	Hspd1	-	10
chr1	55084898	55084905	cluster:2046	32	-	chr1	55077835	55088243	ENSMUSG00000025980	Hspd1	-	7
chr1	55084940	55084942	cluster:2047	17	-	chr1	55077835	55088243	ENSMUSG00000025980	Hspd1	-	2
chr1	55084967	55084973	cluster:2048	17	-	chr1	55077835	55088243	ENSMUSG00000025980	Hspd1	-	6
chr1	55085773	55085777	cluster:2049	10	-	chr1	55077835	55088243	ENSMUSG00000025980	Hspd1	-	4
chr1	55085926	55085932	cluster:2050	13	-	chr1	55077835	55088243	ENSMUSG00000025980	Hspd1	-	6
chr1	55085979	55085982	cluster:2051	10	-	chr1	55077835	55088243	ENSMUSG00000025980	Hspd1	-	3
chr1	55086309	55086316	cluster:2052	17	-	chr1	55077835	55088243	ENSMUSG00000025980	Hspd1	-	7
chr1	55086569	55086571	cluster:2053	18	-	chr1	55077835	55088243	ENSMUSG00000025980	Hspd1	-	2
chr1	55086591	55086603	cluster:2054	20	-	chr1	55077835	55088243	ENSMUSG00000025980	Hspd1	-	12
chr1	55086660	55086671	cluster:2055	10	-	chr1	55077835	55088243	ENSMUSG00000025980	Hspd1	-	11
chr1	55086707	55086713	cluster:2056	14	-	chr1	55077835	55088243	ENSMUSG00000025980	Hspd1	-	6
chr1	55086952	55086954	cluster:2057	12	-	chr1	55077835	55088243	ENSMUSG00000025980	Hspd1	-	2
chr1	55087212	55087234	cluster:2058	43	-	chr1	55077835	55088243	ENSMUSG00000025980	Hspd1	-	22
chr1	55087272	55087274	cluster:2059	10	-	chr1	55077835	55088243	ENSMUSG00000025980	Hspd1	-	2
chr1	55087359	55087370	cluster:2060	20	-	chr1	55077835	55088243	ENSMUSG00000025980	Hspd1	-	11
chr1	55087453	55087462	cluster:2061	17	-	chr1	55077835	55088243	ENSMUSG00000025980	Hspd1	-	9
chr1	55087493	55087503	cluster:2062	15	-	chr1	55077835	55088243	ENSMUSG00000025980	Hspd1	-	10
chr1	55087549	55087566	cluster:2063	22	-	chr1	55077835	55088243	ENSMUSG00000025980	Hspd1	-	17
chr1	55087626	55087632	cluster:2064	8	-	chr1	55077835	55088243	ENSMUSG00000025980	Hspd1	-	6
chr1	55087818	55087849	cluster:2065	67	-	chr1	55077835	55088243	ENSMUSG00000025980	Hspd1	-	31
chr1	55088311	55088321	cluster:2066	41	+	chr1	55088132	55091307	ENSMUSG00000073676	Hspe1	+	10
chr1	55088344	55088367	cluster:2067	36	+	chr1	55088132	55091307	ENSMUSG00000073676	Hspe1	+	23
chr1	55089321	55089325	cluster:2068	13	+	chr1	55088132	55091307	ENSMUSG00000073676	Hspe1	+	4
chr1	55089336	55089342	cluster:2069	11	+	chr1	55088132	55091307	ENSMUSG00000073676	Hspe1	+	6
chr1	55089379	55089382	cluster:2070	7	+	chr1	55088132	55091307	ENSMUSG00000073676	Hspe1	+	3
chr1	55090205	55090213	cluster:2071	17	+	chr1	55088132	55091307	ENSMUSG00000073676	Hspe1	+	8
chr1	55090453	55090458	cluster:2072	6	+	chr1	55088132	55091307	ENSMUSG00000073676	Hspe1	+	5
chr1	55090624	55090633	cluster:2073	8	+	chr1	55088132	55091307	ENSMUSG00000073676	Hspe1	+	9
chr1	55148564	55148571	cluster:2074	8	+	chr1	55131231	55154899	ENSMUSG00000025979	Mob4	+	7
chr1	55151048	55151056	cluster:2075	7	+	chr1	55131231	55154899	ENSMUSG00000025979	Mob4	+	8
chr1	55237370	55237379	cluster:2076	14	+	chr1	55237177	55248470	ENSMUSG00000046994	Mars2	+	9
chr1	55237480	55237482	cluster:2077	11	+	chr1	55237177	55248470	ENSMUSG00000046994	Mars2	+	2
chr1	55237581	55237591	cluster:2078	49	+	chr1	55237177	55248470	ENSMUSG00000046994	Mars2	+	10
chr1	55237611	55237621	cluster:2079	23	+	chr1	55237177	55248470	ENSMUSG00000046994	Mars2	+	10
chr1	55237663	55237667	cluster:2080	16	+	chr1	55237177	55248470	ENSMUSG00000046994	Mars2	+	4
chr1	55237699	55237711	cluster:2081	16	+	chr1	55237177	55248470	ENSMUSG00000046994	Mars2	+	12
chr1	55237848	55237856	cluster:2082	45	+	chr1	55237177	55248470	ENSMUSG00000046994	Mars2	+	8
chr1	55237869	55237871	cluster:2083	56	+	chr1	55237177	55248470	ENSMUSG00000046994	Mars2	+	2
chr1	55238106	55238108	cluster:2084	21	+	chr1	55237177	55248470	ENSMUSG00000046994	Mars2	+	2
chr1	55238132	55238142	cluster:2085	13	+	chr1	55237177	55248470	ENSMUSG00000046994	Mars2	+	10
chr1	55238305	55238314	cluster:2086	14	+	chr1	55237177	55248470	ENSMUSG00000046994	Mars2	+	9
chr1	55238435	55238438	cluster:2087	19	+	chr1	55237177	55248470	ENSMUSG00000046994	Mars2	+	3
chr1	55238519	55238522	cluster:2088	8	+	chr1	55237177	55248470	ENSMUSG00000046994	Mars2	+	3
chr1	55238788	55238796	cluster:2089	21	+	chr1	55237177	55248470	ENSMUSG00000046994	Mars2	+	8
chr1	55238938	55238946	cluster:2090	15	+	chr1	55237177	55248470	ENSMUSG00000046994	Mars2	+	8
chr1	55239390	55239401	cluster:2091	15	+	chr1	55237177	55248470	ENSMUSG00000046994	Mars2	+	11
chr1	55239425	55239427	cluster:2092	8	+	chr1	55237177	55248470	ENSMUSG00000046994	Mars2	+	2
chr1	57396783	57396791	cluster:2098	15	-	chr1	57388237	57407101	ENSMUSG00000048495	Tyw5	-	8
chr1	57407155	57407164	cluster:2099	23	+	chr1	57406328	57417953	ENSMUSG00000025971	Maip1	+	9
chr1	57407411	57407417	cluster:2100	20	+	chr1	57406328	57417953	ENSMUSG00000025971	Maip1	+	6
chr1	57407994	57407998	cluster:2101	9	+	chr1	57406328	57417953	ENSMUSG00000025971	Maip1	+	4
chr1	57996258	57996270	cluster:2102	18	+	chr1	57995971	58025899	ENSMUSG00000026039	Sgol2a	+	12
chr1	57998127	57998129	cluster:2103	9	+	chr1	57995971	58025899	ENSMUSG00000026039	Sgol2a	+	2
chr1	57999967	57999975	cluster:2105	8	+	chr1	57995971	58025899	ENSMUSG00000026039	Sgol2a	+	8
chr1	58002894	58002904	cluster:2106	10	+	chr1	57995971	58025899	ENSMUSG00000026039	Sgol2a	+	10
chr1	58013490	58013502	cluster:2107	19	+	chr1	57995971	58025899	ENSMUSG00000026039	Sgol2a	+	12
chr1	58013601	58013617	cluster:2108	24	+	chr1	57995971	58025899	ENSMUSG00000026039	Sgol2a	+	16
chr1	58013705	58013724	cluster:2110	19	+	chr1	57995971	58025899	ENSMUSG00000026039	Sgol2a	+	19
chr1	58015350	58015355	cluster:2111	12	+	chr1	57995971	58025899	ENSMUSG00000026039	Sgol2a	+	5
chr1	58015545	58015580	cluster:2112	18	+	chr1	57995971	58025899	ENSMUSG00000026039	Sgol2a	+	35
chr1	58015611	58015636	cluster:2113	26	+	chr1	57995971	58025899	ENSMUSG00000026039	Sgol2a	+	25
chr1	58015684	58015690	cluster:2114	12	+	chr1	57995971	58025899	ENSMUSG00000026039	Sgol2a	+	6
chr1	58015725	58015735	cluster:2115	27	+	chr1	57995971	58025899	ENSMUSG00000026039	Sgol2a	+	10
chr1	58015746	58015766	cluster:2116	26	+	chr1	57995971	58025899	ENSMUSG00000026039	Sgol2a	+	20
chr1	58015894	58015898	cluster:2117	10	+	chr1	57995971	58025899	ENSMUSG00000026039	Sgol2a	+	4
chr1	58016189	58016199	cluster:2118	38	+	chr1	57995971	58025899	ENSMUSG00000026039	Sgol2a	+	10
chr1	58016218	58016222	cluster:2119	35	+	chr1	57995971	58025899	ENSMUSG00000026039	Sgol2a	+	4
chr1	58016253	58016257	cluster:2120	41	+	chr1	57995971	58025899	ENSMUSG00000026039	Sgol2a	+	4
chr1	58016283	58016291	cluster:2121	40	+	chr1	57995971	58025899	ENSMUSG00000026039	Sgol2a	+	8
chr1	58016375	58016377	cluster:2122	17	+	chr1	57995971	58025899	ENSMUSG00000026039	Sgol2a	+	2
chr1	58016535	58016542	cluster:2123	13	+	chr1	57995971	58025899	ENSMUSG00000026039	Sgol2a	+	7
chr1	58016632	58016634	cluster:2124	9	+	chr1	57995971	58025899	ENSMUSG00000026039	Sgol2a	+	2
chr1	58016789	58016795	cluster:2126	11	+	chr1	57995971	58025899	ENSMUSG00000026039	Sgol2a	+	6
chr1	58017840	58017844	cluster:2129	13	+	chr1	57995971	58025899	ENSMUSG00000026039	Sgol2a	+	4
chr1	58017975	58017978	cluster:2130	8	+	chr1	57995971	58025899	ENSMUSG00000026039	Sgol2a	+	3
chr1	58018032	58018034	cluster:2131	11	+	chr1	57995971	58025899	ENSMUSG00000026039	Sgol2a	+	2
chr1	58024907	58024913	cluster:2132	40	+	chr1	57995971	58025899	ENSMUSG00000026039	Sgol2a	+	6
chr1	58024934	58024959	cluster:2133	42	+	chr1	57995971	58025899	ENSMUSG00000026039	Sgol2a	+	25
chr1	58024973	58024975	cluster:2134	33	+	chr1	57995971	58025899	ENSMUSG00000026039	Sgol2a	+	2
chr1	58025355	58025358	cluster:2135	13	+	chr1	57995971	58025899	ENSMUSG00000026039	Sgol2a	+	3
chr1	58394256	58394258	cluster:2139	30	+	chr1	58392898	58407353	ENSMUSG00000051223	Bzw1	+	2
chr1	58396885	58396890	cluster:2140	9	+	chr1	58392898	58407353	ENSMUSG00000051223	Bzw1	+	5
chr1	58400081	58400084	cluster:2141	18	+	chr1	58392898	58407353	ENSMUSG00000051223	Bzw1	+	3
chr1	58403693	58403699	cluster:2143	12	+	chr1	58392898	58407353	ENSMUSG00000051223	Bzw1	+	6
chr1	58405612	58405620	cluster:2144	12	+	chr1	58392898	58407353	ENSMUSG00000051223	Bzw1	+	8
chr1	58405884	58405893	cluster:2145	26	+	chr1	58392898	58407353	ENSMUSG00000051223	Bzw1	+	9
chr1	58406237	58406239	cluster:2146	11	+	chr1	58392898	58407353	ENSMUSG00000051223	Bzw1	+	2
chr1	58406569	58406577	cluster:2147	25	+	chr1	58392898	58407353	ENSMUSG00000051223	Bzw1	+	8
chr1	58412221	58412224	cluster:2148	14	-	chr1	58410189	58424066	ENSMUSG00000026034	Clk1	-	3
chr1	58412250	58412252	cluster:2149	10	-	chr1	58410189	58424066	ENSMUSG00000026034	Clk1	-	2
chr1	58412279	58412281	cluster:2150	13	-	chr1	58410189	58424066	ENSMUSG00000026034	Clk1	-	2
chr1	58412333	58412337	cluster:2151	19	-	chr1	58410189	58424066	ENSMUSG00000026034	Clk1	-	4
chr1	58412521	58412527	cluster:2152	10	-	chr1	58410189	58424066	ENSMUSG00000026034	Clk1	-	6
chr1	58412659	58412669	cluster:2153	24	-	chr1	58410189	58424066	ENSMUSG00000026034	Clk1	-	10
chr1	58412958	58412963	cluster:2154	10	-	chr1	58410189	58424066	ENSMUSG00000026034	Clk1	-	5
chr1	58413001	58413018	cluster:2155	16	-	chr1	58410189	58424066	ENSMUSG00000026034	Clk1	-	17
chr1	58413393	58413423	cluster:2156	42	-	chr1	58410189	58424066	ENSMUSG00000026034	Clk1	-	30
chr1	58414375	58414378	cluster:2157	16	-	chr1	58410189	58424066	ENSMUSG00000026034	Clk1	-	3
chr1	58414500	58414505	cluster:2158	7	-	chr1	58410189	58424066	ENSMUSG00000026034	Clk1	-	5
chr1	58414602	58414604	cluster:2159	10	-	chr1	58410189	58424066	ENSMUSG00000026034	Clk1	-	2
chr1	58414666	58414675	cluster:2160	12	-	chr1	58410189	58424066	ENSMUSG00000026034	Clk1	-	9
chr1	58414770	58414774	cluster:2161	9	-	chr1	58410189	58424066	ENSMUSG00000026034	Clk1	-	4
chr1	58415846	58415856	cluster:2163	8	-	chr1	58410189	58424066	ENSMUSG00000026034	Clk1	-	10
chr1	58415897	58415907	cluster:2164	7	-	chr1	58410189	58424066	ENSMUSG00000026034	Clk1	-	10
chr1	58416169	58416174	cluster:2166	16	-	chr1	58410189	58424066	ENSMUSG00000026034	Clk1	-	5
chr1	58416506	58416515	cluster:2167	14	-	chr1	58410189	58424066	ENSMUSG00000026034	Clk1	-	9
chr1	58416887	58416891	cluster:2169	16	-	chr1	58410189	58424066	ENSMUSG00000026034	Clk1	-	4
chr1	58416984	58416987	cluster:2170	11	-	chr1	58410189	58424066	ENSMUSG00000026034	Clk1	-	3
chr1	58417073	58417077	cluster:2171	26	-	chr1	58410189	58424066	ENSMUSG00000026034	Clk1	-	4
chr1	58417089	58417114	cluster:2172	70	-	chr1	58410189	58424066	ENSMUSG00000026034	Clk1	-	25
chr1	58417130	58417164	cluster:2173	70	-	chr1	58410189	58424066	ENSMUSG00000026034	Clk1	-	34
chr1	58417179	58417182	cluster:2174	59	-	chr1	58410189	58424066	ENSMUSG00000026034	Clk1	-	3
chr1	58417336	58417355	cluster:2175	17	-	chr1	58410189	58424066	ENSMUSG00000026034	Clk1	-	19
chr1	58417377	58417399	cluster:2176	20	-	chr1	58410189	58424066	ENSMUSG00000026034	Clk1	-	22
chr1	58419673	58419698	cluster:2178	95	-	chr1	58410189	58424066	ENSMUSG00000026034	Clk1	-	25
chr1	58419738	58419744	cluster:2179	88	-	chr1	58410189	58424066	ENSMUSG00000026034	Clk1	-	6
chr1	58419782	58419789	cluster:2180	24	-	chr1	58410189	58424066	ENSMUSG00000026034	Clk1	-	7
chr1	58419806	58419808	cluster:2181	44	-	chr1	58410189	58424066	ENSMUSG00000026034	Clk1	-	2
chr1	58419820	58419838	cluster:2182	40	-	chr1	58410189	58424066	ENSMUSG00000026034	Clk1	-	18
chr1	58419864	58419896	cluster:2183	61	-	chr1	58410189	58424066	ENSMUSG00000026034	Clk1	-	32
chr1	58419908	58419922	cluster:2184	125	-	chr1	58410189	58424066	ENSMUSG00000026034	Clk1	-	14
chr1	58419937	58420013	cluster:2185	133	-	chr1	58410189	58424066	ENSMUSG00000026034	Clk1	-	76
chr1	58420049	58420054	cluster:2186	10	-	chr1	58410189	58424066	ENSMUSG00000026034	Clk1	-	5
chr1	58420081	58420119	cluster:2187	44	-	chr1	58410189	58424066	ENSMUSG00000026034	Clk1	-	38
chr1	58420145	58420189	cluster:2188	51	-	chr1	58410189	58424066	ENSMUSG00000026034	Clk1	-	44
chr1	58420217	58420225	cluster:2189	21	-	chr1	58410189	58424066	ENSMUSG00000026034	Clk1	-	8
chr1	58420259	58420271	cluster:2190	27	-	chr1	58410189	58424066	ENSMUSG00000026034	Clk1	-	12
chr1	58420287	58420296	cluster:2191	35	-	chr1	58410189	58424066	ENSMUSG00000026034	Clk1	-	9
chr1	58420312	58420340	cluster:2192	49	-	chr1	58410189	58424066	ENSMUSG00000026034	Clk1	-	28
chr1	58420355	58420361	cluster:2193	43	-	chr1	58410189	58424066	ENSMUSG00000026034	Clk1	-	6
chr1	58420390	58420392	cluster:2194	14	-	chr1	58410189	58424066	ENSMUSG00000026034	Clk1	-	2
chr1	58420422	58420443	cluster:2195	65	-	chr1	58410189	58424066	ENSMUSG00000026034	Clk1	-	21
chr1	58420454	58420469	cluster:2196	55	-	chr1	58410189	58424066	ENSMUSG00000026034	Clk1	-	15
chr1	58420495	58420517	cluster:2197	36	-	chr1	58410189	58424066	ENSMUSG00000026034	Clk1	-	22
chr1	58420531	58420535	cluster:2198	27	-	chr1	58410189	58424066	ENSMUSG00000026034	Clk1	-	4
chr1	58420592	58420603	cluster:2199	101	-	chr1	58410189	58424066	ENSMUSG00000026034	Clk1	-	11
chr1	58420620	58420640	cluster:2200	114	-	chr1	58410189	58424066	ENSMUSG00000026034	Clk1	-	20
chr1	58420654	58420691	cluster:2201	115	-	chr1	58410189	58424066	ENSMUSG00000026034	Clk1	-	37
[truncated: 149,512 more rows]

## Sheet: RRM2-4 Repeats
Repeat	RT_amounts	mean_RNAexp	normed_binding	chr	start	end	strand
rep_100004_L1MB3_LINE/L1	36	356.5	0.100982	chr2	34712126	34712584	-
rep_1003242_B4_SINE/B4	83	35	2.37143	chr14	75203428	75203545	-
rep_1004453_AT_rich_Low_complexity	212	19.5	10.8718	chr14	76819784	76819804	+
rep_1005229_L1Md_F2_LINE/L1	42	120	0.35	chr14	77926493	77927576	-
rep_1008234_MuRRS4-int_LTR/ERV1	52	53.5	0.971963	chr14	87485994	87486221	+
rep_1008347_T-rich_Low_complexity	69	23	3	chr14	87816479	87816539	+
rep_1008353_B1F_SINE/Alu	47	23	2.04348	chr14	87818072	87818196	-
rep_1009449_AT_rich_Low_complexity	272	135	2.01481	chr14	99714205	99714240	+
rep_1012062_T-rich_Low_complexity	56	91.5	0.612022	chr14	105695663	105695766	+
rep_1012785_MMETn-int_LTR/ERVK	171	81.5	2.09816	chr14	119046380	119047713	+
rep_1013580_B1_Mm_SINE/Alu	161	17	9.47059	chr14	120884390	120884473	+
rep_1015002_B1_Mus2_SINE/Alu	34	86.5	0.393064	chr14	122289649	122289793	-
rep_1016262_L1Md_F2_LINE/L1	51	29.5	1.72881	chr14	123142529	123143018	+
rep_1017954_AT_rich_Low_complexity	120	5.5	21.8182	chr15	7142604	7142636	+
rep_1018611_B1_Mm_SINE/Alu	95	200.5	0.473815	chr15	8108587	8108709	+
rep_1019348_ETnERV-int_LTR/ERVK	311	9.5	32.7368	chr15	8771565	8771650	-
rep_1019349_RLTR13G_LTR/ERVK	350	31	11.2903	chr15	8771651	8771825	-
rep_1019626_AT_rich_Low_complexity	55	9	6.11111	chr15	9131314	9131336	+
rep_1020003_ORR1D2-int_LTR/ERVL-MaLR	55	54.5	1.00917	chr15	10555328	10556104	-
rep_1020363_PB1D10_SINE/Alu	45	1883	0.023898	chr15	11922136	11922206	-
rep_1020855_AT_rich_Low_complexity	52	120	0.433333	chr15	12264890	12264911	+
rep_1021483_RLTR1B-int_LTR/ERV1	40	78.5	0.509554	chr15	22629952	22630182	-
rep_1021484_RLTR1B-int_LTR/ERV1	40	207.5	0.192771	chr15	22630174	22632928	-
rep_1021983_B3_SINE/B2	110	137	0.80292	chr15	25740641	25740820	+
rep_1025329_PB1D10_SINE/Alu	42	113.5	0.370044	chr15	34047347	34047449	+
rep_1026571_L1VL4_LINE/L1	52	57	0.912281	chr15	35502611	35503437	-
rep_1027594_MIR_SINE/MIR	194	870	0.222989	chr15	36700529	36700568	-
rep_1027595_L2c_LINE/L2	343	1508	0.227454	chr15	36700535	36700629	-
rep_1028205_B4A_SINE/B4	65	580	0.112069	chr15	37915245	37915462	-
rep_1028240_RSINE1_SINE/B4	120	672.5	0.178439	chr15	37934947	37935092	-
rep_1028384_MIRb_SINE/MIR	49	27	1.81481	chr15	38009791	38009864	+
rep_1029034_IAPEz-int_LTR/ERVK	45	691	0.065123	chr15	39004937	39006208	+
rep_1029035_IAPEz-int_LTR/ERVK	59	829	0.0711701	chr15	39006208	39009449	+
rep_1029129_RLTR1B-int_LTR/ERV1	180	668	0.269461	chr15	39074255	39074670	-
rep_1029130_RLTR1B-int_LTR/ERV1	647	2296	0.281794	chr15	39074658	39076080	-
rep_1029132_RLTR1B-int_LTR/ERV1	196	1137	0.172383	chr15	39076103	39076940	-
rep_1029133_RMER16-int_LTR/ERVK	302	380	0.794737	chr15	39076932	39077681	-
rep_1029134_RMER16-int_LTR/ERVK	153	258.5	0.591876	chr15	39077668	39077858	-
rep_1030702_Lx5_LINE/L1	86	23.5	3.65957	chr15	50565529	50565918	-
rep_1035097_Charlie5_DNA/hAT-Charlie	147	52.5	2.8	chr15	61877123	61877334	+
rep_1035249_AT_rich_Low_complexity	48	34	1.41176	chr15	61933356	61933386	+
rep_1035273_MT2B_LTR/ERVL	151	40	3.775	chr15	61945515	61945658	+
rep_1035274_B1_Mur4_SINE/Alu	151	40	3.775	chr15	61945535	61945688	+
rep_1035413_MER82_DNA/TcMar-Tigger	107	44.5	2.40449	chr15	62027608	62027928	+
rep_1036798_GC_rich_Low_complexity	76	9.5	8	chr15	68090170	68090210	+
rep_1037792_PB1D10_SINE/Alu	37	36	1.02778	chr15	72874462	72874557	+
rep_1038258_B2_Mm1t_SINE/B2	175	122.5	1.42857	chr15	73156793	73156981	-
rep_1038913_GC_rich_Low_complexity	67	19	3.52632	chr15	73578785	73578865	+
rep_1039522_ORR1A4-int_LTR/ERVL-MaLR	265	96	2.76042	chr15	75711713	75712180	-
rep_1042543_MIRb_SINE/MIR	58	56	1.03571	chr15	78824642	78824868	-
rep_1043387_L2_LINE/L2	125	449.5	0.278087	chr15	79360004	79360043	-
rep_1043396_B1_Mus2_SINE/Alu	260	641.5	0.4053	chr15	79365602	79365739	-
rep_1043402_B1_Mus2_SINE/Alu	122	684	0.178363	chr15	79368197	79368273	-
rep_1044293_ID_B1_SINE/B4	66	33.5	1.97015	chr15	79792487	79792607	-
rep_1047110_B3_SINE/B2	72	45.5	1.58242	chr15	81282431	81282630	-
rep_1048922_B3_SINE/B2	34	10	3.4	chr15	82019416	82019512	+
rep_1049353_L1MC4_LINE/L1	66	55	1.2	chr15	82695024	82695454	-
rep_1049425_B1_Mur1_SINE/Alu	115	23	5	chr15	82722011	82722142	-
rep_1050139_RMER10B_LTR/ERVL	53	64	0.828125	chr15	83268084	83268448	+
rep_1053308_ORR1A2-int_LTR/ERVL-MaLR	54	2000	0.027	chr15	88539099	88540909	+
rep_1055830_B2_Mm1a_SINE/B2	246	89	2.76404	chr15	93254708	93254884	-
rep_1057909_AT_rich_Low_complexity	45	165.5	0.271903	chr15	97208748	97208771	+
rep_1060130_PB1D9_SINE/Alu	69	475	0.145263	chr15	99228393	99228482	+
rep_1060959_L2_LINE/L2	56	133	0.421053	chr15	99674141	99674214	-
rep_1061949_MMERVK9C_I-int_LTR/ERVK	33	1073	0.0307549	chr15	100100625	100102805	+
rep_1062203_B1F_SINE/Alu	46	41	1.12195	chr15	100313751	100313860	+
rep_106272_AT_rich_Low_complexity	86	379.5	0.226614	chr2	51930502	51930529	+
rep_1062754_B1F1_SINE/Alu	33	26.5	1.24528	chr15	100620545	100620597	-
rep_1062779_B1_Mus2_SINE/Alu	273	30.5	8.95082	chr15	100634389	100634493	-
rep_1063236_B3_SINE/B2	87	690.5	0.125996	chr15	101924165	101924237	+
rep_106341_URR1B_DNA/hAT-Charlie	71	556	0.127698	chr2	51956763	51956932	+
rep_106395_MTD_LTR/ERVL-MaLR	190	82	2.31707	chr2	51982541	51982836	+
rep_106397_L1Md_F_LINE/L1	114	465	0.245161	chr2	51982915	51985375	+
rep_106403_PB1D9_SINE/Alu	56	33	1.69697	chr2	51987410	51987519	+
rep_106404_MTD-int_LTR/ERVL-MaLR	43	70.5	0.609929	chr2	51987542	51987979	+
rep_1064046_AT_rich_Low_complexity	98	114	0.859649	chr15	102261870	102261906	+
rep_106405_MTD-int_LTR/ERVL-MaLR	83	47	1.76596	chr2	51987997	51988290	+
rep_1064140_AT_rich_Low_complexity	66	348.5	0.189383	chr15	102305844	102305869	+
rep_1064179_AT_rich_Low_complexity	80	459	0.174292	chr15	102319120	102319141	+
rep_1064720_MTE-int_LTR/ERVL-MaLR	165	862	0.191415	chr15	103023373	103023487	-
rep_1064725_B1_Mur1_SINE/Alu	117	1087	0.107636	chr15	103026736	103026876	-
rep_1064791_B4A_SINE/B4	40	27.5	1.45455	chr15	103042390	103042638	-
rep_1064900_AT_rich_Low_complexity	138	5	27.6	chr15	103077094	103077123	+
rep_1068991_RSINE1_SINE/B4	120	53	2.26415	chr16	10580353	10580490	-
rep_1069342_GSAT_MM_Satellite	187	21.5	8.69767	chr16	10975161	10975376	-
rep_1069703_B1_Mur3_SINE/Alu	82	2525.5	0.0324688	chr16	11193428	11193510	-
rep_1070972_L1MB5_LINE/L1	413	10.5	39.3333	chr16	13369294	13369375	-
rep_107100_L1MA4A_LINE/L1	38	270	0.140741	chr2	53026372	53026513	-
rep_1071685_URR1B_DNA/hAT-Charlie	77	343.5	0.224163	chr16	13782554	13782763	-
rep_1071919_B1_Mus1_SINE/Alu	29	128.5	0.225681	chr16	13861965	13862082	-
rep_1072617_AT_rich_Low_complexity	24	55	0.436364	chr16	14192892	14192919	+
rep_1073219_L1MB3_LINE/L1	50	50	1	chr16	15652700	15653016	+
rep_1073446_AT_rich_Low_complexity	62	18.5	3.35135	chr16	15733680	15733724	+
rep_1074960_T-rich_Low_complexity	43	591	0.072758	chr16	17030419	17030456	+
rep_1074976_T-rich_Low_complexity	72	601	0.1198	chr16	17035129	17035187	+
rep_1076925_ORR1D2_LTR/ERVL-MaLR	35	132.5	0.264151	chr16	18265357	18265667	-
rep_1076985_MIR_SINE/MIR	44	65.5	0.671756	chr16	18287506	18287651	-
rep_107816_MLT1D-int_LTR/ERVL-MaLR	33	156	0.211538	chr2	59074672	59075745	+
rep_1079167_PB1D10_SINE/Alu	108	617	0.175041	chr16	20690265	20690358	+
rep_1079346_ID_B1_SINE/B4	23	11.5	2	chr16	21440377	21440482	+
rep_1080083_CT-rich_Low_complexity	85	56	1.51786	chr16	22040756	22040828	+
rep_1080096_AT_rich_Low_complexity	41	23.5	1.74468	chr16	22047653	22047684	+
rep_1082722_RLTR17B_Mm_LTR/ERVK	26	4	6.5	chr16	30164740	30164754	-
rep_1084775_B2_Mm1t_SINE/B2	52	32.5	1.6	chr16	31988364	31988494	+
rep_1085208_IAPEz-int_LTR/ERVK	83	727.5	0.114089	chr16	32148531	32149788	+
rep_1085232_MER5B_DNA/hAT-Charlie	77638	66.5	1167.49	chr16	32230611	32230727	+
rep_1086044_RMER6B_LTR/ERVK	84	495	0.169697	chr16	32623918	32624312	+
rep_1086386_AT_rich_Low_complexity	61	69	0.884058	chr16	32907906	32907927	+
rep_1089013_MTA_Mm-int_LTR/ERVL-MaLR	29	146	0.19863	chr16	35027247	35028251	-
rep_1089946_RMER19A_LTR/ERVK	41	192	0.213542	chr16	35789902	35790557	+
rep_1090585_IAPLTR1_Mm_LTR/ERVK	99	185.5	0.533693	chr16	36770041	36770438	-
rep_1093150_AT_rich_Low_complexity	91	376.5	0.2417	chr16	44160048	44160068	+
rep_1100219_B1_Mm_SINE/Alu	61	65	0.938462	chr16	87396819	87396955	-
rep_1100420_B3A_SINE/B2	209	1654	0.12636	chr16	87493238	87493373	-
rep_1101289_Lx7_LINE/L1	42	40.5	1.03704	chr16	90258723	90258898	-
rep_1102637_A-rich_Low_complexity	120	275.5	0.435572	chr16	91654954	91654995	+
rep_1105356_Tigger5_DNA/TcMar-Tigger	56	24	2.33333	chr16	98053988	98054202	-
rep_1105566_MMSAT4_Satellite	43	116.5	0.369099	chr16	98231369	98231581	+
rep_1105568_MMSAT4_Satellite	183	288.5	0.634315	chr16	98232032	98232589	+
rep_1105572_CT-rich_Low_complexity	176	30.5	5.77049	chr16	98233965	98234049	+
rep_1105573_L1Md_F_LINE/L1	116	258.5	0.448743	chr16	98234099	98235564	+
rep_1105610_MMSAT4_Satellite	65	13	5	chr16	98286020	98286326	-
rep_1106225_ID_B1_SINE/B4	29	8	3.625	chr17	5066718	5066781	-
rep_1107173_AT_rich_Low_complexity	50	4.5	11.1111	chr17	6156556	6156601	+
rep_1108064_LTRIS2_LTR/ERV1	34	28.5	1.19298	chr17	6786400	6786888	-
rep_1110474_MMETn-int_LTR/ERVK	4103	5257.5	0.780409	chr17	14231722	14236108	+
rep_1110476_RLTR13G_LTR/ERVK	161	33.5	4.80597	chr17	14236243	14236485	+
rep_1110477_MMETn-int_LTR/ERVK	78	118	0.661017	chr17	14236486	14236572	+
rep_1110681_RLTR1B-int_LTR/ERV1	127	91.5	1.38798	chr17	15191241	15191850	-
rep_1110683_RLTR1B-int_LTR/ERV1	188	46.5	4.04301	chr17	15191883	15192241	-
rep_1111500_RMER10A_LTR/ERVL	75	68.5	1.09489	chr17	17260674	17261088	+
rep_1111557_MMSAT4_Satellite	26	248	0.104839	chr17	17283479	17283784	+
rep_1111737_RLTR44C_LTR/ERVK	1274	31.5	40.4444	chr17	17378257	17378738	-
rep_1112866_MMSAT4_Satellite	46	181	0.254144	chr17	21955230	21956777	-
rep_1112968_MMSAT4_Satellite	31	450.5	0.0688124	chr17	22064526	22066079	-
rep_1113056_MMSAT4_Satellite	53	135.5	0.391144	chr17	22129427	22130618	+
rep_1113169_MMSAT4_Satellite	45	466	0.0965665	chr17	22423610	22425489	-
rep_1113267_MMSAT4_Satellite	25	193.5	0.129199	chr17	22512115	22513546	+
rep_1113322_MMSAT4_Satellite	68	112.5	0.604444	chr17	22591777	22592970	+
rep_1113376_MMSAT4_Satellite	194	766	0.253264	chr17	22850674	22852358	-
rep_1113416_MMSAT4_Satellite	63	118	0.533898	chr17	22914020	22915206	-
rep_1114034_T-rich_Low_complexity	47	172	0.273256	chr17	23949228	23949279	+
rep_1114040_Plat_L3_LINE/CR1	113	162	0.697531	chr17	23958871	23958962	+
rep_1114045_L2c_LINE/L2	316	428	0.738318	chr17	23959810	23960561	+
rep_1115028_Charlie12_DNA/hAT-Charlie	52	16.5	3.15152	chr17	24729059	24729244	+
rep_111712_MYSERV6-int_LTR/ERVK	72	28.5	2.52632	chr2	68713813	68713997	+
rep_1117812_MT2B_LTR/ERVL	87	72.5	1.2	chr17	27064614	27064731	+
rep_1117813_B1_Mur3_SINE/Alu	87	73	1.19178	chr17	27064627	27064768	+
rep_1119812_T-rich_Low_complexity	54	7155.5	0.00754664	chr17	28467356	28467439	+
rep_112039_MER34A1_LTR/ERV1	61	1338	0.0455904	chr2	69031933	69032391	-
rep_1121070_B1_Mus1_SINE/Alu	189	3116	0.0606547	chr17	29174469	29174586	+
rep_1124557_ORR1A1_LTR/ERVL-MaLR	97	141	0.687943	chr17	32138897	32139224	+
rep_1124978_B3_SINE/B2	54	17.5	3.08571	chr17	32393993	32394183	-
rep_1125272_MMETn-int_LTR/ERVK	698	26.5	26.3396	chr17	32506684	32507039	+
rep_1125273_MMETn-int_LTR/ERVK	8128	10203	0.796628	chr17	32507009	32512697	+
rep_1125274_ERVB4_1-LTR_MM_LTR/ERVK	721	1490	0.483893	chr17	32512698	32512796	+
rep_1125275_RLTR13G_LTR/ERVK	647	257	2.51751	chr17	32512826	32513057	+
rep_1125276_MMETn-int_LTR/ERVK	566	39	14.5128	chr17	32513058	32513144	+
rep_1125277_ERVB7_1-LTR_MM_LTR/ERVK	117	55	2.12727	chr17	32513145	32513461	+
rep_1126552_ORR1D1_LTR/ERVL-MaLR	72	111.5	0.64574	chr17	33799638	33799746	-
rep_1126953_T-rich_Low_complexity	31	1225	0.0253061	chr17	33969625	33969715	+
rep_1127070_B1_Mur4_SINE/Alu	91	28.5	3.19298	chr17	34016624	34016754	-
rep_1127071_MT2B_LTR/ERVL	91	29.5	3.08475	chr17	34016660	34016776	-
rep_1128021_B2_Mm1a_SINE/B2	32	364.5	0.0877915	chr17	35086102	35086292	+
rep_1128444_CT-rich_Low_complexity	78	961	0.0811655	chr17	35386023	35386087	+
rep_1128595_AT_rich_Low_complexity	138	3153.5	0.0437609	chr17	35644909	35644932	+
rep_1129200_L2a_LINE/L2	1348	7465.5	0.180564	chr17	35971757	35971835	-
rep_1129216_ID4_SINE/ID	109	14.5	7.51724	chr17	35980361	35980438	+
rep_1129257_PB1D9_SINE/Alu	69	238.5	0.289308	chr17	35994663	35994771	+
rep_1129264_L1MB5_LINE/L1	51	301	0.169435	chr17	35996343	35996602	+
rep_1129954_MTEb_LTR/ERVL-MaLR	149	111.5	1.33632	chr17	37104262	37104628	-
rep_1129994_MTEa_LTR/ERVL-MaLR	112	590	0.189831	chr17	37121801	37122002	-
rep_1130062_Tigger5_DNA/TcMar-Tigger	531	924	0.574675	chr17	37140929	37141162	+
rep_1130063_Tigger5_DNA/TcMar-Tigger	315	709.5	0.443975	chr17	37141160	37141259	+
rep_1130064_ID4_SINE/ID	245	602.5	0.406639	chr17	37141291	37141370	+
rep_1130176_CT-rich_Low_complexity	39	42	0.928571	chr17	37187350	37187492	+
rep_1130208_AT_rich_Low_complexity	81	51	1.58824	chr17	37203192	37203225	+
rep_1130209_AT_rich_Low_complexity	137	50	2.74	chr17	37203286	37203307	+
rep_1130236_RMER4A_LTR/ERVK	164	29	5.65517	chr17	37215602	37215867	+
rep_1130335_L1_Mus3_LINE/L1	63	54.5	1.15596	chr17	38137429	38137568	+
rep_1130356_RLTR25A_LTR/ERVK	95	54.5	1.74312	chr17	38144718	38145236	+
rep_1132597_MT2B_LTR/ERVL	229	505.5	0.453017	chr17	45573042	45573550	+
rep_1132598_MERVL_2A-int_LTR/ERVL	634	2824.5	0.224465	chr17	45573551	45576964	+
rep_11327_GA-rich_Low_complexity	77	65.5	1.17557	chr1	38092876	38092939	+
rep_1132897_B2_Mm2_SINE/B2	68	15.5	4.3871	chr17	45745009	45745194	-
[truncated: 1,434 more rows]

## Sheet: Full Length Repeats
Repeat	RT_amounts	mean_RNAexp	normed_binding	chr	start	end	strand
[truncated: 24,488 more rows]
