# Supplementary figures and images for: Spen links RNA-mediated endogenous retrovirus silencing and X chromosome inactivation
Source: eLife journal article supplement (doi:10.7554/elife.54508), 2020-05-07

Figure 1- figure supplement 1

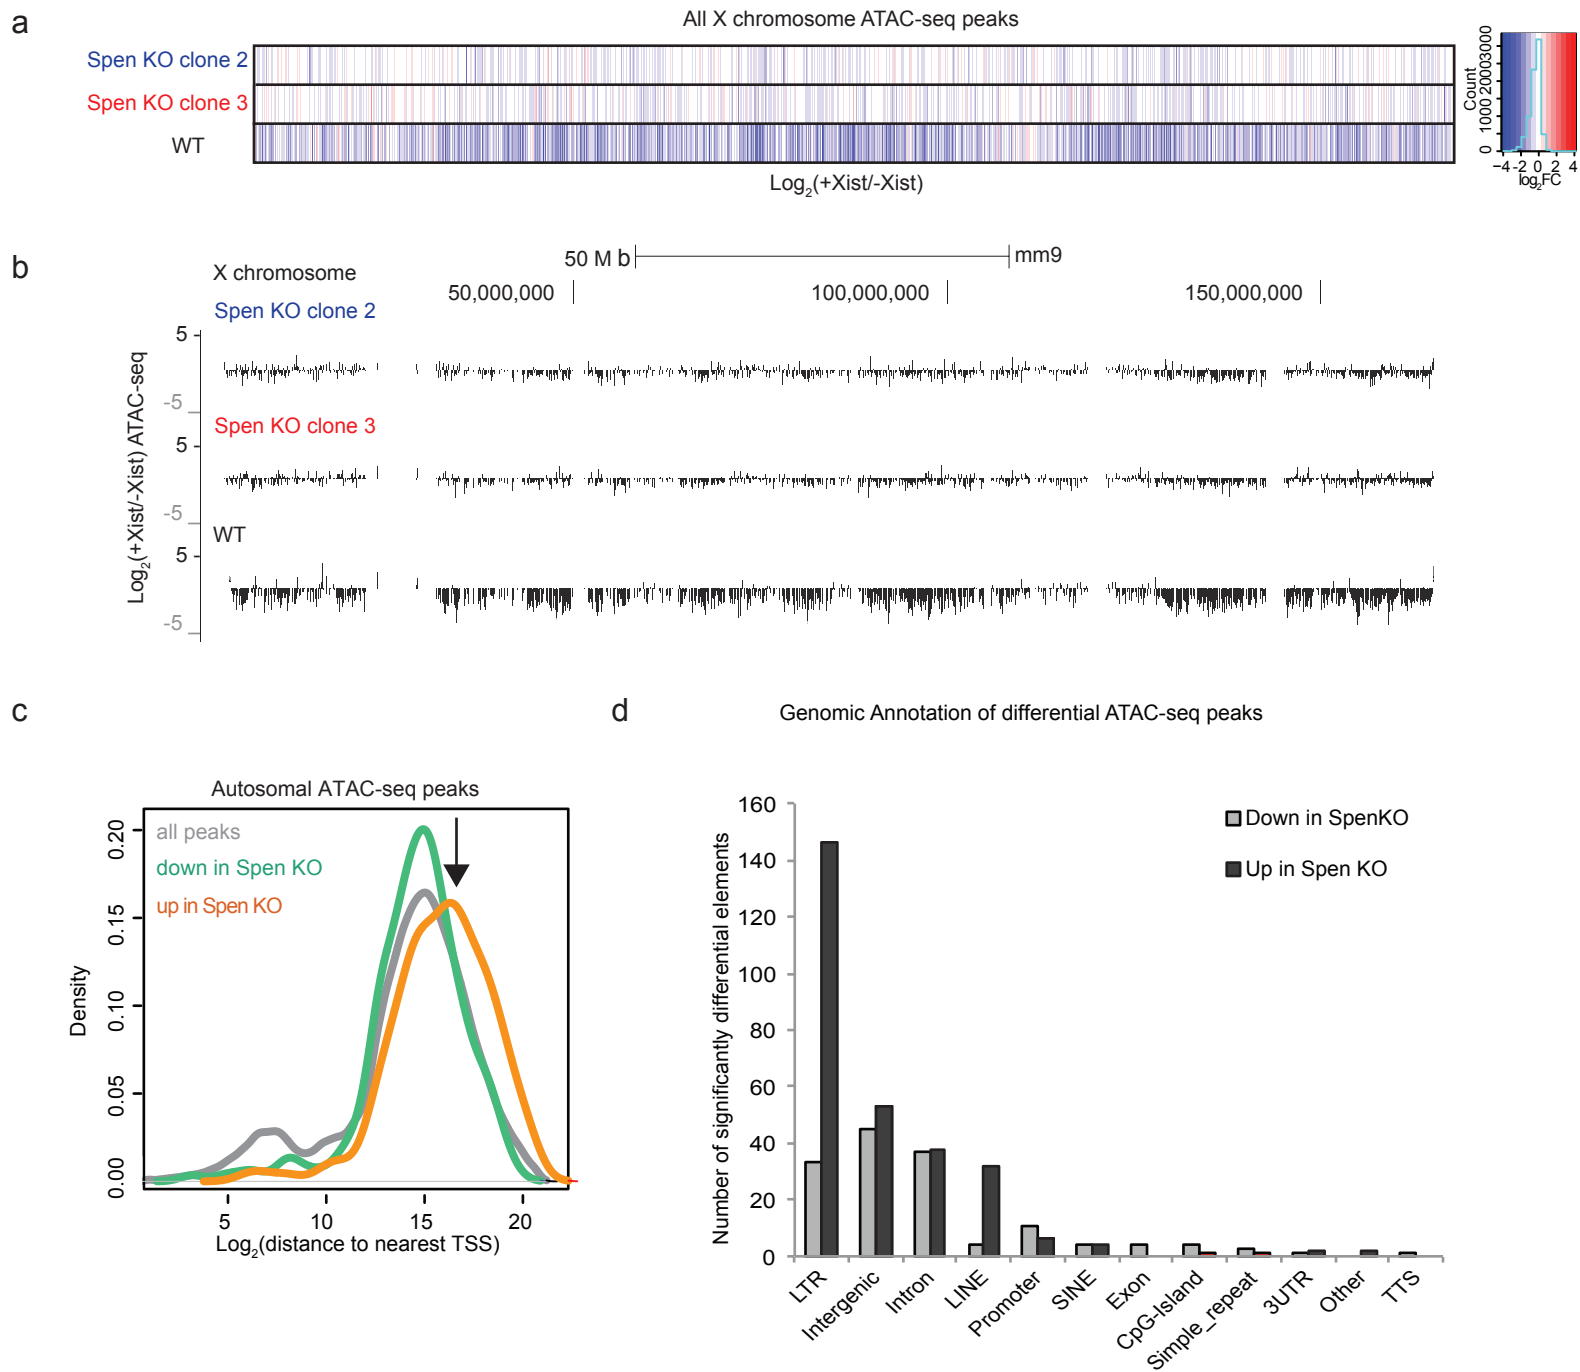

Supplement: supp [file elife_poa_e54508_Figure_1_figure_supplement_1.pdf › elife_poa_e54508_Figure_1_figure_supplement_1.pdf]

Figure 2- figure supplement 1

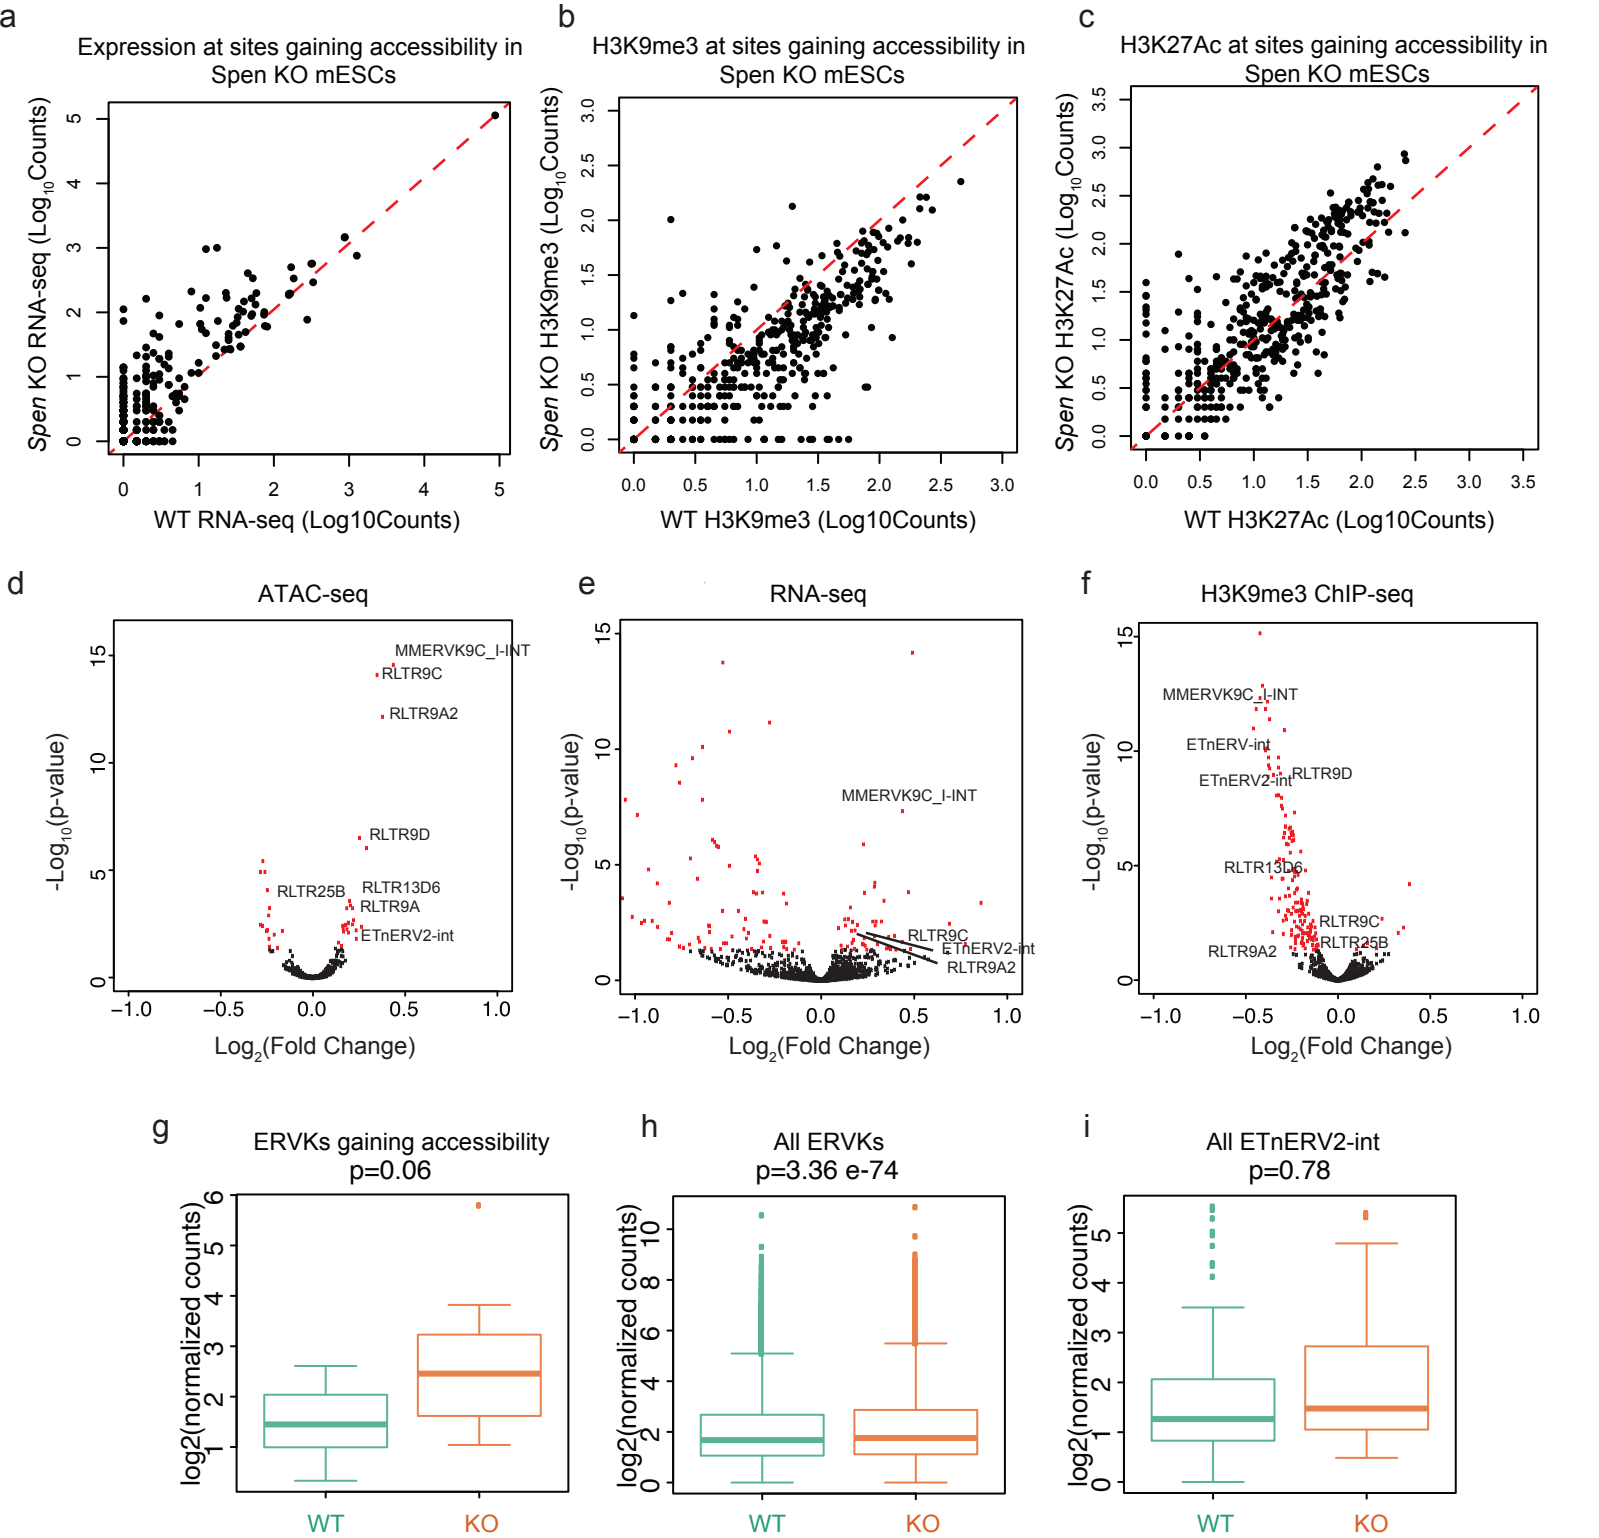

Supplement: supp [file elife_poa_e54508_Figure_2_figure_supplement_1.pdf › elife_poa_e54508_Figure_2_figure_supplement_1.pdf]

Figure 2-figure supplement 2

a

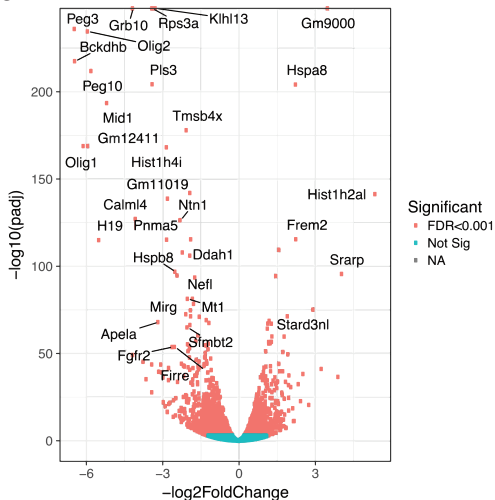

b

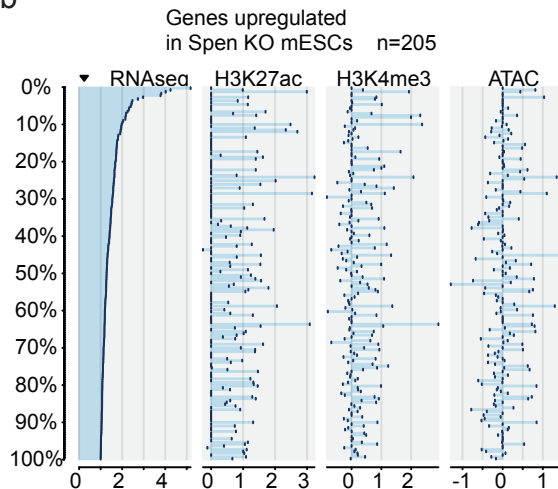

c

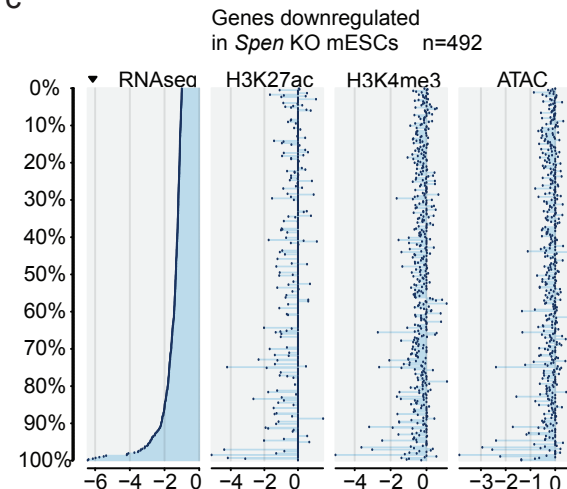

d

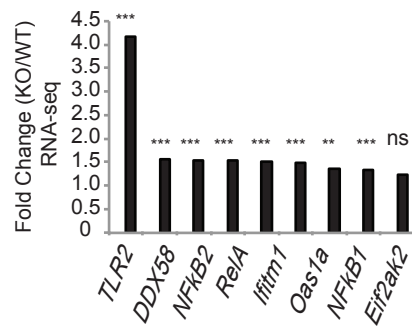

e

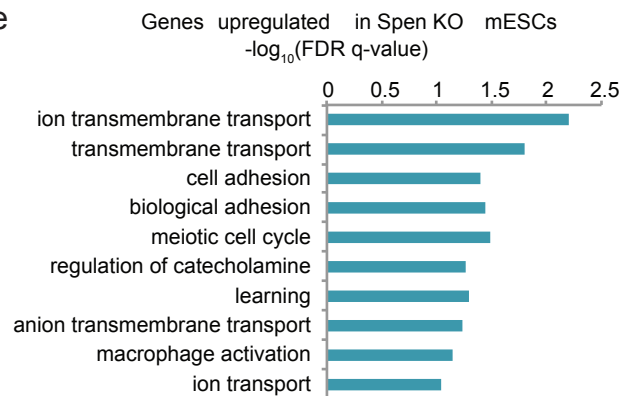

f

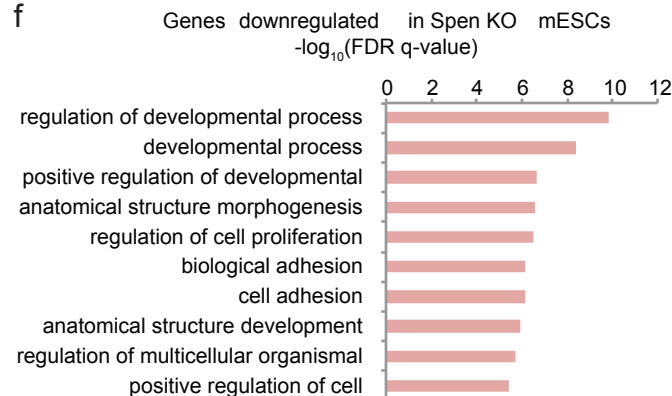

Supplement: supp [file elife_poa_e54508_Figure_2_figure_supplement_2.pdf › elife_poa_e54508_Figure_2_figure_supplement_2.pdf]

# Figure 2- figure supplement 3

a

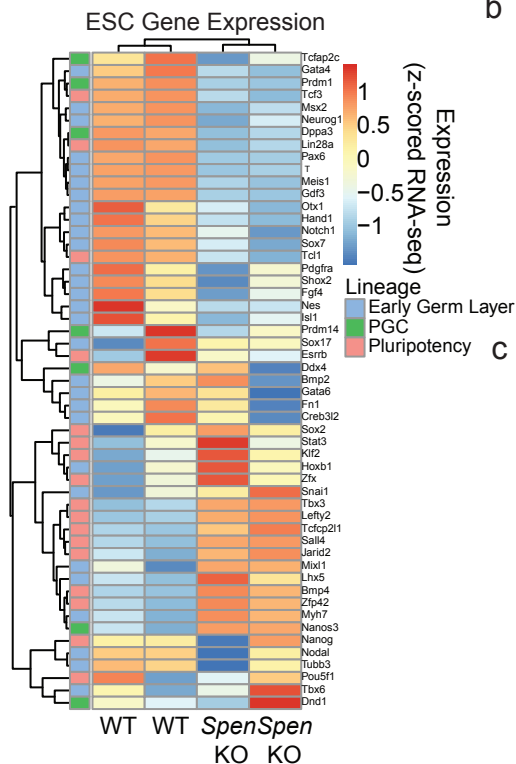

b

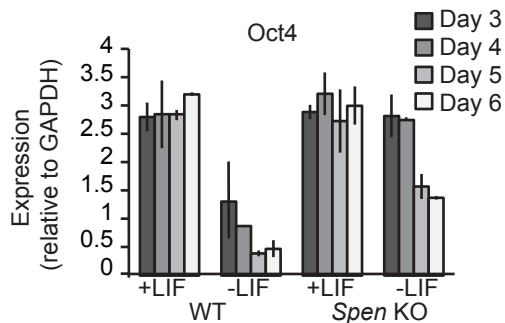

c

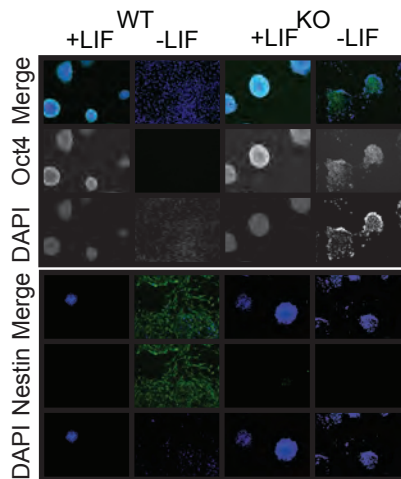

d

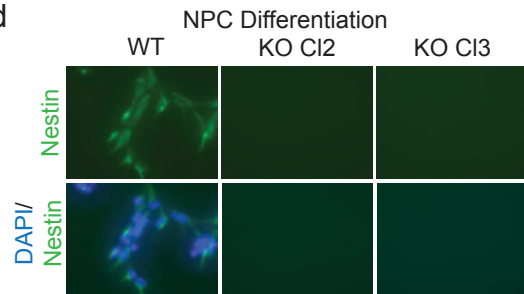

e

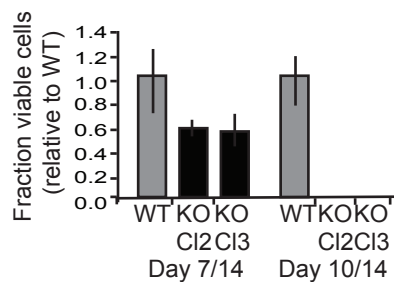

Supplement: supp [file elife_poa_e54508_Figure_2_figure_supplement_3.pdf › elife_poa_e54508_Figure_2_figure_supplement_3.pdf]

Figure 3- figure supplement 1

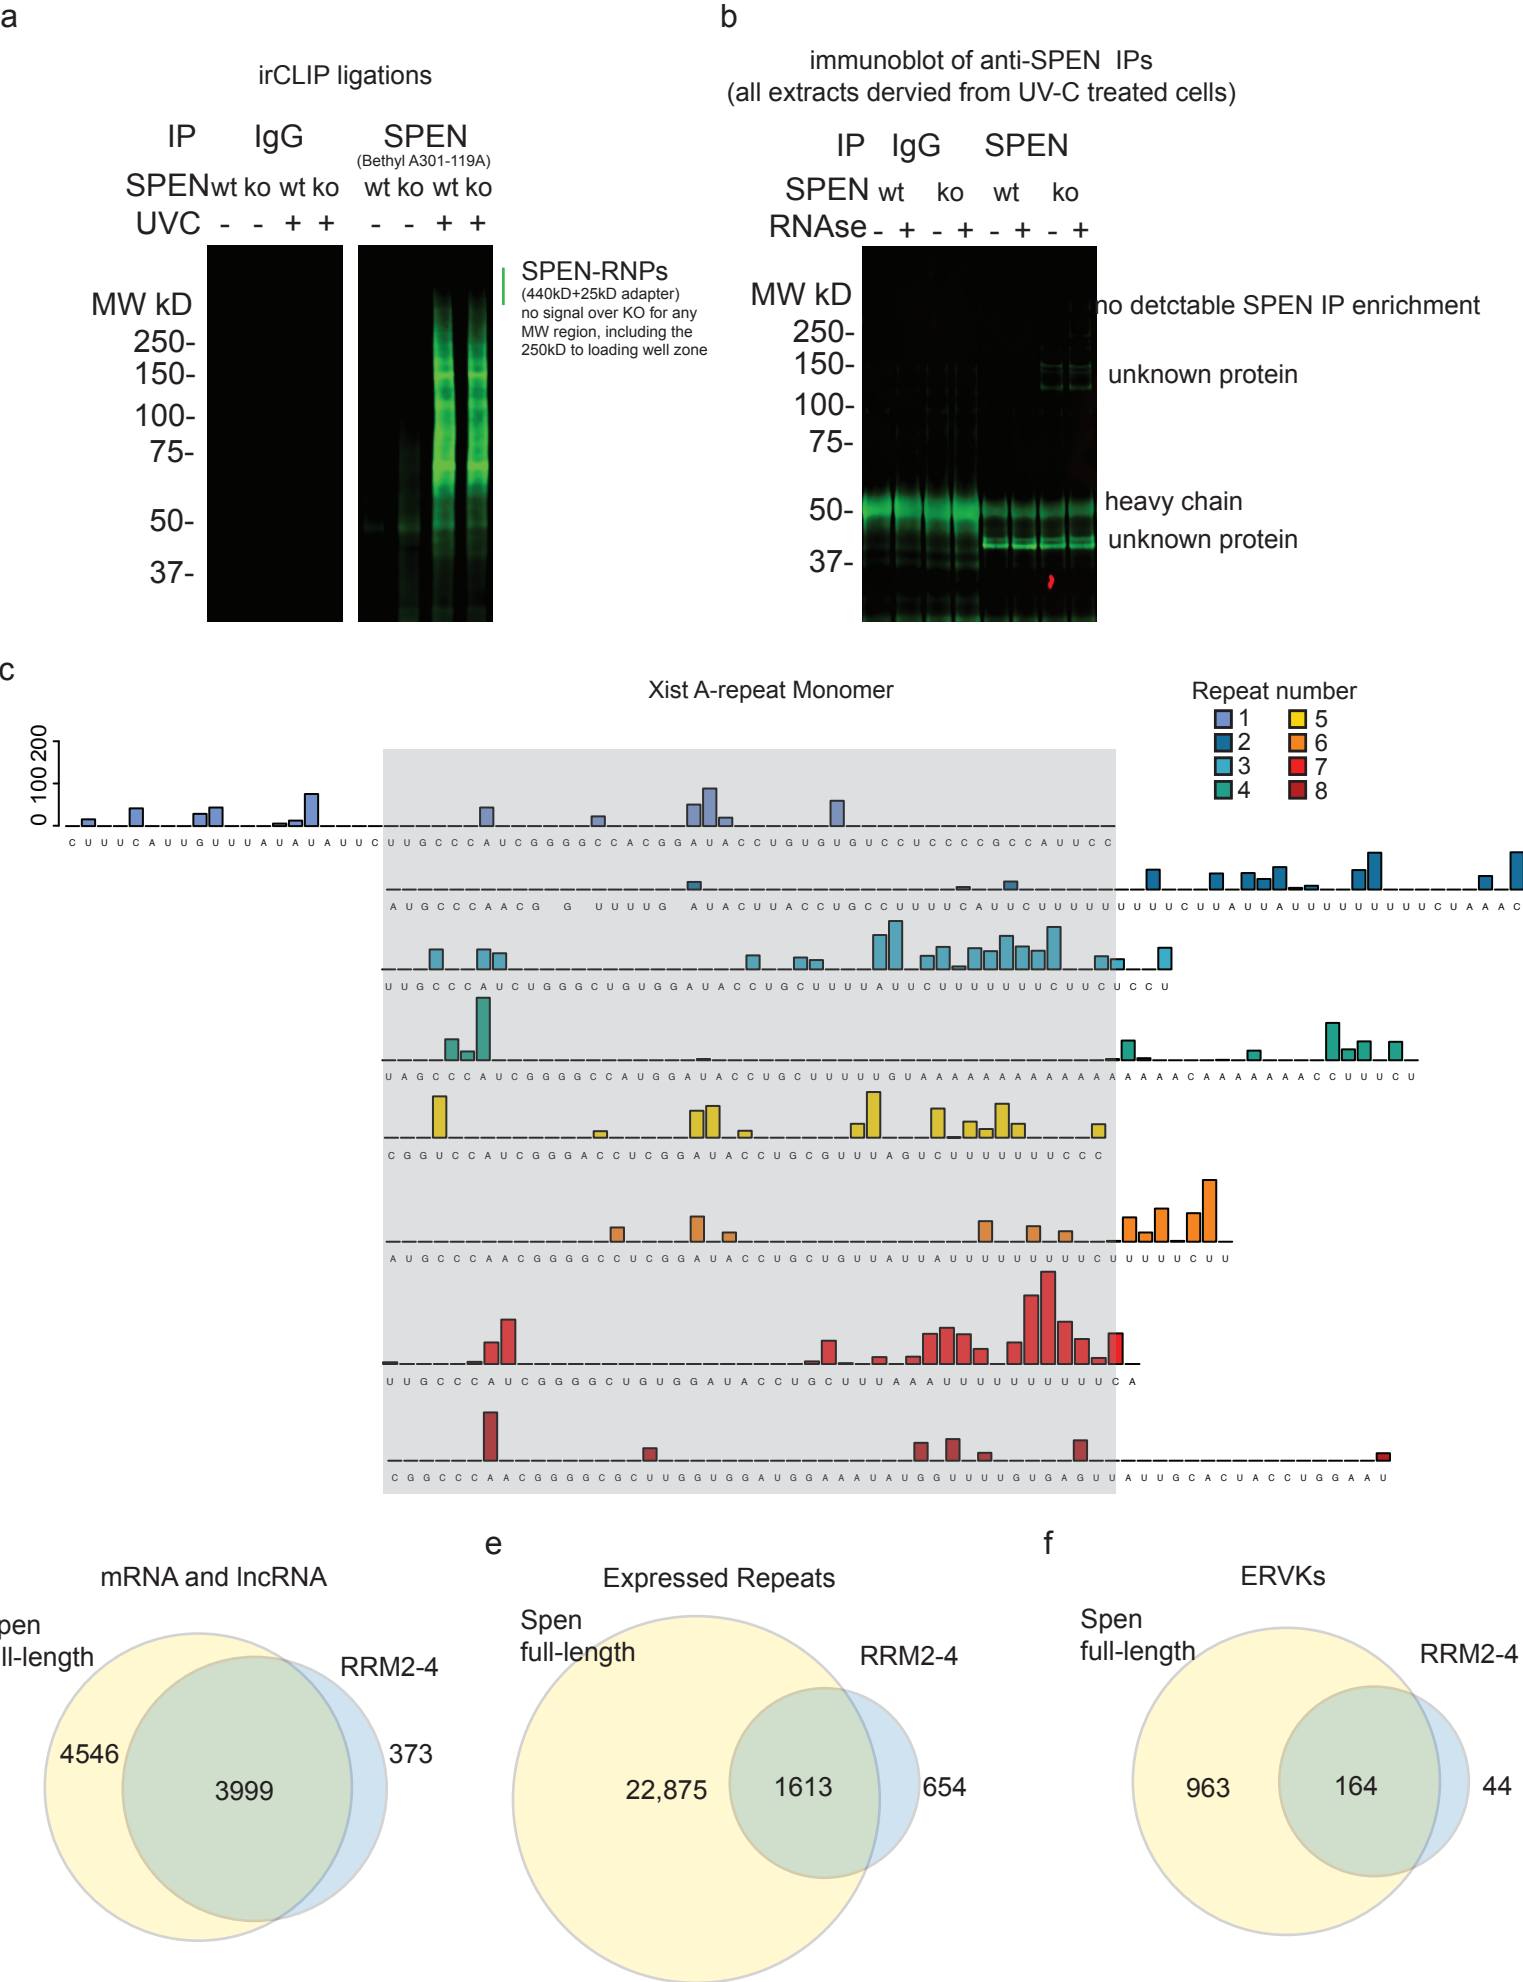

Supplement: supp [file elife_poa_e54508_Figure_3_figure_supplement_1.pdf › elife_poa_e54508_Figure_3_figure_supplement_1.pdf]

Figure 3- figure supplement 2

a

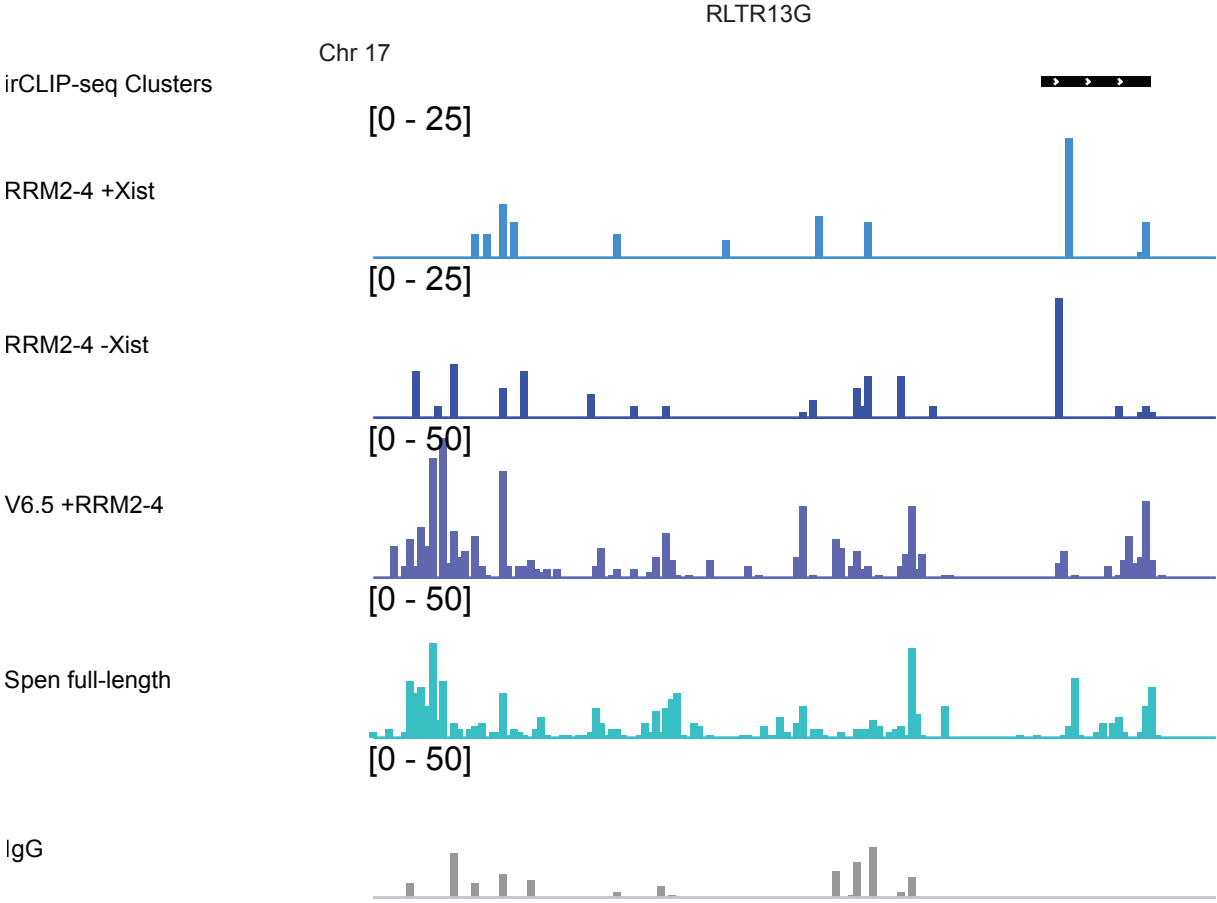

b

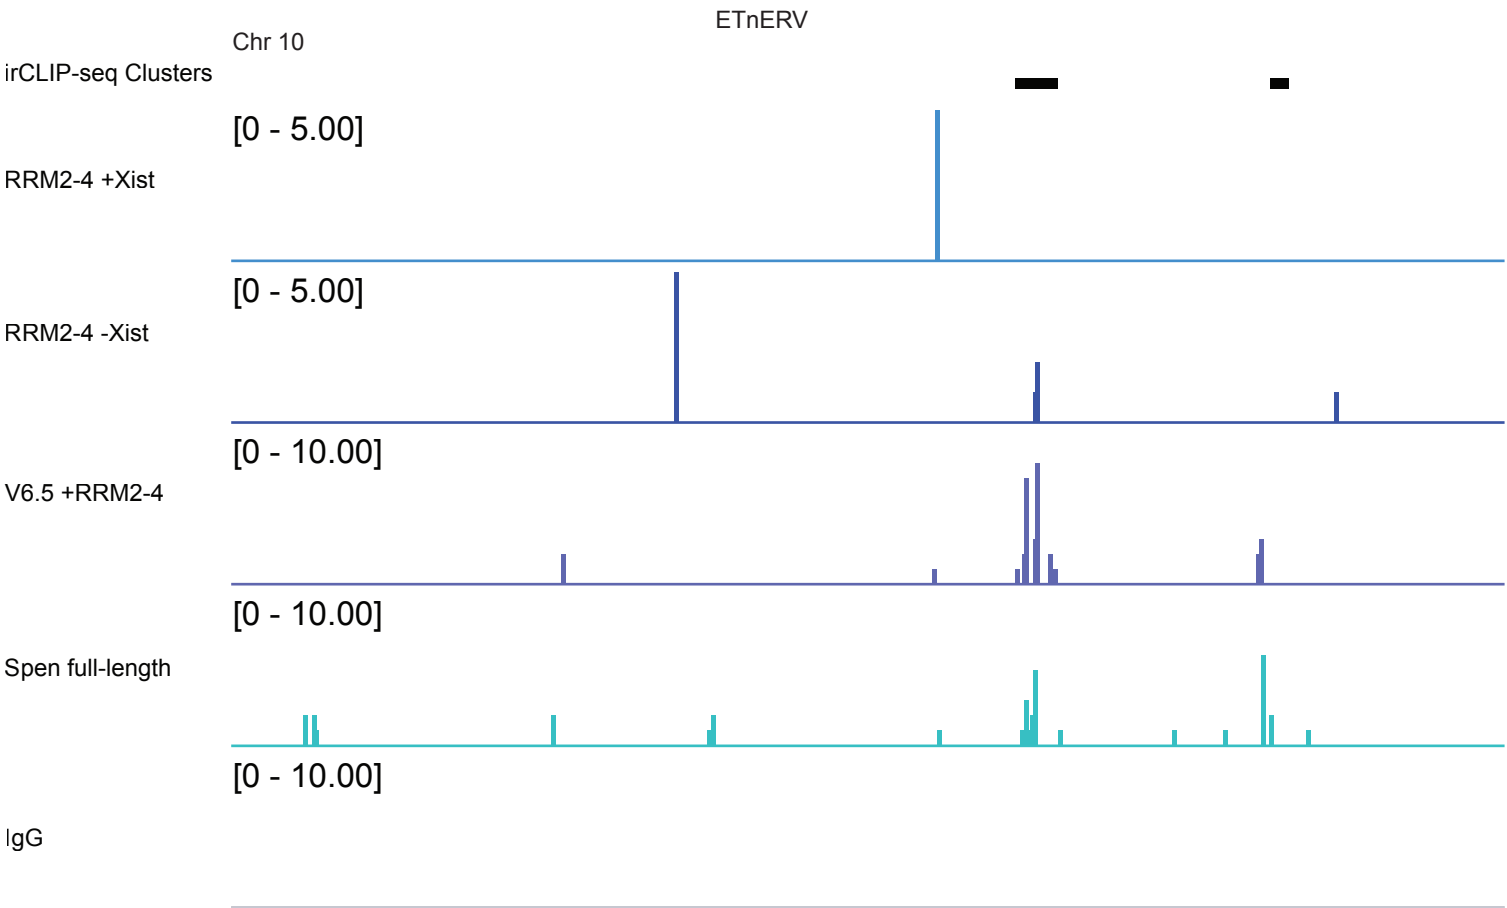

Supplement: supp [file elife_poa_e54508_Figure_3_figure_supplement_2.pdf › elife_poa_e54508_Figure_3_figure_supplement_2.pdf]

Figure 4- figure supplement 1

a RLTR13G

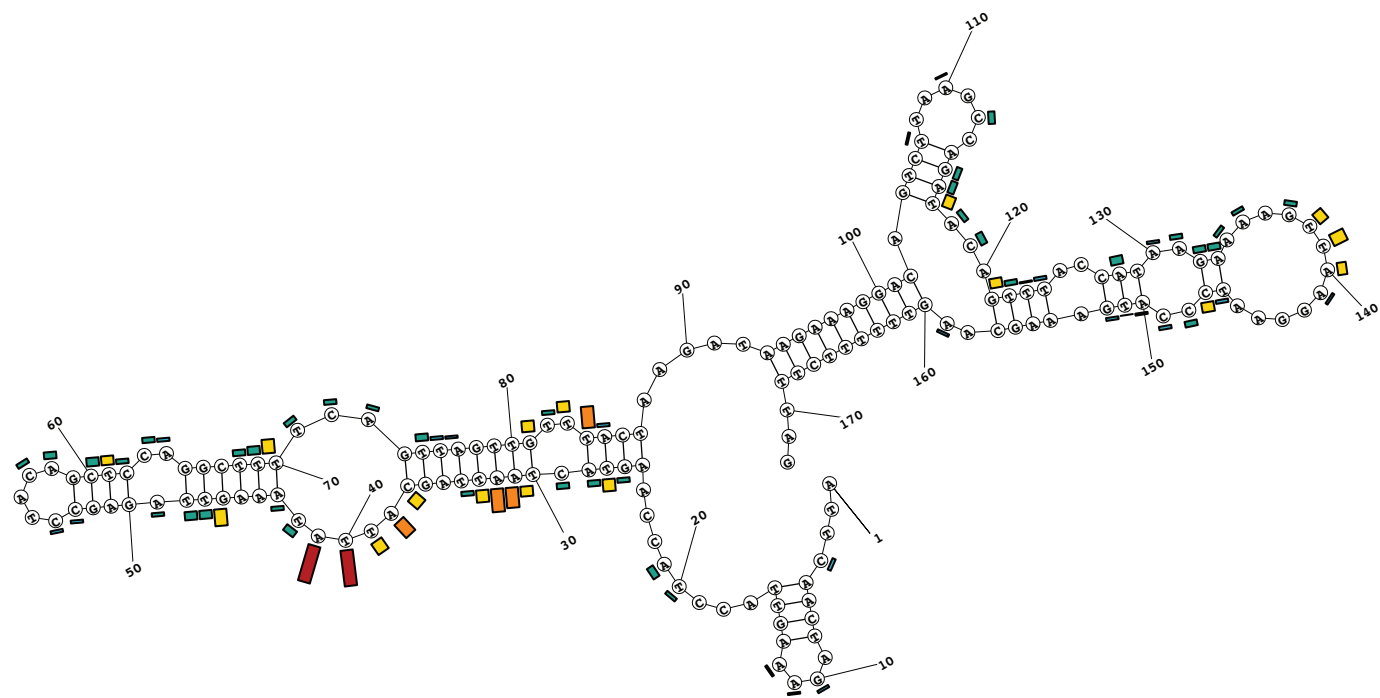

b MMETn-Int

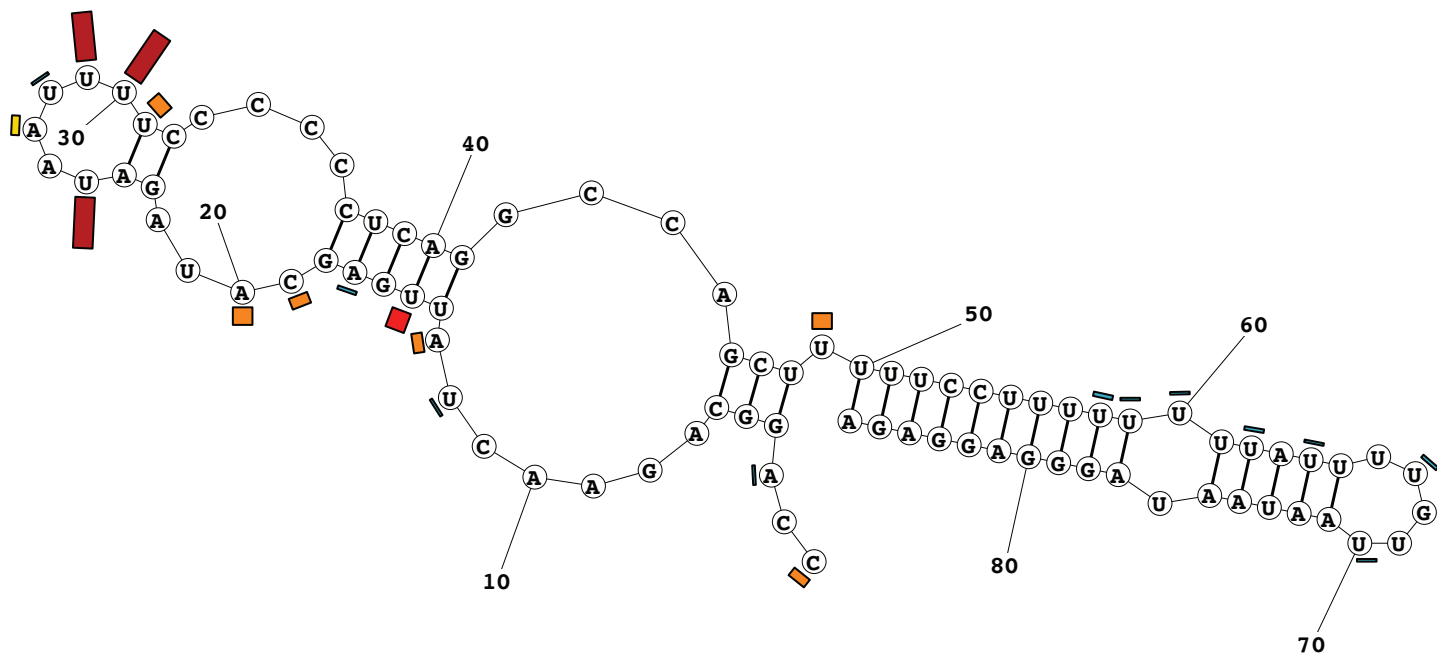

Supplement: supp [file elife_poa_e54508_Figure_4_figure_supplement_1.pdf › elife_poa_e54508_Figure_4_figure_supplement_1.pdf]

Figure 4- figure supplement 2

a

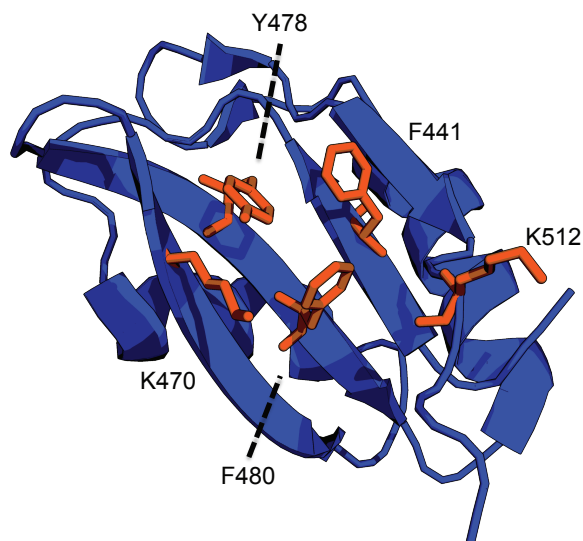

b

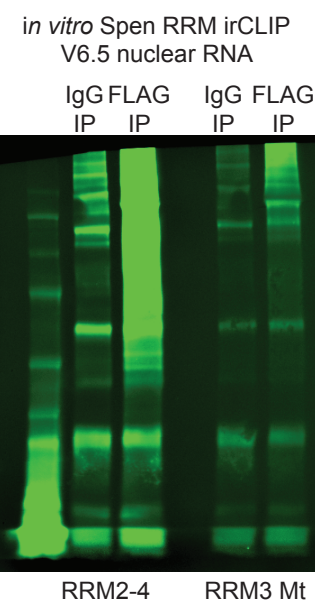

c

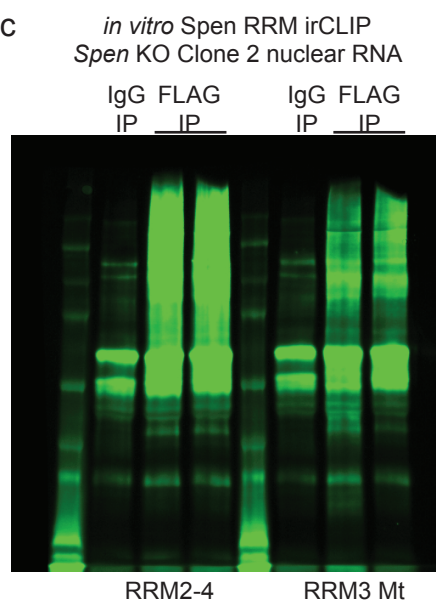

d

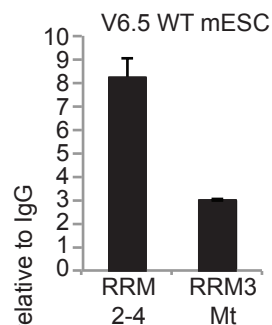

e

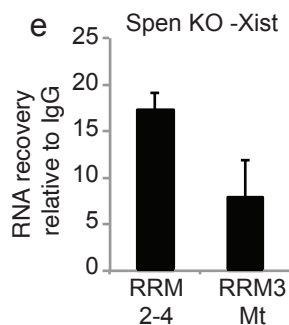

f

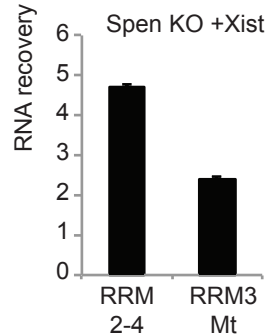

g

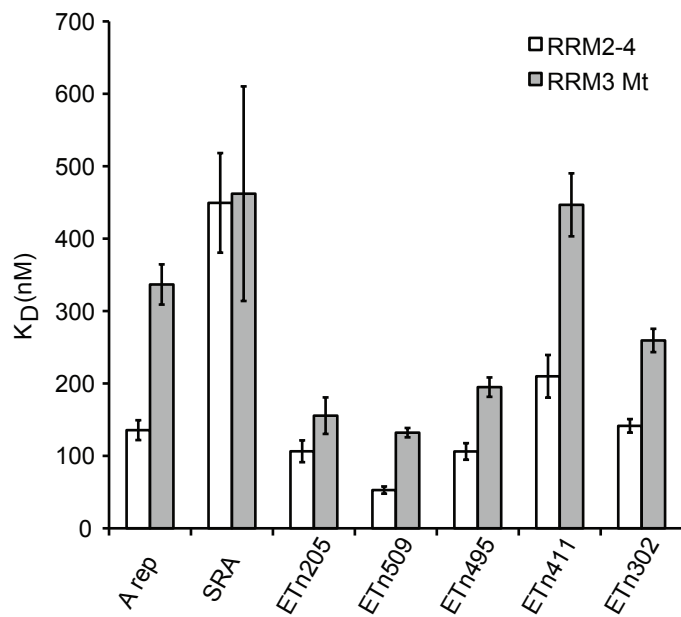

Supplement: supp [file elife_poa_e54508_Figure_4_figure_supplement_2.pdf › elife_poa_e54508_Figure_4_figure_supplement_2.pdf]

Figure 6- figure supplement 1

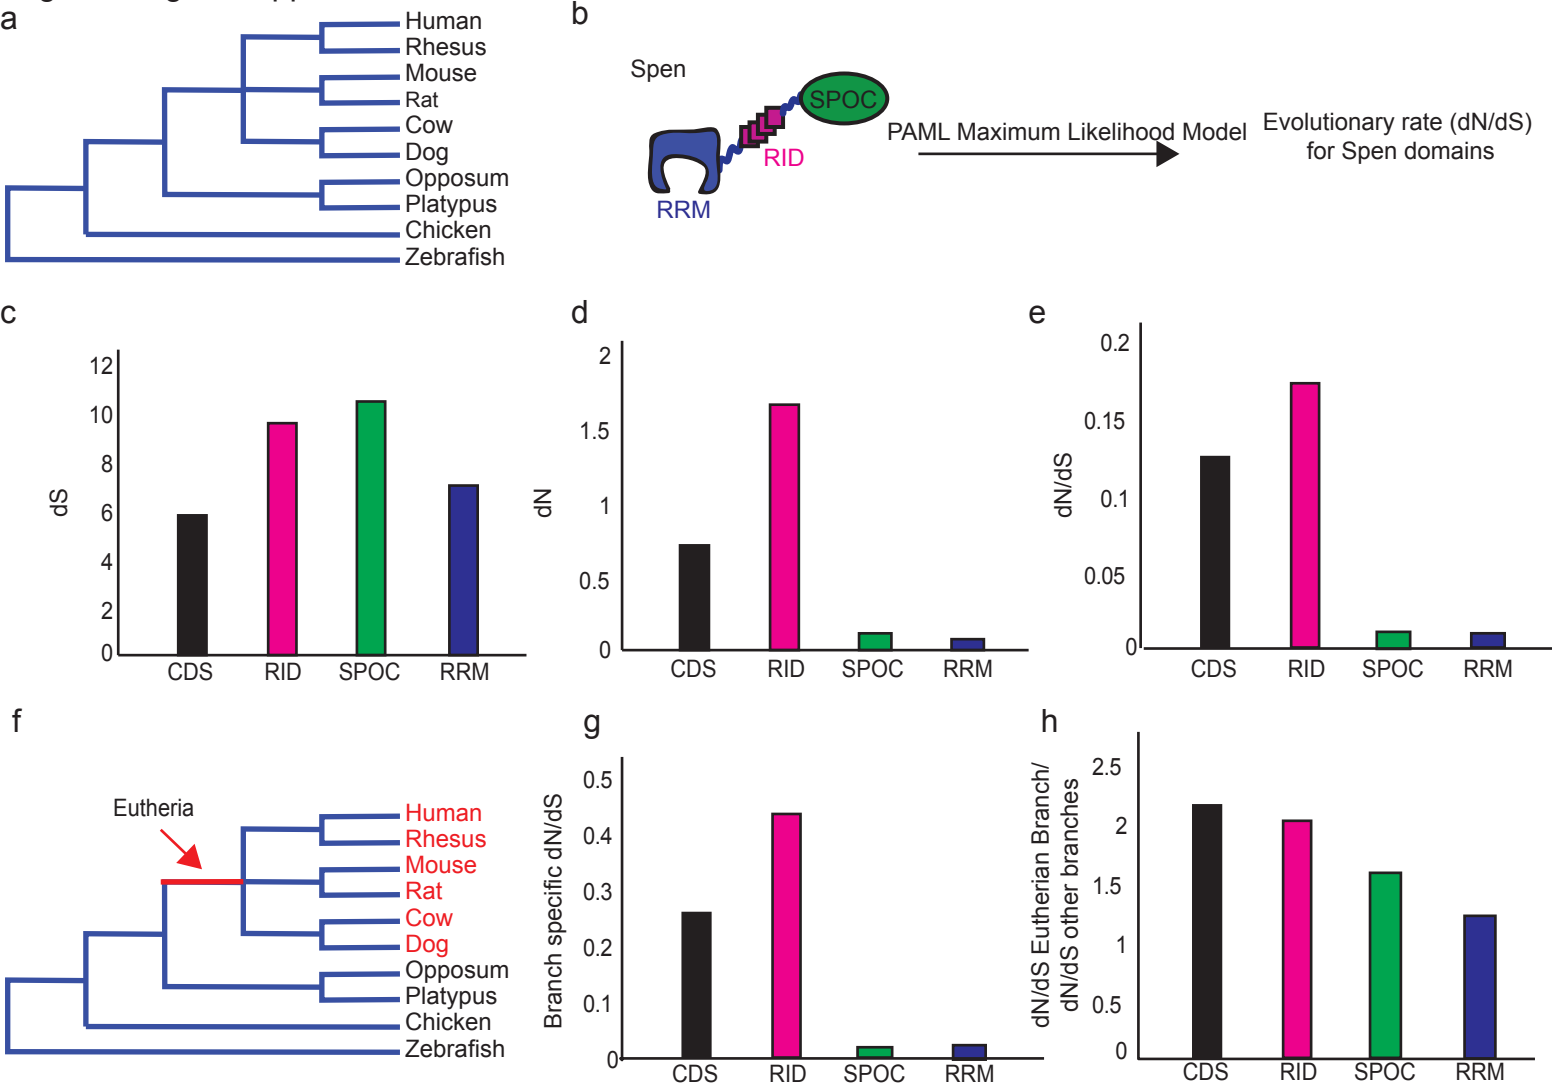

Supplement: supp [file elife_poa_e54508_Figure_6_figure_supplement_1.pdf › elife_poa_e54508_Figure_6_figure_supplement_1.pdf]

Figure 6- figure supplement 2

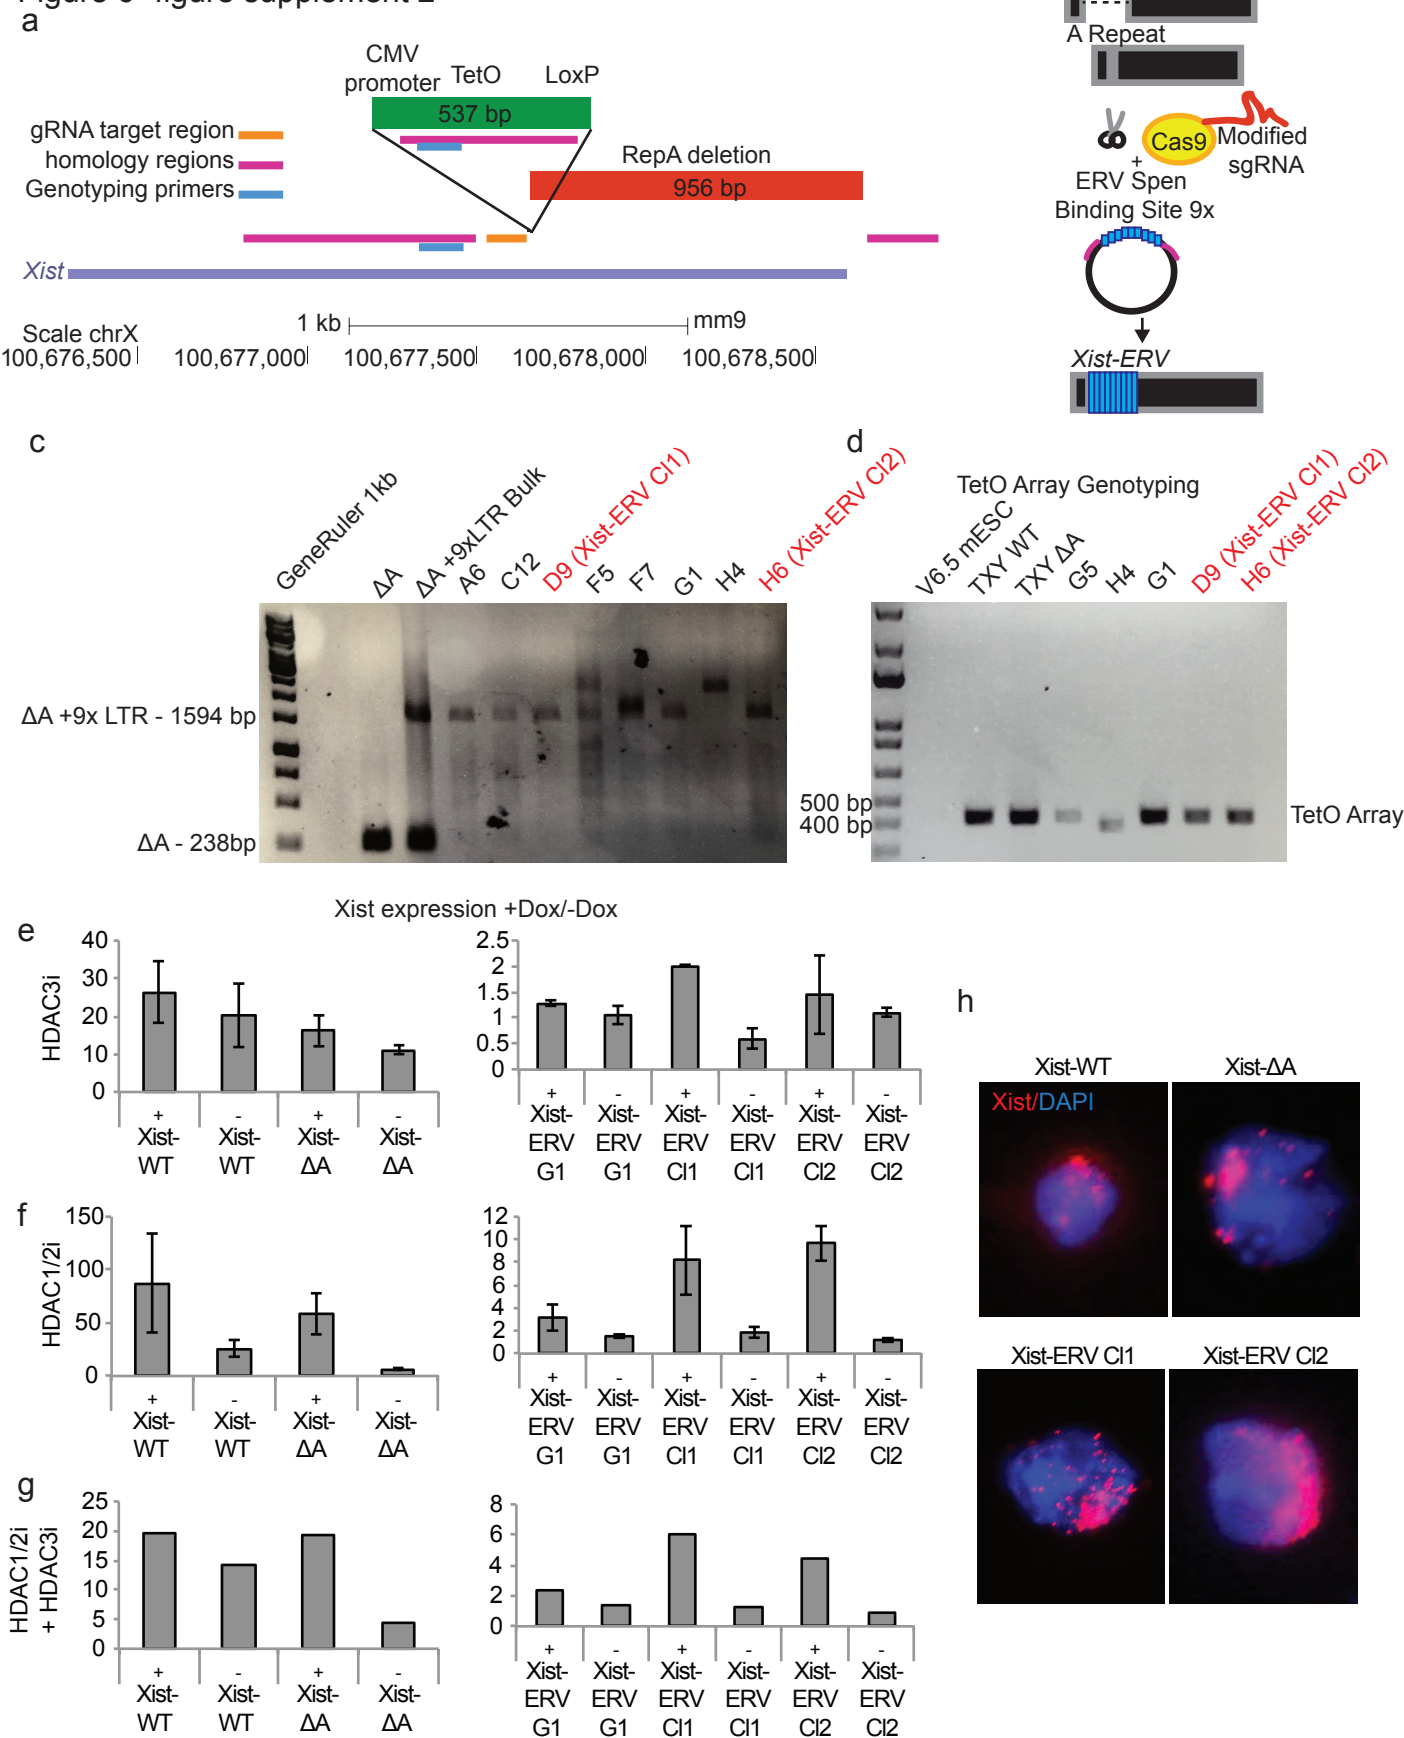

Supplement: supp [file elife_poa_e54508_Figure_6_figure_supplement_2.pdf › elife_poa_e54508_Figure_6_figure_supplement_2.pdf]

Figure 6- figure supplement 3

a

X-linked gene expression

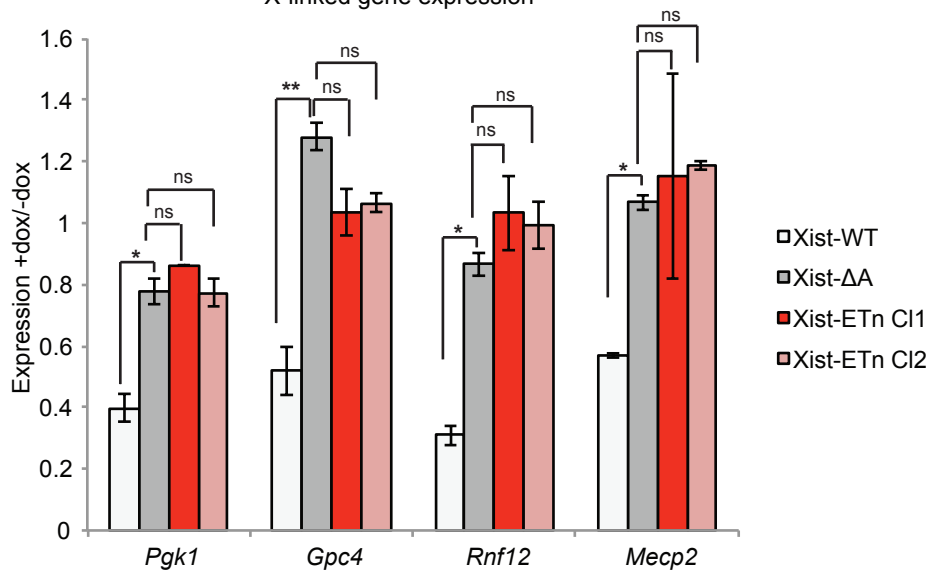

Supplement: supp [file elife_poa_e54508_Figure_6_figure_supplement_3.pdf › elife_poa_e54508_Figure_6_figure_supplement_3.pdf]
